# Supplementary material for: THAP11F80L cobalamin disorder-associated mutation reveals normal and pathogenic THAP11 functions in gene expression and cell proliferation
Source: PLoS One. 2020 Jan 6;15(1):e0224646. doi: 10.1371/journal.pone.0224646 (PMC6944463; doi:10.1371/journal.pone.0224646)
Supplement: S1 Table — Table listing the peaks identified in the ChIP-seq experiment (all peaks, and not only TSS-associated peaks). Each peak has been identified with a unique identifier (column A) and categorized as “common”, “F80L absent” or “F80L only” (see text. Column B). The exact peak position is detailed in columns D and E (genomic coordinates of the start and the end of the peak, respectively). The peak scores and counts in the THAP11WT (columns F and H) and THAP11WT (columns G and I) peaks are indicated. Details about the THAP11-associated motifs are indicated: total number of motifs in a region expanding 1000 bp on each side of the peak maximum (column J), genomic coordinates of the start (column K) and end (column L) of the closest motif to the peak center, motif sequence (column M), motif E-value relative to the consensus motif (column N) and the relative position of the motif to the peak (column O). Details of the genes identified under the peaks are listed, together with their RNA-seq data: number of genes having their TSS in a region expanding 250 bp on each side of the peak boundaries (column P), distance of the TSS gene to the peak (columns R, AB, AL and AV), gene strand (columns S, AC, AM and AW), gene type (columns T, AD, AN and AX), normalized gene mRNA levels (log2(RPKM)) in each of the THAP11WT (columns U and V; AE and AF; AO and AP; AY and AZ) and THAP11F80L (columns W and X; AG and AH; AQ and AR; BA and BB) biological replicates, the (log2) THAP11F80L versus THAP11WT fold change and associated adjusted p-value of gene expression values (columns Y and Z; AI and AJ; AS and AT; BC and BD). NA, non-applicable, meaning no such feature (motif of gene) relative to the peak. ND, non-determined, meaning gene not expressed in our dataset. (XLSX) [file pone.0224646.s010.xlsx]

## Sheet: S1 Table
Peak number (unique ID)	Peak type	Chrom	Peak Start	Peak End	Peak score WT scaled	Peak score F80L scaled	Peak count WT	Peak count F80L	Number of motifs	Motif start	Motif end	Motif Sequence	Motif Evalue	Motif relative position (distance peak max to motif center)	Number of genes	Gene1 name	Gene1 distance to peak	Gene1 strand	Gene1 General.gene.type	Gene1 RNAseq WT replicate 1	Gene1 RNAseq WT replicate 2	Gene1 RNAseq F80L replicate 1	Gene1 RNAseq F80L replicate 2	Gene1 RNAseq log2FoldChange F80L vs WT	Gene1 RNAseq padj F80L vs WT	Gene2 name	Gene2 distance to peak	Gene2 strand	Gene2 General.gene.type	Gene2 RNAseq WT replicate 1	Gene2 RNAseq WT replicate 2	Gene2 RNAseq F80L replicate 1	Gene2 RNAseq F80L replicate 2	Gene2 RNAseq log2FoldChange F80L vs WT	Gene2 RNAseq padj F80L vs WT	Gene3 name	Gene3 distance to peak	Gene3 strand	Gene3 General.gene.type	Gene3 RNAseq WT replicate 1	Gene3 RNAseq WT replicate 2	Gene3 RNAseq F80L replicate 1	Gene3 RNAseq F80L replicate 2	Gene3 RNAseq log2FoldChange F80L vs WT	Gene3 RNAseq padj F80L vs WT	Gene4 name	Gene3 distance to peak	Gene3 strand	Gene4 General.gene.type
1	F80L absent	chr19	38720282	38720695	4.553	-0.894257	586	11	7	38720470	38720492	CGCCCCCTGGGACGTGTAGTCC	2.66e-08	18	1	DPF1	-134	-	protein_coding	2.36457	2.35614	1.10434	1.86394	-0.886431	0.0280216	NA	NA	NA	NA	NA	NA	NA	NA	NA	NA	NA	NA	NA	NA	NA	NA	NA	NA	NA	NA	NA	NA	NA	NA
2	F80L absent	chr2	85829663	85830179	3.81291	-2.13112	461	4	3	85829868	85829890	CGCCCGCCGGGACGTGGAGTCC	5.31e-07	17	2	TMEM150A	398	-	protein_coding	1.9222	1.29866	0.604071	-0.37707	-1.41034	0.0211847	USP39	58	+	protein_coding	5.46041	5.64212	5.48059	5.55643	-0.0711167	0.802804	NA	NA	NA	NA	NA	NA	NA	NA	NA	NA	NA	NA	NA	NA
3	F80L absent	chr8	143484489	143484901	3.71498	-1.65825	339	7	2	143484618	143484640	GGGCCTCTGGGGCGGGTAGTCC	3.81e-07	12	2	TSNARE1	-94	-	protein_coding	2.61117	1.77821	1.53605	0.978196	-0.976254	0.0809598	RP13-467H17.1	318	+	ND	ND	ND	ND	ND	ND	ND	NA	NA	NA	NA	NA	NA	NA	NA	NA	NA	NA	NA	NA	NA
4	F80L absent	chr1	45965462	45966341	3.55356	-0.941897	482	14	6	45965846	45965868	TGCATCTTGGGATGCGTAGTTC	6.65e-08	10	2	CCDC163P	-150	-	ND	ND	ND	ND	ND	ND	ND	MMACHC	-176	+	protein_coding	3.30305	3.34625	1.1375	1.30451	-2.17266	3.32469e-33	NA	NA	NA	NA	NA	NA	NA	NA	NA	NA	NA	NA	NA	NA
5	F80L absent	chr7	30067584	30068242	4.02135	-0.700755	344	11	2	30067878	30067900	GGCCCGCAGGGAAATTGAGTCC	2.3e-06	19	0	NA	NA	NA	NA	NA	NA	NA	NA	NA	NA	NA	NA	NA	NA	NA	NA	NA	NA	NA	NA	NA	NA	NA	NA	NA	NA	NA	NA	NA	NA	NA	NA	NA	NA
6	F80L absent	chr1	32930262	32930841	3.65803	-1.60117	383	6	2	32930477	32930499	AGGGTGATGGGAGTTGTGGTCT	7.8e-08	34	2	RP1-27O5.3	107	+	ND	ND	ND	ND	ND	ND	ND	ZBTB8B	119	+	ND	ND	ND	ND	ND	ND	ND	NA	NA	NA	NA	NA	NA	NA	NA	NA	NA	NA	NA	NA	NA
7	F80L absent	chr20	35374502	35374893	4.20609	-0.813587	253	4	NA	NA	NA	NA	NA	NA	2	NDRG3	-216	-	protein_coding	4.68145	4.74739	4.83137	5.13299	0.174792	0.393557	AL132768.1	-238	+	ND	ND	ND	ND	ND	ND	ND	NA	NA	NA	NA	NA	NA	NA	NA	NA	NA	NA	NA	NA	NA
8	F80L absent	chr1	144931642	144932563	2.58459	-0.787521	376	50	3	144932162	144932184	GCTCTTCTGGGAGCTGTAGTCC	3.83e-08	0	0	NA	NA	NA	NA	NA	NA	NA	NA	NA	NA	NA	NA	NA	NA	NA	NA	NA	NA	NA	NA	NA	NA	NA	NA	NA	NA	NA	NA	NA	NA	NA	NA	NA	NA
9	F80L absent	chr8	141521112	141521836	3.66382	-0.99284	693	18	4	141521479	141521501	TGCCCCGTGGGAGTTGTAGTGT	1.76e-08	14	1	CHRAC1	-77	+	protein_coding	4.45088	4.6865	5.40327	5.54102	0.917278	8.93454e-09	NA	NA	NA	NA	NA	NA	NA	NA	NA	NA	NA	NA	NA	NA	NA	NA	NA	NA	NA	NA	NA	NA	NA	NA
10	F80L absent	chr10	120966634	120967115	3.25334	-1.29505	270	11	4	120966954	120966976	GGCCTGCTGGGAGCTGGAGTCC	1.06e-09	10	1	GRK5	227	+	protein_coding	2.63691	2.42223	3.22497	3.18745	0.578047	0.013335	NA	NA	NA	NA	NA	NA	NA	NA	NA	NA	NA	NA	NA	NA	NA	NA	NA	NA	NA	NA	NA	NA	NA	NA
11	F80L absent	chr4	1722672	1723282	2.35024	-1.16444	280	10	6	1722846	1722868	GGCGCTCTGGGAGATGCAGTCC	2.84e-08	8	2	TMEM129	108	-	protein_coding	4.18982	3.7137	3.76871	3.24489	-0.634487	0.0919822	TACC3	250	+	protein_coding	5.41447	5.2211	4.71425	5.18349	-0.479827	0.0502442	NA	NA	NA	NA	NA	NA	NA	NA	NA	NA	NA	NA	NA	NA
12	F80L absent	chr13	114145040	114145322	2.41544	-2.13669	247	6	4	114145142	114145164	GGGCCCACGGGAGCTCGCGCCC	0.000427	33	2	DCUN1D2	86	-	protein_coding	4.27426	4.35191	4.82985	4.749	0.277029	0.151517	TMCO3	129	+	protein_coding	4.78555	4.91265	4.94813	5.02459	-0.0488239	0.859879	NA	NA	NA	NA	NA	NA	NA	NA	NA	NA	NA	NA	NA	NA
13	F80L absent	chr1	227922894	227923248	2.38544	-1.52261	224	13	2	227923045	227923067	GGCGCCCTGCGTCTTCTGGTTC	0.000595	11	1	JMJD4	41	-	protein_coding	4.70874	4.34341	4.26679	3.93923	-0.596553	0.0660456	NA	NA	NA	NA	NA	NA	NA	NA	NA	NA	NA	NA	NA	NA	NA	NA	NA	NA	NA	NA	NA	NA	NA	NA
14	F80L absent	chr9	140317557	140317830	1.69735	-1.82672	191	11	2	140317521	140317543	GGCCAGGTGGGCGGTCTGGGCG	0.00052	145	2	EXD3	21	-	protein_coding	3.30451	2.57289	2.60407	2.48285	-0.412631	0.445968	NOXA1	109	+	ND	ND	ND	ND	ND	ND	ND	NA	NA	NA	NA	NA	NA	NA	NA	NA	NA	NA	NA	NA	NA
15	F80L absent	chr10	94351288	94351676	2.92391	-0.667874	185	8	1	94351467	94351489	TGCATGCTGGGATCCGTAGGCC	6.3e-08	7	0	NA	NA	NA	NA	NA	NA	NA	NA	NA	NA	NA	NA	NA	NA	NA	NA	NA	NA	NA	NA	NA	NA	NA	NA	NA	NA	NA	NA	NA	NA	NA	NA	NA	NA
16	F80L absent	chr13	113862909	113863462	1.99539	-1.8863	188	13	4	113863021	113863043	GTCCGTCTGGGTCCTGGCGCCC	0.000561	1	1	PCID2	-156	-	protein_coding	5.63314	5.70819	5.8387	5.84549	0.1044	0.664435	NA	NA	NA	NA	NA	NA	NA	NA	NA	NA	NA	NA	NA	NA	NA	NA	NA	NA	NA	NA	NA	NA	NA	NA
17	F80L absent	chr19	49617900	49618620	3.72771	-1.08788	499	15	2	49618302	49618324	GAGCTGCCGGGAGGCGTAGTCT	7.07e-07	22	0	NA	NA	NA	NA	NA	NA	NA	NA	NA	NA	NA	NA	NA	NA	NA	NA	NA	NA	NA	NA	NA	NA	NA	NA	NA	NA	NA	NA	NA	NA	NA	NA	NA	NA
18	F80L absent	chr17	66243760	66244217	2.16968	-2.10706	169	6	4	66244001	66244023	TCTATTCTGGAAGAGGCGGGTC	0.000385	5	2	AMZ2	-273	+	protein_coding	6.06932	6.11749	6.05333	6.35579	0.0915431	0.742996	RP11-147L13.2	91	-	ND	ND	ND	ND	ND	ND	ND	NA	NA	NA	NA	NA	NA	NA	NA	NA	NA	NA	NA	NA	NA
19	F80L absent	chr9	140473071	140473528	1.48374	-1.52177	204	20	2	140473210	140473232	TGGATGATGGGCTGTTTCGCCC	0.000454	88	1	DPH7	88	-	protein_coding	5.61589	5.72982	5.72683	5.7021	-0.00668077	0.981619	NA	NA	NA	NA	NA	NA	NA	NA	NA	NA	NA	NA	NA	NA	NA	NA	NA	NA	NA	NA	NA	NA	NA	NA
20	F80L absent	chr22	42915587	42916002	2.66127	-1.24972	155	6	3	42915812	42915834	GGGCCGCCGGGAGTTGCGGTTC	3.18e-07	20	1	RRP7A	14	-	protein_coding	5.1416	5.13504	5.02104	4.74846	-0.264744	0.339094	NA	NA	NA	NA	NA	NA	NA	NA	NA	NA	NA	NA	NA	NA	NA	NA	NA	NA	NA	NA	NA	NA	NA	NA
21	F80L absent	chr21	46359743	46360016	1.81746	-1.42819	162	15	NA	NA	NA	NA	NA	NA	2	C21orf67	-51	-	protein_coding	1.52607	1.1635	0.695994	0.594549	-0.760799	0.166522	FAM207A	46	+	protein_coding	4.41549	3.49953	3.7366	3.71809	-0.359621	0.602085	NA	NA	NA	NA	NA	NA	NA	NA	NA	NA	NA	NA	NA	NA
22	F80L absent	chr9	136282967	136283450	1.69433	-1.1825	205	18	4	136283142	136283164	GCGCTTCCGGGGACTGGAGCGT	8.72e-05	53	1	REXO4	-44	-	protein_coding	5.3837	5.12391	5.20085	5.15623	-0.0958706	0.752536	NA	NA	NA	NA	NA	NA	NA	NA	NA	NA	NA	NA	NA	NA	NA	NA	NA	NA	NA	NA	NA	NA	NA	NA
23	F80L absent	chr8	145911243	145911486	2.62899	-2.94224	124	1	NA	NA	NA	NA	NA	NA	1	ARHGAP39	-170	-	ND	ND	ND	ND	ND	ND	ND	NA	NA	NA	NA	NA	NA	NA	NA	NA	NA	NA	NA	NA	NA	NA	NA	NA	NA	NA	NA	NA	NA	NA	NA
24	F80L absent	chr19	1383651	1383993	2.28499	-1.19923	140	12	1	1383992	1384014	GGAGCCTCGGGTGTCGTGGTGG	0.000551	162	1	NDUFS7	-296	+	protein_coding	5.8711	4.31252	4.43962	3.47249	-0.955763	0.454436	NA	NA	NA	NA	NA	NA	NA	NA	NA	NA	NA	NA	NA	NA	NA	NA	NA	NA	NA	NA	NA	NA	NA	NA
25	F80L absent	chr5	271358	271990	1.57388	-2.08232	209	15	3	271614	271636	CGCCTGCGGGGAGGGCGGGGTC	0.000448	44	2	CTD-2083E4.6	-43	-	antisense	1.31615	0.887525	1.20163	0.613532	-0.21417	0.910493	PDCD6	62	+	protein_coding	7.24574	7.2521	7.23525	7.18359	-0.0651704	0.722383	NA	NA	NA	NA	NA	NA	NA	NA	NA	NA	NA	NA	NA	NA
26	F80L absent	chr13	108870617	108871105	2.01946	-0.78818	169	24	2	108870841	108870863	CTCCTGCTGCGAGCTGTGGCCC	0.000505	112	2	LIG4	-145	-	protein_coding	4.11936	4.17313	4.32625	4.20163	0.083745	0.717063	ABHD13	-134	+	protein_coding	3.42895	3.41143	3.6241	3.52607	0.130561	0.51644	NA	NA	NA	NA	NA	NA	NA	NA	NA	NA	NA	NA	NA	NA
27	F80L absent	chr17	77005749	77006194	3.8669	-0.105123	367	22	3	77005927	77005949	GGGCTGCTGGGAGCTGTGGTTT	4.35e-09	9	1	CANT1	-22	-	protein_coding	4.08066	3.60644	4.26679	3.96809	0.282097	0.295087	NA	NA	NA	NA	NA	NA	NA	NA	NA	NA	NA	NA	NA	NA	NA	NA	NA	NA	NA	NA	NA	NA	NA	NA
28	F80L absent	chr15	55700303	55700889	3.68905	-0.764941	302	7	5	55700564	55700586	TGCATGCCGTGACGCGTAGTCC	2.98e-06	26	2	CCPG1	112	-	protein_coding	3.98368	3.98732	3.13258	3.10098	-0.986196	6.42336e-14	C15orf65	150	+	protein_coding	1.0635	1.33342	1.26903	0.650765	-0.349587	0.788825	NA	NA	NA	NA	NA	NA	NA	NA	NA	NA	NA	NA	NA	NA
29	F80L absent	chr5	138533790	138534143	2.10577	-1.72512	115	6	3	138533981	138534003	GGAATTGTGGGAGTTGTGTCTG	1.8e-05	14	0	NA	NA	NA	NA	NA	NA	NA	NA	NA	NA	NA	NA	NA	NA	NA	NA	NA	NA	NA	NA	NA	NA	NA	NA	NA	NA	NA	NA	NA	NA	NA	NA	NA	NA
30	F80L absent	chr6	116892303	116892793	1.99322	-1.0776	150	14	2	116892565	116892587	GGCCGGCGCGGAGCTGCAGTTA	0.000301	42	1	RWDD1	-18	+	protein_coding	6.06932	6.37921	6.22207	6.56041	0.147139	0.656727	NA	NA	NA	NA	NA	NA	NA	NA	NA	NA	NA	NA	NA	NA	NA	NA	NA	NA	NA	NA	NA	NA	NA	NA
31	F80L absent	chr9	139622383	139622732	1.43346	-1.92139	141	13	3	139622574	139622596	AACTGGCCGGGAGGAGAAGTCA	0.000349	55	1	SNHG7	79	-	antisense	7.86344	7.41616	8.47078	6.98982	0.0220296	0.963009	NA	NA	NA	NA	NA	NA	NA	NA	NA	NA	NA	NA	NA	NA	NA	NA	NA	NA	NA	NA	NA	NA	NA	NA
32	F80L absent	chr13	113242387	113242725	1.82119	-2.41418	104	4	2	113242464	113242486	GGCATTGTGGGAAGCGCCCGCG	0.000433	69	1	TUBGCP3	-75	-	protein_coding	5.06824	5.09887	5.0955	5.28614	0.0519229	0.858046	NA	NA	NA	NA	NA	NA	NA	NA	NA	NA	NA	NA	NA	NA	NA	NA	NA	NA	NA	NA	NA	NA	NA	NA
33	F80L absent	chr5	81574088	81574568	2.84596	-0.642916	152	13	4	81574190	81574212	TGCTCGCGGTGGCTTGTGGCTC	0.000983	66	1	RPS23	68	-	protein_coding	11.0208	11.1541	10.8983	11.0679	-0.0734591	0.764337	NA	NA	NA	NA	NA	NA	NA	NA	NA	NA	NA	NA	NA	NA	NA	NA	NA	NA	NA	NA	NA	NA	NA	NA
34	F80L absent	chr10	5708544	5708910	2.63991	-1.3215	94	3	2	5708624	5708646	ACCGAGCCGGGAGTTGTAGTTC	8.21e-07	11	1	ASB13	-169	-	protein_coding	4.14649	3.78764	2.5435	2.31325	-1.40186	9.9753e-12	NA	NA	NA	NA	NA	NA	NA	NA	NA	NA	NA	NA	NA	NA	NA	NA	NA	NA	NA	NA	NA	NA	NA	NA
35	F80L absent	chr20	55964367	55964694	2.81166	-2.00916	104	3	3	55964457	55964479	GCGGCGCTGGGACTTGTAGGCC	1.23e-06	11	0	NA	NA	NA	NA	NA	NA	NA	NA	NA	NA	NA	NA	NA	NA	NA	NA	NA	NA	NA	NA	NA	NA	NA	NA	NA	NA	NA	NA	NA	NA	NA	NA	NA	NA
36	F80L absent	chr20	40321372	40322153	2.82996	-1.06031	126	6	4	40321589	40321611	AGCCCCCTGCGAAATGTAGTTT	6.91e-07	14	0	NA	NA	NA	NA	NA	NA	NA	NA	NA	NA	NA	NA	NA	NA	NA	NA	NA	NA	NA	NA	NA	NA	NA	NA	NA	NA	NA	NA	NA	NA	NA	NA	NA	NA
37	F80L absent	chr22	21336070	21337037	4.14155	-0.849891	673	14	3	21336570	21336592	GGCTCGCCGGGAAATGTGGTTT	3.53e-08	8	1	XXbac-B135H6.18	-509	-	ND	ND	ND	ND	ND	ND	ND	NA	NA	NA	NA	NA	NA	NA	NA	NA	NA	NA	NA	NA	NA	NA	NA	NA	NA	NA	NA	NA	NA	NA	NA
38	F80L absent	chr4	18022384	18022767	2.97108	-1.23724	89	5	4	18022523	18022545	TGACGGTTGGGATTTGAAGTTC	9.36e-07	10	0	NA	NA	NA	NA	NA	NA	NA	NA	NA	NA	NA	NA	NA	NA	NA	NA	NA	NA	NA	NA	NA	NA	NA	NA	NA	NA	NA	NA	NA	NA	NA	NA	NA	NA
39	F80L absent	chr6	157744435	157744726	1.8889	-1.83354	119	8	NA	NA	NA	NA	NA	NA	1	TMEM242	53	-	protein_coding	3.7148	3.84499	3.92979	3.69265	-0.174417	0.445015	NA	NA	NA	NA	NA	NA	NA	NA	NA	NA	NA	NA	NA	NA	NA	NA	NA	NA	NA	NA	NA	NA	NA	NA
40	F80L absent	chr6	143771724	143772078	2.00475	-0.930809	103	13	3	143771865	143771887	ACTACCCCCGGAAACGGGGTCC	0.000752	11	2	ADAT2	-91	-	protein_coding	3.84398	4.1102	3.99639	3.98732	-0.00525412	0.988606	PEX3	43	+	protein_coding	5.09001	5.17433	5.30305	5.18388	0.0951164	0.69676	NA	NA	NA	NA	NA	NA	NA	NA	NA	NA	NA	NA	NA	NA
41	F80L absent	chr17	5323204	5323602	2.82095	-1.22331	109	5	3	5323456	5323478	AGACCCCTGGGAGGTGTACTTT	2.16e-07	7	2	RPAIN	-442	+	protein_coding	5.69711	5.81481	5.84474	5.81686	0.0505971	0.856808	NUP88	77	-	protein_coding	7.00899	7.0063	6.88191	7.06016	-0.11491	0.558763	NA	NA	NA	NA	NA	NA	NA	NA	NA	NA	NA	NA	NA	NA
42	F80L absent	chr19	50553910	50554272	2.3562	-1.29501	102	6	2	50554117	50554139	GGTACTCTGGGAAGGGTAGTTC	2.21e-08	28	2	CTD-2126E3.1	-245	+	ND	ND	ND	ND	ND	ND	ND	CTD-2126E3.3	228	-	ND	ND	ND	ND	ND	ND	ND	NA	NA	NA	NA	NA	NA	NA	NA	NA	NA	NA	NA	NA	NA
43	F80L absent	chr19	40948970	40949436	3.42106	-0.0551345	281	21	3	40949191	40949213	AGCCCTCTGGGGATTGTAGTGC	1.05e-08	20	1	CTC-492K19.4	140	+	ND	ND	ND	ND	ND	ND	ND	NA	NA	NA	NA	NA	NA	NA	NA	NA	NA	NA	NA	NA	NA	NA	NA	NA	NA	NA	NA	NA	NA	NA	NA
44	F80L absent	chr16	1822894	1823280	1.97738	-1.63513	98	8	NA	NA	NA	NA	NA	NA	2	MRPS34	69	-	protein_coding	7.26679	6.79116	6.69808	6.67299	-0.423541	0.120293	EME2	121	+	protein_coding	3.37295	3.20945	3.45418	2.92979	-0.0976942	0.830773	NA	NA	NA	NA	NA	NA	NA	NA	NA	NA	NA	NA	NA	NA
45	F80L absent	chr1	45805634	45806424	3.05725	-0.181083	291	22	8	45806105	45806127	TGTACAACGGAACTTGTAGTCT	1.39e-05	14	1	MUTYH	113	-	protein_coding	3.38681	3.41278	1.68706	1.89142	-1.85585	7.86694e-11	NA	NA	NA	NA	NA	NA	NA	NA	NA	NA	NA	NA	NA	NA	NA	NA	NA	NA	NA	NA	NA	NA	NA	NA
46	F80L absent	chr5	171615254	171615902	3.60538	-0.720777	535	29	1	171615476	171615498	GGCACTCTGGAAACTGTAGTCC	7.64e-09	13	1	STK10	-188	-	protein_coding	2.87578	2.75702	2.58736	2.67356	-0.390352	0.162933	NA	NA	NA	NA	NA	NA	NA	NA	NA	NA	NA	NA	NA	NA	NA	NA	NA	NA	NA	NA	NA	NA	NA	NA
47	F80L absent	chr14	100842482	100842959	2.14537	-2.03028	96	3	3	100842649	100842671	GGCGTCCGTGGAAACGCCGTCC	0.000774	87	2	WARS	422	-	protein_coding	5.62205	5.75889	5.13258	5.13504	-0.553288	7.50231e-06	WDR25	35	+	protein_coding	2.1375	1.24489	1.71809	1.23266	-0.579569	0.36697	NA	NA	NA	NA	NA	NA	NA	NA	NA	NA	NA	NA	NA	NA
48	F80L absent	chr20	1099051	1099343	2.59059	-1.00564	87	6	2	1099064	1099086	GGCCTCTTGGAGGACGCTGTGC	0.000427	115	0	NA	NA	NA	NA	NA	NA	NA	NA	NA	NA	NA	NA	NA	NA	NA	NA	NA	NA	NA	NA	NA	NA	NA	NA	NA	NA	NA	NA	NA	NA	NA	NA	NA	NA
49	F80L absent	chr6	170151630	170151979	1.56102	-1.4199	116	15	NA	NA	NA	NA	NA	NA	2	TCTE3	-149	-	ND	ND	ND	ND	ND	ND	ND	ERMARD	-86	+	protein_coding	4.0505	3.9364	4.27426	4.13668	0.149164	0.618544	NA	NA	NA	NA	NA	NA	NA	NA	NA	NA	NA	NA	NA	NA
50	F80L absent	chr17	78388903	78389330	1.93691	-1.3254	104	9	5	78389172	78389194	TCCGCGCCGGAAACTGGGCTTT	0.000739	2	2	CTD-2047H16.4	-148	-	ND	ND	ND	ND	ND	ND	ND	ENDOV	-151	+	protein_coding	2.52857	2.06695	2.0635	1.48027	-0.299194	0.706785	NA	NA	NA	NA	NA	NA	NA	NA	NA	NA	NA	NA	NA	NA
51	F80L absent	chr9	127951900	127952526	3.99978	0.330952	318	23	4	127952232	127952254	AACCTGCTGGGACCCGTAGTCG	1.74e-06	12	1	PPP6C	5	-	protein_coding	5.66363	5.93239	5.60733	5.78477	-0.0316075	0.92569	NA	NA	NA	NA	NA	NA	NA	NA	NA	NA	NA	NA	NA	NA	NA	NA	NA	NA	NA	NA	NA	NA	NA	NA
52	F80L absent	chr12	133405328	133405702	1.86532	-1.47393	101	3	4	133405346	133405368	GGCGCCTCGGGGCTCGGGCTCC	0.00083	145	1	GOLGA3	-71	-	protein_coding	3.904	3.43296	4.17073	3.78136	0.0855589	0.844182	NA	NA	NA	NA	NA	NA	NA	NA	NA	NA	NA	NA	NA	NA	NA	NA	NA	NA	NA	NA	NA	NA	NA	NA
53	F80L absent	chr9	131534046	131534405	1.7313	-1.83112	98	5	2	131534514	131534536	TGGATGGAGGGGGCTGGCGCCC	0.000766	240	0	NA	NA	NA	NA	NA	NA	NA	NA	NA	NA	NA	NA	NA	NA	NA	NA	NA	NA	NA	NA	NA	NA	NA	NA	NA	NA	NA	NA	NA	NA	NA	NA	NA	NA
54	F80L absent	chr7	127291786	127292198	2.36087	-2.12633	89	3	2	127291990	127292012	GTAATGTCGGGAGGTGTAGTGG	1.62e-05	18	2	AC073934.6	74	-	ND	ND	ND	ND	ND	ND	ND	SND1	242	+	protein_coding	6.30049	6.50335	6.48575	6.53045	-0.130113	0.486145	NA	NA	NA	NA	NA	NA	NA	NA	NA	NA	NA	NA	NA	NA
55	F80L absent	chr19	11039262	11039732	1.46551	-1.0404	116	18	1	11039509	11039531	GGCTCTGAGGAGATTTTGGTCC	0.000648	38	2	YIPF2	-140	-	protein_coding	4.7021	4.05658	4.36527	3.96255	-0.464564	0.35779	C19orf52	-88	+	protein_coding	4.52293	4.45878	4.49761	4.45154	-0.138914	0.715343	NA	NA	NA	NA	NA	NA	NA	NA	NA	NA	NA	NA	NA	NA
56	F80L absent	chr3	185216648	185216989	2.17037	-1.10543	93	7	3	185216793	185216815	TGCACTCCGGGACGCAGCGGCG	0.000924	22	1	TMEM41A	27	-	protein_coding	3.68818	3.57531	3.70266	3.73227	0.127958	0.621028	NA	NA	NA	NA	NA	NA	NA	NA	NA	NA	NA	NA	NA	NA	NA	NA	NA	NA	NA	NA	NA	NA	NA	NA
57	F80L absent	chr22	42977787	42978202	1.75671	-1.886	91	4	1	42978027	42978049	GGGTCGCCGGGAGTTGCGGTTC	1.04e-06	2	1	RRP7B	50	-	pseudogene	3.55827	3.45812	3.28688	2.93923	-0.342798	0.233778	NA	NA	NA	NA	NA	NA	NA	NA	NA	NA	NA	NA	NA	NA	NA	NA	NA	NA	NA	NA	NA	NA	NA	NA
58	F80L absent	chr15	52043376	52043819	2.81926	-0.314185	161	12	4	52043724	52043746	AGCAGGCTGGGAAGCGTAGTTC	2.03e-08	36	2	LYSMD2	185	-	protein_coding	1.07039	1.62761	0.963474	1.12433	-0.295461	0.763212	TMOD2	161	+	protein_coding	2.82579	2.70929	0.111031	-0.0439433	-2.70781	2.47264e-65	NA	NA	NA	NA	NA	NA	NA	NA	NA	NA	NA	NA	NA	NA
59	F80L absent	chr22	26825103	26825756	2.15989	-0.446528	121	10	NA	NA	NA	NA	NA	NA	1	ASPHD2	-190	+	protein_coding	1.45943	1.46989	2.10769	1.96347	0.547792	0.0500548	NA	NA	NA	NA	NA	NA	NA	NA	NA	NA	NA	NA	NA	NA	NA	NA	NA	NA	NA	NA	NA	NA	NA	NA
60	F80L absent	chr8	145859493	145860524	1.08849	-2.69007	186	6	10	145860144	145860166	CGCCTGCAGAGGCCTGGAGTTC	0.000222	20	0	NA	NA	NA	NA	NA	NA	NA	NA	NA	NA	NA	NA	NA	NA	NA	NA	NA	NA	NA	NA	NA	NA	NA	NA	NA	NA	NA	NA	NA	NA	NA	NA	NA	NA
61	F80L absent	chr8	143751272	143751514	2.39982	-1.0738	79	3	3	143751286	143751308	GGCCGGATGGGTGCGGGCGCTC	0.000461	119	1	PSCA	333	+	ND	ND	ND	ND	ND	ND	ND	NA	NA	NA	NA	NA	NA	NA	NA	NA	NA	NA	NA	NA	NA	NA	NA	NA	NA	NA	NA	NA	NA	NA	NA
62	F80L absent	chr3	51572521	51572762	2.17048	-0.963562	76	6	1	51572688	51572710	CGCGGGCCGGGAGGGGGACGCT	0.000555	26	0	NA	NA	NA	NA	NA	NA	NA	NA	NA	NA	NA	NA	NA	NA	NA	NA	NA	NA	NA	NA	NA	NA	NA	NA	NA	NA	NA	NA	NA	NA	NA	NA	NA	NA
63	F80L absent	chr11	64808362	64808684	2.19791	-1.10079	85	9	6	64808546	64808568	TGCATCTCGGGAGGCCAACTCG	0.000327	14	1	SAC3D1	-150	+	protein_coding	3.64155	3.03562	3.1177	3.05485	-0.228376	0.664435	NA	NA	NA	NA	NA	NA	NA	NA	NA	NA	NA	NA	NA	NA	NA	NA	NA	NA	NA	NA	NA	NA	NA	NA
64	F80L absent	chr19	36363109	36363435	3.75672	-0.868141	95	4	4	36363234	36363256	GGCATTATGGGAGATGTAGTTC	4.62e-11	3	0	NA	NA	NA	NA	NA	NA	NA	NA	NA	NA	NA	NA	NA	NA	NA	NA	NA	NA	NA	NA	NA	NA	NA	NA	NA	NA	NA	NA	NA	NA	NA	NA	NA	NA
65	F80L absent	chr15	73075723	73076280	1.71768	-1.14716	95	15	2	73076288	73076310	CCCCTTCCCGGAACTCTAATCG	0.000953	168	0	NA	NA	NA	NA	NA	NA	NA	NA	NA	NA	NA	NA	NA	NA	NA	NA	NA	NA	NA	NA	NA	NA	NA	NA	NA	NA	NA	NA	NA	NA	NA	NA	NA	NA
66	F80L absent	chr10	135207534	135207900	1.89162	-1.95736	99	5	2	135207553	135207575	GGCTTCGCCGGAGGCGGAGGCA	0.000847	96	1	MTG1	-119	+	protein_coding	5.10014	4.83744	4.70984	4.70487	-0.334546	0.243668	NA	NA	NA	NA	NA	NA	NA	NA	NA	NA	NA	NA	NA	NA	NA	NA	NA	NA	NA	NA	NA	NA	NA	NA
67	F80L absent	chr6	131949183	131949542	1.8392	-1.67243	88	6	4	131949191	131949213	GGAAAGGCGGGGGTGATAGTAC	0.000278	153	2	MED23	7	-	protein_coding	4.62059	4.63052	4.80735	4.8268	0.115029	0.506876	ENPP3	220	+	ND	ND	ND	ND	ND	ND	ND	NA	NA	NA	NA	NA	NA	NA	NA	NA	NA	NA	NA	NA	NA
68	F80L absent	chr8	95731872	95732180	2.52891	-1.907	84	6	4	95732041	95732063	GGCGGCCCGGGAACCAGAGTGT	0.000162	2	1	DPY19L4	-95	+	protein_coding	4.73552	4.45418	4.65421	4.7447	-0.0718041	0.789133	NA	NA	NA	NA	NA	NA	NA	NA	NA	NA	NA	NA	NA	NA	NA	NA	NA	NA	NA	NA	NA	NA	NA	NA
69	F80L absent	chr12	12764521	12764945	3.08446	-0.231326	176	13	4	12764730	12764752	GGCATTCTGGGAATTGTGATTT	3.21e-09	26	1	CREBL2	28	+	protein_coding	3.28244	3.33771	3.16189	3.04789	-0.236357	0.282238	NA	NA	NA	NA	NA	NA	NA	NA	NA	NA	NA	NA	NA	NA	NA	NA	NA	NA	NA	NA	NA	NA	NA	NA
70	F80L absent	chr9	37485694	37486000	2.28505	-1.30696	85	1	3	37485779	37485801	TGCACTCTGGGTTTTGTAGGTC	3.68e-08	95	1	POLR1E	85	+	protein_coding	4.8166	4.9855	4.96625	4.90881	0.0113769	0.973773	NA	NA	NA	NA	NA	NA	NA	NA	NA	NA	NA	NA	NA	NA	NA	NA	NA	NA	NA	NA	NA	NA	NA	NA
71	F80L absent	chr17	1419740	1420243	1.48998	-1.62125	99	7	2	1419970	1419992	CGGGATCTGGGTGGTGCGGTTC	0.000105	76	2	INPP5K	191	-	protein_coding	3.9222	4.01167	4.17552	4.13668	0.0413797	0.911698	PITPNA-AS1	234	+	antisense	3.36737	2.25701	2.21101	1.99639	-0.823962	0.379711	NA	NA	NA	NA	NA	NA	NA	NA	NA	NA	NA	NA	NA	NA
72	F80L absent	chr5	125936508	125936795	1.813	-1.59954	74	5	4	125936528	125936550	AGGCCGCTGGGACAGGCTGGCC	3.12e-05	111	0	NA	NA	NA	NA	NA	NA	NA	NA	NA	NA	NA	NA	NA	NA	NA	NA	NA	NA	NA	NA	NA	NA	NA	NA	NA	NA	NA	NA	NA	NA	NA	NA	NA	NA
73	F80L absent	chr19	42388262	42388552	1.83562	-1.28559	86	11	1	42388355	42388377	CGGCCGGCGGGAGGAGTAGAGT	0.000164	50	0	NA	NA	NA	NA	NA	NA	NA	NA	NA	NA	NA	NA	NA	NA	NA	NA	NA	NA	NA	NA	NA	NA	NA	NA	NA	NA	NA	NA	NA	NA	NA	NA	NA	NA
74	F80L absent	chr8	101734404	101735328	5.00272	-0.1976	1185	18	4	101734932	101734954	TGCCGGCTGGGACTCGTAGTGC	1.59e-07	0	1	PABPC1	171	-	protein_coding	8.45685	8.82034	8.5694	9.07419	0.12538	0.766833	NA	NA	NA	NA	NA	NA	NA	NA	NA	NA	NA	NA	NA	NA	NA	NA	NA	NA	NA	NA	NA	NA	NA	NA
75	F80L absent	chr5	94890653	94891219	2.91154	-0.565504	195	11	2	94890816	94890838	CGCCTGATAGGAGTTGTAGTTC	8.72e-08	4	2	TTC37	-225	-	protein_coding	6.59171	6.54936	6.63575	6.43879	-0.0531759	0.798973	ARSK	-158	+	protein_coding	3.57773	3.53978	4.01525	4.03298	0.472599	0.00421653	NA	NA	NA	NA	NA	NA	NA	NA	NA	NA	NA	NA	NA	NA
76	F80L absent	chr11	64387152	64387651	3.06413	-0.387023	87	8	6	64387401	64387423	GAACTGATGGGAGTTGTAGTTC	3.81e-08	15	0	NA	NA	NA	NA	NA	NA	NA	NA	NA	NA	NA	NA	NA	NA	NA	NA	NA	NA	NA	NA	NA	NA	NA	NA	NA	NA	NA	NA	NA	NA	NA	NA	NA	NA
77	F80L absent	chr19	16652973	16653481	1.97648	-0.719918	133	15	2	16653086	16653108	GGGACTCCGGGAGGCGGGGCCG	5.77e-05	161	1	CHERP	114	-	protein_coding	3.44228	3.41414	3.04789	3.25701	-0.313189	0.31844	NA	NA	NA	NA	NA	NA	NA	NA	NA	NA	NA	NA	NA	NA	NA	NA	NA	NA	NA	NA	NA	NA	NA	NA
78	F80L absent	chr5	133968471	133968703	2.80785	-1.12366	56	7	4	133968581	133968603	AGACTGCCAGGAGGCGGAACCT	0.000574	1	0	NA	NA	NA	NA	NA	NA	NA	NA	NA	NA	NA	NA	NA	NA	NA	NA	NA	NA	NA	NA	NA	NA	NA	NA	NA	NA	NA	NA	NA	NA	NA	NA	NA	NA
79	F80L absent	chr19	35417673	35418187	2.091	-1.62129	102	4	5	35417848	35417870	CAGCCTCTGGGAAATGCAGTCC	1.23e-06	34	2	CTC-523E23.8	-214	-	ND	ND	ND	ND	ND	ND	ND	ZNF30	-123	+	protein_coding	2.22033	2.1635	2.58976	2.68706	0.366327	0.214788	NA	NA	NA	NA	NA	NA	NA	NA	NA	NA	NA	NA	NA	NA
80	F80L absent	chr3	50606627	50607012	2.16976	-1.66123	81	4	3	50606974	50606996	TGGTGGGTGGGTGGGGCAGCCT	0.000672	91	1	HEMK1	-236	+	protein_coding	2.66221	2.70708	2.65992	2.56803	0.0651501	0.887981	NA	NA	NA	NA	NA	NA	NA	NA	NA	NA	NA	NA	NA	NA	NA	NA	NA	NA	NA	NA	NA	NA	NA	NA
81	F80L absent	chr10	43278015	43278395	1.52917	-1.72454	88	4	1	43278222	43278244	ACACCGCCGGAAACGGAAATTC	0.000779	50	1	BMS1	44	+	protein_coding	5.07639	4.96023	5.09001	5.15218	0.0792785	0.70039	NA	NA	NA	NA	NA	NA	NA	NA	NA	NA	NA	NA	NA	NA	NA	NA	NA	NA	NA	NA	NA	NA	NA	NA
82	F80L absent	chr9	139294466	139294773	0.61981	-2.53192	100	8	NA	NA	NA	NA	NA	NA	0	NA	NA	NA	NA	NA	NA	NA	NA	NA	NA	NA	NA	NA	NA	NA	NA	NA	NA	NA	NA	NA	NA	NA	NA	NA	NA	NA	NA	NA	NA	NA	NA	NA	NA
83	F80L absent	chr9	139010653	139011005	0.885647	-2.67294	112	8	4	139010651	139010673	GGAGCAGGGGGAAGGGAAGTGC	0.000847	9	1	C9orf69	-98	-	protein_coding	5.43229	4.66846	4.75969	4.28244	-0.582157	0.465541	NA	NA	NA	NA	NA	NA	NA	NA	NA	NA	NA	NA	NA	NA	NA	NA	NA	NA	NA	NA	NA	NA	NA	NA
84	F80L absent	chr5	1345133	1345542	3.93035	-0.513032	653	24	5	1345227	1345249	GGCTCCCTGGGAAACGGAGTCT	7.59e-08	21	1	CLPTM1L	-123	-	protein_coding	8.15992	7.98942	8.02885	7.96128	-0.210538	0.353282	NA	NA	NA	NA	NA	NA	NA	NA	NA	NA	NA	NA	NA	NA	NA	NA	NA	NA	NA	NA	NA	NA	NA	NA
85	F80L absent	chr19	16683202	16683471	1.97741	-0.940761	67	6	1	16683262	16683284	CGACCAATGGGAAACGGCGTAG	0.000957	59	1	SLC35E1	-143	-	protein_coding	4.57592	4.44493	4.83238	4.76288	0.176616	0.258866	NA	NA	NA	NA	NA	NA	NA	NA	NA	NA	NA	NA	NA	NA	NA	NA	NA	NA	NA	NA	NA	NA	NA	NA
86	F80L absent	chr4	49272761	49273203	0.631347	-2.1755	131	24	1	49272612	49272634	GGACGTCCCGGAATCGCAGGCG	0.000679	194	0	NA	NA	NA	NA	NA	NA	NA	NA	NA	NA	NA	NA	NA	NA	NA	NA	NA	NA	NA	NA	NA	NA	NA	NA	NA	NA	NA	NA	NA	NA	NA	NA	NA	NA
87	F80L absent	chr9	138392408	138392686	0.946222	-2.07232	97	10	NA	NA	NA	NA	NA	NA	0	NA	NA	NA	NA	NA	NA	NA	NA	NA	NA	NA	NA	NA	NA	NA	NA	NA	NA	NA	NA	NA	NA	NA	NA	NA	NA	NA	NA	NA	NA	NA	NA	NA	NA
88	F80L absent	chr19	40561840	40562298	2.63794	-0.709666	80	8	3	40562151	40562173	TGGCCTCTGGGAAATACAGTCC	2.34e-07	4	1	ZNF780B	47	-	protein_coding	4.13175	3.91361	3.17313	3.40463	-0.344745	0.109761	NA	NA	NA	NA	NA	NA	NA	NA	NA	NA	NA	NA	NA	NA	NA	NA	NA	NA	NA	NA	NA	NA	NA	NA
89	F80L absent	chr5	5422125	5422980	2.61664	-2.02543	369	10	2	5422357	5422379	AGCGCGTCGGGAACTGTAGTCC	2.57e-07	21	0	NA	NA	NA	NA	NA	NA	NA	NA	NA	NA	NA	NA	NA	NA	NA	NA	NA	NA	NA	NA	NA	NA	NA	NA	NA	NA	NA	NA	NA	NA	NA	NA	NA	NA
90	F80L absent	chr1	10003310	10003618	2.14348	-1.56786	68	2	NA	NA	NA	NA	NA	NA	2	LZIC	1	-	protein_coding	4.47314	4.64443	4.60466	4.62585	0.0138098	0.966905	NMNAT1	22	+	protein_coding	1.54102	1.80735	1.60881	1.52105	-0.226947	0.657174	NA	NA	NA	NA	NA	NA	NA	NA	NA	NA	NA	NA	NA	NA
91	F80L absent	chr7	76178411	76178732	1.53568	-1.13455	67	11	4	76178548	76178570	GGTGTCCGGGGAGGCGGACTTC	0.000152	12	1	AC004980.7	106	+	pseudogene	0.790772	0.978196	1.41684	1.14405	0.256123	0.725924	NA	NA	NA	NA	NA	NA	NA	NA	NA	NA	NA	NA	NA	NA	NA	NA	NA	NA	NA	NA	NA	NA	NA	NA
92	F80L absent	chr17	41797974	41798345	1.63032	-1.24195	79	8	4	41798177	41798199	GGCGCCCCGAGAGTCGGGGTGA	0.000568	17	1	RP11-209M4.1	-355	-	ND	ND	ND	ND	ND	ND	ND	NA	NA	NA	NA	NA	NA	NA	NA	NA	NA	NA	NA	NA	NA	NA	NA	NA	NA	NA	NA	NA	NA	NA	NA
93	F80L absent	chr17	8286481	8287054	1.57743	-1.71207	86	7	4	8286846	8286868	CGGCACCTGGGAGTGAAGGTAC	0.000348	42	2	RP11-849F2.7	-262	-	ND	ND	ND	ND	ND	ND	ND	RPL26	-236	-	protein_coding	11.5433	11.7926	11.6241	12.1407	0.209161	0.562502	NA	NA	NA	NA	NA	NA	NA	NA	NA	NA	NA	NA	NA	NA
94	F80L absent	chr17	80023666	80023901	2.48843	-2.09552	67	1	6	80023727	80023749	CGGTTTCCGGGGAACGCGTTTC	0.000557	0	1	DUS1L	-20	-	protein_coding	6.06307	5.4793	5.57592	5.21684	-0.626616	0.0388966	NA	NA	NA	NA	NA	NA	NA	NA	NA	NA	NA	NA	NA	NA	NA	NA	NA	NA	NA	NA	NA	NA	NA	NA
95	F80L absent	chr21	46707707	46708139	1.60677	-1.56264	85	10	NA	NA	NA	NA	NA	NA	2	POFUT2	-110	-	protein_coding	3.25399	3.19535	3.37016	3.74524	0.241364	0.391705	BX322557.10	44	+	protein_coding	3.61589	3.53232	3.59694	3.54102	-0.0688058	0.875055	NA	NA	NA	NA	NA	NA	NA	NA	NA	NA	NA	NA	NA	NA
96	F80L absent	chrX	44402135	44402455	2.34529	-1.7024	69	3	NA	NA	NA	NA	NA	NA	1	FUNDC1	-48	-	protein_coding	4.49185	4.73281	4.63633	4.98732	0.177881	0.675413	NA	NA	NA	NA	NA	NA	NA	NA	NA	NA	NA	NA	NA	NA	NA	NA	NA	NA	NA	NA	NA	NA	NA	NA
97	F80L absent	chr12	124086380	124086709	2.1045	-1.35242	84	7	NA	NA	NA	NA	NA	NA	1	DDX55	80	+	protein_coding	4.53232	4.71205	4.59694	4.67469	-0.0373859	0.922529	NA	NA	NA	NA	NA	NA	NA	NA	NA	NA	NA	NA	NA	NA	NA	NA	NA	NA	NA	NA	NA	NA	NA	NA
98	F80L absent	chr7	134855052	134855627	1.21297	-1.11949	98	13	3	134855571	134855593	CAGCTGCCGGGAGCCGGAAGTG	0.00097	47	1	C7orf49	208	-	protein_coding	4.45286	4.44692	4.29499	4.20555	-0.239705	0.348997	NA	NA	NA	NA	NA	NA	NA	NA	NA	NA	NA	NA	NA	NA	NA	NA	NA	NA	NA	NA	NA	NA	NA	NA
99	F80L absent	chr10	44069694	44070326	3.73079	-0.438623	476	19	1	44070057	44070079	GGCTTGCTGGGACTTGTATTTC	2.84e-08	15	1	ZNF239	56	-	protein_coding	3.1127	3.05485	2.43829	2.35332	-0.666131	0.00607641	NA	NA	NA	NA	NA	NA	NA	NA	NA	NA	NA	NA	NA	NA	NA	NA	NA	NA	NA	NA	NA	NA	NA	NA
100	F80L absent	chr19	41770087	41770722	1.22003	-1.38565	83	11	1	41770131	41770153	GGCCTTCTCGTGGCCGTTGTTT	0.000208	165	0	NA	NA	NA	NA	NA	NA	NA	NA	NA	NA	NA	NA	NA	NA	NA	NA	NA	NA	NA	NA	NA	NA	NA	NA	NA	NA	NA	NA	NA	NA	NA	NA	NA	NA
101	F80L absent	chr6	170893614	170893864	1.07324	-1.6654	68	9	NA	NA	NA	NA	NA	NA	1	PDCD2	41	-	protein_coding	6.93168	7.0278	7.10444	7.10905	0.133241	0.456148	NA	NA	NA	NA	NA	NA	NA	NA	NA	NA	NA	NA	NA	NA	NA	NA	NA	NA	NA	NA	NA	NA	NA	NA
102	F80L absent	chr8	144623536	144623815	1.66473	-1.2363	79	9	2	144623797	144623819	TGAGCGCCGGGAAGTGGCCTGG	0.00094	61	1	ZC3H3	-52	-	protein_coding	1.58976	1.02857	1	0.918386	-0.431893	0.426657	NA	NA	NA	NA	NA	NA	NA	NA	NA	NA	NA	NA	NA	NA	NA	NA	NA	NA	NA	NA	NA	NA	NA	NA
103	F80L absent	chr19	49954400	49954823	1.22267	-1.28395	64	9	NA	NA	NA	NA	NA	NA	0	NA	NA	NA	NA	NA	NA	NA	NA	NA	NA	NA	NA	NA	NA	NA	NA	NA	NA	NA	NA	NA	NA	NA	NA	NA	NA	NA	NA	NA	NA	NA	NA	NA	NA
104	F80L absent	chr19	2739982	2740274	1.68892	-2.41387	71	4	1	2740319	2740341	AGGTGGATGGGAAGGGATTTCC	0.000606	135	2	AC006538.4	-82	-	ND	ND	ND	ND	ND	ND	ND	SLC39A3	22	-	protein_coding	4.65535	4.54535	4.81762	4.53916	-0.0916475	0.846439	NA	NA	NA	NA	NA	NA	NA	NA	NA	NA	NA	NA	NA	NA
105	F80L absent	chr16	56485231	56485691	1.85446	-0.481827	88	8	1	56485447	56485469	GACATGCCGGGAGTTGCAGTAC	1.56e-06	2	1	OGFOD1	-59	+	protein_coding	5.05572	5.16752	4.51979	4.5373	-0.601579	2.528e-06	NA	NA	NA	NA	NA	NA	NA	NA	NA	NA	NA	NA	NA	NA	NA	NA	NA	NA	NA	NA	NA	NA	NA	NA
106	F80L absent	chr16	4587984	4588929	3.63213	-1.01988	455	10	5	4588533	4588555	TGCATGCCGGGCACCGTAGTCC	3.14e-07	10	1	CDIP1	373	-	protein_coding	3.60644	3.25852	3.63459	3.57894	0.147784	0.685462	NA	NA	NA	NA	NA	NA	NA	NA	NA	NA	NA	NA	NA	NA	NA	NA	NA	NA	NA	NA	NA	NA	NA	NA
107	F80L absent	chr22	46431796	46432142	1.66934	-1.36958	68	6	NA	NA	NA	NA	NA	NA	0	NA	NA	NA	NA	NA	NA	NA	NA	NA	NA	NA	NA	NA	NA	NA	NA	NA	NA	NA	NA	NA	NA	NA	NA	NA	NA	NA	NA	NA	NA	NA	NA	NA	NA
108	F80L absent	chr10	103454042	103454493	1.15847	-1.9243	77	8	2	103454071	103454093	CGCGTCCCGGGAAAGGGCGGGG	0.000877	101	0	NA	NA	NA	NA	NA	NA	NA	NA	NA	NA	NA	NA	NA	NA	NA	NA	NA	NA	NA	NA	NA	NA	NA	NA	NA	NA	NA	NA	NA	NA	NA	NA	NA	NA
109	F80L absent	chr17	4046080	4046431	1.73917	-1.68658	75	10	NA	NA	NA	NA	NA	NA	2	ZZEF1	59	-	protein_coding	3.82782	3.99005	4.19535	4.18824	0.11033	0.638252	CYB5D2	207	+	protein_coding	3.6017	3.37851	3.28244	3.20006	-0.282301	0.329874	NA	NA	NA	NA	NA	NA	NA	NA	NA	NA	NA	NA	NA	NA
110	F80L absent	chr1	36554313	36554678	1.25771	-1.39896	84	11	4	36554420	36554442	CGCTCCCTGGGGCCTAGAGTTT	5.24e-05	25	1	ADPRHL2	-19	+	protein_coding	4.25852	4.05137	4.15623	4.04789	-0.0796875	0.82435	NA	NA	NA	NA	NA	NA	NA	NA	NA	NA	NA	NA	NA	NA	NA	NA	NA	NA	NA	NA	NA	NA	NA	NA
111	F80L absent	chr9	135230124	135230399	1.2082	-1.72068	66	9	NA	NA	NA	NA	NA	NA	1	SETX	111	-	protein_coding	4.88947	4.7666	5.01748	4.87627	0.0728176	0.735355	NA	NA	NA	NA	NA	NA	NA	NA	NA	NA	NA	NA	NA	NA	NA	NA	NA	NA	NA	NA	NA	NA	NA	NA
112	F80L absent	chr3	56502569	56502857	2.57583	-0.886664	68	3	NA	NA	NA	NA	NA	NA	1	ERC2	-322	-	protein_coding	1.29866	1.43829	1.33914	1.15704	-0.0769648	0.911719	NA	NA	NA	NA	NA	NA	NA	NA	NA	NA	NA	NA	NA	NA	NA	NA	NA	NA	NA	NA	NA	NA	NA	NA
113	F80L absent	chr16	15981858	15982604	2.85849	-0.597994	170	12	4	15982038	15982060	GGGGTTGTGGGAATTGTAGTCA	2.35e-08	11	1	FOPNL	251	-	protein_coding	4.84549	5.08619	5.26191	5.15137	0.18328	0.482959	NA	NA	NA	NA	NA	NA	NA	NA	NA	NA	NA	NA	NA	NA	NA	NA	NA	NA	NA	NA	NA	NA	NA	NA
114	F80L absent	chr2	70417742	70418363	2.45556	-0.637021	176	19	4	70417975	70417997	TTTCCGCTGGGAACCCGAGCTC	0.000256	112	0	NA	NA	NA	NA	NA	NA	NA	NA	NA	NA	NA	NA	NA	NA	NA	NA	NA	NA	NA	NA	NA	NA	NA	NA	NA	NA	NA	NA	NA	NA	NA	NA	NA	NA
115	F80L absent	chr20	60877743	60878081	1.43573	-2.17453	68	6	NA	NA	NA	NA	NA	NA	0	NA	NA	NA	NA	NA	NA	NA	NA	NA	NA	NA	NA	NA	NA	NA	NA	NA	NA	NA	NA	NA	NA	NA	NA	NA	NA	NA	NA	NA	NA	NA	NA	NA	NA
116	F80L absent	chr21	45209312	45209667	1.22107	-1.46007	84	13	NA	NA	NA	NA	NA	NA	1	RRP1	-95	+	protein_coding	5.58195	5.54659	5.64357	5.47735	-0.242163	0.354892	NA	NA	NA	NA	NA	NA	NA	NA	NA	NA	NA	NA	NA	NA	NA	NA	NA	NA	NA	NA	NA	NA	NA	NA
117	F80L absent	chr1	55181293	55181579	1.94634	-1.54427	66	6	NA	NA	NA	NA	NA	NA	1	TTC4	59	+	protein_coding	4.89482	4.88264	4.99141	4.96947	0.0503682	0.858593	NA	NA	NA	NA	NA	NA	NA	NA	NA	NA	NA	NA	NA	NA	NA	NA	NA	NA	NA	NA	NA	NA	NA	NA
118	F80L absent	chr3	47422091	47422848	3.00439	-0.785562	302	9	1	47422436	47422458	GGCCTGCCGGGAGTTGCAGTGA	3.81e-07	61	2	RP11-708J19.1	20	-	ND	ND	ND	ND	ND	ND	ND	PTPN23	32	+	protein_coding	0.748461	0.85599	1.34483	0.941106	0.204644	0.760462	NA	NA	NA	NA	NA	NA	NA	NA	NA	NA	NA	NA	NA	NA
119	F80L absent	chr1	3712864	3713232	1.81341	-2.61289	62	1	1	3713059	3713081	AGCACCCTGGTGGGTGGGTGCC	0.000853	7	1	LRRC47	20	-	protein_coding	4.62469	4.59574	4.72955	4.63052	-0.189434	0.433246	NA	NA	NA	NA	NA	NA	NA	NA	NA	NA	NA	NA	NA	NA	NA	NA	NA	NA	NA	NA	NA	NA	NA	NA
120	F80L absent	chr1	42800816	42801047	1.17756	-1.55483	64	8	NA	NA	NA	NA	NA	NA	0	NA	NA	NA	NA	NA	NA	NA	NA	NA	NA	NA	NA	NA	NA	NA	NA	NA	NA	NA	NA	NA	NA	NA	NA	NA	NA	NA	NA	NA	NA	NA	NA	NA	NA
121	F80L absent	chr5	1857181	1857543	1.07053	-1.77872	67	12	NA	NA	NA	NA	NA	NA	0	NA	NA	NA	NA	NA	NA	NA	NA	NA	NA	NA	NA	NA	NA	NA	NA	NA	NA	NA	NA	NA	NA	NA	NA	NA	NA	NA	NA	NA	NA	NA	NA	NA	NA
122	F80L absent	chr1	46767428	46767908	1.34044	-1.7611	96	9	3	46767916	46767938	GGCAGTCCGGGATCCCCGGGCC	0.000473	168	0	NA	NA	NA	NA	NA	NA	NA	NA	NA	NA	NA	NA	NA	NA	NA	NA	NA	NA	NA	NA	NA	NA	NA	NA	NA	NA	NA	NA	NA	NA	NA	NA	NA	NA
123	F80L absent	chr19	49485631	49485916	3.04473	-1.13392	62	3	4	49485691	49485713	TAGCTTCTGGGATTTGTAGTTT	1.03e-08	28	0	NA	NA	NA	NA	NA	NA	NA	NA	NA	NA	NA	NA	NA	NA	NA	NA	NA	NA	NA	NA	NA	NA	NA	NA	NA	NA	NA	NA	NA	NA	NA	NA	NA	NA
124	F80L absent	chr16	30886495	30886855	1.52328	-1.19069	93	19	NA	NA	NA	NA	NA	NA	2	MIR4519	-132	+	antisense	1.03562	0.9855	1.1635	0.918386	-0.106951	0.924149	MIR4519	-31	-	antisense	1.03562	0.9855	1.1635	0.918386	-0.106951	0.924149	NA	NA	NA	NA	NA	NA	NA	NA	NA	NA	NA	NA	NA	NA
125	F80L absent	chr16	770930	771205	1.52537	-1.25145	57	11	NA	NA	NA	NA	NA	NA	0	NA	NA	NA	NA	NA	NA	NA	NA	NA	NA	NA	NA	NA	NA	NA	NA	NA	NA	NA	NA	NA	NA	NA	NA	NA	NA	NA	NA	NA	NA	NA	NA	NA	NA
126	F80L absent	chr4	120375715	120376225	1.78339	-0.748695	71	14	NA	NA	NA	NA	NA	NA	1	RP11-33B1.1	-24	+	pseudogene	3.0321	3.33056	3.2555	3.28244	0.0210511	0.977777	NA	NA	NA	NA	NA	NA	NA	NA	NA	NA	NA	NA	NA	NA	NA	NA	NA	NA	NA	NA	NA	NA	NA	NA
127	F80L absent	chr14	104028593	104029475	1.10653	-1.49602	120	6	NA	NA	NA	NA	NA	NA	3	BAG5	134	-	protein_coding	4.44162	4.45088	4.03474	3.9782	-0.505603	6.37118e-06	RP11-73M18.2	265	+	protein_coding	2.60407	1.72247	1.15704	0.807355	-1.27015	0.00699951	APOPT1	265	+	protein_coding	3.852	3.96532	3.36457	3.51223	-0.475215	0.117656	NA	NA	NA	NA
128	F80L absent	chr12	123465030	123465317	1.74373	-3.37504	57	0	NA	NA	NA	NA	NA	NA	0	NA	NA	NA	NA	NA	NA	NA	NA	NA	NA	NA	NA	NA	NA	NA	NA	NA	NA	NA	NA	NA	NA	NA	NA	NA	NA	NA	NA	NA	NA	NA	NA	NA	NA
129	F80L absent	chr1	101360332	101360817	2.03406	-0.870842	56	6	NA	NA	NA	NA	NA	NA	1	RP4-549L20.3	-90	+	ND	ND	ND	ND	ND	ND	ND	NA	NA	NA	NA	NA	NA	NA	NA	NA	NA	NA	NA	NA	NA	NA	NA	NA	NA	NA	NA	NA	NA	NA	NA
130	F80L absent	chr15	68569965	68570424	1.33284	-0.910448	75	17	NA	NA	NA	NA	NA	NA	2	FEM1B	-53	+	protein_coding	5.66903	5.62088	5.82273	5.73877	0.0371481	0.882474	RP11-315D16.4	138	-	ND	ND	ND	ND	ND	ND	ND	NA	NA	NA	NA	NA	NA	NA	NA	NA	NA	NA	NA	NA	NA
131	F80L absent	chr2	122512988	122513320	1.80041	-1.782	64	2	NA	NA	NA	NA	NA	NA	0	NA	NA	NA	NA	NA	NA	NA	NA	NA	NA	NA	NA	NA	NA	NA	NA	NA	NA	NA	NA	NA	NA	NA	NA	NA	NA	NA	NA	NA	NA	NA	NA	NA	NA
132	F80L absent	chr8	145634646	145634881	1.79067	-1.95264	75	6	NA	NA	NA	NA	NA	NA	2	CPSF1	-10	-	protein_coding	5.6522	5.1639	5.34837	4.9514	-0.505412	0.112185	GS1-393G12.14	113	+	ND	ND	ND	ND	ND	ND	ND	NA	NA	NA	NA	NA	NA	NA	NA	NA	NA	NA	NA	NA	NA
133	F80L absent	chr4	1857731	1858567	4.53579	-0.325207	1160	47	6	1858009	1858031	TGCACGCCGGGATCGGTAGTCC	1.07e-07	8	1	LETM1	-175	-	protein_coding	5.01837	4.69488	4.74416	4.5404	-0.190821	0.51707	NA	NA	NA	NA	NA	NA	NA	NA	NA	NA	NA	NA	NA	NA	NA	NA	NA	NA	NA	NA	NA	NA	NA	NA
134	F80L absent	chr5	415469	415802	1.10302	-1.72188	369	58	9	415716	415738	TGCCTGGTGGGGCGGGAGGCCT	0.000214	2	0	NA	NA	NA	NA	NA	NA	NA	NA	NA	NA	NA	NA	NA	NA	NA	NA	NA	NA	NA	NA	NA	NA	NA	NA	NA	NA	NA	NA	NA	NA	NA	NA	NA	NA
135	F80L absent	chr19	49490246	49490631	1.64196	-1.43642	55	2	NA	NA	NA	NA	NA	NA	0	NA	NA	NA	NA	NA	NA	NA	NA	NA	NA	NA	NA	NA	NA	NA	NA	NA	NA	NA	NA	NA	NA	NA	NA	NA	NA	NA	NA	NA	NA	NA	NA	NA	NA
136	F80L absent	chr9	132403959	132404509	0.85736	-1.82341	86	13	NA	NA	NA	NA	NA	NA	1	ASB6	210	-	protein_coding	4.21412	3.98368	3.90111	3.84398	-0.251609	0.327746	NA	NA	NA	NA	NA	NA	NA	NA	NA	NA	NA	NA	NA	NA	NA	NA	NA	NA	NA	NA	NA	NA	NA	NA
137	F80L absent	chr21	46961808	46962443	2.31982	-1.38565	295	11	3	46962344	46962366	CGCCTTGTGGGCGCTGTAGTCC	2.9e-07	42	0	NA	NA	NA	NA	NA	NA	NA	NA	NA	NA	NA	NA	NA	NA	NA	NA	NA	NA	NA	NA	NA	NA	NA	NA	NA	NA	NA	NA	NA	NA	NA	NA	NA	NA
138	F80L absent	chr7	55433702	55433999	2.10112	-1.52592	57	5	4	55433908	55433930	ATCAGGACGGGAAGGTGAGTCG	0.000896	30	0	NA	NA	NA	NA	NA	NA	NA	NA	NA	NA	NA	NA	NA	NA	NA	NA	NA	NA	NA	NA	NA	NA	NA	NA	NA	NA	NA	NA	NA	NA	NA	NA	NA	NA
139	F80L absent	chr12	2904856	2905425	4.25794	-0.452768	486	16	2	2905072	2905094	GGCATGCCGGGAGCTGTAGTCC	5.64e-10	6	0	NA	NA	NA	NA	NA	NA	NA	NA	NA	NA	NA	NA	NA	NA	NA	NA	NA	NA	NA	NA	NA	NA	NA	NA	NA	NA	NA	NA	NA	NA	NA	NA	NA	NA
140	F80L absent	chr16	90038975	90039332	1.28297	-1.33065	83	5	NA	NA	NA	NA	NA	NA	2	CENPBD1	-211	-	protein_coding	2.02857	1.86394	1.21412	1.23879	-0.745032	0.0156297	AFG3L1P	-159	+	pseudogene	3.7666	4.04614	3.49825	3.44361	-0.595406	0.00237603	NA	NA	NA	NA	NA	NA	NA	NA	NA	NA	NA	NA	NA	NA
141	F80L absent	chr6	150038789	150039029	0.811092	-2.25661	72	5	NA	NA	NA	NA	NA	NA	0	NA	NA	NA	NA	NA	NA	NA	NA	NA	NA	NA	NA	NA	NA	NA	NA	NA	NA	NA	NA	NA	NA	NA	NA	NA	NA	NA	NA	NA	NA	NA	NA	NA	NA
142	F80L absent	chr9	135906127	135906470	1.29153	-1.02771	98	11	2	135906233	135906255	GGCCTCCAGGGAGCAAATGGCC	0.00085	97	1	GTF3C5	-222	+	protein_coding	6.7866	6.62732	6.58376	6.46172	-0.226464	0.210622	NA	NA	NA	NA	NA	NA	NA	NA	NA	NA	NA	NA	NA	NA	NA	NA	NA	NA	NA	NA	NA	NA	NA	NA
143	F80L absent	chr3	10362706	10362970	2.29393	-1.56598	79	5	3	10362954	10362976	GGGGCTCTGGTTGCCGCAGTTA	0.000407	110	1	SEC13	24	-	protein_coding	6.18686	6.09487	5.99842	6.08683	-0.113202	0.597223	NA	NA	NA	NA	NA	NA	NA	NA	NA	NA	NA	NA	NA	NA	NA	NA	NA	NA	NA	NA	NA	NA	NA	NA
144	F80L absent	chr9	37800654	37800942	2.06666	-0.443576	93	11	1	37800776	37800798	TGCACGCCGGAAGTGGCAGCTG	0.000104	27	1	DCAF10	-299	+	protein_coding	3.81967	3.85599	3.79181	3.73877	-0.179949	0.458434	NA	NA	NA	NA	NA	NA	NA	NA	NA	NA	NA	NA	NA	NA	NA	NA	NA	NA	NA	NA	NA	NA	NA	NA
145	F80L absent	chr10	38299304	38299960	3.61807	-0.693951	246	8	4	38299507	38299529	GGCCTCACGGGAAAGGTAGTTT	3.05e-08	1	1	ZNF33A	-54	+	protein_coding	5.0237	5.0027	3.57168	3.41414	-1.47162	5.82144e-53	NA	NA	NA	NA	NA	NA	NA	NA	NA	NA	NA	NA	NA	NA	NA	NA	NA	NA	NA	NA	NA	NA	NA	NA
146	F80L absent	chrX	70288205	70288494	1.5119	-2.4021	51	2	NA	NA	NA	NA	NA	NA	1	SNX12	-76	-	protein_coding	4.94158	4.81762	4.97636	4.84398	-0.0686101	0.811309	NA	NA	NA	NA	NA	NA	NA	NA	NA	NA	NA	NA	NA	NA	NA	NA	NA	NA	NA	NA	NA	NA	NA	NA
147	F80L absent	chr19	11601878	11602124	2.85404	-1.48011	66	2	3	11602026	11602048	GAGATGCTGGGAAATGTAGTCG	2.33e-08	30	0	NA	NA	NA	NA	NA	NA	NA	NA	NA	NA	NA	NA	NA	NA	NA	NA	NA	NA	NA	NA	NA	NA	NA	NA	NA	NA	NA	NA	NA	NA	NA	NA	NA	NA
148	F80L absent	chr7	75115097	75115792	2.23711	-1.37219	106	5	4	75115641	75115663	GGTGTCCCGGGAGGCGGACTTC	3.4e-05	30	2	AC006014.7	-59	-	ND	ND	ND	ND	ND	ND	ND	POM121C	104	-	protein_coding	3.10098	3.86493	3.57168	3.81147	-0.127007	0.763018	NA	NA	NA	NA	NA	NA	NA	NA	NA	NA	NA	NA	NA	NA
149	F80L absent	chr17	40171940	40172207	1.80132	-2.71272	45	2	NA	NA	NA	NA	NA	NA	0	NA	NA	NA	NA	NA	NA	NA	NA	NA	NA	NA	NA	NA	NA	NA	NA	NA	NA	NA	NA	NA	NA	NA	NA	NA	NA	NA	NA	NA	NA	NA	NA	NA	NA
150	F80L absent	chr7	1199776	1200220	1.29504	-1.80124	58	4	NA	NA	NA	NA	NA	NA	2	ZFAND2A	397	-	protein_coding	2.99458	2.87971	3.2032	3.47119	0.272997	0.628518	AC091729.9	12	+	antisense	1.1177	1.0635	0.333424	0.669027	-0.542094	0.530027	NA	NA	NA	NA	NA	NA	NA	NA	NA	NA	NA	NA	NA	NA
151	F80L absent	chr18	34408542	34409155	3.36137	-0.288153	355	21	2	34408807	34408829	GGCATGCCGGGAACGGTAGTTC	5.6e-09	20	2	TPGS2	310	-	protein_coding	5.84549	5.99639	5.57259	5.8674	-0.322427	0.0736202	KIAA1328	221	+	protein_coding	1.8953	2.10434	1.99277	2.10098	-0.0510047	0.927148	NA	NA	NA	NA	NA	NA	NA	NA	NA	NA	NA	NA	NA	NA
152	F80L absent	chr12	112279740	112280036	1.77232	-2.51445	55	0	NA	NA	NA	NA	NA	NA	1	MAPKAPK5	-106	+	protein_coding	5.04308	5.11936	5.19731	5.32409	0.166954	0.403398	NA	NA	NA	NA	NA	NA	NA	NA	NA	NA	NA	NA	NA	NA	NA	NA	NA	NA	NA	NA	NA	NA	NA	NA
153	F80L absent	chr10	127511540	127511787	1.69203	-0.800612	54	11	NA	NA	NA	NA	NA	NA	1	UROS	154	-	protein_coding	5.22188	5.23764	5.01703	4.94579	-0.290496	0.115361	NA	NA	NA	NA	NA	NA	NA	NA	NA	NA	NA	NA	NA	NA	NA	NA	NA	NA	NA	NA	NA	NA	NA	NA
154	F80L absent	chr7	141250995	141251440	1.3068	-1.54583	61	7	NA	NA	NA	NA	NA	NA	2	RP11-744I24.2	-113	-	ND	ND	ND	ND	ND	ND	ND	AGK	-228	+	protein_coding	4.88118	4.93357	4.96947	4.97957	0.000639857	0.998102	NA	NA	NA	NA	NA	NA	NA	NA	NA	NA	NA	NA	NA	NA
155	F80L absent	chr19	2461875	2462416	2.64798	-0.377279	273	18	6	2462167	2462189	GGCTTTCTGGGACTTGGAGTCC	2.59e-09	6	1	AC005624.2	38	-	ND	ND	ND	ND	ND	ND	ND	NA	NA	NA	NA	NA	NA	NA	NA	NA	NA	NA	NA	NA	NA	NA	NA	NA	NA	NA	NA	NA	NA	NA	NA
156	F80L absent	chr2	24299159	24299449	2.06206	-0.914531	51	5	1	24299186	24299208	CGGGTCCTGGATGTTGATGTCC	9.44e-05	120	2	SF3B14	9	-	protein_coding	7.10413	7.30597	7.22391	7.21062	-0.0162482	0.961281	FAM228B	92	+	protein_coding	1.66448	1.46989	1.64616	1.51096	-0.129609	0.872003	NA	NA	NA	NA	NA	NA	NA	NA	NA	NA	NA	NA	NA	NA
157	F80L absent	chr11	1276666	1277340	0.405256	-2.72838	79	8	NA	NA	NA	NA	NA	NA	0	NA	NA	NA	NA	NA	NA	NA	NA	NA	NA	NA	NA	NA	NA	NA	NA	NA	NA	NA	NA	NA	NA	NA	NA	NA	NA	NA	NA	NA	NA	NA	NA	NA	NA
158	F80L absent	chr4	88141690	88142025	3.76103	-0.982994	232	12	1	88141802	88141824	GGCACTCTGGGAAGTGTGGTTC	1.46e-09	1	0	NA	NA	NA	NA	NA	NA	NA	NA	NA	NA	NA	NA	NA	NA	NA	NA	NA	NA	NA	NA	NA	NA	NA	NA	NA	NA	NA	NA	NA	NA	NA	NA	NA	NA
159	F80L absent	chr1	228353361	228353590	0.99462	-3.3971	78	2	3	228353544	228353566	GCCACTCCGGGGCGCGGCGGCC	0.000994	117	2	IBA57-AS1	-262	-	ND	ND	ND	ND	ND	ND	ND	IBA57	41	+	protein_coding	1.93734	1.34483	1.56071	1.19535	-0.115436	0.796407	NA	NA	NA	NA	NA	NA	NA	NA	NA	NA	NA	NA	NA	NA
160	F80L absent	chr22	51221843	51222275	1.43647	-0.742961	94	12	NA	NA	NA	NA	NA	NA	1	RABL2B	32	-	protein_coding	2.53854	2.89724	2.65535	3.04089	0.0682874	0.912562	NA	NA	NA	NA	NA	NA	NA	NA	NA	NA	NA	NA	NA	NA	NA	NA	NA	NA	NA	NA	NA	NA	NA	NA
161	F80L absent	chr22	43539041	43539521	1.86794	-0.512168	104	21	1	43539321	43539343	GGTCGCACGGGTAGCGTGGGTC	0.000425	30	1	MCAT	119	-	protein_coding	4.18903	4.17871	3.90593	3.9514	-0.258208	0.295566	NA	NA	NA	NA	NA	NA	NA	NA	NA	NA	NA	NA	NA	NA	NA	NA	NA	NA	NA	NA	NA	NA	NA	NA
162	F80L absent	chr1	46768423	46768922	0.877143	-1.55459	85	11	NA	NA	NA	NA	NA	NA	0	NA	NA	NA	NA	NA	NA	NA	NA	NA	NA	NA	NA	NA	NA	NA	NA	NA	NA	NA	NA	NA	NA	NA	NA	NA	NA	NA	NA	NA	NA	NA	NA	NA	NA
163	F80L absent	chr19	35167901	35168957	4.16845	-0.361988	665	28	5	35168511	35168533	CGGCTTCCGGGACATTTGTACC	0.000398	6	2	AC020910.2	57	-	ND	ND	ND	ND	ND	ND	ND	ZNF302	115	+	protein_coding	4.58015	4.63343	4.70708	4.58436	-0.0084411	0.97818	NA	NA	NA	NA	NA	NA	NA	NA	NA	NA	NA	NA	NA	NA
164	F80L absent	chr5	495387	496129	0.675446	-2.2338	244	49	10	495575	495597	TGGAGCGTGGGGAGGGTCGGCG	0.000713	10	0	NA	NA	NA	NA	NA	NA	NA	NA	NA	NA	NA	NA	NA	NA	NA	NA	NA	NA	NA	NA	NA	NA	NA	NA	NA	NA	NA	NA	NA	NA	NA	NA	NA	NA
165	F80L absent	chr9	140082862	140083189	1.19033	-0.565148	132	28	5	140082933	140082955	TCCGGGCCGGGAGTCGCTGTCC	0.000214	85	2	ANAPC2	-36	-	protein_coding	4.73606	4.1334	4.0917	3.68706	-0.614805	0.0633157	SSNA1	74	+	protein_coding	6.50271	5.84021	5.854	5.34376	-0.62351	0.0975497	NA	NA	NA	NA	NA	NA	NA	NA	NA	NA	NA	NA	NA	NA
166	F80L absent	chr11	66138583	66139434	4.40933	-0.310191	725	29	5	66138880	66138902	GGGGTGATCGGGGTTGTAGTCC	3.82e-06	11	0	NA	NA	NA	NA	NA	NA	NA	NA	NA	NA	NA	NA	NA	NA	NA	NA	NA	NA	NA	NA	NA	NA	NA	NA	NA	NA	NA	NA	NA	NA	NA	NA	NA	NA
167	F80L absent	chr17	5014928	5015541	3.31521	-0.702178	264	13	2	5015194	5015216	AGGATTCTGGGAGTTGGAGGCC	6.75e-09	18	1	AC012146.7	-471	+	protein_coding	3.80219	3.28244	3.35614	3.22959	-0.297373	0.711544	NA	NA	NA	NA	NA	NA	NA	NA	NA	NA	NA	NA	NA	NA	NA	NA	NA	NA	NA	NA	NA	NA	NA	NA
168	F80L absent	chr14	70883577	70884008	3.30824	0.460417	88	3	2	70883832	70883854	GGAATGCTGGGAATCGTGGTTC	8.43e-09	9	2	SYNJ2BP-COX16	-91	-	protein_coding	4.72137	5.00675	4.01436	4.26903	-0.737856	0.141239	SYNJ2BP	-14	-	protein_coding	4.45878	4.393	4.27128	4.10434	-0.287382	0.183121	NA	NA	NA	NA	NA	NA	NA	NA	NA	NA	NA	NA	NA	NA
169	F80L absent	chr11	47198407	47198710	1.16222	-1.36629	53	9	NA	NA	NA	NA	NA	NA	1	ARFGAP2	118	-	protein_coding	4.75542	4.86592	5.00315	4.84348	-0.0288072	0.925367	NA	NA	NA	NA	NA	NA	NA	NA	NA	NA	NA	NA	NA	NA	NA	NA	NA	NA	NA	NA	NA	NA	NA	NA
170	F80L absent	chr22	30752468	30753094	3.32506	-1.07051	257	11	2	30752597	30752619	AGCCTCTTGGGACTTGCAGTCC	1.1e-07	78	2	CCDC157	-157	+	ND	ND	ND	ND	ND	ND	ND	SF3A1	155	-	protein_coding	5.90857	5.80426	5.54689	5.89288	0.000471751	0.998883	NA	NA	NA	NA	NA	NA	NA	NA	NA	NA	NA	NA	NA	NA
171	F80L absent	chr16	89787251	89787633	1.22708	-0.798	66	7	NA	NA	NA	NA	NA	NA	1	VPS9D1	-48	-	ND	ND	ND	ND	ND	ND	ND	NA	NA	NA	NA	NA	NA	NA	NA	NA	NA	NA	NA	NA	NA	NA	NA	NA	NA	NA	NA	NA	NA	NA	NA
172	F80L absent	chr1	1623929	1624297	1.70448	-1.21091	67	10	NA	NA	NA	NA	NA	NA	1	SLC35E2B	54	-	protein_coding	3.97361	3.78136	3.97453	3.66107	-0.072958	0.826416	NA	NA	NA	NA	NA	NA	NA	NA	NA	NA	NA	NA	NA	NA	NA	NA	NA	NA	NA	NA	NA	NA	NA	NA
173	F80L absent	chr3	9004923	9005406	3.2126	-0.590511	142	9	2	9005191	9005213	AGCCTGCCGGAAGTTGTAGTAG	8.94e-07	40	1	RAD18	293	-	protein_coding	4.10266	4.23649	4.57107	4.41752	0.365005	0.0277163	NA	NA	NA	NA	NA	NA	NA	NA	NA	NA	NA	NA	NA	NA	NA	NA	NA	NA	NA	NA	NA	NA	NA	NA
174	F80L absent	chr20	60757727	60758346	1.48915	-2.37752	87	5	NA	NA	NA	NA	NA	NA	1	MTG2	49	+	protein_coding	4.81096	4.30961	4.62936	4.4363	-0.189843	0.636421	NA	NA	NA	NA	NA	NA	NA	NA	NA	NA	NA	NA	NA	NA	NA	NA	NA	NA	NA	NA	NA	NA	NA	NA
175	F80L absent	chr7	72349683	72350148	1.4298	-0.533064	51	11	NA	NA	NA	NA	NA	NA	1	POM121	21	+	protein_coding	2.854	2.98732	2.95977	3.0036	0.0405796	0.909626	NA	NA	NA	NA	NA	NA	NA	NA	NA	NA	NA	NA	NA	NA	NA	NA	NA	NA	NA	NA	NA	NA	NA	NA
176	F80L absent	chr14	104387774	104388087	1.94117	-1.34518	55	4	NA	NA	NA	NA	NA	NA	0	NA	NA	NA	NA	NA	NA	NA	NA	NA	NA	NA	NA	NA	NA	NA	NA	NA	NA	NA	NA	NA	NA	NA	NA	NA	NA	NA	NA	NA	NA	NA	NA	NA	NA
177	F80L absent	chr8	38239269	38240105	3.07469	-0.435795	416	37	4	38239855	38239877	CGCCTGCCGGGAAATGCAGTCC	6.6e-08	6	2	WHSC1L1	103	-	protein_coding	5.17153	5.2891	5.68398	5.87234	0.416517	0.000266939	RP11-350N15.5	195	+	ND	ND	ND	ND	ND	ND	ND	NA	NA	NA	NA	NA	NA	NA	NA	NA	NA	NA	NA	NA	NA
178	F80L absent	chr7	30811022	30811668	2.56894	-0.436542	204	19	4	30811333	30811355	CGCCTCGTGGGAAATGTAGTTT	4.42e-09	6	1	FAM188B	-312	+	protein_coding	1.42761	1.45943	1.7866	1.64155	0.235464	0.617089	NA	NA	NA	NA	NA	NA	NA	NA	NA	NA	NA	NA	NA	NA	NA	NA	NA	NA	NA	NA	NA	NA	NA	NA
179	F80L absent	chr17	617739	618137	1.22977	-1.15815	64	9	NA	NA	NA	NA	NA	NA	0	NA	NA	NA	NA	NA	NA	NA	NA	NA	NA	NA	NA	NA	NA	NA	NA	NA	NA	NA	NA	NA	NA	NA	NA	NA	NA	NA	NA	NA	NA	NA	NA	NA	NA
180	F80L absent	chr8	145653833	145654092	1.45851	-1.39941	76	9	NA	NA	NA	NA	NA	NA	1	VPS28	-31	-	protein_coding	5.5598	5.30378	5.37295	5.04571	-0.310285	0.403871	NA	NA	NA	NA	NA	NA	NA	NA	NA	NA	NA	NA	NA	NA	NA	NA	NA	NA	NA	NA	NA	NA	NA	NA
181	F80L absent	chr6	86303509	86304137	2.25362	-0.916199	162	14	3	86303920	86303942	AGCCCGCTGGGAACTGTAGTCT	6.47e-10	29	1	SNX14	51	-	protein_coding	5.61471	5.66306	5.28392	5.28873	-0.490734	0.000239477	NA	NA	NA	NA	NA	NA	NA	NA	NA	NA	NA	NA	NA	NA	NA	NA	NA	NA	NA	NA	NA	NA	NA	NA
182	F80L absent	chr5	177026880	177027128	2.86706	-2.13417	147	4	NA	NA	NA	NA	NA	NA	1	B4GALT7	97	+	protein_coding	3.15381	2.66676	2.30451	2.61589	-0.418185	0.343655	NA	NA	NA	NA	NA	NA	NA	NA	NA	NA	NA	NA	NA	NA	NA	NA	NA	NA	NA	NA	NA	NA	NA	NA
183	F80L absent	chr1	36022934	36023451	0.757868	-0.992422	56	12	NA	NA	NA	NA	NA	NA	2	NCDN	-118	+	protein_coding	4.16511	3.52982	3.44361	3.11603	-0.584174	0.0838455	KIAA0319L	359	-	protein_coding	4.54288	4.59872	4.75649	4.65535	0.0838426	0.716134	NA	NA	NA	NA	NA	NA	NA	NA	NA	NA	NA	NA	NA	NA
184	F80L absent	chr2	131851034	131851359	1.76962	-1.08285	59	3	NA	NA	NA	NA	NA	NA	1	FAM168B	-163	-	protein_coding	5.27724	5.06393	5.24375	5.05788	-0.0459035	0.868514	NA	NA	NA	NA	NA	NA	NA	NA	NA	NA	NA	NA	NA	NA	NA	NA	NA	NA	NA	NA	NA	NA	NA	NA
185	F80L absent	chr2	198364305	198364977	1.18788	-0.570697	61	18	NA	NA	NA	NA	NA	NA	2	HSPE1	77	+	protein_coding	7.97315	8.13525	8.22511	8.58961	0.261072	0.249882	HSPE1-MOB4	496	+	protein_coding	3.02148	2.98185	2.73985	2.76129	-0.268744	0.621407	NA	NA	NA	NA	NA	NA	NA	NA	NA	NA	NA	NA	NA	NA
186	F80L absent	chr11	664313	665436	1.45031	-2.76886	55	2	NA	NA	NA	NA	NA	NA	0	NA	NA	NA	NA	NA	NA	NA	NA	NA	NA	NA	NA	NA	NA	NA	NA	NA	NA	NA	NA	NA	NA	NA	NA	NA	NA	NA	NA	NA	NA	NA	NA	NA	NA
187	F80L absent	chr19	45394372	45394650	1.24901	-2.2503	49	2	NA	NA	NA	NA	NA	NA	1	CTB-129P6.4	-378	-	ND	ND	ND	ND	ND	ND	ND	NA	NA	NA	NA	NA	NA	NA	NA	NA	NA	NA	NA	NA	NA	NA	NA	NA	NA	NA	NA	NA	NA	NA	NA
188	F80L absent	chr1	1011668	1014564	0.68817	-2.00048	203	39	5	1012463	1012485	TCCGTGCCGGGAGGCTGAGGCT	0.000364	88	0	NA	NA	NA	NA	NA	NA	NA	NA	NA	NA	NA	NA	NA	NA	NA	NA	NA	NA	NA	NA	NA	NA	NA	NA	NA	NA	NA	NA	NA	NA	NA	NA	NA	NA
189	F80L absent	chr1	213188784	213189236	2.59117	-0.350828	77	10	3	213189141	213189163	GGCATGCTGGGAGGTGCAGTCT	5.51e-09	6	1	ANGEL2	158	-	protein_coding	5.0505	5.05745	5.28503	5.24375	0.151277	0.451821	NA	NA	NA	NA	NA	NA	NA	NA	NA	NA	NA	NA	NA	NA	NA	NA	NA	NA	NA	NA	NA	NA	NA	NA
190	F80L absent	chr6	111135716	111136099	0.961392	-2.26324	64	8	6	111135999	111136021	TGCGCCGCGGGAGTTCGAGGTA	0.00011	27	0	NA	NA	NA	NA	NA	NA	NA	NA	NA	NA	NA	NA	NA	NA	NA	NA	NA	NA	NA	NA	NA	NA	NA	NA	NA	NA	NA	NA	NA	NA	NA	NA	NA	NA
191	F80L absent	chr22	22337114	22337372	1.71253	-0.79563	78	11	NA	NA	NA	NA	NA	NA	1	TOP3B	-30	-	protein_coding	4.45022	4.58015	4.29866	4.32121	-0.577679	0.000650088	NA	NA	NA	NA	NA	NA	NA	NA	NA	NA	NA	NA	NA	NA	NA	NA	NA	NA	NA	NA	NA	NA	NA	NA
192	F80L absent	chr16	88889827	88890270	0.940988	-0.979296	54	11	NA	NA	NA	NA	NA	NA	0	NA	NA	NA	NA	NA	NA	NA	NA	NA	NA	NA	NA	NA	NA	NA	NA	NA	NA	NA	NA	NA	NA	NA	NA	NA	NA	NA	NA	NA	NA	NA	NA	NA	NA
193	F80L absent	chr5	177388585	177389707	0.381801	-1.10139	178	49	NA	NA	NA	NA	NA	NA	0	NA	NA	NA	NA	NA	NA	NA	NA	NA	NA	NA	NA	NA	NA	NA	NA	NA	NA	NA	NA	NA	NA	NA	NA	NA	NA	NA	NA	NA	NA	NA	NA	NA	NA
194	F80L absent	chr19	20162795	20163294	3.71149	-0.485427	126	5	6	20163020	20163042	GGGATTGTAGGTCCCGTAGCCT	0.000117	7	0	NA	NA	NA	NA	NA	NA	NA	NA	NA	NA	NA	NA	NA	NA	NA	NA	NA	NA	NA	NA	NA	NA	NA	NA	NA	NA	NA	NA	NA	NA	NA	NA	NA	NA
195	F80L absent	chr19	1848456	1848764	1.29313	-0.582568	78	15	NA	NA	NA	NA	NA	NA	1	REXO1	-158	-	protein_coding	3.30451	2.93168	2.66903	1.98185	-0.544876	0.259084	NA	NA	NA	NA	NA	NA	NA	NA	NA	NA	NA	NA	NA	NA	NA	NA	NA	NA	NA	NA	NA	NA	NA	NA
196	F80L absent	chr10	134363136	134363625	2.65097	-0.952521	51	9	NA	NA	NA	NA	NA	NA	0	NA	NA	NA	NA	NA	NA	NA	NA	NA	NA	NA	NA	NA	NA	NA	NA	NA	NA	NA	NA	NA	NA	NA	NA	NA	NA	NA	NA	NA	NA	NA	NA	NA	NA
197	F80L absent	chr11	64014747	64015377	3.84472	-0.22848	501	17	3	64015010	64015032	GGGCTTGTGGGAAACGGAGTCC	3.31e-08	14	0	NA	NA	NA	NA	NA	NA	NA	NA	NA	NA	NA	NA	NA	NA	NA	NA	NA	NA	NA	NA	NA	NA	NA	NA	NA	NA	NA	NA	NA	NA	NA	NA	NA	NA
198	F80L absent	chr20	62339125	62339521	1.97261	-1.00094	200	19	1	62339355	62339377	GGGCAGCCGGGAAGCGGAGCGC	5.36e-05	26	1	ARFRP1	54	-	protein_coding	4.12928	4.05745	4.17393	3.91552	-0.183353	0.673509	NA	NA	NA	NA	NA	NA	NA	NA	NA	NA	NA	NA	NA	NA	NA	NA	NA	NA	NA	NA	NA	NA	NA	NA
199	F80L absent	chr9	37753519	37754054	3.68128	-0.273711	243	9	2	37753736	37753758	GGCATTCTGGAAATTGTAGTTT	3.3e-10	22	1	TRMT10B	18	+	protein_coding	2.80323	2.93923	2.07039	1.8953	-0.833262	0.00231798	NA	NA	NA	NA	NA	NA	NA	NA	NA	NA	NA	NA	NA	NA	NA	NA	NA	NA	NA	NA	NA	NA	NA	NA
200	F80L absent	chr11	43902153	43902502	2.2716	-0.902703	81	8	2	43902342	43902364	CGCGGCCTGTGATTGGGAGTTG	0.000392	61	2	RP11-613D13.5	-51	-	ND	ND	ND	ND	ND	ND	ND	ALKBH3	34	+	protein_coding	4.99186	5.15381	5.15056	5.30049	0.0992464	0.798528	NA	NA	NA	NA	NA	NA	NA	NA	NA	NA	NA	NA	NA	NA
201	F80L absent	chr5	34915612	34915864	1.58383	-2.6549	74	2	1	34915996	34916018	TGCAAGGTAGGAGGGGATGTCC	0.000225	216	1	BRIX1	-257	+	protein_coding	7.47695	7.5529	7.47857	7.54682	-0.025974	0.924514	NA	NA	NA	NA	NA	NA	NA	NA	NA	NA	NA	NA	NA	NA	NA	NA	NA	NA	NA	NA	NA	NA	NA	NA
202	F80L absent	chr14	105957215	105957694	1.66957	-0.629357	90	8	1	105957363	105957385	GGTTCCCCTGGAGTTTGAGTGT	0.000407	232	0	NA	NA	NA	NA	NA	NA	NA	NA	NA	NA	NA	NA	NA	NA	NA	NA	NA	NA	NA	NA	NA	NA	NA	NA	NA	NA	NA	NA	NA	NA	NA	NA	NA	NA
203	F80L absent	chr13	31191825	31192245	2.52359	-0.883211	112	10	4	31191991	31192013	TGCACGCTGGGCCTGAAAGGAC	0.000361	33	2	HMGB1	-301	-	protein_coding	9.18938	9.23336	9.16867	9.21776	-0.00263476	0.988606	USPL1	-205	+	protein_coding	4.05485	4.12516	4.33056	4.22342	0.19784	0.265115	NA	NA	NA	NA	NA	NA	NA	NA	NA	NA	NA	NA	NA	NA
204	F80L absent	chr20	1447377	1447711	2.09415	-0.806252	75	6	2	1447361	1447383	GGCCGGCTGGGACTTGCAGGTA	2.97e-06	190	0	NA	NA	NA	NA	NA	NA	NA	NA	NA	NA	NA	NA	NA	NA	NA	NA	NA	NA	NA	NA	NA	NA	NA	NA	NA	NA	NA	NA	NA	NA	NA	NA	NA	NA
205	F80L absent	chr16	31022017	31022304	2.45335	-0.161544	106	14	2	31022209	31022231	GGCCCGGGGGGTGGGGTGGCCC	0.000314	19	1	STX1B	-211	-	ND	ND	ND	ND	ND	ND	ND	NA	NA	NA	NA	NA	NA	NA	NA	NA	NA	NA	NA	NA	NA	NA	NA	NA	NA	NA	NA	NA	NA	NA	NA
206	F80L absent	chr5	132113006	132113705	3.65322	-0.5115	534	40	2	132113115	132113137	GGACTGCTGGGACTTGTAGTCC	4.61e-10	4	0	NA	NA	NA	NA	NA	NA	NA	NA	NA	NA	NA	NA	NA	NA	NA	NA	NA	NA	NA	NA	NA	NA	NA	NA	NA	NA	NA	NA	NA	NA	NA	NA	NA	NA
207	F80L absent	chr7	63767492	63768055	2.651	0.226592	124	15	5	63767795	63767817	CGCATGCTGGGATTGTAATACT	0.000349	24	1	ZNF736	64	+	protein_coding	2.72683	2.8679	3.08236	2.92979	0.348377	0.0770701	NA	NA	NA	NA	NA	NA	NA	NA	NA	NA	NA	NA	NA	NA	NA	NA	NA	NA	NA	NA	NA	NA	NA	NA
208	F80L absent	chr1	182758422	182759113	4.28789	0.183236	851	35	3	182758818	182758840	GGGAGCCTGGGGGTTGTAGTTC	2.09e-08	13	1	NPL	-339	+	protein_coding	2.13093	2.28983	1.51602	0.400538	-1.83655	3.29892e-07	NA	NA	NA	NA	NA	NA	NA	NA	NA	NA	NA	NA	NA	NA	NA	NA	NA	NA	NA	NA	NA	NA	NA	NA
209	F80L absent	chr1	1015913	1016469	1.09574	-2.76211	79	1	NA	NA	NA	NA	NA	NA	0	NA	NA	NA	NA	NA	NA	NA	NA	NA	NA	NA	NA	NA	NA	NA	NA	NA	NA	NA	NA	NA	NA	NA	NA	NA	NA	NA	NA	NA	NA	NA	NA	NA	NA
210	F80L absent	chr2	15731833	15732206	2.16809	-1.31465	67	5	3	15731947	15731969	TGGTCTTCGGCGTTCGGAGTCC	0.000856	47	0	NA	NA	NA	NA	NA	NA	NA	NA	NA	NA	NA	NA	NA	NA	NA	NA	NA	NA	NA	NA	NA	NA	NA	NA	NA	NA	NA	NA	NA	NA	NA	NA	NA	NA
211	F80L absent	chr17	45727009	45727382	1.5559	-1.07541	69	8	1	45727298	45727320	GGGAGGCTGTGAGTGAGAGGCG	0.00059	63	2	RP11-580I16.2	-409	-	ND	ND	ND	ND	ND	ND	ND	KPNB1	-353	+	protein_coding	8.58327	8.56392	8.5575	8.54805	-0.0470416	0.765188	NA	NA	NA	NA	NA	NA	NA	NA	NA	NA	NA	NA	NA	NA
212	F80L absent	chr8	145133244	145134000	4.13512	-0.265645	635	32	8	145133559	145133581	GAGCCGCCGGGAGCTGTAGTTC	2.11e-07	1	2	EXOSC4	-93	+	protein_coding	4.57531	3.95791	3.75382	3.3505	-0.720658	0.0701146	CTD-3065J16.9	546	-	ND	ND	ND	ND	ND	ND	ND	NA	NA	NA	NA	NA	NA	NA	NA	NA	NA	NA	NA	NA	NA
213	F80L absent	chr19	45582363	45582651	2.06393	-1.19256	97	8	1	45582294	45582316	GGGCGTCTGGGATGCCCATTTT	0.000233	185	2	GEMIN7	-54	+	protein_coding	5.03342	4.59335	4.62	4.42694	-0.295164	0.300624	MARK4	39	+	protein_coding	2.47768	2.75275	2.81967	3.15866	0.0887471	0.866112	NA	NA	NA	NA	NA	NA	NA	NA	NA	NA	NA	NA	NA	NA
214	F80L absent	chr7	99869716	99870496	3.22614	-0.416802	346	31	2	99869897	99869919	GGCCTGCCAGGACTTGTAGTCC	4.97e-08	3	2	GATS	-269	-	pseudogene	3.12102	2.73335	2.5656	2.4489	-0.191986	0.666746	GATS	-251	-	pseudogene	3.12102	2.73335	2.5656	2.4489	-0.191986	0.666746	NA	NA	NA	NA	NA	NA	NA	NA	NA	NA	NA	NA	NA	NA
215	F80L absent	chr6	168758099	168759730	0.460417	-2.00043	174	17	NA	NA	NA	NA	NA	NA	0	NA	NA	NA	NA	NA	NA	NA	NA	NA	NA	NA	NA	NA	NA	NA	NA	NA	NA	NA	NA	NA	NA	NA	NA	NA	NA	NA	NA	NA	NA	NA	NA	NA	NA
216	F80L absent	chr7	1977371	1978139	0.873327	-2.06369	87	3	NA	NA	NA	NA	NA	NA	0	NA	NA	NA	NA	NA	NA	NA	NA	NA	NA	NA	NA	NA	NA	NA	NA	NA	NA	NA	NA	NA	NA	NA	NA	NA	NA	NA	NA	NA	NA	NA	NA	NA	NA
217	F80L absent	chr12	121124539	121124864	2.19916	-0.335853	76	12	6	121124683	121124705	GGCCGCCTGGGCGCTGCACCCG	0.000621	10	1	MLEC	-29	+	protein_coding	5.44758	5.55244	5.78921	5.76792	0.128766	0.419127	NA	NA	NA	NA	NA	NA	NA	NA	NA	NA	NA	NA	NA	NA	NA	NA	NA	NA	NA	NA	NA	NA	NA	NA
218	F80L absent	chr1	2323039	2323340	2.08117	-3.36058	69	0	NA	NA	NA	NA	NA	NA	2	MORN1	-43	-	protein_coding	2.07724	2.64616	1.91073	2.22342	-0.338411	0.542938	RER1	78	+	protein_coding	5.58767	5.76102	5.91073	5.86171	-0.00235457	0.992747	NA	NA	NA	NA	NA	NA	NA	NA	NA	NA	NA	NA	NA	NA
219	F80L absent	chr11	67981116	67981487	1.0318	-2.03872	55	4	NA	NA	NA	NA	NA	NA	1	SUV420H1	-6	-	protein_coding	4.11353	4.10936	4.29572	4.48478	0.199907	0.268361	NA	NA	NA	NA	NA	NA	NA	NA	NA	NA	NA	NA	NA	NA	NA	NA	NA	NA	NA	NA	NA	NA	NA	NA
220	F80L absent	chr3	183903598	183903950	2.55359	-1.22004	117	7	3	183903714	183903736	TGCCTTCTGGGAGGTGGAGTTC	8.54e-10	14	1	ABCF3	37	+	protein_coding	4.33271	4.3875	4.34767	4.60407	-0.0265252	0.939532	NA	NA	NA	NA	NA	NA	NA	NA	NA	NA	NA	NA	NA	NA	NA	NA	NA	NA	NA	NA	NA	NA	NA	NA
221	F80L absent	chr12	1799867	1800266	2.21299	-1.22239	98	2	2	1800034	1800056	TGCATCGTGGGAGCTGTGGTTC	2.25e-08	2	0	NA	NA	NA	NA	NA	NA	NA	NA	NA	NA	NA	NA	NA	NA	NA	NA	NA	NA	NA	NA	NA	NA	NA	NA	NA	NA	NA	NA	NA	NA	NA	NA	NA	NA
222	F80L absent	chr22	19419865	19420156	1.51965	-0.93791	80	8	NA	NA	NA	NA	NA	NA	0	NA	NA	NA	NA	NA	NA	NA	NA	NA	NA	NA	NA	NA	NA	NA	NA	NA	NA	NA	NA	NA	NA	NA	NA	NA	NA	NA	NA	NA	NA	NA	NA	NA	NA
223	F80L absent	chr11	61197241	61197618	2.4758	-0.56485	84	15	1	61197484	61197506	CGCATGCCGGAAGTGGCGGTGC	8.86e-05	78	2	CPSF7	74	-	protein_coding	4.78607	5.08151	5.06134	5.23573	0.192944	0.514638	SDHAF2	85	+	protein_coding	3.9855	3.99277	3.9982	3.95233	-0.137306	0.735418	NA	NA	NA	NA	NA	NA	NA	NA	NA	NA	NA	NA	NA	NA
224	F80L absent	chr12	125324247	125324828	0.76063	-2.18122	104	12	1	125324180	125324202	TGTGCCGTTGGGAATGTAGGAT	0.000813	101	0	NA	NA	NA	NA	NA	NA	NA	NA	NA	NA	NA	NA	NA	NA	NA	NA	NA	NA	NA	NA	NA	NA	NA	NA	NA	NA	NA	NA	NA	NA	NA	NA	NA	NA
225	F80L absent	chr1	203240235	203240496	3.28079	0.282677	52	3	1	203240353	203240375	AGGAGACTGGGAAATGCAGTCT	4.75e-07	15	0	NA	NA	NA	NA	NA	NA	NA	NA	NA	NA	NA	NA	NA	NA	NA	NA	NA	NA	NA	NA	NA	NA	NA	NA	NA	NA	NA	NA	NA	NA	NA	NA	NA	NA
226	F80L absent	chr22	20748054	20748843	3.82162	-0.300604	429	18	6	20748389	20748411	ACGCTCCCGGGAGGTGTAGTTT	1.85e-07	13	1	ZNF74	-43	+	protein_coding	3.24031	2.85599	2.27202	2.01436	-0.8853	0.000173953	NA	NA	NA	NA	NA	NA	NA	NA	NA	NA	NA	NA	NA	NA	NA	NA	NA	NA	NA	NA	NA	NA	NA	NA
227	F80L absent	chr2	73461469	73461883	1.97506	-1.27546	79	5	2	73461749	73461771	AGCACCCTGGGACTTGTAGTCC	5.81e-10	84	0	NA	NA	NA	NA	NA	NA	NA	NA	NA	NA	NA	NA	NA	NA	NA	NA	NA	NA	NA	NA	NA	NA	NA	NA	NA	NA	NA	NA	NA	NA	NA	NA	NA	NA
228	F80L absent	chr2	242705287	242707042	1.40056	-1.55565	108	1	6	242706865	242706887	AGAAGTTGGGGAGATGGGAGCC	0.000782	85	0	NA	NA	NA	NA	NA	NA	NA	NA	NA	NA	NA	NA	NA	NA	NA	NA	NA	NA	NA	NA	NA	NA	NA	NA	NA	NA	NA	NA	NA	NA	NA	NA	NA	NA
229	F80L absent	chr12	64936731	64936990	1.61391	-0.288345	88	20	2	64936689	64936711	AGTCTGCAGGGAGGTGTGGAGG	0.000283	180	0	NA	NA	NA	NA	NA	NA	NA	NA	NA	NA	NA	NA	NA	NA	NA	NA	NA	NA	NA	NA	NA	NA	NA	NA	NA	NA	NA	NA	NA	NA	NA	NA	NA	NA
230	F80L absent	chr15	75639517	75640181	3.35328	-0.153897	419	20	2	75639899	75639921	GAGCCGCTGGGAGGTGTAGTCC	4.37e-08	18	1	NEIL1	-553	+	protein_coding	3.34199	3.49697	1.70929	2.10434	-1.21331	1.2406e-05	NA	NA	NA	NA	NA	NA	NA	NA	NA	NA	NA	NA	NA	NA	NA	NA	NA	NA	NA	NA	NA	NA	NA	NA
231	F80L absent	chr17	7232315	7233070	0.976143	-0.835944	86	9	NA	NA	NA	NA	NA	NA	1	NEURL4	20	-	protein_coding	4.58676	4.50208	4.69153	4.57833	-0.163437	0.562321	NA	NA	NA	NA	NA	NA	NA	NA	NA	NA	NA	NA	NA	NA	NA	NA	NA	NA	NA	NA	NA	NA	NA	NA
232	F80L absent	chr9	34988797	34989398	2.49706	0.206155	107	9	3	34989173	34989195	TGCACTCTGGGAGGTGTAGTCC	2.08e-10	21	1	DNAJB5	541	+	ND	ND	ND	ND	ND	ND	ND	NA	NA	NA	NA	NA	NA	NA	NA	NA	NA	NA	NA	NA	NA	NA	NA	NA	NA	NA	NA	NA	NA	NA	NA
233	F80L absent	chr12	49454157	49455137	3.0252	-0.174832	298	29	NA	NA	NA	NA	NA	NA	0	NA	NA	NA	NA	NA	NA	NA	NA	NA	NA	NA	NA	NA	NA	NA	NA	NA	NA	NA	NA	NA	NA	NA	NA	NA	NA	NA	NA	NA	NA	NA	NA	NA	NA
234	F80L absent	chr16	85191629	85192250	2.57301	-0.682702	126	7	4	85191789	85191811	GGAAGCCTGGGAAATGTAGTTT	5.18e-09	12	0	NA	NA	NA	NA	NA	NA	NA	NA	NA	NA	NA	NA	NA	NA	NA	NA	NA	NA	NA	NA	NA	NA	NA	NA	NA	NA	NA	NA	NA	NA	NA	NA	NA	NA
235	F80L absent	chr8	37887617	37888313	3.76463	-0.387415	346	19	4	37887954	37887976	ACGCCCCTGGGATTTGTAGTCC	5.25e-08	7	1	EIF4EBP1	-106	+	protein_coding	5.65821	5.43563	4.96671	5.08364	-0.58391	0.0127502	NA	NA	NA	NA	NA	NA	NA	NA	NA	NA	NA	NA	NA	NA	NA	NA	NA	NA	NA	NA	NA	NA	NA	NA
236	F80L absent	chr7	2030273	2031960	1.395	-2.34701	88	0	NA	NA	NA	NA	NA	NA	0	NA	NA	NA	NA	NA	NA	NA	NA	NA	NA	NA	NA	NA	NA	NA	NA	NA	NA	NA	NA	NA	NA	NA	NA	NA	NA	NA	NA	NA	NA	NA	NA	NA	NA
237	F80L absent	chr19	54057035	54057402	1.99936	-1.99691	87	1	6	54057279	54057301	TGCATGCTGGGACACGGGGCTT	2.24e-06	18	0	NA	NA	NA	NA	NA	NA	NA	NA	NA	NA	NA	NA	NA	NA	NA	NA	NA	NA	NA	NA	NA	NA	NA	NA	NA	NA	NA	NA	NA	NA	NA	NA	NA	NA
238	F80L absent	chr19	7616021	7616906	3.13855	-0.398525	395	32	7	7616374	7616396	AGCATGCTGGGAGGGAAGCCTT	0.000256	14	0	NA	NA	NA	NA	NA	NA	NA	NA	NA	NA	NA	NA	NA	NA	NA	NA	NA	NA	NA	NA	NA	NA	NA	NA	NA	NA	NA	NA	NA	NA	NA	NA	NA	NA
239	F80L absent	chr2	27994460	27994973	2.38553	-0.646873	121	9	2	27994802	27994824	GGCATGCCGGACGCTGTGGTCC	5.07e-06	13	1	MRPL33	-132	+	protein_coding	6.49665	6.8515	6.76421	7.17931	0.256114	0.543723	NA	NA	NA	NA	NA	NA	NA	NA	NA	NA	NA	NA	NA	NA	NA	NA	NA	NA	NA	NA	NA	NA	NA	NA
240	F80L absent	chr12	109490224	109490561	2.45531	-0.166201	70	13	5	109490329	109490351	GTCCCCCTGGGAGCTGTCCTGC	3.6e-05	26	0	NA	NA	NA	NA	NA	NA	NA	NA	NA	NA	NA	NA	NA	NA	NA	NA	NA	NA	NA	NA	NA	NA	NA	NA	NA	NA	NA	NA	NA	NA	NA	NA	NA	NA
241	F80L absent	chr14	96968234	96968872	3.23631	-0.109389	280	19	2	96968633	96968655	AGCCTCACGGGAAGCGGAGTTC	5.97e-07	37	1	RP11-872J21.3	105	-	ND	ND	ND	ND	ND	ND	ND	NA	NA	NA	NA	NA	NA	NA	NA	NA	NA	NA	NA	NA	NA	NA	NA	NA	NA	NA	NA	NA	NA	NA	NA
242	F80L absent	chr16	54962907	54963457	3.0485	0.627723	189	20	2	54963232	54963254	GGGCTCTCGGAGAATGTAGTCT	2.89e-06	16	1	CRNDE	-81	-	lincRNA	5.31216	5.59842	5.39917	5.2114	-0.165432	0.681402	NA	NA	NA	NA	NA	NA	NA	NA	NA	NA	NA	NA	NA	NA	NA	NA	NA	NA	NA	NA	NA	NA	NA	NA
243	F80L absent	chr17	5389821	5390224	1.76391	-0.73543	81	11	3	5390118	5390140	TGCATGCTGGGATCTTCAGGTC	3.92e-06	12	2	MIS12	-417	+	protein_coding	4.86691	4.98368	5.16752	5.05441	0.128121	0.533817	DERL2	109	-	protein_coding	5.21607	5.66107	5.32445	5.61383	-0.0447473	0.91131	NA	NA	NA	NA	NA	NA	NA	NA	NA	NA	NA	NA	NA	NA
244	F80L absent	chr5	443027	443354	1.11032	-2.31774	88	5	2	443255	443277	CCGTTGCCGGAAGCGGAAGTGC	0.000899	47	2	C5orf55	68	-	protein_coding	2.59216	2.29572	1.66903	1.55582	-0.864055	0.0165199	EXOC3	83	+	protein_coding	5.13299	4.8339	4.80426	4.71149	-0.274455	0.257226	NA	NA	NA	NA	NA	NA	NA	NA	NA	NA	NA	NA	NA	NA
245	F80L absent	chr19	49404028	49404891	2.27031	-1.69504	144	7	4	49404466	49404488	GTGCTACTGGGAAATGTAGTTT	2.31e-08	25	0	NA	NA	NA	NA	NA	NA	NA	NA	NA	NA	NA	NA	NA	NA	NA	NA	NA	NA	NA	NA	NA	NA	NA	NA	NA	NA	NA	NA	NA	NA	NA	NA	NA	NA
246	F80L absent	chr22	19131975	19132517	2.44936	-0.314357	128	11	1	19132312	19132334	GACTTTATTGGAAATGTAGTCC	1.63e-06	31	1	DGCR14	-49	-	protein_coding	3.49442	2.91839	2.90689	2.46205	-0.395728	0.310711	NA	NA	NA	NA	NA	NA	NA	NA	NA	NA	NA	NA	NA	NA	NA	NA	NA	NA	NA	NA	NA	NA	NA	NA
247	F80L absent	chr11	47429834	47430095	2.1744	-1.80368	104	3	1	47429922	47429944	GGGCCGGAGGGGAGGGTCGGTC	0.000766	77	0	NA	NA	NA	NA	NA	NA	NA	NA	NA	NA	NA	NA	NA	NA	NA	NA	NA	NA	NA	NA	NA	NA	NA	NA	NA	NA	NA	NA	NA	NA	NA	NA	NA	NA
248	F80L absent	chr10	104180837	104181203	1.72705	-1.62576	78	4	2	104181014	104181036	CCGCTCTTGGGAGCTGGGGCGC	0.000443	92	1	PSD	276	-	ND	ND	ND	ND	ND	ND	ND	NA	NA	NA	NA	NA	NA	NA	NA	NA	NA	NA	NA	NA	NA	NA	NA	NA	NA	NA	NA	NA	NA	NA	NA
249	F80L absent	chr16	30968911	30969240	1.37729	-1.03747	91	10	NA	NA	NA	NA	NA	NA	0	NA	NA	NA	NA	NA	NA	NA	NA	NA	NA	NA	NA	NA	NA	NA	NA	NA	NA	NA	NA	NA	NA	NA	NA	NA	NA	NA	NA	NA	NA	NA	NA	NA	NA
250	F80L absent	chr5	561928	564792	0.233149	-1.8486	226	44	NA	NA	NA	NA	NA	NA	0	NA	NA	NA	NA	NA	NA	NA	NA	NA	NA	NA	NA	NA	NA	NA	NA	NA	NA	NA	NA	NA	NA	NA	NA	NA	NA	NA	NA	NA	NA	NA	NA	NA	NA
251	F80L absent	chr14	76127374	76127862	1.87386	0	90	6	1	76127595	76127617	TGCTTGTTGGTTGTTGTAGTAA	3.82e-05	14	1	C14orf1	-86	-	protein_coding	3.09592	3.23419	2.6017	2.80941	-0.477871	0.0719839	NA	NA	NA	NA	NA	NA	NA	NA	NA	NA	NA	NA	NA	NA	NA	NA	NA	NA	NA	NA	NA	NA	NA	NA
252	F80L absent	chr10	43133901	43134285	2.2488	-1.30388	100	5	2	43134111	43134133	GTCCTCACGGGAAAGGTAGTTT	6.22e-07	19	2	ZNF33B	-77	-	protein_coding	2.29278	2.02857	2.06695	1.5509	-0.403357	0.512764	ZNF33B	-101	-	protein_coding	2.29278	2.02857	2.06695	1.5509	-0.403357	0.512764	NA	NA	NA	NA	NA	NA	NA	NA	NA	NA	NA	NA	NA	NA
253	F80L absent	chr6	56911150	56911717	2.855	-1.02365	115	4	5	56911293	56911315	AGGATGCTGGGATGGTAGTTCC	0.000237	17	1	KIAA1586	-86	+	protein_coding	4.26828	4.43496	4.41549	4.41954	-0.0516386	0.85723	NA	NA	NA	NA	NA	NA	NA	NA	NA	NA	NA	NA	NA	NA	NA	NA	NA	NA	NA	NA	NA	NA	NA	NA
254	F80L absent	chr16	85832945	85833371	1.4838	-1.61982	72	2	3	85833096	85833118	TGGAGTCTGGGGCTGCGGCTTC	0.000475	64	1	EMC8	56	-	protein_coding	4.488	4.69265	4.18903	4.35685	-0.541508	0.00173007	NA	NA	NA	NA	NA	NA	NA	NA	NA	NA	NA	NA	NA	NA	NA	NA	NA	NA	NA	NA	NA	NA	NA	NA
255	F80L absent	chr16	578186	578416	1.21893	-0.57043	31	8	NA	NA	NA	NA	NA	NA	0	NA	NA	NA	NA	NA	NA	NA	NA	NA	NA	NA	NA	NA	NA	NA	NA	NA	NA	NA	NA	NA	NA	NA	NA	NA	NA	NA	NA	NA	NA	NA	NA	NA	NA
256	F80L absent	chr12	56660412	56660842	3.46766	-0.459862	154	17	3	56660602	56660624	CGCCTGTCGGGAGATGTAGTTT	2.72e-08	14	1	COQ10A	15	+	protein_coding	3.77294	4.07296	2.68482	3.04439	-1.10145	4.0277e-05	NA	NA	NA	NA	NA	NA	NA	NA	NA	NA	NA	NA	NA	NA	NA	NA	NA	NA	NA	NA	NA	NA	NA	NA
257	F80L absent	chr11	64863563	64863891	2.73741	-0.69601	72	8	2	64863563	64863585	AGGTGCGGGGGAACTCTAGTCT	8.79e-05	82	0	NA	NA	NA	NA	NA	NA	NA	NA	NA	NA	NA	NA	NA	NA	NA	NA	NA	NA	NA	NA	NA	NA	NA	NA	NA	NA	NA	NA	NA	NA	NA	NA	NA	NA
258	F80L absent	chr3	180852492	180852727	3.30718	0	21	0	NA	NA	NA	NA	NA	NA	0	NA	NA	NA	NA	NA	NA	NA	NA	NA	NA	NA	NA	NA	NA	NA	NA	NA	NA	NA	NA	NA	NA	NA	NA	NA	NA	NA	NA	NA	NA	NA	NA	NA	NA
259	F80L absent	chr19	49588446	49588897	1.53223	-1.5044	104	8	2	49588475	49588497	CGGAAAGCGGGAGGTGGAGGGG	0.000944	153	1	SNRNP70	5	+	protein_coding	7.55987	7.5404	7.46932	7.69579	-0.132581	0.622286	NA	NA	NA	NA	NA	NA	NA	NA	NA	NA	NA	NA	NA	NA	NA	NA	NA	NA	NA	NA	NA	NA	NA	NA
260	F80L absent	chr15	74907879	74908250	1.80424	-1.39106	135	16	2	74907999	74908021	GGCCCTCCCGGAACTAGTCTCC	0.000588	46	1	CTD-3154N5.1	-127	-	ND	ND	ND	ND	ND	ND	ND	NA	NA	NA	NA	NA	NA	NA	NA	NA	NA	NA	NA	NA	NA	NA	NA	NA	NA	NA	NA	NA	NA	NA	NA
261	F80L absent	chr3	75690134	75690740	4.07187	0.457717	281	16	5	75690326	75690348	GTCTTGCTGGGAGATGCAGTCT	2.43e-07	43	0	NA	NA	NA	NA	NA	NA	NA	NA	NA	NA	NA	NA	NA	NA	NA	NA	NA	NA	NA	NA	NA	NA	NA	NA	NA	NA	NA	NA	NA	NA	NA	NA	NA	NA
262	F80L absent	chr2	234475190	234475588	2.4704	-1.15289	68	5	NA	NA	NA	NA	NA	NA	1	USP40	39	-	protein_coding	3.08746	3.0072	3.37851	3.2032	0.0451206	0.901283	NA	NA	NA	NA	NA	NA	NA	NA	NA	NA	NA	NA	NA	NA	NA	NA	NA	NA	NA	NA	NA	NA	NA	NA
263	F80L absent	chr5	17101094	17101981	0.599493	-0.586772	47	23	NA	NA	NA	NA	NA	NA	0	NA	NA	NA	NA	NA	NA	NA	NA	NA	NA	NA	NA	NA	NA	NA	NA	NA	NA	NA	NA	NA	NA	NA	NA	NA	NA	NA	NA	NA	NA	NA	NA	NA	NA
264	F80L absent	chr20	60961759	60962227	1.6465	-2.12685	82	6	NA	NA	NA	NA	NA	NA	1	RPS21	179	+	protein_coding	10.0882	9.85184	9.60537	9.58763	-0.404263	0.00367697	NA	NA	NA	NA	NA	NA	NA	NA	NA	NA	NA	NA	NA	NA	NA	NA	NA	NA	NA	NA	NA	NA	NA	NA
265	F80L absent	chr21	47705961	47706371	2.15858	-0.822839	108	18	2	47706076	47706098	GGCAGCGCGGGCCTCGGGGTCC	0.000172	76	2	MCM3AP	45	-	protein_coding	5.9404	5.77584	5.98277	5.85549	-0.0203498	0.937206	YBEY	85	+	protein_coding	4.10769	4.03914	3.84197	4.05224	-0.116608	0.81263	NA	NA	NA	NA	NA	NA	NA	NA	NA	NA	NA	NA	NA	NA
266	F80L absent	chr19	55606388	55607462	2.46046	-0.749733	164	23	6	55607053	55607075	GGGCTGATGGGAATTGTAGTTT	2.12e-10	9	0	NA	NA	NA	NA	NA	NA	NA	NA	NA	NA	NA	NA	NA	NA	NA	NA	NA	NA	NA	NA	NA	NA	NA	NA	NA	NA	NA	NA	NA	NA	NA	NA	NA	NA
267	F80L absent	chr17	17991068	17991355	1.24279	-1.178	56	9	NA	NA	NA	NA	NA	NA	1	DRG2	-11	+	protein_coding	4.65592	4.5097	4.91456	4.60644	0.166694	0.457831	NA	NA	NA	NA	NA	NA	NA	NA	NA	NA	NA	NA	NA	NA	NA	NA	NA	NA	NA	NA	NA	NA	NA	NA
268	F80L absent	chr2	60926504	60926896	1.83103	-1.0039	99	9	3	60926667	60926689	TTGAACCCAGGAGGTGGAGGTT	0.00043	5	0	NA	NA	NA	NA	NA	NA	NA	NA	NA	NA	NA	NA	NA	NA	NA	NA	NA	NA	NA	NA	NA	NA	NA	NA	NA	NA	NA	NA	NA	NA	NA	NA	NA	NA
269	F80L absent	chr16	23607464	23607792	1.3931	-1.67572	50	4	NA	NA	NA	NA	NA	NA	1	NDUFAB1	49	-	protein_coding	6.48752	6.59634	6.7046	6.56849	0.0581195	0.84043	NA	NA	NA	NA	NA	NA	NA	NA	NA	NA	NA	NA	NA	NA	NA	NA	NA	NA	NA	NA	NA	NA	NA	NA
270	F80L absent	chr5	137878616	137879035	1.11784	-1.5639	57	5	NA	NA	NA	NA	NA	NA	1	ETF1	164	-	protein_coding	7.01725	7.16229	7.07168	7.09244	-0.0139508	0.952719	NA	NA	NA	NA	NA	NA	NA	NA	NA	NA	NA	NA	NA	NA	NA	NA	NA	NA	NA	NA	NA	NA	NA	NA
271	F80L absent	chr17	81163131	81163932	2.68276	-0.758538	82	18	NA	NA	NA	NA	NA	NA	0	NA	NA	NA	NA	NA	NA	NA	NA	NA	NA	NA	NA	NA	NA	NA	NA	NA	NA	NA	NA	NA	NA	NA	NA	NA	NA	NA	NA	NA	NA	NA	NA	NA	NA
272	F80L absent	chr7	1900994	1901267	0.0540702	-1.6556	106	14	2	1900985	1901007	TGGCCCTTGTGGCCTTTAGTCC	0.000341	85	0	NA	NA	NA	NA	NA	NA	NA	NA	NA	NA	NA	NA	NA	NA	NA	NA	NA	NA	NA	NA	NA	NA	NA	NA	NA	NA	NA	NA	NA	NA	NA	NA	NA	NA
273	F80L absent	chr22	24951649	24952002	1.70123	-0.95858	60	6	3	24951942	24951964	GGAATTCTGGGTGTTAGGCCCG	0.000425	51	2	SNRPD3	-354	+	protein_coding	7.6367	7.71019	7.43012	7.70335	-0.163249	0.543238	GUCD1	78	-	protein_coding	5.09887	4.86196	4.81301	4.6565	-0.395634	0.029227	NA	NA	NA	NA	NA	NA	NA	NA	NA	NA	NA	NA	NA	NA
274	F80L absent	chr7	102212895	102213131	0.949901	-1.56739	93	18	NA	NA	NA	NA	NA	NA	1	POLR2J3	90	-	protein_coding	5.62322	5.72083	5.85549	5.96578	-0.0232911	0.946128	NA	NA	NA	NA	NA	NA	NA	NA	NA	NA	NA	NA	NA	NA	NA	NA	NA	NA	NA	NA	NA	NA	NA	NA
275	F80L absent	chr10	132505741	132506011	3.37042	-0.622072	46	1	3	132505854	132505876	GGGCGGCTGGGAAATGTAGTTC	9.01e-10	9	0	NA	NA	NA	NA	NA	NA	NA	NA	NA	NA	NA	NA	NA	NA	NA	NA	NA	NA	NA	NA	NA	NA	NA	NA	NA	NA	NA	NA	NA	NA	NA	NA	NA	NA
276	F80L absent	chr17	25603622	25604041	3.69188	0	63	8	NA	NA	NA	NA	NA	NA	0	NA	NA	NA	NA	NA	NA	NA	NA	NA	NA	NA	NA	NA	NA	NA	NA	NA	NA	NA	NA	NA	NA	NA	NA	NA	NA	NA	NA	NA	NA	NA	NA	NA	NA
277	F80L absent	chr19	58330780	58331128	2.20901	-0.788864	82	13	1	58330979	58331001	AGCTTTCTGAGTAATGTAGTTG	1.19e-06	36	2	CTD-2583A14.10	133	+	protein_coding	1.67807	0.400538	0.400538	-0.184425	-1.03756	0.524126	ZNF587B	145	+	protein_coding	3.64386	3.46597	3.90497	3.68594	0.230582	0.380896	NA	NA	NA	NA	NA	NA	NA	NA	NA	NA	NA	NA	NA	NA
278	F80L absent	chr14	105282314	105282570	1.441	-0.552618	75	6	1	105282200	105282222	AGGCGGGTGGGAGGAGCAGGCC	6.37e-05	241	0	NA	NA	NA	NA	NA	NA	NA	NA	NA	NA	NA	NA	NA	NA	NA	NA	NA	NA	NA	NA	NA	NA	NA	NA	NA	NA	NA	NA	NA	NA	NA	NA	NA	NA
279	F80L absent	chr19	29295530	29296049	1.88452	0	14	0	NA	NA	NA	NA	NA	NA	0	NA	NA	NA	NA	NA	NA	NA	NA	NA	NA	NA	NA	NA	NA	NA	NA	NA	NA	NA	NA	NA	NA	NA	NA	NA	NA	NA	NA	NA	NA	NA	NA	NA	NA
280	F80L absent	chr20	55966137	55966419	3.59251	-0.474786	164	10	2	55966339	55966361	GGACCGCCGGGAAGCGTAGTTC	9.5e-08	58	1	RBM38	185	+	protein_coding	3.51854	2.58256	3.30451	3.04264	0.0168939	0.983111	NA	NA	NA	NA	NA	NA	NA	NA	NA	NA	NA	NA	NA	NA	NA	NA	NA	NA	NA	NA	NA	NA	NA	NA
281	F80L absent	chr1	3560409	3561139	0.130178	-3.49972	97	2	NA	NA	NA	NA	NA	NA	0	NA	NA	NA	NA	NA	NA	NA	NA	NA	NA	NA	NA	NA	NA	NA	NA	NA	NA	NA	NA	NA	NA	NA	NA	NA	NA	NA	NA	NA	NA	NA	NA	NA	NA
282	F80L absent	chr12	31881847	31882436	3.34647	-0.160913	166	28	4	31882195	31882217	AACGTGACGGGAGTTGTAGTTC	4.12e-07	2	1	AMN1	-33	-	protein_coding	2.34483	2.69599	2.60407	2.69599	-0.127358	0.811527	NA	NA	NA	NA	NA	NA	NA	NA	NA	NA	NA	NA	NA	NA	NA	NA	NA	NA	NA	NA	NA	NA	NA	NA
283	F80L absent	chr10	95462204	95462552	2.70688	-0.800156	65	10	NA	NA	NA	NA	NA	NA	1	FRA10AC1	-49	-	protein_coding	4.92505	4.70487	4.83188	4.9241	0.00847389	0.982153	NA	NA	NA	NA	NA	NA	NA	NA	NA	NA	NA	NA	NA	NA	NA	NA	NA	NA	NA	NA	NA	NA	NA	NA
284	F80L absent	chr19	15217824	15218153	3.97258	0	127	8	5	15218040	15218062	GCGATGCTGGGAGATGTAGTTG	1.73e-08	22	1	SYDE1	226	+	protein_coding	2.74631	2.12102	1.32769	1.21412	-1.26675	8.11703e-05	NA	NA	NA	NA	NA	NA	NA	NA	NA	NA	NA	NA	NA	NA	NA	NA	NA	NA	NA	NA	NA	NA	NA	NA
285	F80L absent	chr3	112709549	112709912	2.27391	-0.271986	72	6	3	112709745	112709767	CGCCTGCTGGGAGTTGTTGTCT	7.13e-09	23	2	RP11-484K9.4	270	-	ND	ND	ND	ND	ND	ND	ND	GTPBP8	35	+	protein_coding	4.28318	4.22033	4.43696	4.44559	0.0891551	0.775741	NA	NA	NA	NA	NA	NA	NA	NA	NA	NA	NA	NA	NA	NA
286	F80L absent	chr16	21610651	21611008	2.02926	-0.86635	109	11	1	21610732	21610754	GGGCCGCTGGGAGGCGGGACAA	0.000755	79	0	NA	NA	NA	NA	NA	NA	NA	NA	NA	NA	NA	NA	NA	NA	NA	NA	NA	NA	NA	NA	NA	NA	NA	NA	NA	NA	NA	NA	NA	NA	NA	NA	NA	NA
287	F80L absent	chr1	10706318	10707171	2.81958	0	200	25	5	10706602	10706624	GGCACCCTGCATATTGCAATCC	0.000944	0	0	NA	NA	NA	NA	NA	NA	NA	NA	NA	NA	NA	NA	NA	NA	NA	NA	NA	NA	NA	NA	NA	NA	NA	NA	NA	NA	NA	NA	NA	NA	NA	NA	NA	NA
288	F80L absent	chr7	1609583	1609877	1.46173	-1.44711	52	4	NA	NA	NA	NA	NA	NA	1	PSMG3-AS1	-21	+	ND	ND	ND	ND	ND	ND	ND	NA	NA	NA	NA	NA	NA	NA	NA	NA	NA	NA	NA	NA	NA	NA	NA	NA	NA	NA	NA	NA	NA	NA	NA
289	F80L absent	chr10	105110482	105111217	3.56583	-0.0793762	589	28	2	105110919	105110941	GGCTCGCCGGGAAATGTGGTTT	3.53e-08	6	1	PCGF6	42	-	protein_coding	4.88411	4.85798	5.02148	4.76447	-0.0258543	0.93934	NA	NA	NA	NA	NA	NA	NA	NA	NA	NA	NA	NA	NA	NA	NA	NA	NA	NA	NA	NA	NA	NA	NA	NA
290	F80L absent	chr9	134164676	134165538	3.00977	-0.234665	375	31	5	134165027	134165049	GGGACTCTGGGAAATGTAGTCC	4.75e-11	9	1	PPAPDC3	-26	+	ND	ND	ND	ND	ND	ND	ND	NA	NA	NA	NA	NA	NA	NA	NA	NA	NA	NA	NA	NA	NA	NA	NA	NA	NA	NA	NA	NA	NA	NA	NA
291	F80L absent	chrX	49091773	49092230	3.10598	-0.461266	164	14	4	49091868	49091890	TAGCTGCTGGGAACTGTAGTTC	1.57e-08	32	1	CCDC22	-74	+	protein_coding	2.95047	2.66676	-1.12029	-1.12029	-3.98291	1.41663e-37	NA	NA	NA	NA	NA	NA	NA	NA	NA	NA	NA	NA	NA	NA	NA	NA	NA	NA	NA	NA	NA	NA	NA	NA
292	F80L absent	chr5	175792158	175793035	3.35763	-0.203605	604	44	7	175792432	175792454	TGCATTGTGGGGCTTGTAGTGC	8.06e-08	10	1	ARL10	-125	+	protein_coding	-0.184425	1.16993	-0.943416	-0.888969	-1.47947	0.00325426	NA	NA	NA	NA	NA	NA	NA	NA	NA	NA	NA	NA	NA	NA	NA	NA	NA	NA	NA	NA	NA	NA	NA	NA
293	F80L absent	chr3	197463356	197464075	3.87687	0	554	30	5	197463793	197463815	TGCTCGCCGGGGGCTGTAGTCC	2.55e-07	14	1	FYTTD1	335	+	protein_coding	5.65507	5.47411	5.6605	5.39541	-0.0593886	0.799502	NA	NA	NA	NA	NA	NA	NA	NA	NA	NA	NA	NA	NA	NA	NA	NA	NA	NA	NA	NA	NA	NA	NA	NA
294	F80L absent	chr17	655403	655641	1.01658	-2.44697	51	3	NA	NA	NA	NA	NA	NA	0	NA	NA	NA	NA	NA	NA	NA	NA	NA	NA	NA	NA	NA	NA	NA	NA	NA	NA	NA	NA	NA	NA	NA	NA	NA	NA	NA	NA	NA	NA	NA	NA	NA	NA
295	F80L absent	chr16	2732329	2732614	2.27579	-1.00727	103	11	2	2732398	2732420	TGCTTTTCGGGACCGGAACTTC	5.77e-05	60	1	KCTD5	5	+	protein_coding	3.73335	3.48027	3.69377	3.66562	-0.0327866	0.938338	NA	NA	NA	NA	NA	NA	NA	NA	NA	NA	NA	NA	NA	NA	NA	NA	NA	NA	NA	NA	NA	NA	NA	NA
296	F80L absent	chr19	4723693	4723981	1.38484	-0.81077	83	17	4	4723762	4723784	GCCACTTCCGGGGTCGCAGTCC	0.000752	81	0	NA	NA	NA	NA	NA	NA	NA	NA	NA	NA	NA	NA	NA	NA	NA	NA	NA	NA	NA	NA	NA	NA	NA	NA	NA	NA	NA	NA	NA	NA	NA	NA	NA	NA
297	F80L absent	chr13	111364765	111365538	2.75755	-0.32429	261	24	3	111365289	111365311	AGGCTGCTGGGAGTGGTGGTCC	1.38e-08	1	1	ING1	-68	+	protein_coding	3.02857	2.65992	2.80735	2.90111	0.0805515	0.836866	NA	NA	NA	NA	NA	NA	NA	NA	NA	NA	NA	NA	NA	NA	NA	NA	NA	NA	NA	NA	NA	NA	NA	NA
298	F80L absent	chr19	36036128	36036791	4.1065	-0.0984485	814	50	4	36036488	36036510	GACCTTCTGGGAGCAGTAGTCC	9.81e-08	12	2	AD000090.2	472	-	antisense	3.20789	3.25248	2.84398	2.7845	-0.353331	0.0944903	TMEM147	38	+	protein_coding	6.19002	6.17652	6.90761	6.98982	0.742349	8.0742e-10	NA	NA	NA	NA	NA	NA	NA	NA	NA	NA	NA	NA	NA	NA
299	F80L absent	chr19	37406763	37407476	3.13445	-0.268308	319	32	6	37406984	37407006	GGCCCTCTGGGAAATGTAGTCC	1.88e-11	20	2	ZNF829	74	-	protein_coding	1.72247	1.59932	1.18269	1.1375	-0.597206	0.0215262	ZNF568	112	+	protein_coding	2.28688	2.36177	1.37851	1.69599	-0.746429	0.00676058	NA	NA	NA	NA	NA	NA	NA	NA	NA	NA	NA	NA	NA	NA
300	F80L absent	chr9	136202936	136203185	1.48081	-1.72935	91	7	1	136202900	136202922	GGCCGAATGGGAGCAGATCTTC	0.000395	175	1	SURF6	175	-	protein_coding	4.96347	4.21257	4.33771	4.1035	-0.441136	0.275075	NA	NA	NA	NA	NA	NA	NA	NA	NA	NA	NA	NA	NA	NA	NA	NA	NA	NA	NA	NA	NA	NA	NA	NA
301	F80L absent	chr17	26544210	26544443	2.0918	-0.821372	46	12	NA	NA	NA	NA	NA	NA	0	NA	NA	NA	NA	NA	NA	NA	NA	NA	NA	NA	NA	NA	NA	NA	NA	NA	NA	NA	NA	NA	NA	NA	NA	NA	NA	NA	NA	NA	NA	NA	NA	NA	NA
302	F80L absent	chr1	228768624	228773720	0.595446	-1.40852	987	250	NA	NA	NA	NA	NA	NA	3	RNA5S11	-2676	-	ND	ND	ND	ND	ND	ND	ND	RNA5S12	-436	-	ND	ND	ND	ND	ND	ND	ND	RNA5S13	1789	-	ND	ND	ND	ND	ND	ND	ND	NA	NA	NA	NA
303	F80L absent	chr3	12598381	12598745	2.04374	-1.42768	65	7	NA	NA	NA	NA	NA	NA	1	MKRN2	-50	+	protein_coding	4.46532	4.53169	4.56742	4.58556	0.130083	0.538459	NA	NA	NA	NA	NA	NA	NA	NA	NA	NA	NA	NA	NA	NA	NA	NA	NA	NA	NA	NA	NA	NA	NA	NA
304	F80L absent	chr1	180471592	180472098	1.37603	-1.61883	60	7	NA	NA	NA	NA	NA	NA	1	ACBD6	244	-	protein_coding	5.77584	5.71973	5.94743	6.08576	0.0753927	0.78062	NA	NA	NA	NA	NA	NA	NA	NA	NA	NA	NA	NA	NA	NA	NA	NA	NA	NA	NA	NA	NA	NA	NA	NA
305	F80L absent	chr3	75834482	75834966	2.36336	-1.13629	87	6	2	75834701	75834723	CCGCCTCTGGGTGCCGCACTTC	0.000401	51	1	ZNF717	10	-	protein_coding	1.88753	2.18903	1.03562	0.948601	-1.01825	0.00237766	NA	NA	NA	NA	NA	NA	NA	NA	NA	NA	NA	NA	NA	NA	NA	NA	NA	NA	NA	NA	NA	NA	NA	NA
306	F80L absent	chr11	68671237	68671536	2.19265	-0.874469	93	9	1	68671383	68671405	GGGCCCCTAGAAGCCGACGTCC	0.000536	47	2	MRPL21	-83	-	protein_coding	5.86196	6.04963	5.94767	6.01659	-0.00933548	0.98187	IGHMBP2	-76	+	protein_coding	3.27053	3.19849	3.36177	3.09761	-0.146704	0.715665	NA	NA	NA	NA	NA	NA	NA	NA	NA	NA	NA	NA	NA	NA
307	F80L absent	chr15	102292763	102296405	0.563155	-1.72095	109	18	NA	NA	NA	NA	NA	NA	0	NA	NA	NA	NA	NA	NA	NA	NA	NA	NA	NA	NA	NA	NA	NA	NA	NA	NA	NA	NA	NA	NA	NA	NA	NA	NA	NA	NA	NA	NA	NA	NA	NA	NA
308	F80L absent	chr19	49486314	49487534	1.96397	-0.515615	250	39	5	49486850	49486872	GCGCTGATGGGGGTTGTAGTTT	1.83e-07	26	0	NA	NA	NA	NA	NA	NA	NA	NA	NA	NA	NA	NA	NA	NA	NA	NA	NA	NA	NA	NA	NA	NA	NA	NA	NA	NA	NA	NA	NA	NA	NA	NA	NA	NA
309	F80L absent	chr10	80292869	80293133	2.46366	-0.718229	23	2	NA	NA	NA	NA	NA	NA	0	NA	NA	NA	NA	NA	NA	NA	NA	NA	NA	NA	NA	NA	NA	NA	NA	NA	NA	NA	NA	NA	NA	NA	NA	NA	NA	NA	NA	NA	NA	NA	NA	NA	NA
310	F80L absent	chrX	54385038	54385518	1.97616	-2.55227	81	3	2	54385212	54385234	TGTACCCTGGGAATTGTAGTTT	1.58e-09	60	1	WNK3	-203	-	protein_coding	2.35896	2.28392	2.21723	2.21101	-0.113412	0.656727	NA	NA	NA	NA	NA	NA	NA	NA	NA	NA	NA	NA	NA	NA	NA	NA	NA	NA	NA	NA	NA	NA	NA	NA
311	F80L absent	chr3	124508555	124509428	1.31762	-1.8606	28	0	NA	NA	NA	NA	NA	NA	0	NA	NA	NA	NA	NA	NA	NA	NA	NA	NA	NA	NA	NA	NA	NA	NA	NA	NA	NA	NA	NA	NA	NA	NA	NA	NA	NA	NA	NA	NA	NA	NA	NA	NA
312	F80L absent	chr1	45278780	45279724	2.75454	-0.0866744	358	39	5	45279497	45279519	AGCACTTCGGGAGCTGTAGTTT	3.24e-08	13	0	NA	NA	NA	NA	NA	NA	NA	NA	NA	NA	NA	NA	NA	NA	NA	NA	NA	NA	NA	NA	NA	NA	NA	NA	NA	NA	NA	NA	NA	NA	NA	NA	NA	NA
313	F80L absent	chr3	98312293	98312744	3.25387	0.0576694	258	21	2	98312512	98312534	GGCGCGCTGGGAGCTGTAGTCC	3.68e-09	4	1	CPOX	49	-	protein_coding	4.56194	4.55275	3.88264	3.89821	-0.761814	7.25491e-08	NA	NA	NA	NA	NA	NA	NA	NA	NA	NA	NA	NA	NA	NA	NA	NA	NA	NA	NA	NA	NA	NA	NA	NA
314	F80L absent	chr19	49122404	49122781	1.92636	-1.28184	60	6	NA	NA	NA	NA	NA	NA	2	SPHK2	-44	+	protein_coding	2.46989	1.53107	1.9486	1.62293	-0.447173	0.576671	RPL18	201	-	protein_coding	10.363	9.99406	9.88478	9.72503	-0.445702	0.0189774	NA	NA	NA	NA	NA	NA	NA	NA	NA	NA	NA	NA	NA	NA
315	F80L absent	chr8	144897838	144898271	4.29347	0.385981	571	34	6	144897966	144897988	GGCCTTCTGGGGGCCGCAGTCC	4.32e-07	9	0	NA	NA	NA	NA	NA	NA	NA	NA	NA	NA	NA	NA	NA	NA	NA	NA	NA	NA	NA	NA	NA	NA	NA	NA	NA	NA	NA	NA	NA	NA	NA	NA	NA	NA
316	F80L absent	chr1	52521541	52522234	2.6776	-0.216117	223	24	3	52521858	52521880	AGCAGGCGGGGCGTTGGAGTTC	5.72e-06	0	2	TXNDC12	-44	-	protein_coding	5.31615	5.43363	5.47476	5.70072	0.233235	0.265832	BTF3L4	-90	+	protein_coding	6.04418	6.3572	6.1983	6.19357	-0.0964147	0.723499	NA	NA	NA	NA	NA	NA	NA	NA	NA	NA	NA	NA	NA	NA
317	F80L absent	chr7	72978732	72978965	1.61441	-0.608561	63	11	NA	NA	NA	NA	NA	NA	0	NA	NA	NA	NA	NA	NA	NA	NA	NA	NA	NA	NA	NA	NA	NA	NA	NA	NA	NA	NA	NA	NA	NA	NA	NA	NA	NA	NA	NA	NA	NA	NA	NA	NA
318	F80L absent	chr11	118306811	118307237	2.90495	-0.335657	185	11	2	118307002	118307024	TGACGCCTGGGCGCTGCAACTC	0.000541	51	1	KMT2A	181	+	protein_coding	3.17792	3.57773	3.2032	3.65191	0.0412366	0.931652	NA	NA	NA	NA	NA	NA	NA	NA	NA	NA	NA	NA	NA	NA	NA	NA	NA	NA	NA	NA	NA	NA	NA	NA
319	F80L absent	chr2	27579592	27580132	3.68447	0.346635	257	18	3	27579870	27579892	GGCCTCATGGGAGTTGCAGTGT	1.05e-07	3	1	GTF3C2	6	-	protein_coding	5.06566	5.0343	5.06738	5.0018	-0.15119	0.371281	NA	NA	NA	NA	NA	NA	NA	NA	NA	NA	NA	NA	NA	NA	NA	NA	NA	NA	NA	NA	NA	NA	NA	NA
320	F80L absent	chr9	132079601	132080117	1.86256	-0.638044	130	20	2	132079962	132079984	GGGAGGCTGGGAAATGCAGTCC	3.75e-08	5	0	NA	NA	NA	NA	NA	NA	NA	NA	NA	NA	NA	NA	NA	NA	NA	NA	NA	NA	NA	NA	NA	NA	NA	NA	NA	NA	NA	NA	NA	NA	NA	NA	NA	NA
321	F80L absent	chr10	17243449	17243824	1.62241	-1.67388	54	4	NA	NA	NA	NA	NA	NA	1	TRDMT1	417	-	protein_coding	2.71589	2.87578	2.42492	2.69599	0.0119222	0.979077	NA	NA	NA	NA	NA	NA	NA	NA	NA	NA	NA	NA	NA	NA	NA	NA	NA	NA	NA	NA	NA	NA	NA	NA
322	F80L absent	chr17	26684443	26684799	1.96274	-2.01215	100	5	2	26684740	26684762	CCCCGGCGGGGAGCTGGAGCCA	0.000905	142	3	POLDIP2	-76	-	protein_coding	6.16511	6.11458	6.13689	6.11249	-0.0366304	0.860787	TMEM199	-17	+	protein_coding	4.12019	4.05311	4.15056	4.21335	0.164178	0.487834	CTB-96E2.3	49	+	ND	ND	ND	ND	ND	ND	ND	NA	NA	NA	NA
323	F80L absent	chr6	6737323	6737904	2.90193	-0.209149	90	7	3	6737592	6737614	TGCATGCTGGGACTTGTAGTCT	6.75e-11	21	0	NA	NA	NA	NA	NA	NA	NA	NA	NA	NA	NA	NA	NA	NA	NA	NA	NA	NA	NA	NA	NA	NA	NA	NA	NA	NA	NA	NA	NA	NA	NA	NA	NA	NA
324	F80L absent	chr19	44952453	44952893	2.16233	-0.403072	78	8	4	44952701	44952723	AGGGTTCTGGGAAAGGTAGTCC	9.1e-09	27	2	CTC-512J12.4	-33	-	ND	ND	ND	ND	ND	ND	ND	ZNF229	93	-	protein_coding	1.39506	1.45943	-0.0439433	-0.286304	-1.59506	4.6917e-09	NA	NA	NA	NA	NA	NA	NA	NA	NA	NA	NA	NA	NA	NA
325	F80L absent	chr11	134709212	134710161	1.37373	-1.79141	111	10	NA	NA	NA	NA	NA	NA	0	NA	NA	NA	NA	NA	NA	NA	NA	NA	NA	NA	NA	NA	NA	NA	NA	NA	NA	NA	NA	NA	NA	NA	NA	NA	NA	NA	NA	NA	NA	NA	NA	NA	NA
326	F80L absent	chr16	790922	791214	1.45177	-1.12003	68	9	NA	NA	NA	NA	NA	NA	1	NARFL	261	-	protein_coding	3.39506	3.3505	3.55459	3.37156	-0.299645	0.482959	NA	NA	NA	NA	NA	NA	NA	NA	NA	NA	NA	NA	NA	NA	NA	NA	NA	NA	NA	NA	NA	NA	NA	NA
327	F80L absent	chr17	66031419	66031758	2.49896	-0.13245	78	7	1	66031515	66031537	TGCTTGACGGGATCTGGAGTCC	6.67e-07	21	1	KPNA2	47	+	protein_coding	8.06571	8.13026	8.31184	8.39124	0.228347	0.0686275	NA	NA	NA	NA	NA	NA	NA	NA	NA	NA	NA	NA	NA	NA	NA	NA	NA	NA	NA	NA	NA	NA	NA	NA
328	F80L absent	chr11	64609408	64609872	2.01822	-0.563466	79	10	6	64609648	64609670	GGGCTGATGGGACTTGTAGTCC	1.37e-09	2	0	NA	NA	NA	NA	NA	NA	NA	NA	NA	NA	NA	NA	NA	NA	NA	NA	NA	NA	NA	NA	NA	NA	NA	NA	NA	NA	NA	NA	NA	NA	NA	NA	NA	NA
329	F80L absent	chr17	17512410	17512738	2.73757	-0.568041	52	5	4	17512600	17512622	GGGGCCCTGGGAAATGGAGTCT	3.81e-08	16	0	NA	NA	NA	NA	NA	NA	NA	NA	NA	NA	NA	NA	NA	NA	NA	NA	NA	NA	NA	NA	NA	NA	NA	NA	NA	NA	NA	NA	NA	NA	NA	NA	NA	NA
330	F80L absent	chr12	119861125	119861366	3.55383	0.294246	26	3	NA	NA	NA	NA	NA	NA	0	NA	NA	NA	NA	NA	NA	NA	NA	NA	NA	NA	NA	NA	NA	NA	NA	NA	NA	NA	NA	NA	NA	NA	NA	NA	NA	NA	NA	NA	NA	NA	NA	NA	NA
331	F80L absent	chr16	86395761	86396228	1.82592	-0.378245	97	12	6	86396026	86396048	GACAGGCTGGGTATGGTGGCTC	4.78e-05	7	0	NA	NA	NA	NA	NA	NA	NA	NA	NA	NA	NA	NA	NA	NA	NA	NA	NA	NA	NA	NA	NA	NA	NA	NA	NA	NA	NA	NA	NA	NA	NA	NA	NA	NA
332	F80L absent	chr21	9968329	9968768	2.52112	-0.566347	84	6	4	9968673	9968695	AGCCTCATAGGAAATGTAGTGT	3.7e-07	26	1	TEKT4P2	37	-	pseudogene	1.70044	0.933573	1.18269	1.04264	-0.222306	0.816372	NA	NA	NA	NA	NA	NA	NA	NA	NA	NA	NA	NA	NA	NA	NA	NA	NA	NA	NA	NA	NA	NA	NA	NA
333	F80L absent	chr8	63951150	63951859	4.01638	0.467949	480	29	4	63951444	63951466	GGGCCTATGGGAAATGCAGTCC	3.94e-08	14	1	GGH	226	-	protein_coding	5.85972	5.88166	5.39917	5.04789	-0.683825	1.24234e-05	NA	NA	NA	NA	NA	NA	NA	NA	NA	NA	NA	NA	NA	NA	NA	NA	NA	NA	NA	NA	NA	NA	NA	NA
334	F80L absent	chr9	102056868	102057198	2.89327	-0.964119	51	3	NA	NA	NA	NA	NA	NA	0	NA	NA	NA	NA	NA	NA	NA	NA	NA	NA	NA	NA	NA	NA	NA	NA	NA	NA	NA	NA	NA	NA	NA	NA	NA	NA	NA	NA	NA	NA	NA	NA	NA	NA
335	F80L absent	chr11	117186818	117187265	3.33573	-0.424166	172	16	3	117187013	117187035	GGATCGCTGGGAAGTGTAGTCT	1.25e-08	4	1	BACE1	-66	-	protein_coding	3.36457	3.36457	2.24184	2.16027	-1.03101	6.08778e-13	NA	NA	NA	NA	NA	NA	NA	NA	NA	NA	NA	NA	NA	NA	NA	NA	NA	NA	NA	NA	NA	NA	NA	NA
336	F80L absent	chr22	40766085	40767015	2.32513	-0.1413	333	49	3	40766548	40766570	GTCATGCTGGGGGCTGTAGTCG	3.97e-07	38	1	SGSM3	45	+	protein_coding	5.02989	4.29278	4.65306	4.27128	-0.0744869	0.873847	NA	NA	NA	NA	NA	NA	NA	NA	NA	NA	NA	NA	NA	NA	NA	NA	NA	NA	NA	NA	NA	NA	NA	NA
337	F80L absent	chr16	3450696	3451529	2.99294	-0.127982	273	24	4	3451060	3451082	TGCATCCCGGGAGCTGCAGTCC	7.01e-08	16	2	ZSCAN32	-47	-	protein_coding	3.20163	3.19061	3.40735	3.44626	0.355594	0.11143	ZNF174	123	+	protein_coding	2.74201	2.61117	3.18745	3.34908	0.626318	0.0276346	NA	NA	NA	NA	NA	NA	NA	NA	NA	NA	NA	NA	NA	NA
338	F80L absent	chr8	38325870	38326563	4.3605	0.0348158	567	35	3	38326227	38326249	TGCCTGCTGGGCCTTGTAGTTC	7.13e-09	21	1	FGFR1	136	-	protein_coding	4.98094	5.08236	4.7939	4.79233	-0.442634	0.000677248	NA	NA	NA	NA	NA	NA	NA	NA	NA	NA	NA	NA	NA	NA	NA	NA	NA	NA	NA	NA	NA	NA	NA	NA
339	F80L absent	chr2	55844486	55845084	2.44368	-0.933511	81	5	NA	NA	NA	NA	NA	NA	1	RP11-554J4.1	259	+	antisense	0.757023	1.11103	1.51096	0.678072	0.171922	0.934949	NA	NA	NA	NA	NA	NA	NA	NA	NA	NA	NA	NA	NA	NA	NA	NA	NA	NA	NA	NA	NA	NA	NA	NA
340	F80L absent	chr3	53381485	53381832	2.18336	-1.6849	85	6	2	53381772	53381794	TGCGTAGTGGAGCTTGCAGGCT	0.000451	89	1	DCP1A	-4	-	protein_coding	3.32337	3.40327	3.58256	3.58256	0.162367	0.434659	NA	NA	NA	NA	NA	NA	NA	NA	NA	NA	NA	NA	NA	NA	NA	NA	NA	NA	NA	NA	NA	NA	NA	NA
341	F80L absent	chr9	115774103	115774719	3.06217	0	179	14	3	115774510	115774532	AAGATGCTGGGAAATGTAGTTC	3.86e-09	5	1	ZNF883	96	-	lincRNA	3.19692	3.32481	-0.888969	-0.785875	-4.14105	3.81374e-56	NA	NA	NA	NA	NA	NA	NA	NA	NA	NA	NA	NA	NA	NA	NA	NA	NA	NA	NA	NA	NA	NA	NA	NA
342	F80L absent	chr5	137829459	137829669	1.86491	0.278122	42	15	1	137829519	137829541	AGGATTGTGGGTAATGCAGTCC	2.73e-07	10	0	NA	NA	NA	NA	NA	NA	NA	NA	NA	NA	NA	NA	NA	NA	NA	NA	NA	NA	NA	NA	NA	NA	NA	NA	NA	NA	NA	NA	NA	NA	NA	NA	NA	NA
343	F80L absent	chr9	130007252	130007732	3.11913	-0.182748	176	10	1	130007464	130007486	TGCACTGCGGGCCTTGCAGTCT	8.24e-06	13	0	NA	NA	NA	NA	NA	NA	NA	NA	NA	NA	NA	NA	NA	NA	NA	NA	NA	NA	NA	NA	NA	NA	NA	NA	NA	NA	NA	NA	NA	NA	NA	NA	NA	NA
344	F80L absent	chr1	150039519	150039988	3.54784	0	214	15	4	150039762	150039784	ACGGTGCTGGGAGTTGTAGTTC	2.31e-08	1	1	VPS45	-384	+	protein_coding	4.93687	4.9991	5.18626	5.10056	0.128011	0.555381	NA	NA	NA	NA	NA	NA	NA	NA	NA	NA	NA	NA	NA	NA	NA	NA	NA	NA	NA	NA	NA	NA	NA	NA
345	F80L absent	chr16	740237	740553	2.66471	-1.26989	74	11	2	740253	740275	GGGTTCCTGGGAGCGGCGCAGT	0.000983	209	1	WDR24	49	-	protein_coding	2.15056	1.23879	1.5008	1.07724	-0.613258	0.400661	NA	NA	NA	NA	NA	NA	NA	NA	NA	NA	NA	NA	NA	NA	NA	NA	NA	NA	NA	NA	NA	NA	NA	NA
346	F80L absent	chr8	38240348	38240589	1.50015	-1.11618	61	7	NA	NA	NA	NA	NA	NA	0	NA	NA	NA	NA	NA	NA	NA	NA	NA	NA	NA	NA	NA	NA	NA	NA	NA	NA	NA	NA	NA	NA	NA	NA	NA	NA	NA	NA	NA	NA	NA	NA	NA	NA
347	F80L absent	chr3	127770971	127771210	2.76434	-0.256775	143	13	3	127771102	127771124	GGGCTCCTGGGGCCTGTCGGGA	0.000118	5	0	NA	NA	NA	NA	NA	NA	NA	NA	NA	NA	NA	NA	NA	NA	NA	NA	NA	NA	NA	NA	NA	NA	NA	NA	NA	NA	NA	NA	NA	NA	NA	NA	NA	NA
348	F80L absent	chr13	19711342	19711962	1.72818	-0.197871	74	21	NA	NA	NA	NA	NA	NA	0	NA	NA	NA	NA	NA	NA	NA	NA	NA	NA	NA	NA	NA	NA	NA	NA	NA	NA	NA	NA	NA	NA	NA	NA	NA	NA	NA	NA	NA	NA	NA	NA	NA	NA
349	F80L absent	chr1	27648479	27648840	2.69495	-0.155111	104	14	3	27648609	27648631	TCACTTCCCGGAGATGGGGTCC	6.48e-05	8	1	TMEM222	-8	+	protein_coding	3.82985	3.65421	3.68032	3.44758	-0.190061	0.556951	NA	NA	NA	NA	NA	NA	NA	NA	NA	NA	NA	NA	NA	NA	NA	NA	NA	NA	NA	NA	NA	NA	NA	NA
350	F80L absent	chr19	55677076	55677796	3.45221	0.147304	411	34	5	55677506	55677528	AGTATTCTGGGATTCGCAGTCC	2.68e-07	8	0	NA	NA	NA	NA	NA	NA	NA	NA	NA	NA	NA	NA	NA	NA	NA	NA	NA	NA	NA	NA	NA	NA	NA	NA	NA	NA	NA	NA	NA	NA	NA	NA	NA	NA
351	F80L absent	chr19	5719911	5720254	1.05757	-0.305503	62	22	NA	NA	NA	NA	NA	NA	0	NA	NA	NA	NA	NA	NA	NA	NA	NA	NA	NA	NA	NA	NA	NA	NA	NA	NA	NA	NA	NA	NA	NA	NA	NA	NA	NA	NA	NA	NA	NA	NA	NA	NA
352	common	chr1	235667765	235668025	5.60445	1.00691	1438	79	3	235667916	235667938	AGGCTCATGGGAAATGTGGTTT	1.95e-08	27	1	B3GALNT2	-114	-	protein_coding	4.71094	4.79025	5.06781	5.11811	0.257842	0.105469	NA	NA	NA	NA	NA	NA	NA	NA	NA	NA	NA	NA	NA	NA	NA	NA	NA	NA	NA	NA	NA	NA	NA	NA
353	F80L absent	chr17	61678133	61678557	1.71	-0.336049	62	11	NA	NA	NA	NA	NA	NA	1	TACO1	-114	+	protein_coding	4.67864	4.56621	4.61706	4.66221	-0.000170832	0.999329	NA	NA	NA	NA	NA	NA	NA	NA	NA	NA	NA	NA	NA	NA	NA	NA	NA	NA	NA	NA	NA	NA	NA	NA
354	F80L absent	chr14	104683197	104684205	1.57037	-2.75452	106	0	NA	NA	NA	NA	NA	NA	0	NA	NA	NA	NA	NA	NA	NA	NA	NA	NA	NA	NA	NA	NA	NA	NA	NA	NA	NA	NA	NA	NA	NA	NA	NA	NA	NA	NA	NA	NA	NA	NA	NA	NA
355	F80L absent	chr7	150777830	150778076	1.29199	-1.27308	55	6	NA	NA	NA	NA	NA	NA	1	FASTK	0	-	protein_coding	4.69933	4.09255	4.0917	3.61824	-0.404006	0.18311	NA	NA	NA	NA	NA	NA	NA	NA	NA	NA	NA	NA	NA	NA	NA	NA	NA	NA	NA	NA	NA	NA	NA	NA
356	F80L absent	chr12	112856546	112856920	1.14005	-1.98423	53	2	NA	NA	NA	NA	NA	NA	1	RPL6	-91	-	protein_coding	11.1708	11.2122	11.0543	11.2097	-0.0487252	0.859918	NA	NA	NA	NA	NA	NA	NA	NA	NA	NA	NA	NA	NA	NA	NA	NA	NA	NA	NA	NA	NA	NA	NA	NA
357	common	chr19	36208359	36208760	6.72132	1.8386	2636	157	6	36208464	36208486	GGCACCCTGGGAGTGGTAGTCC	1e-09	5	2	KMT2B	362	+	protein_coding	1.52607	1.48543	1.37295	1.73118	0.0449669	0.935234	KMT2B	362	+	protein_coding	1.52607	1.48543	1.37295	1.73118	0.0449669	0.935234	NA	NA	NA	NA	NA	NA	NA	NA	NA	NA	NA	NA	NA	NA
358	F80L absent	chr11	67084939	67085557	3.2194	-0.0896651	275	25	3	67085253	67085275	GGCACGCTGGGAAATGTGGTTT	7.46e-10	20	0	NA	NA	NA	NA	NA	NA	NA	NA	NA	NA	NA	NA	NA	NA	NA	NA	NA	NA	NA	NA	NA	NA	NA	NA	NA	NA	NA	NA	NA	NA	NA	NA	NA	NA
359	F80L absent	chr5	21459441	21459716	1.44657	-1.60842	62	7	NA	NA	NA	NA	NA	NA	0	NA	NA	NA	NA	NA	NA	NA	NA	NA	NA	NA	NA	NA	NA	NA	NA	NA	NA	NA	NA	NA	NA	NA	NA	NA	NA	NA	NA	NA	NA	NA	NA	NA	NA
360	F80L absent	chr22	25346275	25346717	3.2763	0.298059	116	17	2	25346459	25346481	AGGACTCTGGGAGTTGTAGTTC	6.67e-11	9	0	NA	NA	NA	NA	NA	NA	NA	NA	NA	NA	NA	NA	NA	NA	NA	NA	NA	NA	NA	NA	NA	NA	NA	NA	NA	NA	NA	NA	NA	NA	NA	NA	NA	NA
361	F80L absent	chr16	31470282	31471133	2.87643	-0.317814	267	28	2	31470704	31470726	TGCAAGTCGGAAGTTGTAGTTC	8.45e-07	13	1	RP11-452L6.5	350	-	antisense	0.910733	0.695994	1.16993	0.807355	0.161404	0.818138	NA	NA	NA	NA	NA	NA	NA	NA	NA	NA	NA	NA	NA	NA	NA	NA	NA	NA	NA	NA	NA	NA	NA	NA
362	F80L absent	chr16	4897147	4897459	1.28542	-0.830649	63	11	NA	NA	NA	NA	NA	NA	1	GLYR1	40	-	protein_coding	5.31796	5.45615	5.50016	5.50271	0.0422728	0.862334	NA	NA	NA	NA	NA	NA	NA	NA	NA	NA	NA	NA	NA	NA	NA	NA	NA	NA	NA	NA	NA	NA	NA	NA
363	F80L absent	chr17	73008519	73008917	1.42179	-0.954633	71	12	NA	NA	NA	NA	NA	NA	1	ICT1	47	+	protein_coding	5.09043	5.36772	5.01436	5.33807	-0.111163	0.802357	NA	NA	NA	NA	NA	NA	NA	NA	NA	NA	NA	NA	NA	NA	NA	NA	NA	NA	NA	NA	NA	NA	NA	NA
364	common	chr2	74756613	74757184	4.72106	0.607818	699	35	7	74756953	74756975	CGAATGCCGGGAATTGTGGTCT	7.35e-08	15	2	HTRA2	-394	+	protein_coding	4.28836	4.3067	5.1807	5.0955	0.789593	4e-08	AUP1	168	-	protein_coding	5.88533	5.84172	5.73254	5.8089	-0.183222	0.360225	NA	NA	NA	NA	NA	NA	NA	NA	NA	NA	NA	NA	NA	NA
365	F80L absent	chr17	38137014	38137391	1.66865	-0.511959	75	15	4	38137045	38137067	GGCCTTCTGGGAAACGCCAGGC	7.46e-05	102	1	PSMD3	-152	+	protein_coding	6.56834	6.44609	6.59291	6.60748	0.065256	0.751854	NA	NA	NA	NA	NA	NA	NA	NA	NA	NA	NA	NA	NA	NA	NA	NA	NA	NA	NA	NA	NA	NA	NA	NA
366	F80L absent	chr2	220150695	220151391	2.96014	0.30534	164	14	6	220150924	220150946	CGCACTCTGGGATTTGTAGTCC	1e-09	24	0	NA	NA	NA	NA	NA	NA	NA	NA	NA	NA	NA	NA	NA	NA	NA	NA	NA	NA	NA	NA	NA	NA	NA	NA	NA	NA	NA	NA	NA	NA	NA	NA	NA	NA
367	F80L absent	chr9	114244864	114245563	2.56809	0.0473057	248	24	3	114245064	114245086	TGCTTTGTGGGAAGTGTAGTTC	3.26e-09	15	0	NA	NA	NA	NA	NA	NA	NA	NA	NA	NA	NA	NA	NA	NA	NA	NA	NA	NA	NA	NA	NA	NA	NA	NA	NA	NA	NA	NA	NA	NA	NA	NA	NA	NA
368	F80L absent	chr5	508619	509004	0.830017	-1.07217	51	17	NA	NA	NA	NA	NA	NA	0	NA	NA	NA	NA	NA	NA	NA	NA	NA	NA	NA	NA	NA	NA	NA	NA	NA	NA	NA	NA	NA	NA	NA	NA	NA	NA	NA	NA	NA	NA	NA	NA	NA	NA
369	F80L absent	chr16	88897630	88898420	0.606367	-1.26916	97	24	3	88898308	88898330	GGGTGCATGGGGGAGGTGGCCA	0.000557	24	0	NA	NA	NA	NA	NA	NA	NA	NA	NA	NA	NA	NA	NA	NA	NA	NA	NA	NA	NA	NA	NA	NA	NA	NA	NA	NA	NA	NA	NA	NA	NA	NA	NA	NA
370	F80L absent	chr2	3622647	3623076	2.33694	-0.335069	73	11	2	3622733	3622755	TCCGCCCTAGGATTCGTACTTT	0.000138	37	1	RPS7	-66	+	protein_coding	10.4468	10.5604	10.3307	10.5459	-0.0903837	0.718678	NA	NA	NA	NA	NA	NA	NA	NA	NA	NA	NA	NA	NA	NA	NA	NA	NA	NA	NA	NA	NA	NA	NA	NA
371	F80L absent	chr15	101874300	101874793	2.06427	-0.890991	91	29	NA	NA	NA	NA	NA	NA	1	RP11-299G20.3	96	+	ND	ND	ND	ND	ND	ND	ND	NA	NA	NA	NA	NA	NA	NA	NA	NA	NA	NA	NA	NA	NA	NA	NA	NA	NA	NA	NA	NA	NA	NA	NA
372	F80L absent	chr17	3749178	3749730	0.922909	-0.779761	77	14	NA	NA	NA	NA	NA	NA	1	C17orf85	91	-	protein_coding	5.0691	5.12557	5.1206	5.23726	0.00965623	0.971907	NA	NA	NA	NA	NA	NA	NA	NA	NA	NA	NA	NA	NA	NA	NA	NA	NA	NA	NA	NA	NA	NA	NA	NA
373	F80L absent	chr7	150689518	150691087	3.32447	0.132147	382	30	4	150690010	150690032	TGCATTCTGGGAACTGTAGTTT	3.63e-11	6	0	NA	NA	NA	NA	NA	NA	NA	NA	NA	NA	NA	NA	NA	NA	NA	NA	NA	NA	NA	NA	NA	NA	NA	NA	NA	NA	NA	NA	NA	NA	NA	NA	NA	NA
374	F80L absent	chr20	18774444	18774819	3.11974	-0.615336	55	0	1	18774630	18774652	GGAATTCTGGGAAACGTAGTTC	6.63e-10	8	1	LINC00652	348	-	ND	ND	ND	ND	ND	ND	ND	NA	NA	NA	NA	NA	NA	NA	NA	NA	NA	NA	NA	NA	NA	NA	NA	NA	NA	NA	NA	NA	NA	NA	NA
375	F80L absent	chr17	46178556	46179187	3.3378	-0.0647832	553	59	4	46178896	46178918	GGCGCTTCGGGCCTTGTAGTCT	3.08e-06	8	1	CBX1	12	-	protein_coding	6.61117	6.61677	6.5404	6.71246	-0.0630642	0.726755	NA	NA	NA	NA	NA	NA	NA	NA	NA	NA	NA	NA	NA	NA	NA	NA	NA	NA	NA	NA	NA	NA	NA	NA
376	F80L absent	chr17	7760200	7761477	4.31293	1.00419	917	63	3	7760570	7760592	GGGCTGCCGGGAGCTGTGGTTC	2.18e-08	5	1	CYB5D1	226	+	protein_coding	3.87774	4.10852	4.81198	4.79909	0.786613	1.23579e-08	NA	NA	NA	NA	NA	NA	NA	NA	NA	NA	NA	NA	NA	NA	NA	NA	NA	NA	NA	NA	NA	NA	NA	NA
377	F80L absent	chr1	100598357	100598812	3.0212	0.0845902	138	13	2	100598575	100598597	GGGAAGACGGTTGTGGTAGTTC	5e-05	15	2	SASS6	-73	-	protein_coding	4.58316	4.73227	4.80735	4.88509	0.0851911	0.707748	TRMT13	122	+	protein_coding	4.21257	4.40259	4.4363	4.2426	-0.077526	0.79043	NA	NA	NA	NA	NA	NA	NA	NA	NA	NA	NA	NA	NA	NA
378	F80L absent	chr22	46731385	46731725	1.56872	-1.83354	69	4	2	46731648	46731670	GGGCGACTGGCGGATGCAGGCC	0.000601	85	0	NA	NA	NA	NA	NA	NA	NA	NA	NA	NA	NA	NA	NA	NA	NA	NA	NA	NA	NA	NA	NA	NA	NA	NA	NA	NA	NA	NA	NA	NA	NA	NA	NA	NA
379	F80L absent	chr15	65903399	65903639	1.7175	-0.511043	68	7	3	65903556	65903578	TCCGCGCTGGGCGGGGCGGTCC	0.00047	90	2	VWA9	108	-	protein_coding	5.59574	5.63604	5.63749	5.53916	-0.0490123	0.820631	SLC24A1	185	+	protein_coding	2.18269	1.97085	2.08746	2.15381	0.159664	0.725519	NA	NA	NA	NA	NA	NA	NA	NA	NA	NA	NA	NA	NA	NA
380	F80L absent	chr3	61235501	61236103	5.36385	0.783264	407	25	5	61235744	61235766	GTCCACATGGGAGTTGTAGTTC	1.59e-07	2	0	NA	NA	NA	NA	NA	NA	NA	NA	NA	NA	NA	NA	NA	NA	NA	NA	NA	NA	NA	NA	NA	NA	NA	NA	NA	NA	NA	NA	NA	NA	NA	NA	NA	NA
381	F80L absent	chr4	99850026	99850559	2.15711	-0.70276	72	9	4	99850418	99850440	AGGCTTCTGGGAAGTGGAGTCT	3.5e-09	2	1	RP11-571L19.7	-244	+	ND	ND	ND	ND	ND	ND	ND	NA	NA	NA	NA	NA	NA	NA	NA	NA	NA	NA	NA	NA	NA	NA	NA	NA	NA	NA	NA	NA	NA	NA	NA
382	F80L absent	chr19	50169281	50169583	1.74264	-0.32085	64	5	NA	NA	NA	NA	NA	NA	1	IRF3	-300	-	protein_coding	4.57894	4.11936	3.95233	4.03914	-0.478935	0.244275	NA	NA	NA	NA	NA	NA	NA	NA	NA	NA	NA	NA	NA	NA	NA	NA	NA	NA	NA	NA	NA	NA	NA	NA
383	F80L absent	chr20	57226084	57226470	2.68439	0.177824	111	22	7	57226283	57226305	GTGGTCCCGGGTTCTGGCGTTC	0.000373	38	2	STX16	51	+	protein_coding	2.7866	3.41143	3.34483	3.67129	0.0361563	0.948134	STX16-NPEPL1	213	+	protein_coding	-0.200913	0.748461	1.70487	1.65992	1.5682	0.15702	NA	NA	NA	NA	NA	NA	NA	NA	NA	NA	NA	NA	NA	NA
384	F80L absent	chr1	18271132	18271685	2.34278	0	53	5	NA	NA	NA	NA	NA	NA	0	NA	NA	NA	NA	NA	NA	NA	NA	NA	NA	NA	NA	NA	NA	NA	NA	NA	NA	NA	NA	NA	NA	NA	NA	NA	NA	NA	NA	NA	NA	NA	NA	NA	NA
385	F80L absent	chr2	95872900	95873662	3.84327	0.897105	432	55	4	95873251	95873273	AGGATTCTGGGAGTGGTAGTTC	4.06e-10	9	1	AC092835.2	2	+	lincRNA	1.52105	1.52607	1.83996	1.83592	0.290907	0.710614	NA	NA	NA	NA	NA	NA	NA	NA	NA	NA	NA	NA	NA	NA	NA	NA	NA	NA	NA	NA	NA	NA	NA	NA
386	F80L absent	chr12	48690301	48690677	2.76073	-0.226414	76	8	2	48690481	48690503	TGGCCTGTGGGAAATGTAGTCT	2.37e-09	22	0	NA	NA	NA	NA	NA	NA	NA	NA	NA	NA	NA	NA	NA	NA	NA	NA	NA	NA	NA	NA	NA	NA	NA	NA	NA	NA	NA	NA	NA	NA	NA	NA	NA	NA
387	F80L absent	chr14	105881292	105881855	4.49963	1.22725	597	38	2	105881604	105881626	GGGCGCCTGGGAGATGTAGTTC	2.35e-09	38	0	NA	NA	NA	NA	NA	NA	NA	NA	NA	NA	NA	NA	NA	NA	NA	NA	NA	NA	NA	NA	NA	NA	NA	NA	NA	NA	NA	NA	NA	NA	NA	NA	NA	NA
388	F80L absent	chr14	73493583	73494270	3.7234	1.65125	401	43	4	73493987	73494009	TCAGTACTGGGAGTTGTAGTCA	2.05e-06	26	1	ZFYVE1	-6	-	protein_coding	1.74416	1.65076	1.60407	1.45943	-0.276865	0.462582	NA	NA	NA	NA	NA	NA	NA	NA	NA	NA	NA	NA	NA	NA	NA	NA	NA	NA	NA	NA	NA	NA	NA	NA
389	F80L absent	chr1	167404189	167404687	1.43103	-0.720226	57	12	NA	NA	NA	NA	NA	NA	0	NA	NA	NA	NA	NA	NA	NA	NA	NA	NA	NA	NA	NA	NA	NA	NA	NA	NA	NA	NA	NA	NA	NA	NA	NA	NA	NA	NA	NA	NA	NA	NA	NA	NA
390	F80L absent	chr20	38097474	38097793	2.64111	1.13124	23	6	NA	NA	NA	NA	NA	NA	0	NA	NA	NA	NA	NA	NA	NA	NA	NA	NA	NA	NA	NA	NA	NA	NA	NA	NA	NA	NA	NA	NA	NA	NA	NA	NA	NA	NA	NA	NA	NA	NA	NA	NA
391	F80L absent	chr6	32096012	32096553	2.54372	-0.365029	67	5	NA	NA	NA	NA	NA	NA	1	ATF6B	-252	-	protein_coding	4.09677	4.1416	4.22805	4.05658	-0.0744703	0.849058	NA	NA	NA	NA	NA	NA	NA	NA	NA	NA	NA	NA	NA	NA	NA	NA	NA	NA	NA	NA	NA	NA	NA	NA
392	F80L absent	chr5	157158216	157158570	2.31645	-0.303247	49	5	NA	NA	NA	NA	NA	NA	1	THG1L	-188	+	protein_coding	3.83188	3.8166	3.90689	4.04876	0.0927139	0.778075	NA	NA	NA	NA	NA	NA	NA	NA	NA	NA	NA	NA	NA	NA	NA	NA	NA	NA	NA	NA	NA	NA	NA	NA
393	F80L absent	chr1	156023564	156023952	2.1371	-0.546407	88	20	1	156023789	156023811	GGGCCTCTGGGAGGGGGAAGGG	8.54e-05	87	1	UBQLN4	-173	-	protein_coding	4.55704	4.66221	4.851	4.81096	0.208661	0.170309	NA	NA	NA	NA	NA	NA	NA	NA	NA	NA	NA	NA	NA	NA	NA	NA	NA	NA	NA	NA	NA	NA	NA	NA
394	F80L absent	chr5	14125796	14126122	0.904815	-0.434855	74	28	2	14125946	14125968	TTGAACCTGGGAGGCAGAGTTT	8.29e-05	68	0	NA	NA	NA	NA	NA	NA	NA	NA	NA	NA	NA	NA	NA	NA	NA	NA	NA	NA	NA	NA	NA	NA	NA	NA	NA	NA	NA	NA	NA	NA	NA	NA	NA	NA
395	F80L absent	chr19	49489583	49489883	2.27929	-0.637144	65	15	4	49489831	49489853	TGGGAGGCGGGAATTGCAGTGA	0.000103	66	0	NA	NA	NA	NA	NA	NA	NA	NA	NA	NA	NA	NA	NA	NA	NA	NA	NA	NA	NA	NA	NA	NA	NA	NA	NA	NA	NA	NA	NA	NA	NA	NA	NA	NA
396	F80L absent	chr16	58426241	58427039	4.41073	1.26887	481	45	3	58426723	58426745	GGCCCGCCGGGAGCTGCAGTCT	1.3e-07	24	0	NA	NA	NA	NA	NA	NA	NA	NA	NA	NA	NA	NA	NA	NA	NA	NA	NA	NA	NA	NA	NA	NA	NA	NA	NA	NA	NA	NA	NA	NA	NA	NA	NA	NA
397	F80L absent	chr1	149982538	149982858	0.926259	-0.70784	58	11	NA	NA	NA	NA	NA	NA	1	OTUD7B	-73	-	protein_coding	3.27352	3.15381	3.23113	3.32048	0.0718612	0.787589	NA	NA	NA	NA	NA	NA	NA	NA	NA	NA	NA	NA	NA	NA	NA	NA	NA	NA	NA	NA	NA	NA	NA	NA
398	F80L absent	chr22	38198053	38198734	4.04982	0.676087	603	60	1	38198411	38198433	CTGCTCCTGGGAAATGTAGTCC	3.86e-08	11	0	NA	NA	NA	NA	NA	NA	NA	NA	NA	NA	NA	NA	NA	NA	NA	NA	NA	NA	NA	NA	NA	NA	NA	NA	NA	NA	NA	NA	NA	NA	NA	NA	NA	NA
399	F80L absent	chr1	11072683	11073255	1.47649	-1.34575	77	4	NA	NA	NA	NA	NA	NA	0	NA	NA	NA	NA	NA	NA	NA	NA	NA	NA	NA	NA	NA	NA	NA	NA	NA	NA	NA	NA	NA	NA	NA	NA	NA	NA	NA	NA	NA	NA	NA	NA	NA	NA
400	F80L absent	chr19	37959870	37960467	3.09545	0	293	25	2	37960177	37960199	GGTCCGCTGGGAAACGTAGTCC	1.18e-08	4	1	ZNF569	9	-	protein_coding	2.79494	2.59932	2.56071	2.59694	-0.124238	0.716515	NA	NA	NA	NA	NA	NA	NA	NA	NA	NA	NA	NA	NA	NA	NA	NA	NA	NA	NA	NA	NA	NA	NA	NA
401	F80L absent	chr12	109915111	109915489	2.53619	-0.28398	82	10	1	109915359	109915381	TCCTTCCCGGGCGAAGAAGCTC	0.000516	125	2	UBE3B	-93	+	protein_coding	3.2765	3.2555	3.59335	3.70377	0.260107	0.231603	KCTD10	49	-	protein_coding	3.89433	3.76022	3.73552	3.91456	-0.0857857	0.7995	NA	NA	NA	NA	NA	NA	NA	NA	NA	NA	NA	NA	NA	NA
402	F80L absent	chr20	30326768	30327184	2.67363	-0.260337	99	11	5	30326925	30326947	GAGTTCCTGGGAAGTGTAGTCT	1.06e-07	39	1	TPX2	98	+	protein_coding	5.90159	5.9798	6.17053	6.34607	0.29781	0.0731642	NA	NA	NA	NA	NA	NA	NA	NA	NA	NA	NA	NA	NA	NA	NA	NA	NA	NA	NA	NA	NA	NA	NA	NA
403	F80L absent	chr16	29393617	29394465	0.530844	-1.48097	11	1	NA	NA	NA	NA	NA	NA	0	NA	NA	NA	NA	NA	NA	NA	NA	NA	NA	NA	NA	NA	NA	NA	NA	NA	NA	NA	NA	NA	NA	NA	NA	NA	NA	NA	NA	NA	NA	NA	NA	NA	NA
404	F80L absent	chr1	247611397	247611763	3.15971	0.514264	47	3	NA	NA	NA	NA	NA	NA	0	NA	NA	NA	NA	NA	NA	NA	NA	NA	NA	NA	NA	NA	NA	NA	NA	NA	NA	NA	NA	NA	NA	NA	NA	NA	NA	NA	NA	NA	NA	NA	NA	NA	NA
405	common	chr7	128864424	128864788	5.89041	1.81416	984	76	5	128864641	128864663	TGTAGGTCGGGGCCTGAGGTCC	0.000395	7	1	AHCYL2	258	+	protein_coding	2.45943	2.94673	3.51223	3.20789	0.524404	0.0352547	NA	NA	NA	NA	NA	NA	NA	NA	NA	NA	NA	NA	NA	NA	NA	NA	NA	NA	NA	NA	NA	NA	NA	NA
406	F80L absent	chr22	37447512	37448141	3.10243	0.101165	357	38	3	37447716	37447738	GGCAGGCCGGGAGCTGTAGTCC	1.29e-08	7	1	KCTD17	-47	+	protein_coding	4.1375	3.73118	3.68706	3.46467	-0.350809	0.387835	NA	NA	NA	NA	NA	NA	NA	NA	NA	NA	NA	NA	NA	NA	NA	NA	NA	NA	NA	NA	NA	NA	NA	NA
407	F80L absent	chr1	150980609	150981088	3.49096	0.823122	319	32	3	150980845	150980867	AGGCTCCTGGGACGTCTTTCCG	0.000526	23	2	FAM63A	3	-	protein_coding	2.68257	2.43029	2.01792	2.06695	-0.431316	0.165085	PRUNE	48	+	protein_coding	3.56316	3.64155	4.11187	4.14405	0.452813	0.0132573	NA	NA	NA	NA	NA	NA	NA	NA	NA	NA	NA	NA	NA	NA
408	common	chr10	111985471	111985810	5.53289	1.41504	617	35	4	111985628	111985650	CGGCTGCCGGGAATCGTAGTGC	1.66e-07	16	0	NA	NA	NA	NA	NA	NA	NA	NA	NA	NA	NA	NA	NA	NA	NA	NA	NA	NA	NA	NA	NA	NA	NA	NA	NA	NA	NA	NA	NA	NA	NA	NA	NA	NA
409	F80L absent	chr19	36618643	36619077	2.91261	0.17438	179	22	4	36618828	36618850	TGCATTATGGGTCGCGTAGTCT	4.02e-07	8	0	NA	NA	NA	NA	NA	NA	NA	NA	NA	NA	NA	NA	NA	NA	NA	NA	NA	NA	NA	NA	NA	NA	NA	NA	NA	NA	NA	NA	NA	NA	NA	NA	NA	NA
410	F80L absent	chr17	21903007	21907105	0.0506266	-1.50782	1003	375	2	21906132	21906154	GGCCGCGTGGGAGAGGGGGCCA	0.000126	159	3	RP11-1109M24.11	-362	-	ND	ND	ND	ND	ND	ND	ND	RP11-744K17.9	1361	+	ND	ND	ND	ND	ND	ND	ND	RP11-1109M24.9	2011	-	ND	ND	ND	ND	ND	ND	ND	NA	NA	NA	NA
411	F80L absent	chr9	140273349	140273954	1.0652	-0.786293	151	45	15	140273690	140273712	GGGCCGAGGGGAATGGGGCGTC	0.000399	9	0	NA	NA	NA	NA	NA	NA	NA	NA	NA	NA	NA	NA	NA	NA	NA	NA	NA	NA	NA	NA	NA	NA	NA	NA	NA	NA	NA	NA	NA	NA	NA	NA	NA	NA
412	F80L absent	chr19	57751547	57752198	2.86914	0.722954	253	29	3	57751856	57751878	TGCCTTGTAGTTAATGTAGTTT	7.81e-06	18	1	ZNF805	101	+	protein_coding	2.69377	2.96717	3.09085	3.09592	0.224077	0.554283	NA	NA	NA	NA	NA	NA	NA	NA	NA	NA	NA	NA	NA	NA	NA	NA	NA	NA	NA	NA	NA	NA	NA	NA
413	F80L absent	chr4	146101432	146101956	4.36625	0.828435	598	68	3	146101835	146101857	GCGCTGTAGGGACTTGTAGTCC	3.35e-06	44	1	OTUD4	-381	-	protein_coding	4.46532	4.54967	4.40803	4.48864	-0.0182775	0.939122	NA	NA	NA	NA	NA	NA	NA	NA	NA	NA	NA	NA	NA	NA	NA	NA	NA	NA	NA	NA	NA	NA	NA	NA
414	F80L absent	chr17	18684361	18684748	3.16949	0.242225	130	22	5	18684572	18684594	TGGCTCCCGGAAGTAGGGCTGG	0.000987	58	1	TVP23B	-246	+	protein_coding	4.90256	4.95373	5.09043	4.91409	0.0926241	0.715116	NA	NA	NA	NA	NA	NA	NA	NA	NA	NA	NA	NA	NA	NA	NA	NA	NA	NA	NA	NA	NA	NA	NA	NA
415	common	chr7	87563232	87563529	4.16752	1.3797	392	36	1	87563393	87563415	AGTCAGCTGGGAAATGTAGTTC	1.46e-08	20	1	ADAM22	78	+	protein_coding	2.96532	3.14731	2.32481	2.22342	-0.837192	1.19236e-05	NA	NA	NA	NA	NA	NA	NA	NA	NA	NA	NA	NA	NA	NA	NA	NA	NA	NA	NA	NA	NA	NA	NA	NA
416	F80L absent	chr5	394546	394945	0.410284	-0.470891	97	53	NA	NA	NA	NA	NA	NA	0	NA	NA	NA	NA	NA	NA	NA	NA	NA	NA	NA	NA	NA	NA	NA	NA	NA	NA	NA	NA	NA	NA	NA	NA	NA	NA	NA	NA	NA	NA	NA	NA	NA	NA
417	F80L absent	chr3	197767422	197767876	2.22161	-0.102726	26	9	NA	NA	NA	NA	NA	NA	0	NA	NA	NA	NA	NA	NA	NA	NA	NA	NA	NA	NA	NA	NA	NA	NA	NA	NA	NA	NA	NA	NA	NA	NA	NA	NA	NA	NA	NA	NA	NA	NA	NA	NA
418	F80L absent	chr19	531069	531688	3.12169	0	335	35	2	531598	531620	GGGACGCCGGGAGGTGGAGTCC	4.22e-08	45	1	CDC34	336	+	protein_coding	5.97384	5.40327	5.49185	5.3906	-0.234568	0.528148	NA	NA	NA	NA	NA	NA	NA	NA	NA	NA	NA	NA	NA	NA	NA	NA	NA	NA	NA	NA	NA	NA	NA	NA
419	F80L absent	chr5	474258	474881	0.683251	-0.761987	121	34	NA	NA	NA	NA	NA	NA	0	NA	NA	NA	NA	NA	NA	NA	NA	NA	NA	NA	NA	NA	NA	NA	NA	NA	NA	NA	NA	NA	NA	NA	NA	NA	NA	NA	NA	NA	NA	NA	NA	NA	NA
420	F80L absent	chr2	27319052	27319466	3.0312	0.509978	87	16	3	27319268	27319290	GGGATTCTGGGAAGTGTAGGCT	2.29e-09	8	0	NA	NA	NA	NA	NA	NA	NA	NA	NA	NA	NA	NA	NA	NA	NA	NA	NA	NA	NA	NA	NA	NA	NA	NA	NA	NA	NA	NA	NA	NA	NA	NA	NA	NA
421	F80L absent	chr7	150725342	150726018	4.22734	0.865377	401	42	6	150725754	150725776	GGCCCGCCGGGAGATGGAGTCC	7.07e-09	7	1	ABCB8	-170	+	protein_coding	2.9982	2.50843	3.49953	3.12763	0.451535	0.27052	NA	NA	NA	NA	NA	NA	NA	NA	NA	NA	NA	NA	NA	NA	NA	NA	NA	NA	NA	NA	NA	NA	NA	NA
422	F80L absent	chr22	20104627	20104966	1.40928	-0.291463	80	10	NA	NA	NA	NA	NA	NA	1	TRMT2A	119	-	protein_coding	5.94579	5.5043	5.39506	5.04483	-0.648054	0.0240271	NA	NA	NA	NA	NA	NA	NA	NA	NA	NA	NA	NA	NA	NA	NA	NA	NA	NA	NA	NA	NA	NA	NA	NA
423	F80L absent	chr17	57970496	57970863	1.19231	-1.36585	71	9	NA	NA	NA	NA	NA	NA	2	TUBD1	-375	-	protein_coding	4.44361	4.43229	4.41886	4.48478	-0.0187557	0.955158	RPS6KB1	-232	+	protein_coding	5.67807	5.7137	5.851	5.79753	0.0418292	0.841288	NA	NA	NA	NA	NA	NA	NA	NA	NA	NA	NA	NA	NA	NA
424	F80L absent	chr13	50366715	50367327	3.37837	0.44899	224	35	3	50367066	50367088	GGCATGATGGGAACTGTAGTTG	4.25e-09	12	1	KPNA3	36	-	protein_coding	4.48993	4.68032	4.41278	4.40599	-0.212573	0.282686	NA	NA	NA	NA	NA	NA	NA	NA	NA	NA	NA	NA	NA	NA	NA	NA	NA	NA	NA	NA	NA	NA	NA	NA
425	F80L absent	chr13	41768297	41769013	3.77445	0.696532	392	32	3	41768697	41768719	GGCAACCTGGGAGCAGTAGTTC	8.67e-08	8	1	KBTBD7	47	-	protein_coding	2.70708	2.66221	1.92979	1.76553	-0.863642	3.88776e-07	NA	NA	NA	NA	NA	NA	NA	NA	NA	NA	NA	NA	NA	NA	NA	NA	NA	NA	NA	NA	NA	NA	NA	NA
426	F80L absent	chr13	114601739	114603249	0.84125	-1.36215	89	25	NA	NA	NA	NA	NA	NA	0	NA	NA	NA	NA	NA	NA	NA	NA	NA	NA	NA	NA	NA	NA	NA	NA	NA	NA	NA	NA	NA	NA	NA	NA	NA	NA	NA	NA	NA	NA	NA	NA	NA	NA
427	F80L absent	chr11	117198238	117198893	2.0839	-0.160108	123	19	5	117198545	117198567	ACACTTCCGGAAAAGGTACCGC	0.000874	1	1	AP000892.4	189	-	ND	ND	ND	ND	ND	ND	ND	NA	NA	NA	NA	NA	NA	NA	NA	NA	NA	NA	NA	NA	NA	NA	NA	NA	NA	NA	NA	NA	NA	NA	NA
428	common	chr16	67700518	67700857	4.42441	0.719191	542	45	4	67700701	67700723	AGCGTCCTGGGGCTTGTAGTTT	5.04e-08	0	1	C16orf86	32	+	ND	ND	ND	ND	ND	ND	ND	NA	NA	NA	NA	NA	NA	NA	NA	NA	NA	NA	NA	NA	NA	NA	NA	NA	NA	NA	NA	NA	NA	NA	NA
429	F80L absent	chr8	142560858	142561583	0.521533	-1.97436	118	18	12	142561112	142561134	CGCCTGGTGGGCTGGGGTCTCT	0.000871	19	0	NA	NA	NA	NA	NA	NA	NA	NA	NA	NA	NA	NA	NA	NA	NA	NA	NA	NA	NA	NA	NA	NA	NA	NA	NA	NA	NA	NA	NA	NA	NA	NA	NA	NA
430	F80L absent	chr17	7465158	7465521	1.08823	-2.2215	53	1	NA	NA	NA	NA	NA	NA	1	SENP3	-147	+	protein_coding	6.46189	6.48768	6.60851	6.69794	-0.0705035	0.768495	NA	NA	NA	NA	NA	NA	NA	NA	NA	NA	NA	NA	NA	NA	NA	NA	NA	NA	NA	NA	NA	NA	NA	NA
431	F80L absent	chr20	47131868	47132327	0.506135	-1.689	161	48	NA	NA	NA	NA	NA	NA	0	NA	NA	NA	NA	NA	NA	NA	NA	NA	NA	NA	NA	NA	NA	NA	NA	NA	NA	NA	NA	NA	NA	NA	NA	NA	NA	NA	NA	NA	NA	NA	NA	NA	NA
432	common	chr19	1241542	1241798	5.75315	1.90574	999	82	6	1241695	1241717	GCCCTGCCGGGAGTCGTAGTTC	3.89e-08	2	1	ATP5D	79	+	protein_coding	5.19849	4.37712	4.40122	4.16672	-0.514092	0.326344	NA	NA	NA	NA	NA	NA	NA	NA	NA	NA	NA	NA	NA	NA	NA	NA	NA	NA	NA	NA	NA	NA	NA	NA
433	F80L absent	chr19	40697800	40698291	1.16234	-0.232071	71	18	NA	NA	NA	NA	NA	NA	1	MAP3K10	-394	+	protein_coding	2.42223	2.28096	2.39506	2.05658	-0.579713	0.381288	NA	NA	NA	NA	NA	NA	NA	NA	NA	NA	NA	NA	NA	NA	NA	NA	NA	NA	NA	NA	NA	NA	NA	NA
434	F80L absent	chr2	99953646	99953890	2.01265	-0.52274	72	9	1	99953815	99953837	AGGCGGCTGGGCGATGCGCTTG	0.000285	39	1	EIF5B	48	+	protein_coding	4.93734	4.65191	4.7301	4.68089	-0.261108	0.330725	NA	NA	NA	NA	NA	NA	NA	NA	NA	NA	NA	NA	NA	NA	NA	NA	NA	NA	NA	NA	NA	NA	NA	NA
435	common	chr9	140288614	140288882	1.04118	-0.696989	186	44	14	140288720	140288742	CGGAGGCTGGGAGGCCGGGGTT	0.000276	10	0	NA	NA	NA	NA	NA	NA	NA	NA	NA	NA	NA	NA	NA	NA	NA	NA	NA	NA	NA	NA	NA	NA	NA	NA	NA	NA	NA	NA	NA	NA	NA	NA	NA	NA
436	F80L absent	chr9	140259907	140260217	2.37335	-0.754031	70	10	3	140259906	140259928	TGACATCTGGGAGGGGAGGGGC	0.000148	27	0	NA	NA	NA	NA	NA	NA	NA	NA	NA	NA	NA	NA	NA	NA	NA	NA	NA	NA	NA	NA	NA	NA	NA	NA	NA	NA	NA	NA	NA	NA	NA	NA	NA	NA
437	F80L absent	chr1	151226680	151227486	2.72339	0.049693	316	51	2	151227107	151227129	TGCGTTCTGGGAGTTGTAGGTG	2.28e-08	20	1	PSMD4	96	+	protein_coding	7.64184	7.75475	7.46377	7.94369	-0.14412	0.508619	NA	NA	NA	NA	NA	NA	NA	NA	NA	NA	NA	NA	NA	NA	NA	NA	NA	NA	NA	NA	NA	NA	NA	NA
438	F80L absent	chr8	142602693	142602924	3.60962	-0.460417	26	3	NA	NA	NA	NA	NA	NA	0	NA	NA	NA	NA	NA	NA	NA	NA	NA	NA	NA	NA	NA	NA	NA	NA	NA	NA	NA	NA	NA	NA	NA	NA	NA	NA	NA	NA	NA	NA	NA	NA	NA	NA
439	F80L absent	chr1	142890669	142891286	1.72228	-0.444333	100	16	2	142890981	142891003	CCGCCTCTGGGTGCCGCACTTC	0.000401	10	0	NA	NA	NA	NA	NA	NA	NA	NA	NA	NA	NA	NA	NA	NA	NA	NA	NA	NA	NA	NA	NA	NA	NA	NA	NA	NA	NA	NA	NA	NA	NA	NA	NA	NA
440	F80L absent	chr18	13726214	13726800	4.05243	0.403734	357	31	4	13726570	13726592	GGCACGTCGGGACTCGTAGTTC	1.11e-07	25	2	FAM210A	155	-	protein_coding	3.88264	4.2032	4.48543	4.45549	0.417797	0.0143046	RNMT	152	+	protein_coding	4.33128	4.52482	4.57168	4.51538	0.114496	0.56686	NA	NA	NA	NA	NA	NA	NA	NA	NA	NA	NA	NA	NA	NA
441	common	chr9	88896870	88897433	4.06851	1.23684	693	76	3	88897053	88897075	GGCCTGACGGGAAACGTAGTTT	1.46e-08	9	1	ISCA1	525	-	protein_coding	4.67469	4.75007	5.54535	5.39438	0.748982	4.30522e-11	NA	NA	NA	NA	NA	NA	NA	NA	NA	NA	NA	NA	NA	NA	NA	NA	NA	NA	NA	NA	NA	NA	NA	NA
442	F80L absent	chr19	44905587	44906028	3.13315	0.488079	87	13	3	44905802	44905824	GGCTTTCTGGGGATTGTAGGCC	1.46e-08	5	2	CTC-512J12.6	-33	-	ND	ND	ND	ND	ND	ND	ND	ZNF285	-33	-	protein_coding	1.76977	1.80323	-0.251539	0.0565835	-2.05645	5.42081e-09	NA	NA	NA	NA	NA	NA	NA	NA	NA	NA	NA	NA	NA	NA
443	F80L absent	chr12	124055385	124056067	2.09688	-0.3244	155	13	3	124055931	124055953	AGGAGGCTGGGAAATGGAGTCC	1.53e-08	24	0	NA	NA	NA	NA	NA	NA	NA	NA	NA	NA	NA	NA	NA	NA	NA	NA	NA	NA	NA	NA	NA	NA	NA	NA	NA	NA	NA	NA	NA	NA	NA	NA	NA	NA
444	F80L absent	chr11	68741888	68742483	3.12109	0.337669	159	18	3	68742277	68742299	AGGAGTCTGGGAAATGTAGTCC	1e-09	54	0	NA	NA	NA	NA	NA	NA	NA	NA	NA	NA	NA	NA	NA	NA	NA	NA	NA	NA	NA	NA	NA	NA	NA	NA	NA	NA	NA	NA	NA	NA	NA	NA	NA	NA
445	F80L absent	chr19	44763724	44764229	2.60415	0.101736	275	39	2	44763998	44764020	GGCATTCTGGGAAGTGTAGTGC	3.09e-10	11	0	NA	NA	NA	NA	NA	NA	NA	NA	NA	NA	NA	NA	NA	NA	NA	NA	NA	NA	NA	NA	NA	NA	NA	NA	NA	NA	NA	NA	NA	NA	NA	NA	NA	NA
446	F80L absent	chr19	48965092	48966043	2.26757	-0.122294	253	47	6	48965736	48965758	GGGATTGTGGGAGATGTAGGCC	5.6e-09	24	0	NA	NA	NA	NA	NA	NA	NA	NA	NA	NA	NA	NA	NA	NA	NA	NA	NA	NA	NA	NA	NA	NA	NA	NA	NA	NA	NA	NA	NA	NA	NA	NA	NA	NA
447	F80L absent	chr22	33067272	33067745	2.6167	1.1966	55	13	NA	NA	NA	NA	NA	NA	0	NA	NA	NA	NA	NA	NA	NA	NA	NA	NA	NA	NA	NA	NA	NA	NA	NA	NA	NA	NA	NA	NA	NA	NA	NA	NA	NA	NA	NA	NA	NA	NA	NA	NA
448	F80L absent	chr8	798466	799030	1.8868	-1.80443	104	12	NA	NA	NA	NA	NA	NA	0	NA	NA	NA	NA	NA	NA	NA	NA	NA	NA	NA	NA	NA	NA	NA	NA	NA	NA	NA	NA	NA	NA	NA	NA	NA	NA	NA	NA	NA	NA	NA	NA	NA	NA
449	F80L absent	chr11	65635425	65635953	2.62643	0.390714	120	20	3	65635713	65635735	AGCCCCCTGGGAGACGTAGTTT	4.18e-09	12	0	NA	NA	NA	NA	NA	NA	NA	NA	NA	NA	NA	NA	NA	NA	NA	NA	NA	NA	NA	NA	NA	NA	NA	NA	NA	NA	NA	NA	NA	NA	NA	NA	NA	NA
450	F80L absent	chr1	40723506	40723967	2.43852	-0.244904	118	17	2	40723704	40723726	AGGAAGGTGGGGCTGGGGCTTT	0.000449	101	2	RP1-39G22.7	-97	-	antisense	3.45418	3.43296	3.14078	3.02148	-0.38776	0.162572	ZMPSTE24	43	+	protein_coding	6.0974	6.16531	6.21218	6.16932	0.0368345	0.86095	NA	NA	NA	NA	NA	NA	NA	NA	NA	NA	NA	NA	NA	NA
451	F80L absent	chr2	27603504	27603924	3.30385	0.251891	225	27	2	27603659	27603681	AGACGCACGGGACGCGTAGTCC	1.3e-05	20	1	ZNF513	-57	-	protein_coding	2.36737	2.01436	1.9486	1.74416	-0.460618	0.360754	NA	NA	NA	NA	NA	NA	NA	NA	NA	NA	NA	NA	NA	NA	NA	NA	NA	NA	NA	NA	NA	NA	NA	NA
452	F80L absent	chr10	44101475	44102169	3.89411	0.211763	364	37	3	44101819	44101841	AGGCCTCTGGGAAACGTAGTCT	3.5e-09	8	2	CAP1P2	-123	-	ND	ND	ND	ND	ND	ND	ND	ZNF485	33	+	protein_coding	2.61589	2.90111	1.38405	1.21412	-1.70023	8.0742e-10	NA	NA	NA	NA	NA	NA	NA	NA	NA	NA	NA	NA	NA	NA
453	F80L absent	chr7	139025067	139025470	2.57049	0.221708	115	10	1	139025301	139025323	CGTATGCTGGGAGTTGTAGTTA	2.06e-08	0	1	C7orf55-LUC7L2	-163	+	protein_coding	5.75087	5.93923	6.03738	6.11416	0.164431	0.384403	NA	NA	NA	NA	NA	NA	NA	NA	NA	NA	NA	NA	NA	NA	NA	NA	NA	NA	NA	NA	NA	NA	NA	NA
454	F80L absent	chrX	19003036	19003284	0.860302	-1.3453	22	4	NA	NA	NA	NA	NA	NA	0	NA	NA	NA	NA	NA	NA	NA	NA	NA	NA	NA	NA	NA	NA	NA	NA	NA	NA	NA	NA	NA	NA	NA	NA	NA	NA	NA	NA	NA	NA	NA	NA	NA	NA
455	F80L absent	chr14	24701354	24702147	3.69516	0.928054	341	30	3	24701812	24701834	TTCCCCCTGGGAGTTGTAGTCT	9.31e-09	16	3	NEDD8-MDP1	-192	-	protein_coding	-0.340075	-0.556393	-6.64386	1.78241	1.3333	0.717458	NEDD8	-90	-	protein_coding	7.34837	7.37808	7.4143	7.51822	0.0803825	0.735355	GMPR2	-122	+	protein_coding	5.54009	5.43729	5.77821	5.81583	0.312012	0.0247843	NA	NA	NA	NA
456	F80L absent	chr6	168133421	168133884	1.78765	-0.844026	39	18	NA	NA	NA	NA	NA	NA	0	NA	NA	NA	NA	NA	NA	NA	NA	NA	NA	NA	NA	NA	NA	NA	NA	NA	NA	NA	NA	NA	NA	NA	NA	NA	NA	NA	NA	NA	NA	NA	NA	NA	NA
457	F80L absent	chr9	7799626	7800008	3.40261	0.670583	153	15	3	7799858	7799880	GGGCTGCTGGGAAATGAAGTTC	8.38e-10	24	0	NA	NA	NA	NA	NA	NA	NA	NA	NA	NA	NA	NA	NA	NA	NA	NA	NA	NA	NA	NA	NA	NA	NA	NA	NA	NA	NA	NA	NA	NA	NA	NA	NA	NA
458	common	chr11	114309969	114310244	5.09796	1.46546	400	38	3	114310128	114310150	CGTACGCTGGGACGTGTGGTTT	9.85e-07	14	1	REXO2	2	+	protein_coding	5.55735	5.64616	6.0237	5.93145	0.319603	0.0615272	NA	NA	NA	NA	NA	NA	NA	NA	NA	NA	NA	NA	NA	NA	NA	NA	NA	NA	NA	NA	NA	NA	NA	NA
459	F80L absent	chr17	41322617	41323110	2.6736	0.0999496	84	10	6	41322711	41322733	TGTTCCTTGGAAACTGTAGTCT	6.93e-06	11	2	RP11-242D8.1	-443	-	lincRNA	0.790772	1.18903	1.61353	1.45418	0.505092	0.518954	NBR1	-365	+	protein_coding	5.38612	5.23419	5.50557	5.36947	0.105151	0.550599	NA	NA	NA	NA	NA	NA	NA	NA	NA	NA	NA	NA	NA	NA
460	F80L absent	chr11	118795341	118795997	3.60253	0.293745	219	26	4	118795615	118795637	GGGCTTCTGGGAGATGTAGTCC	1.89e-11	13	1	UPK2	204	+	ND	ND	ND	ND	ND	ND	ND	NA	NA	NA	NA	NA	NA	NA	NA	NA	NA	NA	NA	NA	NA	NA	NA	NA	NA	NA	NA	NA	NA	NA	NA
461	F80L absent	chr19	41084169	41084862	4.38887	0.808904	327	35	5	41084546	41084568	GATACAGTGGGAGGTGTAGTTC	3.4e-06	3	0	NA	NA	NA	NA	NA	NA	NA	NA	NA	NA	NA	NA	NA	NA	NA	NA	NA	NA	NA	NA	NA	NA	NA	NA	NA	NA	NA	NA	NA	NA	NA	NA	NA	NA
462	common	chr11	63933501	63933851	4.40689	0.447359	474	49	3	63933629	63933651	GGCACCCTGGAACTTGTAGTCC	1.73e-08	7	1	MACROD1	-98	-	protein_coding	4.83592	4.30524	2.41143	2.12763	-2.69205	2.42939e-10	NA	NA	NA	NA	NA	NA	NA	NA	NA	NA	NA	NA	NA	NA	NA	NA	NA	NA	NA	NA	NA	NA	NA	NA
463	F80L absent	chr8	1590432	1592448	0.882366	-1.03705	76	15	NA	NA	NA	NA	NA	NA	0	NA	NA	NA	NA	NA	NA	NA	NA	NA	NA	NA	NA	NA	NA	NA	NA	NA	NA	NA	NA	NA	NA	NA	NA	NA	NA	NA	NA	NA	NA	NA	NA	NA	NA
464	F80L absent	chr14	74303299	74304221	1.92802	0.150182	102	11	4	74303521	74303543	GGAATTCTGGGAAATGTAGTTC	2.9e-11	3	0	NA	NA	NA	NA	NA	NA	NA	NA	NA	NA	NA	NA	NA	NA	NA	NA	NA	NA	NA	NA	NA	NA	NA	NA	NA	NA	NA	NA	NA	NA	NA	NA	NA	NA
465	F80L absent	chr9	139249462	139250033	0.649848	-2.01801	168	11	8	139249861	139249883	CGTCCTGGGGGAGGGGTAGCCG	0.000616	18	0	NA	NA	NA	NA	NA	NA	NA	NA	NA	NA	NA	NA	NA	NA	NA	NA	NA	NA	NA	NA	NA	NA	NA	NA	NA	NA	NA	NA	NA	NA	NA	NA	NA	NA
466	F80L absent	chr11	68659564	68660295	1.40905	-0.136119	121	23	NA	NA	NA	NA	NA	NA	0	NA	NA	NA	NA	NA	NA	NA	NA	NA	NA	NA	NA	NA	NA	NA	NA	NA	NA	NA	NA	NA	NA	NA	NA	NA	NA	NA	NA	NA	NA	NA	NA	NA	NA
467	F80L absent	chr16	4665988	4666575	2.92246	0.152647	160	24	5	4666277	4666299	GGCATTCTGGGAAAGGGAGTTT	1.71e-09	28	1	MGRN1	213	+	protein_coding	2.95233	2.69822	2.4957	2.79909	-0.332523	0.410359	NA	NA	NA	NA	NA	NA	NA	NA	NA	NA	NA	NA	NA	NA	NA	NA	NA	NA	NA	NA	NA	NA	NA	NA
468	common	chr1	235491661	235491905	5.19707	1.56555	601	64	2	235491773	235491795	GGCATTGCGGGCCTTGCAGTTC	2.11e-06	9	1	ARID4B	-249	-	protein_coding	5.16631	5.01346	5.53201	5.52982	0.372627	0.000731929	NA	NA	NA	NA	NA	NA	NA	NA	NA	NA	NA	NA	NA	NA	NA	NA	NA	NA	NA	NA	NA	NA	NA	NA
469	common	chr14	77787180	77787523	4.23742	1.35927	533	49	5	77787298	77787320	GGGCTGCTGGGAGTTGCAGTTC	1.83e-09	3	2	POMT2	-124	-	protein_coding	4.49697	4.51728	4.20945	4.11603	-0.358584	0.0775434	GSTZ1	-124	+	protein_coding	3.7866	3.851	3.08236	3.05311	-0.618377	0.0197315	NA	NA	NA	NA	NA	NA	NA	NA	NA	NA	NA	NA	NA	NA
470	common	chr21	27107513	27107763	4.14075	0.703289	324	26	3	27107706	27107728	GGCGGGAGGGGGGTTGGGGCTT	0.000768	18	1	ATP5J	346	-	protein_coding	7.51428	7.70259	7.58105	7.81532	0.0913856	0.768655	NA	NA	NA	NA	NA	NA	NA	NA	NA	NA	NA	NA	NA	NA	NA	NA	NA	NA	NA	NA	NA	NA	NA	NA
471	F80L absent	chr9	133424264	133424621	1.76258	-0.42539	90	11	4	133424408	133424430	TTGGGCCTGGGAAGAGGAGGTT	0.000227	66	0	NA	NA	NA	NA	NA	NA	NA	NA	NA	NA	NA	NA	NA	NA	NA	NA	NA	NA	NA	NA	NA	NA	NA	NA	NA	NA	NA	NA	NA	NA	NA	NA	NA	NA
472	common	chr20	46130408	46130768	4.24205	1.04186	481	45	5	46130593	46130615	GGGCCACTGGGATATGTAGTCC	7.64e-09	1	1	NCOA3	13	+	protein_coding	3.16189	3.01257	3.42626	3.29278	0.238719	0.140033	NA	NA	NA	NA	NA	NA	NA	NA	NA	NA	NA	NA	NA	NA	NA	NA	NA	NA	NA	NA	NA	NA	NA	NA
473	F80L absent	chr7	132766616	132767361	4.10505	0.793386	293	28	4	132767046	132767068	TGGGTGATGGGACATTCTCTCC	0.000478	6	2	CHCHD3	-140	-	protein_coding	6.32625	6.38457	6.58811	6.74268	0.243606	0.170529	U6	601	+	ND	ND	ND	ND	ND	ND	ND	NA	NA	NA	NA	NA	NA	NA	NA	NA	NA	NA	NA	NA	NA
474	F80L absent	chr7	75157095	75157677	2.51001	-0.364527	147	22	5	75157516	75157538	TGGGCCCTGGGAGGCGGACTTC	9.37e-06	12	1	PMS2P3	92	-	pseudogene	2.62527	2.774	3.37295	3.45286	0.546204	0.216863	NA	NA	NA	NA	NA	NA	NA	NA	NA	NA	NA	NA	NA	NA	NA	NA	NA	NA	NA	NA	NA	NA	NA	NA
475	common	chr19	50163119	50163443	5.88521	2.30406	839	77	7	50163218	50163240	GGGCTGCTGGGAGTTGTAGTTT	1.95e-11	38	0	NA	NA	NA	NA	NA	NA	NA	NA	NA	NA	NA	NA	NA	NA	NA	NA	NA	NA	NA	NA	NA	NA	NA	NA	NA	NA	NA	NA	NA	NA	NA	NA	NA	NA
476	F80L absent	chr17	21121472	21121811	3.41002	0.392317	54	5	3	21121681	21121703	GGGAGTCTGGGAAATGTAGTTG	5.26e-09	6	0	NA	NA	NA	NA	NA	NA	NA	NA	NA	NA	NA	NA	NA	NA	NA	NA	NA	NA	NA	NA	NA	NA	NA	NA	NA	NA	NA	NA	NA	NA	NA	NA	NA	NA
477	common	chr5	178286730	178287044	4.22911	1.31476	431	42	4	178286930	178286952	AGGCCTCTAGGAAATGGAGTCC	1.58e-07	14	1	ZNF354B	67	+	protein_coding	3.24641	3.39369	1.65535	1.30451	-1.86869	2.57563e-16	NA	NA	NA	NA	NA	NA	NA	NA	NA	NA	NA	NA	NA	NA	NA	NA	NA	NA	NA	NA	NA	NA	NA	NA
478	F80L absent	chr19	37157606	37157970	2.83951	0.154861	137	16	3	37157754	37157776	TGTCCTCTGGGAAATGCAGTCC	4.78e-08	1	1	ZNF461	-33	-	protein_coding	1.91073	2.30743	3.36177	3.14241	1.12401	2.1926e-05	NA	NA	NA	NA	NA	NA	NA	NA	NA	NA	NA	NA	NA	NA	NA	NA	NA	NA	NA	NA	NA	NA	NA	NA
479	F80L absent	chr9	78919302	78921058	1.34296	0.523592	27	12	NA	NA	NA	NA	NA	NA	0	NA	NA	NA	NA	NA	NA	NA	NA	NA	NA	NA	NA	NA	NA	NA	NA	NA	NA	NA	NA	NA	NA	NA	NA	NA	NA	NA	NA	NA	NA	NA	NA	NA	NA
480	F80L absent	chr11	47600360	47600685	2.44612	-0.407368	69	9	NA	NA	NA	NA	NA	NA	1	KBTBD4	45	-	protein_coding	3.44361	3.45681	3.44758	3.46728	0.0106953	0.979311	NA	NA	NA	NA	NA	NA	NA	NA	NA	NA	NA	NA	NA	NA	NA	NA	NA	NA	NA	NA	NA	NA	NA	NA
481	F80L absent	chr16	89307352	89307767	2.27746	1.22762	176	29	5	89307393	89307415	GGCAGACCGGGTTCCGCGGTGC	0.000924	107	0	NA	NA	NA	NA	NA	NA	NA	NA	NA	NA	NA	NA	NA	NA	NA	NA	NA	NA	NA	NA	NA	NA	NA	NA	NA	NA	NA	NA	NA	NA	NA	NA	NA	NA
482	F80L absent	chr8	22462018	22462355	1.90203	0	84	19	2	22462144	22462166	GGCAACTGGGGAGCGGAAGTGC	0.000177	20	1	CCAR2	-41	+	protein_coding	6.11873	6.02503	6.01167	6.13812	-0.0672727	0.792182	NA	NA	NA	NA	NA	NA	NA	NA	NA	NA	NA	NA	NA	NA	NA	NA	NA	NA	NA	NA	NA	NA	NA	NA
483	F80L absent	chr12	114867510	114867763	1.68922	-0.734774	25	8	NA	NA	NA	NA	NA	NA	0	NA	NA	NA	NA	NA	NA	NA	NA	NA	NA	NA	NA	NA	NA	NA	NA	NA	NA	NA	NA	NA	NA	NA	NA	NA	NA	NA	NA	NA	NA	NA	NA	NA	NA
484	F80L absent	chr19	19302866	19303124	2.35903	-0.451981	62	11	1	19302697	19302719	ATCCTGGGGGGACCGGTAATTA	0.00059	258	2	MEF2BNB-MEF2B	-28	-	ND	ND	ND	ND	ND	ND	ND	RFXANK	13	+	protein_coding	5.01302	4.97911	4.82883	4.23802	-0.45122	0.105527	NA	NA	NA	NA	NA	NA	NA	NA	NA	NA	NA	NA	NA	NA
485	F80L absent	chr2	86421936	86422607	2.52422	0	170	27	3	86422081	86422103	GTCCTGACGGGAACTGTAGTTC	1.18e-07	26	1	RP11-301O19.1	442	+	antisense	1.1375	1.23266	0.0703893	0.201634	-1.03038	0.509427	NA	NA	NA	NA	NA	NA	NA	NA	NA	NA	NA	NA	NA	NA	NA	NA	NA	NA	NA	NA	NA	NA	NA	NA
486	F80L absent	chr12	125270752	125271435	1.78773	0.193473	110	33	4	125271223	125271245	GGGAGTCGGGGAATTGTAGTCT	4.94e-08	9	0	NA	NA	NA	NA	NA	NA	NA	NA	NA	NA	NA	NA	NA	NA	NA	NA	NA	NA	NA	NA	NA	NA	NA	NA	NA	NA	NA	NA	NA	NA	NA	NA	NA	NA
487	F80L absent	chr19	55800596	55801028	3.32231	0.703148	109	19	6	55800734	55800756	AGGATCATGGGAATTGGAGTTC	5.34e-09	7	0	NA	NA	NA	NA	NA	NA	NA	NA	NA	NA	NA	NA	NA	NA	NA	NA	NA	NA	NA	NA	NA	NA	NA	NA	NA	NA	NA	NA	NA	NA	NA	NA	NA	NA
488	F80L absent	chr1	156053078	156053534	0.913201	-0.419391	53	31	NA	NA	NA	NA	NA	NA	0	NA	NA	NA	NA	NA	NA	NA	NA	NA	NA	NA	NA	NA	NA	NA	NA	NA	NA	NA	NA	NA	NA	NA	NA	NA	NA	NA	NA	NA	NA	NA	NA	NA	NA
489	F80L absent	chr11	67374011	67374629	3.27734	0.938384	335	44	2	67374246	67374268	GGGCTTCTGGGAGATGTGGTCC	5.69e-10	17	2	C11orf72	-143	-	ND	ND	ND	ND	ND	ND	ND	NDUFV1	3	+	protein_coding	6.55228	6.32301	6.53481	6.36964	-0.171063	0.603986	NA	NA	NA	NA	NA	NA	NA	NA	NA	NA	NA	NA	NA	NA
490	common	chr9	95527151	95527448	5.21864	2.26456	741	69	4	95527318	95527340	GGGGCTGTGGGGACAGTAGTCC	4.67e-06	42	1	BICD2	-205	-	protein_coding	3.96625	3.69822	3.71039	3.33056	-0.326419	0.210128	NA	NA	NA	NA	NA	NA	NA	NA	NA	NA	NA	NA	NA	NA	NA	NA	NA	NA	NA	NA	NA	NA	NA	NA
491	F80L absent	chr16	8891369	8891909	3.39908	0.308028	231	31	3	8891564	8891586	TGCACCCTGGGAGTTGCGGTCC	6.3e-08	30	1	TMEM186	-134	-	protein_coding	2.95047	3.16189	3.16672	3.16993	0.0992513	0.845944	NA	NA	NA	NA	NA	NA	NA	NA	NA	NA	NA	NA	NA	NA	NA	NA	NA	NA	NA	NA	NA	NA	NA	NA
492	F80L absent	chr1	44678932	44679357	1.85087	0.407368	58	12	NA	NA	NA	NA	NA	NA	1	DMAP1	-17	+	protein_coding	4.39849	4.20711	4.51223	4.63633	0.374067	0.0607132	NA	NA	NA	NA	NA	NA	NA	NA	NA	NA	NA	NA	NA	NA	NA	NA	NA	NA	NA	NA	NA	NA	NA	NA
493	F80L absent	chr19	54040603	54041131	3.358	0.953393	213	34	5	54040865	54040887	TGGTCTCTGGGAAATGTAGTCC	8.85e-10	16	0	NA	NA	NA	NA	NA	NA	NA	NA	NA	NA	NA	NA	NA	NA	NA	NA	NA	NA	NA	NA	NA	NA	NA	NA	NA	NA	NA	NA	NA	NA	NA	NA	NA	NA
494	common	chr3	49977330	49977683	4.76257	1.33874	554	56	5	49977462	49977484	GGCACGGCGGGAGTAAGAGTCT	6.89e-06	14	1	RBM6	-66	+	protein_coding	5.04002	5.17951	5.51633	5.56377	0.303501	0.0346818	NA	NA	NA	NA	NA	NA	NA	NA	NA	NA	NA	NA	NA	NA	NA	NA	NA	NA	NA	NA	NA	NA	NA	NA
495	F80L absent	chr5	148779234	148779538	3.13235	0.732188	50	7	3	148779488	148779510	GGAAGTCTGGGAAATGTAGTTT	1.88e-09	89	0	NA	NA	NA	NA	NA	NA	NA	NA	NA	NA	NA	NA	NA	NA	NA	NA	NA	NA	NA	NA	NA	NA	NA	NA	NA	NA	NA	NA	NA	NA	NA	NA	NA	NA
496	F80L absent	chr19	40315017	40315570	3.05922	0.672029	174	24	5	40315301	40315323	AGAACTCTGGTTGCTGTAGTTC	1.55e-06	14	0	NA	NA	NA	NA	NA	NA	NA	NA	NA	NA	NA	NA	NA	NA	NA	NA	NA	NA	NA	NA	NA	NA	NA	NA	NA	NA	NA	NA	NA	NA	NA	NA	NA	NA
497	F80L absent	chr12	132195316	132195838	1.24395	-0.150182	64	13	NA	NA	NA	NA	NA	NA	1	SFSWAP	49	+	protein_coding	4.16511	4.17473	4.21568	4.18269	-0.0213979	0.944815	NA	NA	NA	NA	NA	NA	NA	NA	NA	NA	NA	NA	NA	NA	NA	NA	NA	NA	NA	NA	NA	NA	NA	NA
498	F80L absent	chr6	150400724	150401155	2.43748	0	57	18	NA	NA	NA	NA	NA	NA	0	NA	NA	NA	NA	NA	NA	NA	NA	NA	NA	NA	NA	NA	NA	NA	NA	NA	NA	NA	NA	NA	NA	NA	NA	NA	NA	NA	NA	NA	NA	NA	NA	NA	NA
499	F80L absent	chr20	3800787	3801582	3.5662	0.270379	264	33	3	3801354	3801376	GGCACTTCGGGGGTTGTAGTTT	5.18e-08	65	1	AP5S1	-6	+	protein_coding	2.25399	1.848	2.14078	1.83996	-0.120633	0.863662	NA	NA	NA	NA	NA	NA	NA	NA	NA	NA	NA	NA	NA	NA	NA	NA	NA	NA	NA	NA	NA	NA	NA	NA
500	F80L absent	chr11	125438963	125439434	3.43275	0.409346	381	56	3	125439242	125439264	CGGAGACTGGGAAATGTAGTCA	4.86e-07	2	1	EI24	-86	+	protein_coding	6.82056	6.88496	6.54148	6.61589	-0.323914	0.0109137	NA	NA	NA	NA	NA	NA	NA	NA	NA	NA	NA	NA	NA	NA	NA	NA	NA	NA	NA	NA	NA	NA	NA	NA
501	F80L absent	chr1	154842674	154843309	3.34162	1.27269	271	38	1	154842932	154842954	CGAGGACTGGGAACTGTAGTTT	2.92e-06	26	1	KCNN3	-235	-	ND	ND	ND	ND	ND	ND	ND	NA	NA	NA	NA	NA	NA	NA	NA	NA	NA	NA	NA	NA	NA	NA	NA	NA	NA	NA	NA	NA	NA	NA	NA
502	F80L absent	chr9	40791942	40792370	2.87792	0.235296	64	9	4	40792181	40792203	GGGCTTACGGGAACTGTAGTTA	6.83e-08	9	0	NA	NA	NA	NA	NA	NA	NA	NA	NA	NA	NA	NA	NA	NA	NA	NA	NA	NA	NA	NA	NA	NA	NA	NA	NA	NA	NA	NA	NA	NA	NA	NA	NA	NA
503	common	chr19	488974	489222	5.55185	2.13032	1334	131	5	489074	489096	GGCATGGCGGGAGTTGTGGTTC	9.75e-09	10	1	MADCAM1	78	+	ND	ND	ND	ND	ND	ND	ND	NA	NA	NA	NA	NA	NA	NA	NA	NA	NA	NA	NA	NA	NA	NA	NA	NA	NA	NA	NA	NA	NA	NA	NA
504	F80L absent	chr3	156272655	156273321	3.06241	0.247899	166	25	3	156273059	156273081	AGGCTTCCGGGCGTGATTGGGC	0.000369	12	1	SSR3	-15	-	protein_coding	6.2363	6.30561	6.21587	6.25626	-0.12788	0.444871	NA	NA	NA	NA	NA	NA	NA	NA	NA	NA	NA	NA	NA	NA	NA	NA	NA	NA	NA	NA	NA	NA	NA	NA
505	F80L absent	chr10	126489925	126490747	2.73568	0.413587	333	68	5	126490306	126490328	GGCATCATGGGAAGTGGAGTCT	1.09e-08	1	1	FAM175B	18	+	protein_coding	4.0505	4.14975	4.23036	4.32697	0.155734	0.523124	NA	NA	NA	NA	NA	NA	NA	NA	NA	NA	NA	NA	NA	NA	NA	NA	NA	NA	NA	NA	NA	NA	NA	NA
506	F80L absent	chr20	25990117	25990652	2.76665	0.167554	140	22	3	25990353	25990375	AATCCTCCGGGAAATGTAGTCC	3.22e-07	52	0	NA	NA	NA	NA	NA	NA	NA	NA	NA	NA	NA	NA	NA	NA	NA	NA	NA	NA	NA	NA	NA	NA	NA	NA	NA	NA	NA	NA	NA	NA	NA	NA	NA	NA
507	common	chr5	177018965	177019248	4.77138	1.44947	539	65	2	177019131	177019153	TGCCTGCCGGGACCGCGAGTTC	4.13e-06	16	1	TMED9	53	+	protein_coding	5.53201	5.25626	5.50938	5.56712	0.124002	0.690663	NA	NA	NA	NA	NA	NA	NA	NA	NA	NA	NA	NA	NA	NA	NA	NA	NA	NA	NA	NA	NA	NA	NA	NA
508	F80L absent	chr1	156698186	156698607	1.42058	0.102289	74	25	NA	NA	NA	NA	NA	NA	2	RRNAD1	-162	+	protein_coding	3.66903	3.45812	3.42761	3.39369	-0.357529	0.368869	ISG20L2	195	-	protein_coding	4.64674	5.04876	5.1469	5.20906	0.139605	0.543533	NA	NA	NA	NA	NA	NA	NA	NA	NA	NA	NA	NA	NA	NA
509	F80L absent	chr2	236402068	236402633	4.06195	0.798	306	32	2	236402494	236402516	GGCTTCCTGGGACTTGTAGTCC	6.29e-10	9	1	AGAP1	383	+	protein_coding	3.02326	2.83996	2.98185	3.14078	0.113086	0.710966	NA	NA	NA	NA	NA	NA	NA	NA	NA	NA	NA	NA	NA	NA	NA	NA	NA	NA	NA	NA	NA	NA	NA	NA
510	F80L absent	chr9	140617218	140617635	1.3268	-0.709666	64	21	NA	NA	NA	NA	NA	NA	0	NA	NA	NA	NA	NA	NA	NA	NA	NA	NA	NA	NA	NA	NA	NA	NA	NA	NA	NA	NA	NA	NA	NA	NA	NA	NA	NA	NA	NA	NA	NA	NA	NA	NA
511	common	chrX	48980127	48980474	3.98024	1.11402	446	56	4	48980262	48980284	AGCGCCCAGGGAAATGTAGTTT	2.9e-07	27	1	GPKOW	-149	-	protein_coding	3.92315	3.52482	4.02591	4.04264	0.276045	0.422665	NA	NA	NA	NA	NA	NA	NA	NA	NA	NA	NA	NA	NA	NA	NA	NA	NA	NA	NA	NA	NA	NA	NA	NA
512	F80L absent	chrX	69653976	69654648	2.95962	0.406444	279	34	2	69654350	69654372	GACTCACTGGGAATTGTAGTTC	7.59e-08	5	0	NA	NA	NA	NA	NA	NA	NA	NA	NA	NA	NA	NA	NA	NA	NA	NA	NA	NA	NA	NA	NA	NA	NA	NA	NA	NA	NA	NA	NA	NA	NA	NA	NA	NA
513	common	chr1	228759856	228762435	0.353905	-1.30841	273	90	NA	NA	NA	NA	NA	NA	1	RNA5S8	629	-	ND	ND	ND	ND	ND	ND	ND	NA	NA	NA	NA	NA	NA	NA	NA	NA	NA	NA	NA	NA	NA	NA	NA	NA	NA	NA	NA	NA	NA	NA	NA
514	common	chr8	144699551	144699977	5.57542	2.53443	2059	258	6	144699790	144699812	GCACAGCTGGGACTTGGAGTCC	1.66e-06	10	1	TSTA3	454	-	protein_coding	5.04701	4.68818	5.00225	4.86987	0.0156026	0.97458	NA	NA	NA	NA	NA	NA	NA	NA	NA	NA	NA	NA	NA	NA	NA	NA	NA	NA	NA	NA	NA	NA	NA	NA
515	F80L absent	chr11	61129184	61129879	3.31807	0.567736	232	33	5	61129445	61129467	GGCGCGCTGGGAGCCGGCCACC	0.00036	5	2	TMEM138	-58	+	protein_coding	4.17393	4.52982	4.23726	4.35685	0.108482	0.834694	CYB561A3	240	-	protein_coding	3.49442	3.51475	4.10434	3.93546	0.260899	0.41024	NA	NA	NA	NA	NA	NA	NA	NA	NA	NA	NA	NA	NA	NA
516	F80L absent	chr2	37551866	37552460	3.0324	0.209758	280	31	3	37552052	37552074	CGCCCGCCGGGAGGTGGCCGCG	0.000485	37	2	PRKD3	-212	-	protein_coding	5.1643	5.22419	5.32841	5.17473	0.0395256	0.863022	AC007391.2	320	+	ND	ND	ND	ND	ND	ND	ND	NA	NA	NA	NA	NA	NA	NA	NA	NA	NA	NA	NA	NA	NA
517	F80L absent	chr19	56632661	56632983	1.76926	-0.318644	93	17	NA	NA	NA	NA	NA	NA	1	ZNF787	-173	-	protein_coding	2.79077	2.11437	2.19849	1.87184	-0.413699	0.454387	NA	NA	NA	NA	NA	NA	NA	NA	NA	NA	NA	NA	NA	NA	NA	NA	NA	NA	NA	NA	NA	NA	NA	NA
518	common	chr2	241580865	241581302	1.08924	-4.14296	156	0	1	241581310	241581332	GGACACTAGGGACACCTAGTGT	0.000899	113	0	NA	NA	NA	NA	NA	NA	NA	NA	NA	NA	NA	NA	NA	NA	NA	NA	NA	NA	NA	NA	NA	NA	NA	NA	NA	NA	NA	NA	NA	NA	NA	NA	NA	NA
519	F80L absent	chr20	37020950	37021279	2.75021	0	66	6	2	37021130	37021152	GGGGTGCTGGGAAATGTAGTTC	3.76e-10	3	0	NA	NA	NA	NA	NA	NA	NA	NA	NA	NA	NA	NA	NA	NA	NA	NA	NA	NA	NA	NA	NA	NA	NA	NA	NA	NA	NA	NA	NA	NA	NA	NA	NA	NA
520	F80L absent	chr3	50126123	50126621	2.84883	0.0671454	103	17	2	50126252	50126274	GGGCTGCCGGGAAATGTGGTCG	4.65e-08	7	1	RBM5	-31	+	protein_coding	6.01748	6.20653	6.40259	6.57577	0.198605	0.187054	NA	NA	NA	NA	NA	NA	NA	NA	NA	NA	NA	NA	NA	NA	NA	NA	NA	NA	NA	NA	NA	NA	NA	NA
521	common	chr17	19912382	19912728	6.1771	2.2008	1333	155	3	19912580	19912602	GGCTCGCTGGGAGATGTAGTAC	8.9e-09	26	2	RP11-209D14.2	-8	-	ND	ND	ND	ND	ND	ND	ND	SPECC1	102	+	protein_coding	4.63169	4.65421	4.67525	5.21023	0.0566529	0.874824	NA	NA	NA	NA	NA	NA	NA	NA	NA	NA	NA	NA	NA	NA
522	F80L absent	chr6	1319025	1321363	-0.145857	-0.781657	221	156	NA	NA	NA	NA	NA	NA	0	NA	NA	NA	NA	NA	NA	NA	NA	NA	NA	NA	NA	NA	NA	NA	NA	NA	NA	NA	NA	NA	NA	NA	NA	NA	NA	NA	NA	NA	NA	NA	NA	NA	NA
523	F80L absent	chr7	2074830	2075941	0.867912	-0.0886455	84	52	NA	NA	NA	NA	NA	NA	0	NA	NA	NA	NA	NA	NA	NA	NA	NA	NA	NA	NA	NA	NA	NA	NA	NA	NA	NA	NA	NA	NA	NA	NA	NA	NA	NA	NA	NA	NA	NA	NA	NA	NA
524	F80L absent	chr19	7580605	7581049	4.13805	1.48516	338	50	4	7580945	7580967	GAGCTGCTGGGACTTGTAGTTC	9.45e-09	23	0	NA	NA	NA	NA	NA	NA	NA	NA	NA	NA	NA	NA	NA	NA	NA	NA	NA	NA	NA	NA	NA	NA	NA	NA	NA	NA	NA	NA	NA	NA	NA	NA	NA	NA
525	common	chr1	159915300	159915791	4.94913	1.80994	734	107	2	159915531	159915553	AGCGGCCTGGGAGTTGTAGTTT	1.33e-08	13	1	IGSF9	-159	-	ND	ND	ND	ND	ND	ND	ND	NA	NA	NA	NA	NA	NA	NA	NA	NA	NA	NA	NA	NA	NA	NA	NA	NA	NA	NA	NA	NA	NA	NA	NA
526	common	chr19	38714773	38715223	5.19969	2.35264	1227	136	3	38714932	38714954	GCCATGCTGGGAGTGGTAGTCC	6.7e-09	11	0	NA	NA	NA	NA	NA	NA	NA	NA	NA	NA	NA	NA	NA	NA	NA	NA	NA	NA	NA	NA	NA	NA	NA	NA	NA	NA	NA	NA	NA	NA	NA	NA	NA	NA
527	F80L absent	chr5	83629	85654	0.335509	-1.19597	293	106	NA	NA	NA	NA	NA	NA	0	NA	NA	NA	NA	NA	NA	NA	NA	NA	NA	NA	NA	NA	NA	NA	NA	NA	NA	NA	NA	NA	NA	NA	NA	NA	NA	NA	NA	NA	NA	NA	NA	NA	NA
528	F80L absent	chr22	19466492	19467341	2.54379	0.325986	216	36	3	19466960	19466982	TGCATTGTGGGTAGTGTAGTCG	8.95e-08	16	2	UFD1L	-178	-	protein_coding	5.63865	5.84925	5.43162	5.75916	-0.133795	0.687956	CDC45	66	+	protein_coding	5.77847	5.76977	5.23917	5.46891	-0.5095	3.08898e-05	NA	NA	NA	NA	NA	NA	NA	NA	NA	NA	NA	NA	NA	NA
529	F80L absent	chr19	49990520	49990838	1.625	-0.411265	56	15	NA	NA	NA	NA	NA	NA	1	RPL13A	132	+	protein_coding	11.0614	11	10.7818	10.9441	-0.287913	0.0143916	NA	NA	NA	NA	NA	NA	NA	NA	NA	NA	NA	NA	NA	NA	NA	NA	NA	NA	NA	NA	NA	NA	NA	NA
530	F80L absent	chr19	49478719	49480268	2.81884	0.574236	489	85	9	49479591	49479613	AGGCTTCTGGGAGTTAGAGTTC	1.85e-08	7	0	NA	NA	NA	NA	NA	NA	NA	NA	NA	NA	NA	NA	NA	NA	NA	NA	NA	NA	NA	NA	NA	NA	NA	NA	NA	NA	NA	NA	NA	NA	NA	NA	NA	NA
531	common	chr18	55837652	55838295	1.0485	-1.39641	71	15	NA	NA	NA	NA	NA	NA	0	NA	NA	NA	NA	NA	NA	NA	NA	NA	NA	NA	NA	NA	NA	NA	NA	NA	NA	NA	NA	NA	NA	NA	NA	NA	NA	NA	NA	NA	NA	NA	NA	NA	NA
532	common	chr19	39390195	39390627	4.74337	1.1666	567	66	5	39390400	39390422	CGCCTTCTGGGACTCGTAGTCC	6e-09	2	2	NFKBIB	-71	+	protein_coding	2.98732	2.31325	2.18587	2.0635	-0.52334	0.268013	SIRT2	91	-	protein_coding	4.37295	4.24108	3.9855	3.96347	-0.44649	0.0119949	NA	NA	NA	NA	NA	NA	NA	NA	NA	NA	NA	NA	NA	NA
533	F80L absent	chr6	44019988	44020516	2.57441	0.662744	56	11	5	44020358	44020380	AGGAGACTGGGAAATGTAGTTT	1.64e-08	3	0	NA	NA	NA	NA	NA	NA	NA	NA	NA	NA	NA	NA	NA	NA	NA	NA	NA	NA	NA	NA	NA	NA	NA	NA	NA	NA	NA	NA	NA	NA	NA	NA	NA	NA
534	F80L absent	chr10	114602856	114603138	3.49151	-0.197127	29	4	NA	NA	NA	NA	NA	NA	0	NA	NA	NA	NA	NA	NA	NA	NA	NA	NA	NA	NA	NA	NA	NA	NA	NA	NA	NA	NA	NA	NA	NA	NA	NA	NA	NA	NA	NA	NA	NA	NA	NA	NA
535	common	chr19	58978158	58978540	3.30505	0.244934	291	41	4	58978260	58978282	GGGGCGCTGGGAAATGGAGTCG	1.25e-07	9	1	ZNF324	74	+	protein_coding	2.80116	2.58256	3.08406	2.78869	0.212704	0.558565	NA	NA	NA	NA	NA	NA	NA	NA	NA	NA	NA	NA	NA	NA	NA	NA	NA	NA	NA	NA	NA	NA	NA	NA
536	F80L absent	chr19	44555747	44556448	3.7972	0.971442	313	44	6	44556129	44556151	GGAATTCTGGGGAGTGGAGTCC	5.01e-08	21	1	ZNF223	-577	+	protein_coding	1.30451	1.91456	1.37295	1.33914	-0.344228	0.551597	NA	NA	NA	NA	NA	NA	NA	NA	NA	NA	NA	NA	NA	NA	NA	NA	NA	NA	NA	NA	NA	NA	NA	NA
537	F80L absent	chr7	929393	930014	1.51484	-0.81785	103	20	NA	NA	NA	NA	NA	NA	0	NA	NA	NA	NA	NA	NA	NA	NA	NA	NA	NA	NA	NA	NA	NA	NA	NA	NA	NA	NA	NA	NA	NA	NA	NA	NA	NA	NA	NA	NA	NA	NA	NA	NA
538	F80L absent	chr6	46620465	46621192	3.17337	0.72602	311	61	1	46620676	46620698	AGGTTACTGGGCAATGTAGTCC	2.07e-07	9	2	CYP39A1	-305	-	protein_coding	1.7137	1.9222	2.07039	1.32193	-0.206989	0.738507	SLC25A27	-150	+	protein_coding	2.85	3.38128	3.41954	3.47897	0.218659	0.684835	NA	NA	NA	NA	NA	NA	NA	NA	NA	NA	NA	NA	NA	NA
539	F80L absent	chr9	139668051	139668503	2.9618	0.53449	171	31	3	139668302	139668324	GGGATGCTGGGAAGTGTAGTCT	1.46e-10	7	0	NA	NA	NA	NA	NA	NA	NA	NA	NA	NA	NA	NA	NA	NA	NA	NA	NA	NA	NA	NA	NA	NA	NA	NA	NA	NA	NA	NA	NA	NA	NA	NA	NA	NA
540	F80L absent	chr11	74659976	74660498	3.39435	0.831903	218	29	3	74660227	74660249	AGTCAATCGGGATCCGTAGTTT	7.75e-05	27	2	XRRA1	8	-	protein_coding	1.58976	1.51096	2.30451	2.45681	0.801308	0.00634239	SPCS2	55	+	protein_coding	6.34784	6.40003	6.54643	6.72151	0.236933	0.173126	NA	NA	NA	NA	NA	NA	NA	NA	NA	NA	NA	NA	NA	NA
541	common	chr10	60094485	60094851	4.84085	2.17222	646	94	2	60094656	60094678	GGCACACTGGGAAGTGTAGTTC	1.53e-09	11	1	UBE2D1	67	+	protein_coding	4.80478	4.98778	4.35896	4.3799	-0.560626	3.54474e-05	NA	NA	NA	NA	NA	NA	NA	NA	NA	NA	NA	NA	NA	NA	NA	NA	NA	NA	NA	NA	NA	NA	NA	NA
542	common	chr19	39881652	39881998	4.03029	0.984832	331	41	1	39881776	39881798	CGCCTTCGGGGAAATGAAGTCC	2.19e-07	17	2	PAF1	10	-	protein_coding	5.84449	5.75702	5.57289	5.76871	-0.140022	0.636421	MED29	118	+	protein_coding	3.93357	3.54102	3.3799	3.39643	-0.320544	0.147295	NA	NA	NA	NA	NA	NA	NA	NA	NA	NA	NA	NA	NA	NA
543	F80L absent	chr3	61236704	61237353	3.30028	0.55849	225	34	2	61237121	61237143	GGTCTTCTGGGAATTGCAGTCC	6.85e-09	7	1	FHIT	105	-	protein_coding	0.613532	0.687061	2.53107	2.11437	1.54248	0.000600416	NA	NA	NA	NA	NA	NA	NA	NA	NA	NA	NA	NA	NA	NA	NA	NA	NA	NA	NA	NA	NA	NA	NA	NA
544	F80L absent	chr2	123616831	123617233	2.41114	0	44	5	NA	NA	NA	NA	NA	NA	0	NA	NA	NA	NA	NA	NA	NA	NA	NA	NA	NA	NA	NA	NA	NA	NA	NA	NA	NA	NA	NA	NA	NA	NA	NA	NA	NA	NA	NA	NA	NA	NA	NA	NA
545	F80L absent	chr11	58345564	58346106	4.16658	0.759583	128	19	4	58345765	58345787	GTCACGACGGGAAAGGTAGTTT	7.8e-07	5	1	LPXN	-142	-	ND	ND	ND	ND	ND	ND	ND	NA	NA	NA	NA	NA	NA	NA	NA	NA	NA	NA	NA	NA	NA	NA	NA	NA	NA	NA	NA	NA	NA	NA	NA
546	F80L absent	chr3	183851785	183852238	3.77436	1.21926	126	20	2	183851988	183852010	TGCACGTCGGGATTTGGAGTTC	1.17e-07	7	0	NA	NA	NA	NA	NA	NA	NA	NA	NA	NA	NA	NA	NA	NA	NA	NA	NA	NA	NA	NA	NA	NA	NA	NA	NA	NA	NA	NA	NA	NA	NA	NA	NA	NA
547	common	chr3	46036970	46037531	4.8626	1.5031	507	67	3	46037359	46037381	AGTCCGATGGGAGTTGCAGGCC	2.34e-06	4	1	FYCO1	66	-	protein_coding	2.65992	2.46728	1.20789	1.34483	-1.30993	9.24123e-12	NA	NA	NA	NA	NA	NA	NA	NA	NA	NA	NA	NA	NA	NA	NA	NA	NA	NA	NA	NA	NA	NA	NA	NA
548	common	chr16	3332760	3333182	4.88247	1.39234	445	62	4	3332899	3332921	GGCCTGCTGGGAGATGCAGTCC	1.39e-09	7	0	NA	NA	NA	NA	NA	NA	NA	NA	NA	NA	NA	NA	NA	NA	NA	NA	NA	NA	NA	NA	NA	NA	NA	NA	NA	NA	NA	NA	NA	NA	NA	NA	NA	NA
549	F80L absent	chr20	17834984	17835359	3.81064	0.424885	49	8	NA	NA	NA	NA	NA	NA	0	NA	NA	NA	NA	NA	NA	NA	NA	NA	NA	NA	NA	NA	NA	NA	NA	NA	NA	NA	NA	NA	NA	NA	NA	NA	NA	NA	NA	NA	NA	NA	NA	NA	NA
550	F80L absent	chr9	72435349	72436034	3.2748	0.336246	166	22	3	72435526	72435548	TGCATCCTGGGATCCGCAGTTT	2.89e-07	27	2	C9orf135-AS1	-36	-	ND	ND	ND	ND	ND	ND	ND	C9orf135	18	+	ND	ND	ND	ND	ND	ND	ND	NA	NA	NA	NA	NA	NA	NA	NA	NA	NA	NA	NA	NA	NA
551	F80L absent	chr19	51231693	51232092	2.95109	0.719892	112	24	3	51231910	51231932	GGTACTCTGGAAAATGTAGTCC	2.66e-08	24	0	NA	NA	NA	NA	NA	NA	NA	NA	NA	NA	NA	NA	NA	NA	NA	NA	NA	NA	NA	NA	NA	NA	NA	NA	NA	NA	NA	NA	NA	NA	NA	NA	NA	NA
552	F80L absent	chr21	40407439	40407797	1.87874	0.701018	28	12	NA	NA	NA	NA	NA	NA	0	NA	NA	NA	NA	NA	NA	NA	NA	NA	NA	NA	NA	NA	NA	NA	NA	NA	NA	NA	NA	NA	NA	NA	NA	NA	NA	NA	NA	NA	NA	NA	NA	NA	NA
553	F80L absent	chr1	18779225	18779493	2.90767	2.1196	25	9	NA	NA	NA	NA	NA	NA	0	NA	NA	NA	NA	NA	NA	NA	NA	NA	NA	NA	NA	NA	NA	NA	NA	NA	NA	NA	NA	NA	NA	NA	NA	NA	NA	NA	NA	NA	NA	NA	NA	NA	NA
554	F80L absent	chr19	48847997	48848554	2.25929	0.353795	227	45	7	48848324	48848346	GGGCTGCTGGGAGTTGTAGTCC	1.61e-11	8	0	NA	NA	NA	NA	NA	NA	NA	NA	NA	NA	NA	NA	NA	NA	NA	NA	NA	NA	NA	NA	NA	NA	NA	NA	NA	NA	NA	NA	NA	NA	NA	NA	NA	NA
555	F80L absent	chr5	92826731	92827079	1.58536	-0.278409	70	20	10	92826786	92826808	GTGTTGATGGTGGTTGTAGTCA	6.26e-05	14	0	NA	NA	NA	NA	NA	NA	NA	NA	NA	NA	NA	NA	NA	NA	NA	NA	NA	NA	NA	NA	NA	NA	NA	NA	NA	NA	NA	NA	NA	NA	NA	NA	NA	NA
556	common	chr9	115912973	115913388	4.84658	2.45355	1065	172	2	115913190	115913212	GGGCGCCTGGGAGTTGTGGTCC	2.03e-08	0	1	SLC31A2	42	+	protein_coding	2.80735	2.90111	3.2555	3.28836	0.373459	0.20409	NA	NA	NA	NA	NA	NA	NA	NA	NA	NA	NA	NA	NA	NA	NA	NA	NA	NA	NA	NA	NA	NA	NA	NA
557	common	chr19	49361793	49362263	4.12505	1.39404	409	76	2	49362070	49362092	GGCCTGATGGGAAACGTAGTCC	1.72e-09	3	0	NA	NA	NA	NA	NA	NA	NA	NA	NA	NA	NA	NA	NA	NA	NA	NA	NA	NA	NA	NA	NA	NA	NA	NA	NA	NA	NA	NA	NA	NA	NA	NA	NA	NA
558	common	chr2	65357196	65357548	6.01637	2.64937	937	119	4	65357387	65357409	CGCTTGGCGGGAAGCTGAGTCC	6.1e-05	9	1	RAB1A	-132	-	protein_coding	5.7811	5.81813	6.10832	6.02503	0.242313	0.0637558	NA	NA	NA	NA	NA	NA	NA	NA	NA	NA	NA	NA	NA	NA	NA	NA	NA	NA	NA	NA	NA	NA	NA	NA
559	common	chr17	43225589	43225885	4.69678	2.23948	489	63	2	43225739	43225761	GGGGCGCCGGGAGTCGTAGTTC	7.49e-08	14	0	NA	NA	NA	NA	NA	NA	NA	NA	NA	NA	NA	NA	NA	NA	NA	NA	NA	NA	NA	NA	NA	NA	NA	NA	NA	NA	NA	NA	NA	NA	NA	NA	NA	NA
560	common	chr15	64455330	64455611	4.54062	1.29505	249	36	4	64455503	64455525	AGCATGCCGGGGCTTGTGGTCT	1.85e-07	10	1	PPIB	-66	-	protein_coding	7.22072	7.23726	7.00944	7.25937	-0.108662	0.705282	NA	NA	NA	NA	NA	NA	NA	NA	NA	NA	NA	NA	NA	NA	NA	NA	NA	NA	NA	NA	NA	NA	NA	NA
561	F80L absent	chr7	33102067	33102951	2.82544	0.354949	224	37	2	33102739	33102761	AGCCTTCTGGGGGTCGGAGTCC	4.25e-08	10	1	NT5C3A	-100	-	protein_coding	4.90785	5.05441	4.8674	4.95745	-0.115531	0.688339	NA	NA	NA	NA	NA	NA	NA	NA	NA	NA	NA	NA	NA	NA	NA	NA	NA	NA	NA	NA	NA	NA	NA	NA
562	common	chr22	46692547	46692874	3.66841	0.75269	280	41	3	46692691	46692713	TGCGTCCTGGGTATTGTAGTCA	7.06e-08	18	1	GTSE1	-72	+	protein_coding	4.5601	4.43029	4.09845	4.06609	-0.406153	0.054039	NA	NA	NA	NA	NA	NA	NA	NA	NA	NA	NA	NA	NA	NA	NA	NA	NA	NA	NA	NA	NA	NA	NA	NA
563	F80L absent	chr12	75905324	75905778	3.00283	0.703342	72	11	3	75905601	75905623	TGCGTACTGGGACTTGTAGTTT	1.18e-08	15	1	KRR1	-135	-	protein_coding	5.96694	6.06609	6.10518	6.31796	0.0551044	0.802804	NA	NA	NA	NA	NA	NA	NA	NA	NA	NA	NA	NA	NA	NA	NA	NA	NA	NA	NA	NA	NA	NA	NA	NA
564	common	chr5	178322678	178323208	4.11973	0.872803	539	74	5	178322883	178322905	AGCCTTGTGGGAAATGTAGTCT	2.73e-10	19	1	ZFP2	-48	+	ND	ND	ND	ND	ND	ND	ND	NA	NA	NA	NA	NA	NA	NA	NA	NA	NA	NA	NA	NA	NA	NA	NA	NA	NA	NA	NA	NA	NA	NA	NA
565	common	chr7	140396520	140397138	4.26465	1.06357	478	59	6	140396748	140396770	GGCATGCTGGGACCTGTAGTCC	3.06e-10	1	1	NDUFB2-AS1	48	-	ND	ND	ND	ND	ND	ND	ND	NA	NA	NA	NA	NA	NA	NA	NA	NA	NA	NA	NA	NA	NA	NA	NA	NA	NA	NA	NA	NA	NA	NA	NA
566	F80L absent	chr1	154979087	154980273	3.22925	0.714755	287	47	4	154979448	154979470	TGTACCTTGGGAGTTGTAGTCC	2.05e-08	1	0	NA	NA	NA	NA	NA	NA	NA	NA	NA	NA	NA	NA	NA	NA	NA	NA	NA	NA	NA	NA	NA	NA	NA	NA	NA	NA	NA	NA	NA	NA	NA	NA	NA	NA
567	common	chr12	133706653	133707097	4.83937	2.51074	581	95	1	133706870	133706892	GAGCTCCTGGGAAACGTAGTTC	4.61e-08	15	2	ZNF891	184	-	protein_coding	1.57531	1.99639	2.58015	2.37295	0.73203	0.0100817	ZNF10	286	+	protein_coding	2.0635	2.34199	2.56316	2.37295	0.160032	0.691424	NA	NA	NA	NA	NA	NA	NA	NA	NA	NA	NA	NA	NA	NA
568	F80L absent	chr19	6812103	6812664	1.23732	-0.200028	76	28	NA	NA	NA	NA	NA	NA	0	NA	NA	NA	NA	NA	NA	NA	NA	NA	NA	NA	NA	NA	NA	NA	NA	NA	NA	NA	NA	NA	NA	NA	NA	NA	NA	NA	NA	NA	NA	NA	NA	NA	NA
569	F80L absent	chr1	227923509	227923747	1.68223	-0.315046	47	14	8	227923521	227923543	AGGACGGTGGCACTTGGAGGGG	0.000453	23	0	NA	NA	NA	NA	NA	NA	NA	NA	NA	NA	NA	NA	NA	NA	NA	NA	NA	NA	NA	NA	NA	NA	NA	NA	NA	NA	NA	NA	NA	NA	NA	NA	NA	NA
570	common	chr17	7094834	7095207	4.57475	1.80174	562	86	5	7094997	7095019	GGGCTGCTGGGAAATGTAGTCC	2.21e-11	9	0	NA	NA	NA	NA	NA	NA	NA	NA	NA	NA	NA	NA	NA	NA	NA	NA	NA	NA	NA	NA	NA	NA	NA	NA	NA	NA	NA	NA	NA	NA	NA	NA	NA	NA
571	F80L absent	chrX	39641262	39641837	2.26653	0.405129	123	31	4	39641672	39641694	ATAGCGCTGGGGCTAGGAGCCT	0.00083	18	0	NA	NA	NA	NA	NA	NA	NA	NA	NA	NA	NA	NA	NA	NA	NA	NA	NA	NA	NA	NA	NA	NA	NA	NA	NA	NA	NA	NA	NA	NA	NA	NA	NA	NA
572	F80L absent	chr9	139474903	139476282	0.342629	-0.825542	95	38	NA	NA	NA	NA	NA	NA	0	NA	NA	NA	NA	NA	NA	NA	NA	NA	NA	NA	NA	NA	NA	NA	NA	NA	NA	NA	NA	NA	NA	NA	NA	NA	NA	NA	NA	NA	NA	NA	NA	NA	NA
573	common	chr1	46152582	46153044	6.381	3.02246	1048	163	2	46152822	46152844	TACCCGCTGGGAGTAGTAGTTC	9.44e-08	7	1	TMEM69	73	+	protein_coding	4.84699	4.69265	4.96671	5.08874	0.147258	0.55298	NA	NA	NA	NA	NA	NA	NA	NA	NA	NA	NA	NA	NA	NA	NA	NA	NA	NA	NA	NA	NA	NA	NA	NA
574	F80L absent	chr19	41755542	41755897	2.02847	-0.312138	64	13	NA	NA	NA	NA	NA	NA	0	NA	NA	NA	NA	NA	NA	NA	NA	NA	NA	NA	NA	NA	NA	NA	NA	NA	NA	NA	NA	NA	NA	NA	NA	NA	NA	NA	NA	NA	NA	NA	NA	NA	NA
575	common	chr12	93835649	93835957	5.41882	2.26382	728	103	2	93835784	93835806	GGCCCCTCGGGAAATGTAGTCC	1.15e-08	7	1	UBE2N	235	-	protein_coding	6.32373	6.58931	6.44857	6.58586	0.0771583	0.792554	NA	NA	NA	NA	NA	NA	NA	NA	NA	NA	NA	NA	NA	NA	NA	NA	NA	NA	NA	NA	NA	NA	NA	NA
576	F80L absent	chr19	50314630	50315234	1.87272	0.075849	104	33	3	50314809	50314831	GGGCTGCTGGGAACTGTAGTTC	1.24e-10	57	0	NA	NA	NA	NA	NA	NA	NA	NA	NA	NA	NA	NA	NA	NA	NA	NA	NA	NA	NA	NA	NA	NA	NA	NA	NA	NA	NA	NA	NA	NA	NA	NA	NA	NA
577	F80L absent	chr1	59527376	59527824	2.42898	0.617341	52	7	2	59527641	59527663	GGCAGGCTGGGAAATGTAGTCA	4.39e-09	41	0	NA	NA	NA	NA	NA	NA	NA	NA	NA	NA	NA	NA	NA	NA	NA	NA	NA	NA	NA	NA	NA	NA	NA	NA	NA	NA	NA	NA	NA	NA	NA	NA	NA	NA
578	common	chr17	25783317	25783539	4.21072	1.76333	539	97	4	25783392	25783414	GGCATGCTGGGACTTGTAGTCC	2.36e-11	12	1	KSR1	242	+	protein_coding	3.05658	2.92979	3.04089	3.3978	0.388205	0.148611	NA	NA	NA	NA	NA	NA	NA	NA	NA	NA	NA	NA	NA	NA	NA	NA	NA	NA	NA	NA	NA	NA	NA	NA
579	F80L absent	chr16	9233311	9234434	2.15656	0.173819	79	24	NA	NA	NA	NA	NA	NA	0	NA	NA	NA	NA	NA	NA	NA	NA	NA	NA	NA	NA	NA	NA	NA	NA	NA	NA	NA	NA	NA	NA	NA	NA	NA	NA	NA	NA	NA	NA	NA	NA	NA	NA
580	F80L absent	chrX	106361569	106362259	2.64631	0.542419	124	25	4	106362045	106362067	GGAGTTCTGGGACTTGAGGTCC	4.35e-07	6	1	RBM41	143	-	protein_coding	3.65306	3.71039	4.01881	4.10014	0.203475	0.377447	NA	NA	NA	NA	NA	NA	NA	NA	NA	NA	NA	NA	NA	NA	NA	NA	NA	NA	NA	NA	NA	NA	NA	NA
581	F80L absent	chr9	35079782	35080240	3.35606	0.933276	196	29	4	35080047	35080069	TGCATGCTGGGAGTCGTAGTAC	4.14e-09	23	1	FANCG	2	-	protein_coding	5.01078	5.1177	4.90304	5.07639	-0.254307	0.209481	NA	NA	NA	NA	NA	NA	NA	NA	NA	NA	NA	NA	NA	NA	NA	NA	NA	NA	NA	NA	NA	NA	NA	NA
582	F80L absent	chr2	75873756	75874482	3.05506	0.991953	236	41	3	75874132	75874154	TCCCCCGTGGGACGCCGGGTTG	0.00099	108	1	MRPL19	-210	+	protein_coding	5.67553	5.73877	4.65421	4.64212	-1.10139	6.32212e-16	NA	NA	NA	NA	NA	NA	NA	NA	NA	NA	NA	NA	NA	NA	NA	NA	NA	NA	NA	NA	NA	NA	NA	NA
583	common	chr7	591461	591741	1.24824	-1.01066	49	10	9	591692	591714	ACCTGGGTGGGAGGTGGGGGTT	0.00018	6	0	NA	NA	NA	NA	NA	NA	NA	NA	NA	NA	NA	NA	NA	NA	NA	NA	NA	NA	NA	NA	NA	NA	NA	NA	NA	NA	NA	NA	NA	NA	NA	NA	NA	NA
584	F80L absent	chr5	178450540	178450970	2.75883	0.0817378	167	32	3	178450724	178450746	CGACGTCTGGGAAATGAAGTCC	2.51e-07	45	1	ZNF879	-2	+	protein_coding	1.0072	0.678072	0.454176	0.333424	-0.60489	0.272611	NA	NA	NA	NA	NA	NA	NA	NA	NA	NA	NA	NA	NA	NA	NA	NA	NA	NA	NA	NA	NA	NA	NA	NA
585	common	chr11	64691597	64692239	4.9133	2.26664	790	140	3	64692068	64692090	GGGCCGCTGGGAGATGTAGTCC	1.76e-10	16	0	NA	NA	NA	NA	NA	NA	NA	NA	NA	NA	NA	NA	NA	NA	NA	NA	NA	NA	NA	NA	NA	NA	NA	NA	NA	NA	NA	NA	NA	NA	NA	NA	NA	NA
586	F80L absent	chr17	40559385	40559924	4.85086	1.73884	237	46	6	40559682	40559704	TGCCTGCTGGGAGGTGTAGTTG	1.37e-09	11	0	NA	NA	NA	NA	NA	NA	NA	NA	NA	NA	NA	NA	NA	NA	NA	NA	NA	NA	NA	NA	NA	NA	NA	NA	NA	NA	NA	NA	NA	NA	NA	NA	NA	NA
587	F80L absent	chr19	28284466	28285389	3.56355	1.30595	301	68	4	28284841	28284863	TTGTATGCTGGGATTGTAGTCC	0.000319	6	3	LINC00662	-79	-	lincRNA	3.37016	3.27352	4.11187	3.94298	0.594791	0.00718329	CTC-459F4.3	-556	+	lincRNA	3.91073	3.852	4.60526	4.45943	0.527641	0.0419781	LLNLF-65H9.1	-531	+	ND	ND	ND	ND	ND	ND	ND	NA	NA	NA	NA
588	F80L absent	chr19	10156085	10156753	2.41515	0.247728	125	25	3	10156532	10156554	GGCCAGGCTGGTCTTGAACTCC	0.000787	5	0	NA	NA	NA	NA	NA	NA	NA	NA	NA	NA	NA	NA	NA	NA	NA	NA	NA	NA	NA	NA	NA	NA	NA	NA	NA	NA	NA	NA	NA	NA	NA	NA	NA	NA
589	F80L absent	chrX	43463042	43463481	2.17119	0.0664954	110	40	5	43463274	43463296	TCCAGCCTGGGTGACAGAGTGA	0.000893	30	0	NA	NA	NA	NA	NA	NA	NA	NA	NA	NA	NA	NA	NA	NA	NA	NA	NA	NA	NA	NA	NA	NA	NA	NA	NA	NA	NA	NA	NA	NA	NA	NA	NA	NA
590	F80L absent	chr15	69136196	69136787	2.77047	0.697253	130	28	1	69136562	69136584	GGCATACTGGGAAGTGTAGTTC	3.98e-10	10	0	NA	NA	NA	NA	NA	NA	NA	NA	NA	NA	NA	NA	NA	NA	NA	NA	NA	NA	NA	NA	NA	NA	NA	NA	NA	NA	NA	NA	NA	NA	NA	NA	NA	NA
591	F80L absent	chr14	93214810	93215301	3.47853	1.94067	284	37	2	93215090	93215112	TGCACACTGGGATTTGTAGTCC	2.07e-09	12	1	LGMN	-8	-	protein_coding	4.51033	4.91695	3.63807	4.07895	-0.898538	8.36805e-08	NA	NA	NA	NA	NA	NA	NA	NA	NA	NA	NA	NA	NA	NA	NA	NA	NA	NA	NA	NA	NA	NA	NA	NA
592	common	chr9	35732382	35732687	4.19622	1.74888	328	61	5	35732533	35732555	GGCACTGTGGGACTTGGAGTTC	1e-08	0	2	TLN1	-142	-	protein_coding	5.58856	5.12805	5.08066	5.25285	-0.311119	0.166281	CREB3	-202	+	protein_coding	3.66334	3.59574	3.78973	3.76553	0.121545	0.717249	NA	NA	NA	NA	NA	NA	NA	NA	NA	NA	NA	NA	NA	NA
593	F80L absent	chr5	14061372	14061832	1.33378	-0.324506	128	39	3	14061740	14061762	TGCCTCCCGGGTTCAAGAGATT	0.000496	38	0	NA	NA	NA	NA	NA	NA	NA	NA	NA	NA	NA	NA	NA	NA	NA	NA	NA	NA	NA	NA	NA	NA	NA	NA	NA	NA	NA	NA	NA	NA	NA	NA	NA	NA
594	common	chr14	90798247	90798559	3.88528	1.54143	250	38	3	90798330	90798352	TGCACTCTGGGAAATGTGGTTT	7.81e-10	3	1	NRDE2	78	-	protein_coding	3.79805	3.8885	3.96532	4.08321	0.140655	0.528148	NA	NA	NA	NA	NA	NA	NA	NA	NA	NA	NA	NA	NA	NA	NA	NA	NA	NA	NA	NA	NA	NA	NA	NA
595	F80L absent	chr10	135462458	135462982	3.42265	1.52947	169	33	5	135462659	135462681	GGATTGTTGGAAGATGCATTCT	8.75e-05	65	0	NA	NA	NA	NA	NA	NA	NA	NA	NA	NA	NA	NA	NA	NA	NA	NA	NA	NA	NA	NA	NA	NA	NA	NA	NA	NA	NA	NA	NA	NA	NA	NA	NA	NA
596	F80L absent	chr4	26264943	26265587	1.67114	-0.0307295	116	40	4	26265272	26265294	TCTAATCCGGGAAGTGGAGGTT	4.95e-05	72	0	NA	NA	NA	NA	NA	NA	NA	NA	NA	NA	NA	NA	NA	NA	NA	NA	NA	NA	NA	NA	NA	NA	NA	NA	NA	NA	NA	NA	NA	NA	NA	NA	NA	NA
597	F80L absent	chr9	19102847	19103244	2.33487	0.652827	117	18	4	19103022	19103044	TGCCCGGTGGGTCTTGCAGTTT	1.3e-06	6	1	HAUS6	72	-	protein_coding	5.26266	5.21296	5.37886	5.10894	-0.0882817	0.598445	NA	NA	NA	NA	NA	NA	NA	NA	NA	NA	NA	NA	NA	NA	NA	NA	NA	NA	NA	NA	NA	NA	NA	NA
598	F80L absent	chr14	99604394	99604874	2.74598	0.244904	61	8	2	99604548	99604570	GGCACAGAGGGAGGAGGAGCCT	0.000349	21	0	NA	NA	NA	NA	NA	NA	NA	NA	NA	NA	NA	NA	NA	NA	NA	NA	NA	NA	NA	NA	NA	NA	NA	NA	NA	NA	NA	NA	NA	NA	NA	NA	NA	NA
599	F80L absent	chr15	43213015	43213510	2.48508	0.664742	62	14	3	43213268	43213290	GGAATTCTGGGCCTCGTAGTTC	1.28e-07	14	1	TTBK2	-255	-	protein_coding	2.36457	2.22342	2.59455	2.45943	0.143947	0.543981	NA	NA	NA	NA	NA	NA	NA	NA	NA	NA	NA	NA	NA	NA	NA	NA	NA	NA	NA	NA	NA	NA	NA	NA
600	F80L absent	chr2	128283946	128284599	2.7321	0.550164	110	25	4	128284440	128284462	TGCTCACTGGGACTTGTAGTAT	2.58e-07	22	1	IWS1	190	-	protein_coding	5.06134	4.97177	4.97269	5.05702	-0.0384019	0.896061	NA	NA	NA	NA	NA	NA	NA	NA	NA	NA	NA	NA	NA	NA	NA	NA	NA	NA	NA	NA	NA	NA	NA	NA
601	F80L absent	chr11	121055824	121057019	1.73044	1.00207	41	16	NA	NA	NA	NA	NA	NA	0	NA	NA	NA	NA	NA	NA	NA	NA	NA	NA	NA	NA	NA	NA	NA	NA	NA	NA	NA	NA	NA	NA	NA	NA	NA	NA	NA	NA	NA	NA	NA	NA	NA	NA
602	F80L absent	chr8	1298671	1300618	1.0614	-0.29257	65	25	NA	NA	NA	NA	NA	NA	0	NA	NA	NA	NA	NA	NA	NA	NA	NA	NA	NA	NA	NA	NA	NA	NA	NA	NA	NA	NA	NA	NA	NA	NA	NA	NA	NA	NA	NA	NA	NA	NA	NA	NA
603	common	chr1	186344392	186344668	4.47194	1.31799	325	54	6	186344455	186344477	TGGAAGCCGGAAAATTGGGTGC	0.000328	10	2	TPR	295	-	protein_coding	6.91013	6.85873	6.83086	6.93263	-0.00203371	0.992665	C1orf27	360	+	protein_coding	4.10852	4.06523	4.11936	4.23343	0.0426929	0.900294	NA	NA	NA	NA	NA	NA	NA	NA	NA	NA	NA	NA	NA	NA
604	F80L absent	chr6	31866169	31866589	3.55073	1.25518	92	13	3	31866372	31866394	AGCTTTCTGGGAATTGTAGTTT	4.95e-11	10	0	NA	NA	NA	NA	NA	NA	NA	NA	NA	NA	NA	NA	NA	NA	NA	NA	NA	NA	NA	NA	NA	NA	NA	NA	NA	NA	NA	NA	NA	NA	NA	NA	NA	NA
605	common	chr16	30786579	30787019	4.30342	1.23796	754	131	1	30786756	30786778	TGCATCCTGGGAAGTGTAGTTC	8.86e-11	14	0	NA	NA	NA	NA	NA	NA	NA	NA	NA	NA	NA	NA	NA	NA	NA	NA	NA	NA	NA	NA	NA	NA	NA	NA	NA	NA	NA	NA	NA	NA	NA	NA	NA	NA
606	common	chr16	4664781	4665189	4.88514	2.10309	826	108	3	4664946	4664968	GGCATGCTGGGATATGTAGTCC	3.34e-11	5	1	UBALD1	43	-	protein_coding	2.02148	1.20789	1.9782	2.21101	0.0727432	0.93583	NA	NA	NA	NA	NA	NA	NA	NA	NA	NA	NA	NA	NA	NA	NA	NA	NA	NA	NA	NA	NA	NA	NA	NA
607	common	chr1	242011065	242011451	4.60422	1.96582	674	105	1	242011207	242011229	GGGCTGCTGGGCGTTGTAGTTC	2.68e-09	43	1	EXO1	11	+	protein_coding	5.78267	5.93876	5.94977	5.93404	0.0977497	0.629229	NA	NA	NA	NA	NA	NA	NA	NA	NA	NA	NA	NA	NA	NA	NA	NA	NA	NA	NA	NA	NA	NA	NA	NA
608	F80L absent	chr5	788077	788573	1.56515	-0.400958	63	20	NA	NA	NA	NA	NA	NA	0	NA	NA	NA	NA	NA	NA	NA	NA	NA	NA	NA	NA	NA	NA	NA	NA	NA	NA	NA	NA	NA	NA	NA	NA	NA	NA	NA	NA	NA	NA	NA	NA	NA	NA
609	common	chr19	56915443	56915911	4.41498	2.26284	778	157	2	56915664	56915686	GGGCCGCTGGGAAATGGAGTCC	1.78e-09	16	0	NA	NA	NA	NA	NA	NA	NA	NA	NA	NA	NA	NA	NA	NA	NA	NA	NA	NA	NA	NA	NA	NA	NA	NA	NA	NA	NA	NA	NA	NA	NA	NA	NA	NA
610	F80L absent	chr9	138196026	138196407	0.905007	-0.547653	67	33	NA	NA	NA	NA	NA	NA	0	NA	NA	NA	NA	NA	NA	NA	NA	NA	NA	NA	NA	NA	NA	NA	NA	NA	NA	NA	NA	NA	NA	NA	NA	NA	NA	NA	NA	NA	NA	NA	NA	NA	NA
611	common	chr6	601451	602462	2.49679	-1.63701	47	24	1	602424	602446	TGCACACGGGGTGTTCTTGGTG	0.00061	242	0	NA	NA	NA	NA	NA	NA	NA	NA	NA	NA	NA	NA	NA	NA	NA	NA	NA	NA	NA	NA	NA	NA	NA	NA	NA	NA	NA	NA	NA	NA	NA	NA	NA	NA
612	common	chr17	27919855	27920183	3.69862	1.24041	377	73	3	27920081	27920103	GGCATCATGGGGTTTGTAGTCC	1.24e-08	10	0	NA	NA	NA	NA	NA	NA	NA	NA	NA	NA	NA	NA	NA	NA	NA	NA	NA	NA	NA	NA	NA	NA	NA	NA	NA	NA	NA	NA	NA	NA	NA	NA	NA	NA
613	F80L absent	chr16	78133068	78133586	2.28146	0.988713	127	19	1	78133218	78133240	TTGGATATGGGAAATGTAGTCC	1.51e-06	19	1	WWOX	-17	+	protein_coding	4.02857	3.95233	3.42761	3.51475	-0.477398	0.056144	NA	NA	NA	NA	NA	NA	NA	NA	NA	NA	NA	NA	NA	NA	NA	NA	NA	NA	NA	NA	NA	NA	NA	NA
614	F80L absent	chr1	183441033	183441440	2.20011	0.767719	79	25	3	183441114	183441136	GGACTGCTGGGAGGAACTGTAG	0.000667	41	2	SMG7-AS1	-355	-	ND	ND	ND	ND	ND	ND	ND	SMG7	115	+	protein_coding	3.09255	3.81762	3.17632	3.5008	-0.0960734	0.877224	NA	NA	NA	NA	NA	NA	NA	NA	NA	NA	NA	NA	NA	NA
615	F80L absent	chr18	52400248	52400491	1.93455	-0.509674	26	7	NA	NA	NA	NA	NA	NA	0	NA	NA	NA	NA	NA	NA	NA	NA	NA	NA	NA	NA	NA	NA	NA	NA	NA	NA	NA	NA	NA	NA	NA	NA	NA	NA	NA	NA	NA	NA	NA	NA	NA	NA
616	common	chr19	51014299	51014828	5.57934	2.2025	1300	194	4	51014518	51014540	GGCCCCACGGGAGTCGTAGTCC	5.22e-08	24	1	JOSD2	47	-	protein_coding	2.94298	1.81558	3.2765	2.08406	0.0836661	0.957651	NA	NA	NA	NA	NA	NA	NA	NA	NA	NA	NA	NA	NA	NA	NA	NA	NA	NA	NA	NA	NA	NA	NA	NA
617	F80L absent	chr17	27181567	27182131	3.12191	0.920289	148	41	2	27181830	27181852	AGCATGACGGTAGTTTTGGACT	0.000149	133	2	FAM222B	401	-	protein_coding	1.29278	2.08746	1.92979	1.74416	0.117932	0.833029	ERAL1	107	+	protein_coding	5.13463	4.95373	4.84398	5.32697	-0.16187	0.571524	NA	NA	NA	NA	NA	NA	NA	NA	NA	NA	NA	NA	NA	NA
618	common	chr7	155946775	155948153	2.68011	-2.27601	81	0	NA	NA	NA	NA	NA	NA	0	NA	NA	NA	NA	NA	NA	NA	NA	NA	NA	NA	NA	NA	NA	NA	NA	NA	NA	NA	NA	NA	NA	NA	NA	NA	NA	NA	NA	NA	NA	NA	NA	NA	NA
619	F80L absent	chr19	13799772	13800106	1.59043	0.620035	76	31	4	13799885	13799907	AACACTTTGGGAGGCTGAGGTG	0.000641	2	0	NA	NA	NA	NA	NA	NA	NA	NA	NA	NA	NA	NA	NA	NA	NA	NA	NA	NA	NA	NA	NA	NA	NA	NA	NA	NA	NA	NA	NA	NA	NA	NA	NA	NA
620	F80L absent	chr19	57791367	57792047	3.12769	0.961996	245	61	3	57791697	57791719	TGCCTTCTGGGTAATGCAGTTT	2.41e-08	32	2	CTC-444N24.6	-5	-	ND	ND	ND	ND	ND	ND	ND	ZNF460	-288	+	protein_coding	4.58556	4.64155	4.66448	4.65134	-0.0183851	0.949138	NA	NA	NA	NA	NA	NA	NA	NA	NA	NA	NA	NA	NA	NA
621	common	chr12	105501226	105501541	5.01281	1.81957	454	68	3	105501407	105501429	GGGCCCCTGGGAAAGCGAGTCC	6.6e-07	1	1	KIAA1033	-281	+	protein_coding	4.45286	4.44228	4.65076	4.53978	0.0587225	0.841936	NA	NA	NA	NA	NA	NA	NA	NA	NA	NA	NA	NA	NA	NA	NA	NA	NA	NA	NA	NA	NA	NA	NA	NA
622	F80L absent	chr8	32785119	32785608	2.57139	0.65966	48	6	NA	NA	NA	NA	NA	NA	0	NA	NA	NA	NA	NA	NA	NA	NA	NA	NA	NA	NA	NA	NA	NA	NA	NA	NA	NA	NA	NA	NA	NA	NA	NA	NA	NA	NA	NA	NA	NA	NA	NA	NA
623	F80L absent	chr9	136933036	136933473	3.93222	1.2687	322	64	3	136933190	136933212	CGCCTGGCGGGAGTCGTAGTCC	9.75e-08	13	1	BRD3	403	-	protein_coding	5.04701	4.65249	4.31976	4.34625	-0.51601	0.00369469	NA	NA	NA	NA	NA	NA	NA	NA	NA	NA	NA	NA	NA	NA	NA	NA	NA	NA	NA	NA	NA	NA	NA	NA
624	F80L absent	chr19	49447758	49448516	1.39131	0.440686	112	38	3	49447849	49447871	AACCTCCTGGGAGATGTAGTTC	4.9e-09	42	0	NA	NA	NA	NA	NA	NA	NA	NA	NA	NA	NA	NA	NA	NA	NA	NA	NA	NA	NA	NA	NA	NA	NA	NA	NA	NA	NA	NA	NA	NA	NA	NA	NA	NA
625	common	chr6	111136537	111136905	4.22518	1.99923	589	127	4	111136692	111136714	AGGCTCCTGGGAAATGAAGTCG	3.36e-08	7	0	NA	NA	NA	NA	NA	NA	NA	NA	NA	NA	NA	NA	NA	NA	NA	NA	NA	NA	NA	NA	NA	NA	NA	NA	NA	NA	NA	NA	NA	NA	NA	NA	NA	NA
626	F80L absent	chr3	140649809	140650083	3.77897	0.374396	35	6	NA	NA	NA	NA	NA	NA	0	NA	NA	NA	NA	NA	NA	NA	NA	NA	NA	NA	NA	NA	NA	NA	NA	NA	NA	NA	NA	NA	NA	NA	NA	NA	NA	NA	NA	NA	NA	NA	NA	NA	NA
627	F80L absent	chr14	34428817	34429109	2.94368	1.69209	35	13	NA	NA	NA	NA	NA	NA	0	NA	NA	NA	NA	NA	NA	NA	NA	NA	NA	NA	NA	NA	NA	NA	NA	NA	NA	NA	NA	NA	NA	NA	NA	NA	NA	NA	NA	NA	NA	NA	NA	NA	NA
628	F80L absent	chr4	41936919	41937427	2.52655	0.617296	151	38	2	41937067	41937089	GGCATGACGGGAAGTGTGGTTT	4.22e-08	40	1	TMEM33	-36	+	protein_coding	5.48736	5.5656	5.72547	5.5738	0.0410927	0.878854	NA	NA	NA	NA	NA	NA	NA	NA	NA	NA	NA	NA	NA	NA	NA	NA	NA	NA	NA	NA	NA	NA	NA	NA
629	F80L absent	chr19	6760697	6761240	1.72411	0	72	16	NA	NA	NA	NA	NA	NA	0	NA	NA	NA	NA	NA	NA	NA	NA	NA	NA	NA	NA	NA	NA	NA	NA	NA	NA	NA	NA	NA	NA	NA	NA	NA	NA	NA	NA	NA	NA	NA	NA	NA	NA
630	F80L absent	chr2	97405765	97406073	2.57301	0.220857	51	11	3	97406004	97406026	GGCTTGCTGGGATACGTAGTTT	6.3e-09	119	1	LMAN2L	-118	-	protein_coding	3.61941	3.57894	3.63575	3.61471	0.00979562	0.97949	NA	NA	NA	NA	NA	NA	NA	NA	NA	NA	NA	NA	NA	NA	NA	NA	NA	NA	NA	NA	NA	NA	NA	NA
631	F80L absent	chr16	68118583	68119248	2.27444	0.276589	132	22	2	68119064	68119086	TACCTCTCGGGAATTGTAGTTT	1.44e-07	22	1	NFATC3	-261	+	protein_coding	4.18507	4.39712	4.12681	4.44361	-0.075383	0.821474	NA	NA	NA	NA	NA	NA	NA	NA	NA	NA	NA	NA	NA	NA	NA	NA	NA	NA	NA	NA	NA	NA	NA	NA
632	common	chrX	48931550	48931846	4.06116	1.71186	297	69	4	48931685	48931707	GGCGTAACGGTTGTTGTAGTCC	1.63e-05	17	1	PRAF2	32	-	protein_coding	2.05658	1.96347	2.57289	3.14893	0.851082	0.0738488	NA	NA	NA	NA	NA	NA	NA	NA	NA	NA	NA	NA	NA	NA	NA	NA	NA	NA	NA	NA	NA	NA	NA	NA
633	common	chr6	108582234	108582639	4.38429	1.84228	749	136	5	108582459	108582481	TGCATTGTGGGCGCTGTAGTCC	4.91e-08	6	1	SNX3	28	-	protein_coding	6.98493	7.00809	7.12536	7.1645	0.118226	0.519178	NA	NA	NA	NA	NA	NA	NA	NA	NA	NA	NA	NA	NA	NA	NA	NA	NA	NA	NA	NA	NA	NA	NA	NA
634	common	chr22	18560443	18560881	6.059	2.75496	755	140	3	18560715	18560737	AGTACTCTAGGAGTTGTAGTTC	6.01e-08	17	1	PEX26	27	+	protein_coding	3.65191	3.24184	2.83996	2.53854	-0.691186	7.28559e-06	NA	NA	NA	NA	NA	NA	NA	NA	NA	NA	NA	NA	NA	NA	NA	NA	NA	NA	NA	NA	NA	NA	NA	NA
635	common	chr19	54396319	54396588	4.18216	1.6802	246	38	2	54396424	54396446	GGTCTTCTGGGAACTGTAGTCC	8.26e-10	12	0	NA	NA	NA	NA	NA	NA	NA	NA	NA	NA	NA	NA	NA	NA	NA	NA	NA	NA	NA	NA	NA	NA	NA	NA	NA	NA	NA	NA	NA	NA	NA	NA	NA	NA
636	common	chr2	153191443	153191719	5.31812	2.34257	387	62	2	153191576	153191598	GGACTGCCGGGACGCGTAGTTT	1.92e-07	14	1	FMNL2	170	+	protein_coding	3.94953	4	4.29793	4.21645	0.251816	0.0850093	NA	NA	NA	NA	NA	NA	NA	NA	NA	NA	NA	NA	NA	NA	NA	NA	NA	NA	NA	NA	NA	NA	NA	NA
637	F80L absent	chr2	235554073	235556980	0.773869	-0.537565	48	13	NA	NA	NA	NA	NA	NA	0	NA	NA	NA	NA	NA	NA	NA	NA	NA	NA	NA	NA	NA	NA	NA	NA	NA	NA	NA	NA	NA	NA	NA	NA	NA	NA	NA	NA	NA	NA	NA	NA	NA	NA
638	F80L absent	chr4	182160155	182162220	1.59998	0.153842	45	9	NA	NA	NA	NA	NA	NA	0	NA	NA	NA	NA	NA	NA	NA	NA	NA	NA	NA	NA	NA	NA	NA	NA	NA	NA	NA	NA	NA	NA	NA	NA	NA	NA	NA	NA	NA	NA	NA	NA	NA	NA
639	F80L absent	chr1	179851652	179852066	1.73138	0	86	27	5	179851792	179851814	GGGCCGGCGGGAAGTGAGGTTC	2.38e-06	9	1	RP11-533E19.7	-129	-	ND	ND	ND	ND	ND	ND	ND	NA	NA	NA	NA	NA	NA	NA	NA	NA	NA	NA	NA	NA	NA	NA	NA	NA	NA	NA	NA	NA	NA	NA	NA
640	common	chr17	164458	166279	0.667851	-0.641506	141	55	3	165397	165419	TGGAGTACAGGGACTAGAGTTC	0.000516	76	0	NA	NA	NA	NA	NA	NA	NA	NA	NA	NA	NA	NA	NA	NA	NA	NA	NA	NA	NA	NA	NA	NA	NA	NA	NA	NA	NA	NA	NA	NA	NA	NA	NA	NA
641	F80L absent	chr16	33569495	33569788	3.90165	1.2307	41	11	NA	NA	NA	NA	NA	NA	0	NA	NA	NA	NA	NA	NA	NA	NA	NA	NA	NA	NA	NA	NA	NA	NA	NA	NA	NA	NA	NA	NA	NA	NA	NA	NA	NA	NA	NA	NA	NA	NA	NA	NA
642	F80L absent	chr6	28048510	28048917	2.70122	0.844591	107	23	4	28048654	28048676	CGTCCACAGGGACTTGTGAGTC	0.00079	17	2	RP1-313I6.12	195	-	ND	ND	ND	ND	ND	ND	ND	ZNF165	40	+	ND	ND	ND	ND	ND	ND	ND	NA	NA	NA	NA	NA	NA	NA	NA	NA	NA	NA	NA	NA	NA
643	common	chr19	49403044	49403397	4.02841	1.63392	299	54	4	49403267	49403289	CGCCTCATGGGAGCTGTAGTTT	1.73e-08	17	1	NUCB1	87	+	protein_coding	5.32409	5.09466	4.72465	4.94064	-0.530792	0.0137511	NA	NA	NA	NA	NA	NA	NA	NA	NA	NA	NA	NA	NA	NA	NA	NA	NA	NA	NA	NA	NA	NA	NA	NA
644	common	chr1	155278341	155278797	4.45161	2.00463	358	86	3	155278600	155278622	GGCACATTGGGAGTTGTAGTCT	6.49e-09	16	1	FDPS	-30	+	protein_coding	7.67129	7.71211	7.57001	7.66718	-0.105136	0.576259	NA	NA	NA	NA	NA	NA	NA	NA	NA	NA	NA	NA	NA	NA	NA	NA	NA	NA	NA	NA	NA	NA	NA	NA
645	F80L absent	chr16	73281395	73281697	3.48942	0.413242	31	5	NA	NA	NA	NA	NA	NA	0	NA	NA	NA	NA	NA	NA	NA	NA	NA	NA	NA	NA	NA	NA	NA	NA	NA	NA	NA	NA	NA	NA	NA	NA	NA	NA	NA	NA	NA	NA	NA	NA	NA	NA
646	common	chr12	133656790	133657685	4.77747	2.57853	895	170	5	133657388	133657410	TGGTTTCTGGGAATTGTAGTTT	1.38e-10	16	0	NA	NA	NA	NA	NA	NA	NA	NA	NA	NA	NA	NA	NA	NA	NA	NA	NA	NA	NA	NA	NA	NA	NA	NA	NA	NA	NA	NA	NA	NA	NA	NA	NA	NA
647	F80L absent	chr1	156721517	156721832	2.00808	0	90	16	NA	NA	NA	NA	NA	NA	0	NA	NA	NA	NA	NA	NA	NA	NA	NA	NA	NA	NA	NA	NA	NA	NA	NA	NA	NA	NA	NA	NA	NA	NA	NA	NA	NA	NA	NA	NA	NA	NA	NA	NA
648	common	chr20	3026466	3026771	4.03157	1.41279	325	61	1	3026630	3026652	GGAACCTTGGGACCTGTAGTCC	1.31e-07	16	1	MRPS26	-27	+	protein_coding	4.96532	4.58195	3.853	3.58015	-1.09047	5.55831e-06	NA	NA	NA	NA	NA	NA	NA	NA	NA	NA	NA	NA	NA	NA	NA	NA	NA	NA	NA	NA	NA	NA	NA	NA
649	common	chr19	58513963	58514410	5.0849	2.0628	1030	173	4	58514202	58514224	GGTCTGCTGGGAGCTGTAGTTC	1.42e-09	6	0	NA	NA	NA	NA	NA	NA	NA	NA	NA	NA	NA	NA	NA	NA	NA	NA	NA	NA	NA	NA	NA	NA	NA	NA	NA	NA	NA	NA	NA	NA	NA	NA	NA	NA
650	F80L absent	chr7	39986267	39987010	1.45921	-0.144564	123	40	5	39986332	39986354	AGCACTTTGGGAGGTCGAGGCG	1.75e-05	0	0	NA	NA	NA	NA	NA	NA	NA	NA	NA	NA	NA	NA	NA	NA	NA	NA	NA	NA	NA	NA	NA	NA	NA	NA	NA	NA	NA	NA	NA	NA	NA	NA	NA	NA
651	F80L absent	chr4	52710608	52711214	3.4126	1.03304	197	35	7	52710935	52710957	CGAATTCTGGGACTTGTAGTCG	2.7e-08	1	0	NA	NA	NA	NA	NA	NA	NA	NA	NA	NA	NA	NA	NA	NA	NA	NA	NA	NA	NA	NA	NA	NA	NA	NA	NA	NA	NA	NA	NA	NA	NA	NA	NA	NA
652	common	chr19	50144647	50145499	4.95587	2.16213	1808	334	6	50145266	50145288	TGCACGCCGGGAGGCGTAGTCC	2.96e-08	20	1	SCAF1	309	+	protein_coding	3.39917	3.07895	2.79077	2.37573	-0.562285	0.152645	NA	NA	NA	NA	NA	NA	NA	NA	NA	NA	NA	NA	NA	NA	NA	NA	NA	NA	NA	NA	NA	NA	NA	NA
653	F80L only	chr6	519522	520676	0.787393	-2.47662	36	4	10	520565	520587	GGCGCTCGGTGGGTGGTGGTTC	0.000293	15	0	NA	NA	NA	NA	NA	NA	NA	NA	NA	NA	NA	NA	NA	NA	NA	NA	NA	NA	NA	NA	NA	NA	NA	NA	NA	NA	NA	NA	NA	NA	NA	NA	NA	NA
654	common	chr9	130497438	130497858	4.77421	2.66168	713	130	3	130497597	130497619	TGCACGCCGGGAGTTGCAGTTC	1.96e-08	2	1	TOR2A	-44	-	protein_coding	2.74846	2.49825	2.96901	2.76341	0.497733	0.136854	NA	NA	NA	NA	NA	NA	NA	NA	NA	NA	NA	NA	NA	NA	NA	NA	NA	NA	NA	NA	NA	NA	NA	NA
655	common	chr1	44870685	44870941	4.4534	1.19189	229	33	2	44870781	44870803	GGGACTCTGGGAAATGAAGTCC	1.81e-09	58	1	RNF220	53	+	protein_coding	6.0237	6.06048	6.17153	6.17552	0.0761434	0.714921	NA	NA	NA	NA	NA	NA	NA	NA	NA	NA	NA	NA	NA	NA	NA	NA	NA	NA	NA	NA	NA	NA	NA	NA
656	common	chr4	144257102	144257408	3.94339	1.83571	398	65	3	144257244	144257266	GGCACCCTGGGATCTGTAGTTC	1.48e-09	21	0	NA	NA	NA	NA	NA	NA	NA	NA	NA	NA	NA	NA	NA	NA	NA	NA	NA	NA	NA	NA	NA	NA	NA	NA	NA	NA	NA	NA	NA	NA	NA	NA	NA	NA
657	common	chr11	47290913	47291226	4.10596	1.65933	292	51	7	47291163	47291185	CGCGCGCGGGGAGTGGGGGGGC	0.000561	11	1	MADD	-357	+	protein_coding	3.7939	3.69711	4	3.99186	0.021397	0.945858	NA	NA	NA	NA	NA	NA	NA	NA	NA	NA	NA	NA	NA	NA	NA	NA	NA	NA	NA	NA	NA	NA	NA	NA
658	common	chr9	130965300	130965596	4.08513	1.96322	319	71	3	130965521	130965543	GGCATCATGGGTGTCGTAGTTT	3.89e-08	8	1	DNM1	210	+	protein_coding	2.05311	2.29866	1.43829	1.72247	-0.803776	0.0122891	NA	NA	NA	NA	NA	NA	NA	NA	NA	NA	NA	NA	NA	NA	NA	NA	NA	NA	NA	NA	NA	NA	NA	NA
659	common	chr1	153630831	153631224	3.5618	0.840542	326	64	3	153631116	153631138	GGGCGCCCGGGAAATGCTGTCT	5.09e-06	23	1	SNAPIN	103	+	protein_coding	5.14527	5.12846	4.37086	4.47314	-0.769633	9.745e-06	NA	NA	NA	NA	NA	NA	NA	NA	NA	NA	NA	NA	NA	NA	NA	NA	NA	NA	NA	NA	NA	NA	NA	NA
660	common	chr1	3773825	3774239	4.35779	1.78059	450	96	5	3774006	3774028	GGCCTTCTGGGTAATGTAGTTT	2.73e-10	21	2	CEP104	-254	-	protein_coding	4.22959	4.58496	4.32912	4.43162	-0.113321	0.7404	DFFB	-187	+	protein_coding	2.88166	3.31904	3.5472	3.62527	0.496124	0.00983012	NA	NA	NA	NA	NA	NA	NA	NA	NA	NA	NA	NA	NA	NA
661	F80L absent	chr1	27929687	27930072	1.07571	0.249937	38	15	NA	NA	NA	NA	NA	NA	0	NA	NA	NA	NA	NA	NA	NA	NA	NA	NA	NA	NA	NA	NA	NA	NA	NA	NA	NA	NA	NA	NA	NA	NA	NA	NA	NA	NA	NA	NA	NA	NA	NA	NA
662	common	chr2	97202107	97202540	4.22601	2.48893	526	93	3	97202323	97202345	GGACCTCTGGGAATTGTAGTGC	1.91e-09	48	1	ARID5A	157	+	protein_coding	1.42223	0.903038	1.12433	0.485427	-0.39182	0.611546	NA	NA	NA	NA	NA	NA	NA	NA	NA	NA	NA	NA	NA	NA	NA	NA	NA	NA	NA	NA	NA	NA	NA	NA
663	F80L absent	chr11	60681050	60681883	2.83326	1.38012	158	42	4	60681310	60681332	GGCATTGTGGGCAATGTAGTTC	6.34e-09	12	2	TMEM109	-120	+	protein_coding	4.9905	4.87774	4.35544	4.2502	-0.798325	1.25015e-06	RP11-881M11.1	58	-	ND	ND	ND	ND	ND	ND	ND	NA	NA	NA	NA	NA	NA	NA	NA	NA	NA	NA	NA	NA	NA
664	common	chr16	30939203	30939739	5.05018	2.19905	1034	180	4	30939397	30939419	GGACTGTTGGGAGATGTAGTTC	2e-09	18	0	NA	NA	NA	NA	NA	NA	NA	NA	NA	NA	NA	NA	NA	NA	NA	NA	NA	NA	NA	NA	NA	NA	NA	NA	NA	NA	NA	NA	NA	NA	NA	NA	NA	NA
665	common	chr8	29120587	29120898	4.54633	2.55534	467	74	1	29120702	29120724	TGTATGGCGGGACTTGTAGTTC	6.17e-08	6	1	KIF13B	-101	-	protein_coding	2.12433	1.98914	2.02503	2	-0.0446636	0.920538	NA	NA	NA	NA	NA	NA	NA	NA	NA	NA	NA	NA	NA	NA	NA	NA	NA	NA	NA	NA	NA	NA	NA	NA
666	F80L absent	chr22	29167805	29168105	0.684304	-0.299456	42	23	NA	NA	NA	NA	NA	NA	0	NA	NA	NA	NA	NA	NA	NA	NA	NA	NA	NA	NA	NA	NA	NA	NA	NA	NA	NA	NA	NA	NA	NA	NA	NA	NA	NA	NA	NA	NA	NA	NA	NA	NA
667	common	chr19	44716273	44716849	4.27738	1.51454	397	65	4	44716645	44716667	GGCCTTCTGGGAAGGGTAGTTC	5.48e-10	11	0	NA	NA	NA	NA	NA	NA	NA	NA	NA	NA	NA	NA	NA	NA	NA	NA	NA	NA	NA	NA	NA	NA	NA	NA	NA	NA	NA	NA	NA	NA	NA	NA	NA	NA
668	F80L absent	chr9	137356383	137358099	0.641375	-0.441933	111	47	5	137357814	137357836	GGGCGGCTGGGTGAGCGGGGCA	0.000779	46	0	NA	NA	NA	NA	NA	NA	NA	NA	NA	NA	NA	NA	NA	NA	NA	NA	NA	NA	NA	NA	NA	NA	NA	NA	NA	NA	NA	NA	NA	NA	NA	NA	NA	NA
669	common	chr19	49017126	49017462	4.25757	1.92533	348	74	5	49017241	49017263	AGGCTTATGGGAGGTGTAGTCC	2.49e-09	9	1	CTC-273B12.10	-377	-	ND	ND	ND	ND	ND	ND	ND	NA	NA	NA	NA	NA	NA	NA	NA	NA	NA	NA	NA	NA	NA	NA	NA	NA	NA	NA	NA	NA	NA	NA	NA
670	F80L absent	chr6	157234894	157235323	1.96746	-0.383146	79	22	9	157235061	157235083	TGGTCGTTGGGGAGTGGAGAGT	0.000134	24	0	NA	NA	NA	NA	NA	NA	NA	NA	NA	NA	NA	NA	NA	NA	NA	NA	NA	NA	NA	NA	NA	NA	NA	NA	NA	NA	NA	NA	NA	NA	NA	NA	NA	NA
671	F80L absent	chr5	40835258	40835566	3.32419	1.19434	118	20	2	40835482	40835504	AGGCGGGCGGGACTCCCAGTTT	0.000148	106	1	RPL37	25	-	protein_coding	11.2026	11.3366	11.2474	11.5422	0.0586202	0.848285	NA	NA	NA	NA	NA	NA	NA	NA	NA	NA	NA	NA	NA	NA	NA	NA	NA	NA	NA	NA	NA	NA	NA	NA
672	common	chr3	47844498	47844843	4.09273	1.76917	721	114	6	47844612	47844634	CCGCTGCTGGGAGTTGTAGTCC	1.62e-08	1	1	DHX30	-271	+	protein_coding	6.24869	6.0177	6.18428	6.02259	-0.166605	0.600849	NA	NA	NA	NA	NA	NA	NA	NA	NA	NA	NA	NA	NA	NA	NA	NA	NA	NA	NA	NA	NA	NA	NA	NA
673	common	chr10	44144228	44144679	5.52422	3.04285	1308	247	4	44144322	44144344	AGACTCCTGGGAGTTGTAGTCC	3.42e-10	32	1	ZNF32	-149	-	protein_coding	4.35473	4.41143	3.56438	3.62293	-0.80267	7.70177e-05	NA	NA	NA	NA	NA	NA	NA	NA	NA	NA	NA	NA	NA	NA	NA	NA	NA	NA	NA	NA	NA	NA	NA	NA
674	F80L absent	chr1	10534806	10535179	3.17102	0.490846	102	24	3	10535010	10535032	AGGCCTCAGAAAGATGGCGTCC	0.000758	58	0	NA	NA	NA	NA	NA	NA	NA	NA	NA	NA	NA	NA	NA	NA	NA	NA	NA	NA	NA	NA	NA	NA	NA	NA	NA	NA	NA	NA	NA	NA	NA	NA	NA	NA
675	F80L absent	chr2	26100291	26100950	2.24335	0.595851	72	20	3	26100432	26100454	TAACAGGTGGGACTTGTAGAAT	0.000192	32	0	NA	NA	NA	NA	NA	NA	NA	NA	NA	NA	NA	NA	NA	NA	NA	NA	NA	NA	NA	NA	NA	NA	NA	NA	NA	NA	NA	NA	NA	NA	NA	NA	NA	NA
676	common	chr11	65625523	65626004	4.85806	3.19893	773	168	3	65625728	65625750	GAGCCGACGGGAAATGGAGTCC	1.65e-06	3	0	NA	NA	NA	NA	NA	NA	NA	NA	NA	NA	NA	NA	NA	NA	NA	NA	NA	NA	NA	NA	NA	NA	NA	NA	NA	NA	NA	NA	NA	NA	NA	NA	NA	NA
677	common	chr3	196466501	196466759	5.20857	2.31687	389	100	3	196466628	196466650	CTGCCCATGGGAGGTGGCGCTC	0.000487	31	1	PAK2	98	+	protein_coding	3.90593	4.33485	4.38405	4.52669	0.14462	0.6462	NA	NA	NA	NA	NA	NA	NA	NA	NA	NA	NA	NA	NA	NA	NA	NA	NA	NA	NA	NA	NA	NA	NA	NA
678	F80L absent	chr3	123197299	123198103	2.73779	-0.115246	79	16	NA	NA	NA	NA	NA	NA	0	NA	NA	NA	NA	NA	NA	NA	NA	NA	NA	NA	NA	NA	NA	NA	NA	NA	NA	NA	NA	NA	NA	NA	NA	NA	NA	NA	NA	NA	NA	NA	NA	NA	NA
679	common	chr3	52188567	52188883	4.13622	2.01574	246	42	3	52188734	52188756	AGCCTCCTGGGAAATGCAGTTC	3.18e-09	0	1	POC1A	-19	-	protein_coding	3.54226	3.4489	3.08236	3.25248	-0.342947	0.229502	NA	NA	NA	NA	NA	NA	NA	NA	NA	NA	NA	NA	NA	NA	NA	NA	NA	NA	NA	NA	NA	NA	NA	NA
680	common	chr19	633426	633727	4.5798	1.76177	404	92	2	633567	633589	CGCCTGCCGGGAGTTGTGGTTT	1.88e-08	11	1	POLRMT	21	-	protein_coding	5.38578	4.95838	5.58376	5.06091	-0.149888	0.899025	NA	NA	NA	NA	NA	NA	NA	NA	NA	NA	NA	NA	NA	NA	NA	NA	NA	NA	NA	NA	NA	NA	NA	NA
681	F80L absent	chr21	10163682	10164208	2.23267	0.34417	137	23	2	10163753	10163775	AGCCTCATGGGAATTGTAGTGT	4.18e-09	26	0	NA	NA	NA	NA	NA	NA	NA	NA	NA	NA	NA	NA	NA	NA	NA	NA	NA	NA	NA	NA	NA	NA	NA	NA	NA	NA	NA	NA	NA	NA	NA	NA	NA	NA
682	F80L absent	chr15	92292302	92293059	2.22463	-0.209521	126	50	2	92292655	92292677	GGAGGTGTTGGAGATGGAGGTG	0.000344	76	0	NA	NA	NA	NA	NA	NA	NA	NA	NA	NA	NA	NA	NA	NA	NA	NA	NA	NA	NA	NA	NA	NA	NA	NA	NA	NA	NA	NA	NA	NA	NA	NA	NA	NA
683	common	chr22	22020057	22020408	5.02931	2.52408	438	80	4	22020242	22020264	GGCGTGCTGGGAATTGTGGTTC	1.35e-09	2	0	NA	NA	NA	NA	NA	NA	NA	NA	NA	NA	NA	NA	NA	NA	NA	NA	NA	NA	NA	NA	NA	NA	NA	NA	NA	NA	NA	NA	NA	NA	NA	NA	NA	NA
684	F80L absent	chr17	38527526	38527899	2.09284	0.0595256	89	21	1	38527740	38527762	GGGATGCTGGGAAATGTAGTCT	2.3e-11	134	0	NA	NA	NA	NA	NA	NA	NA	NA	NA	NA	NA	NA	NA	NA	NA	NA	NA	NA	NA	NA	NA	NA	NA	NA	NA	NA	NA	NA	NA	NA	NA	NA	NA	NA
685	common	chr16	46917925	46918289	4.88345	2.75716	842	163	3	46918136	46918158	GGCGCTGTGGGACTTGTAGTTC	1.27e-08	3	1	GPT2	183	+	protein_coding	3.52982	3.24184	2.82375	2.41143	-0.701331	0.000218215	NA	NA	NA	NA	NA	NA	NA	NA	NA	NA	NA	NA	NA	NA	NA	NA	NA	NA	NA	NA	NA	NA	NA	NA
686	F80L absent	chr21	35014607	35014845	0.988877	-0.819194	48	12	NA	NA	NA	NA	NA	NA	1	ITSN1	-20	+	protein_coding	4.62585	4.71315	4.81916	4.8748	0.172593	0.257503	NA	NA	NA	NA	NA	NA	NA	NA	NA	NA	NA	NA	NA	NA	NA	NA	NA	NA	NA	NA	NA	NA	NA	NA
687	common	chr19	48906987	48907493	3.23446	1.04718	325	86	5	48907077	48907099	TGGCTGCTGGGGGCTGTAGTTC	7.76e-09	32	0	NA	NA	NA	NA	NA	NA	NA	NA	NA	NA	NA	NA	NA	NA	NA	NA	NA	NA	NA	NA	NA	NA	NA	NA	NA	NA	NA	NA	NA	NA	NA	NA	NA	NA
688	common	chr19	48922478	48922902	5.4554	2.68072	621	132	4	48922671	48922693	GGGCTGCTGGGAAATGTAGTTC	1.77e-11	11	0	NA	NA	NA	NA	NA	NA	NA	NA	NA	NA	NA	NA	NA	NA	NA	NA	NA	NA	NA	NA	NA	NA	NA	NA	NA	NA	NA	NA	NA	NA	NA	NA	NA	NA
689	common	chr19	58666326	58666627	2.72716	0.685417	209	34	5	58666522	58666544	GGTTTTCTGGGAGATGTAGGCG	1.62e-07	16	1	ZNF329	1	-	protein_coding	1.48543	1.52105	2.7866	2.62761	1.18018	2.65907e-09	NA	NA	NA	NA	NA	NA	NA	NA	NA	NA	NA	NA	NA	NA	NA	NA	NA	NA	NA	NA	NA	NA	NA	NA
690	F80L absent	chr18	77264757	77265739	1.22074	-0.457034	83	17	NA	NA	NA	NA	NA	NA	0	NA	NA	NA	NA	NA	NA	NA	NA	NA	NA	NA	NA	NA	NA	NA	NA	NA	NA	NA	NA	NA	NA	NA	NA	NA	NA	NA	NA	NA	NA	NA	NA	NA	NA
691	F80L absent	chr8	81617450	81617879	2.47589	-0.202105	53	9	2	81617656	81617678	GTGTTCATGTGGGTTGATGTCC	0.000859	124	0	NA	NA	NA	NA	NA	NA	NA	NA	NA	NA	NA	NA	NA	NA	NA	NA	NA	NA	NA	NA	NA	NA	NA	NA	NA	NA	NA	NA	NA	NA	NA	NA	NA	NA
692	F80L absent	chr6	33756868	33757147	2.51658	-0.171953	59	13	NA	NA	NA	NA	NA	NA	1	LEMD2	-94	-	protein_coding	4.28021	4.18269	4.49121	4.42828	0.0537698	0.914285	NA	NA	NA	NA	NA	NA	NA	NA	NA	NA	NA	NA	NA	NA	NA	NA	NA	NA	NA	NA	NA	NA	NA	NA
693	F80L absent	chr4	190970640	190971239	2.49185	0.125531	84	18	6	190970959	190970981	GTCTTGCTGGGAGATGCAGTCT	2.43e-07	56	0	NA	NA	NA	NA	NA	NA	NA	NA	NA	NA	NA	NA	NA	NA	NA	NA	NA	NA	NA	NA	NA	NA	NA	NA	NA	NA	NA	NA	NA	NA	NA	NA	NA	NA
694	F80L absent	chr8	112248556	112248867	3.35564	1.82337	80	15	5	112248728	112248750	CTACTGGTGGAGAGGGGAGTCC	0.000734	2	1	RP11-946L20.4	-279	-	ND	ND	ND	ND	ND	ND	ND	NA	NA	NA	NA	NA	NA	NA	NA	NA	NA	NA	NA	NA	NA	NA	NA	NA	NA	NA	NA	NA	NA	NA	NA
695	common	chr8	67525573	67525947	5.83504	2.46662	667	122	4	67525774	67525796	GGCCTGCTGGGAGAGCGAGTTC	8.55e-08	11	0	NA	NA	NA	NA	NA	NA	NA	NA	NA	NA	NA	NA	NA	NA	NA	NA	NA	NA	NA	NA	NA	NA	NA	NA	NA	NA	NA	NA	NA	NA	NA	NA	NA	NA
696	common	chr11	809325	809901	4.91372	2.24676	771	164	3	809559	809581	TGCACCATGGGACTTGCAGTTC	1.17e-07	6	2	PIDD	140	-	protein_coding	2.18587	1.54102	2.13422	1.34483	-0.188941	0.812032	RPLP2	34	+	protein_coding	9.86237	9.74059	9.55071	9.74997	-0.265202	0.230754	NA	NA	NA	NA	NA	NA	NA	NA	NA	NA	NA	NA	NA	NA
697	common	chr19	56904477	56905081	5.19381	3.06722	801	162	1	56904658	56904680	GGGCCGGCGGGAAATGTAGTCT	1.62e-08	24	2	ZNF582	135	-	protein_coding	1.94111	2.17951	1.76129	1.79494	-0.332845	0.49596	ZNF582-AS1	246	+	lincRNA	1.10434	1.27501	1.51602	1.34483	0.253664	0.78063	NA	NA	NA	NA	NA	NA	NA	NA	NA	NA	NA	NA	NA	NA
698	F80L absent	chr12	56435359	56435867	4.20881	1.31639	163	30	3	56435526	56435548	TGCTTGGTGGGAATTGTAGTGC	8.43e-09	16	2	RP11-603J24.4	-23	-	ND	ND	ND	ND	ND	ND	ND	RPS26	24	+	protein_coding	8.70238	8.65127	8.45171	8.79305	-0.0549151	0.881218	NA	NA	NA	NA	NA	NA	NA	NA	NA	NA	NA	NA	NA	NA
699	F80L absent	chr9	95833905	95834746	1.90022	0.398644	79	33	NA	NA	NA	NA	NA	NA	0	NA	NA	NA	NA	NA	NA	NA	NA	NA	NA	NA	NA	NA	NA	NA	NA	NA	NA	NA	NA	NA	NA	NA	NA	NA	NA	NA	NA	NA	NA	NA	NA	NA	NA
700	F80L absent	chr17	46969645	46969922	2.6116	0.308453	112	18	3	46969758	46969780	TGCATGTTGGGATTGGTAGTTG	7.39e-08	22	1	ATP5G1	344	+	protein_coding	7.35412	7.33896	7.42148	7.42895	-0.0127345	0.964141	NA	NA	NA	NA	NA	NA	NA	NA	NA	NA	NA	NA	NA	NA	NA	NA	NA	NA	NA	NA	NA	NA	NA	NA
701	F80L absent	chr12	119667565	119667914	3.7625	1.29546	44	10	NA	NA	NA	NA	NA	NA	0	NA	NA	NA	NA	NA	NA	NA	NA	NA	NA	NA	NA	NA	NA	NA	NA	NA	NA	NA	NA	NA	NA	NA	NA	NA	NA	NA	NA	NA	NA	NA	NA	NA	NA
702	F80L absent	chr4	100484755	100485354	3.39759	1.6845	131	39	4	100485079	100485101	AGTTGACAGGGAAGTGAAATCT	0.00075	3	2	MTTP	-136	+	ND	ND	ND	ND	ND	ND	ND	TRMT10A	135	-	protein_coding	3.67807	3.71699	5.03386	5.16108	1.54085	1.79969e-39	NA	NA	NA	NA	NA	NA	NA	NA	NA	NA	NA	NA	NA	NA
703	F80L absent	chr4	7075209	7075996	2.63535	0.435215	97	19	2	7075515	7075537	AGGATGCTGGGAAATGTAGTTT	4.43e-11	8	0	NA	NA	NA	NA	NA	NA	NA	NA	NA	NA	NA	NA	NA	NA	NA	NA	NA	NA	NA	NA	NA	NA	NA	NA	NA	NA	NA	NA	NA	NA	NA	NA	NA	NA
704	common	chr16	87984295	87984909	5.04903	2.92346	992	215	4	87984573	87984595	GGGTTGCTGGGACTTGTAGTTA	1.03e-08	19	0	NA	NA	NA	NA	NA	NA	NA	NA	NA	NA	NA	NA	NA	NA	NA	NA	NA	NA	NA	NA	NA	NA	NA	NA	NA	NA	NA	NA	NA	NA	NA	NA	NA	NA
705	common	chr2	26205480	26205826	4.04675	2.22702	434	83	3	26205640	26205662	AGCATGCCGGGAATTGTAGTCC	8.2e-11	10	1	KIF3C	-35	-	protein_coding	2.0635	1.89918	1.29866	1.29866	-0.829855	0.00602934	NA	NA	NA	NA	NA	NA	NA	NA	NA	NA	NA	NA	NA	NA	NA	NA	NA	NA	NA	NA	NA	NA	NA	NA
706	F80L absent	chr12	72057194	72057883	1.76962	0.115941	78	19	NA	NA	NA	NA	NA	NA	0	NA	NA	NA	NA	NA	NA	NA	NA	NA	NA	NA	NA	NA	NA	NA	NA	NA	NA	NA	NA	NA	NA	NA	NA	NA	NA	NA	NA	NA	NA	NA	NA	NA	NA
707	common	chr2	37193600	37193895	3.51853	0.866001	306	48	3	37193801	37193823	GGCTTGCCGGGAAATGTAGTCG	8.43e-09	30	1	STRN	-132	-	protein_coding	3.72028	3.81865	4.26903	4.32625	0.353585	0.00772755	NA	NA	NA	NA	NA	NA	NA	NA	NA	NA	NA	NA	NA	NA	NA	NA	NA	NA	NA	NA	NA	NA	NA	NA
708	common	chr9	127533531	127533865	4.88869	2.11288	481	89	2	127533642	127533664	GGCACGCTGGAAGTTGGAGTCC	2.08e-08	20	1	NR6A1	-109	-	protein_coding	1.83996	2.05311	2.18903	2.37573	0.0992622	0.768046	NA	NA	NA	NA	NA	NA	NA	NA	NA	NA	NA	NA	NA	NA	NA	NA	NA	NA	NA	NA	NA	NA	NA	NA
709	F80L absent	chr22	50338554	50339049	2.82555	0.341849	94	14	7	50338772	50338794	AGTTTCCTGGGGGACCTGGTGA	0.00041	6	0	NA	NA	NA	NA	NA	NA	NA	NA	NA	NA	NA	NA	NA	NA	NA	NA	NA	NA	NA	NA	NA	NA	NA	NA	NA	NA	NA	NA	NA	NA	NA	NA	NA	NA
710	F80L absent	chr6	161795558	161795585	1.49139	0.167165	23	18	2	161795507	161795529	GGGTGTGTGGTGTGTGTGGTGT	0.000644	60	0	NA	NA	NA	NA	NA	NA	NA	NA	NA	NA	NA	NA	NA	NA	NA	NA	NA	NA	NA	NA	NA	NA	NA	NA	NA	NA	NA	NA	NA	NA	NA	NA	NA	NA
711	common	chr19	4304350	4304678	5.13798	2.36454	852	163	3	4304555	4304577	GGCCGCCTGGGAAATGTAGTTC	6.29e-10	3	1	FSD1	83	+	protein_coding	4.07639	3.93074	3.17792	2.74631	-1.19431	1.74289e-08	NA	NA	NA	NA	NA	NA	NA	NA	NA	NA	NA	NA	NA	NA	NA	NA	NA	NA	NA	NA	NA	NA	NA	NA
712	F80L absent	chr19	51262874	51263344	2.45015	0.296239	103	33	5	51263177	51263199	GGGAGGCCAGGCGCTGTGGCTC	0.000438	11	0	NA	NA	NA	NA	NA	NA	NA	NA	NA	NA	NA	NA	NA	NA	NA	NA	NA	NA	NA	NA	NA	NA	NA	NA	NA	NA	NA	NA	NA	NA	NA	NA	NA	NA
713	common	chr12	13197093	13197490	3.84907	2.48701	356	80	2	13197282	13197304	GTTCTGCCGGGAAGTGTAGTTC	2e-07	4	1	KIAA1467	-73	+	protein_coding	3.37156	3.44758	3.21568	3.24489	-0.238665	0.1927	NA	NA	NA	NA	NA	NA	NA	NA	NA	NA	NA	NA	NA	NA	NA	NA	NA	NA	NA	NA	NA	NA	NA	NA
714	common	chr19	42746696	42747566	5.56311	3.03796	1916	416	5	42746839	42746861	GGCACGCCGGGAAATGAAGTCC	7.94e-09	30	2	GSK3A	-354	-	protein_coding	4.61235	4.4822	4.83643	5.04483	0.437031	0.0029378	AC006486.1	-204	+	protein_coding	-0.810966	-0.0439433	1.79077	1.85997	2.18634	7.91317e-07	NA	NA	NA	NA	NA	NA	NA	NA	NA	NA	NA	NA	NA	NA
715	F80L absent	chr12	124593910	124594474	1.47767	0	63	20	NA	NA	NA	NA	NA	NA	0	NA	NA	NA	NA	NA	NA	NA	NA	NA	NA	NA	NA	NA	NA	NA	NA	NA	NA	NA	NA	NA	NA	NA	NA	NA	NA	NA	NA	NA	NA	NA	NA	NA	NA
716	common	chr12	132185546	132186536	1.46358	-0.705042	45	25	13	132186256	132186278	GTGGTGGTGGGGGCTGTGGGCG	0.000306	7	0	NA	NA	NA	NA	NA	NA	NA	NA	NA	NA	NA	NA	NA	NA	NA	NA	NA	NA	NA	NA	NA	NA	NA	NA	NA	NA	NA	NA	NA	NA	NA	NA	NA	NA
717	F80L absent	chr1	202636388	202636744	4.01747	2.25831	200	47	5	202636526	202636548	GGGAGCTTGGGAAATGTAGTTT	2.03e-08	20	0	NA	NA	NA	NA	NA	NA	NA	NA	NA	NA	NA	NA	NA	NA	NA	NA	NA	NA	NA	NA	NA	NA	NA	NA	NA	NA	NA	NA	NA	NA	NA	NA	NA	NA
718	F80L absent	chr1	203509391	203509826	1.43456	0.0604739	75	20	3	203509755	203509777	TTGAACCCAGGAGGTGGAGGCT	0.000464	75	0	NA	NA	NA	NA	NA	NA	NA	NA	NA	NA	NA	NA	NA	NA	NA	NA	NA	NA	NA	NA	NA	NA	NA	NA	NA	NA	NA	NA	NA	NA	NA	NA	NA	NA
719	F80L only	chr1	161432517	161432871	2.78983	0	21	0	3	161432601	161432623	AGCTCTCTGGGCGCCGTGGGGG	0.000269	24	0	NA	NA	NA	NA	NA	NA	NA	NA	NA	NA	NA	NA	NA	NA	NA	NA	NA	NA	NA	NA	NA	NA	NA	NA	NA	NA	NA	NA	NA	NA	NA	NA	NA	NA
720	common	chr5	32444717	32445139	5.18255	2.45305	1711	342	3	32444887	32444909	GGCATCCTGGGAGCTGTAGTCC	1e-10	10	1	ZFR	-61	-	protein_coding	6.70113	6.70002	6.87701	6.90159	0.0885694	0.543591	NA	NA	NA	NA	NA	NA	NA	NA	NA	NA	NA	NA	NA	NA	NA	NA	NA	NA	NA	NA	NA	NA	NA	NA
721	common	chr1	120190836	120191215	3.46919	1.52905	293	62	4	120190948	120190970	AGCATGCCTCGATTTGTAGTTC	2.89e-05	6	0	NA	NA	NA	NA	NA	NA	NA	NA	NA	NA	NA	NA	NA	NA	NA	NA	NA	NA	NA	NA	NA	NA	NA	NA	NA	NA	NA	NA	NA	NA	NA	NA	NA	NA
722	F80L absent	chr1	161434148	161434670	3.01125	0.134552	45	6	1	161434184	161434206	AGGATGCTGGATGGCGTGCCTC	0.00035	20	0	NA	NA	NA	NA	NA	NA	NA	NA	NA	NA	NA	NA	NA	NA	NA	NA	NA	NA	NA	NA	NA	NA	NA	NA	NA	NA	NA	NA	NA	NA	NA	NA	NA	NA
723	common	chr19	17721033	17721437	3.36477	1.22043	254	45	4	17721337	17721359	GCAATGCTGGGAAATGTAGTCT	6e-09	37	0	NA	NA	NA	NA	NA	NA	NA	NA	NA	NA	NA	NA	NA	NA	NA	NA	NA	NA	NA	NA	NA	NA	NA	NA	NA	NA	NA	NA	NA	NA	NA	NA	NA	NA
724	common	chr2	27593136	27593715	4.88689	2.87623	1083	213	4	27593311	27593333	GGCCCGTCGGAAATTGTAGTCC	1.34e-07	3	2	EIF2B4	-72	-	protein_coding	4.61235	4.41886	4.51602	4.50016	-0.0816118	0.801327	SNX17	-36	+	protein_coding	5.53605	5.37712	5.20516	5.04789	-0.445398	0.0246067	NA	NA	NA	NA	NA	NA	NA	NA	NA	NA	NA	NA	NA	NA
725	F80L absent	chrX	133389359	133389968	2.29076	0.5115	58	14	NA	NA	NA	NA	NA	NA	0	NA	NA	NA	NA	NA	NA	NA	NA	NA	NA	NA	NA	NA	NA	NA	NA	NA	NA	NA	NA	NA	NA	NA	NA	NA	NA	NA	NA	NA	NA	NA	NA	NA	NA
726	F80L absent	chr4	141208514	141208879	2.10544	1.24252	25	5	NA	NA	NA	NA	NA	NA	0	NA	NA	NA	NA	NA	NA	NA	NA	NA	NA	NA	NA	NA	NA	NA	NA	NA	NA	NA	NA	NA	NA	NA	NA	NA	NA	NA	NA	NA	NA	NA	NA	NA	NA
727	F80L only	chr13	109660312	109660765	2.02453	2.02453	18	18	1	109660391	109660413	TGTAATATTGGAATCATACTTT	0.000458	92	0	NA	NA	NA	NA	NA	NA	NA	NA	NA	NA	NA	NA	NA	NA	NA	NA	NA	NA	NA	NA	NA	NA	NA	NA	NA	NA	NA	NA	NA	NA	NA	NA	NA	NA
728	common	chr10	102673019	102673275	3.64613	2.07427	280	63	3	102673162	102673184	GGGCTACTGGGAGTTGGAGTTT	4.67e-09	18	0	NA	NA	NA	NA	NA	NA	NA	NA	NA	NA	NA	NA	NA	NA	NA	NA	NA	NA	NA	NA	NA	NA	NA	NA	NA	NA	NA	NA	NA	NA	NA	NA	NA	NA
729	common	chr6	88182312	88182751	3.30529	1.08573	306	58	5	88182705	88182727	GGGCTGTCGGGGAACCATGGCT	0.000871	90	0	NA	NA	NA	NA	NA	NA	NA	NA	NA	NA	NA	NA	NA	NA	NA	NA	NA	NA	NA	NA	NA	NA	NA	NA	NA	NA	NA	NA	NA	NA	NA	NA	NA	NA
730	common	chr5	178157633	178157957	4.64928	2.73586	530	105	3	178157730	178157752	AGGCCGCTGGGAAATGGAGTCC	3.39e-09	3	1	ZNF354A	-92	-	protein_coding	3.01436	3.08066	2.68706	2.67807	-0.378576	0.140633	NA	NA	NA	NA	NA	NA	NA	NA	NA	NA	NA	NA	NA	NA	NA	NA	NA	NA	NA	NA	NA	NA	NA	NA
731	common	chr9	116037605	116038033	3.78449	1.7204	482	112	7	116037845	116037867	AGCATGATGGAAGTCGTAGTAG	3.78e-06	17	2	PRPF4	-196	+	protein_coding	5.77056	5.9479	5.93852	5.94556	0.0524255	0.840528	CDC26	50	-	protein_coding	5.5157	5.60733	6.22284	6.33575	0.695407	5.46474e-06	NA	NA	NA	NA	NA	NA	NA	NA	NA	NA	NA	NA	NA	NA
732	F80L absent	chr15	31563118	31563423	2.70788	0.359843	30	6	NA	NA	NA	NA	NA	NA	0	NA	NA	NA	NA	NA	NA	NA	NA	NA	NA	NA	NA	NA	NA	NA	NA	NA	NA	NA	NA	NA	NA	NA	NA	NA	NA	NA	NA	NA	NA	NA	NA	NA	NA
733	F80L absent	chr13	114996568	114996958	2.00488	-0.263577	76	36	8	114996746	114996768	TGGATCGTGGGGGTGGAGTGCC	0.000417	26	0	NA	NA	NA	NA	NA	NA	NA	NA	NA	NA	NA	NA	NA	NA	NA	NA	NA	NA	NA	NA	NA	NA	NA	NA	NA	NA	NA	NA	NA	NA	NA	NA	NA	NA
734	F80L absent	chr15	98784316	98784555	3.34577	1.09516	22	7	NA	NA	NA	NA	NA	NA	0	NA	NA	NA	NA	NA	NA	NA	NA	NA	NA	NA	NA	NA	NA	NA	NA	NA	NA	NA	NA	NA	NA	NA	NA	NA	NA	NA	NA	NA	NA	NA	NA	NA	NA
735	F80L absent	chr9	136376548	136377185	1.68284	-0.252421	104	25	2	136377141	136377163	TGGTGTGTGGTGTATGGAGTGT	0.000379	126	0	NA	NA	NA	NA	NA	NA	NA	NA	NA	NA	NA	NA	NA	NA	NA	NA	NA	NA	NA	NA	NA	NA	NA	NA	NA	NA	NA	NA	NA	NA	NA	NA	NA	NA
736	common	chr1	47799735	47800286	4.49472	1.85439	660	141	5	47799888	47799910	TGGCCGCCGGGACTCGTAGTCT	8.22e-08	24	0	NA	NA	NA	NA	NA	NA	NA	NA	NA	NA	NA	NA	NA	NA	NA	NA	NA	NA	NA	NA	NA	NA	NA	NA	NA	NA	NA	NA	NA	NA	NA	NA	NA	NA
737	F80L absent	chr8	127522719	127523117	2.77937	1.19381	44	12	NA	NA	NA	NA	NA	NA	0	NA	NA	NA	NA	NA	NA	NA	NA	NA	NA	NA	NA	NA	NA	NA	NA	NA	NA	NA	NA	NA	NA	NA	NA	NA	NA	NA	NA	NA	NA	NA	NA	NA	NA
738	common	chr1	236445206	236445638	4.5811	1.80517	961	210	5	236445347	236445369	GGCCTTGTGGGAGTTGTGGTCC	1.36e-09	6	1	ERO1LB	-103	-	protein_coding	3.01614	3.05311	3.7666	3.62527	0.552153	0.000716821	NA	NA	NA	NA	NA	NA	NA	NA	NA	NA	NA	NA	NA	NA	NA	NA	NA	NA	NA	NA	NA	NA	NA	NA
739	common	chr12	64797979	64798218	4.65595	2.43376	285	70	4	64798119	64798141	TGCATGCTGGGAGTTGTAGGCC	2.51e-10	8	1	XPOT	32	+	protein_coding	6.55628	6.55842	6.97888	6.83731	0.331627	0.000690585	NA	NA	NA	NA	NA	NA	NA	NA	NA	NA	NA	NA	NA	NA	NA	NA	NA	NA	NA	NA	NA	NA	NA	NA
740	common	chr19	38397496	38398060	4.59388	2.5964	976	216	4	38397842	38397864	GTCCTCCTGGGAACTGTAGTTT	7.81e-09	32	2	WDR87	-461	-	ND	ND	ND	ND	ND	ND	ND	SIPA1L3	90	+	protein_coding	2.17632	2.54597	3.31615	3.63691	0.268353	0.382215	NA	NA	NA	NA	NA	NA	NA	NA	NA	NA	NA	NA	NA	NA
741	F80L absent	chr9	139878421	139878676	2.37561	-0.296064	73	15	NA	NA	NA	NA	NA	NA	0	NA	NA	NA	NA	NA	NA	NA	NA	NA	NA	NA	NA	NA	NA	NA	NA	NA	NA	NA	NA	NA	NA	NA	NA	NA	NA	NA	NA	NA	NA	NA	NA	NA	NA
742	F80L absent	chr7	2097796	2098707	0.255559	-0.554769	34	25	NA	NA	NA	NA	NA	NA	0	NA	NA	NA	NA	NA	NA	NA	NA	NA	NA	NA	NA	NA	NA	NA	NA	NA	NA	NA	NA	NA	NA	NA	NA	NA	NA	NA	NA	NA	NA	NA	NA	NA	NA
743	common	chr2	27070537	27070993	5.01636	2.61947	823	171	2	27070789	27070811	GGCCTGCCGGGAGTTGTAGTCC	7.5e-11	0	1	DPYSL5	-150	+	protein_coding	4.06005	3.87578	3.51854	3.5435	-0.463411	0.00369469	NA	NA	NA	NA	NA	NA	NA	NA	NA	NA	NA	NA	NA	NA	NA	NA	NA	NA	NA	NA	NA	NA	NA	NA
744	common	chr16	4321724	4322026	4.40597	1.61787	358	83	7	4321913	4321935	GGCCTCGCGGGAGCTGTAGTTC	1.18e-08	13	0	NA	NA	NA	NA	NA	NA	NA	NA	NA	NA	NA	NA	NA	NA	NA	NA	NA	NA	NA	NA	NA	NA	NA	NA	NA	NA	NA	NA	NA	NA	NA	NA	NA	NA
745	common	chr5	175788642	175788980	4.33116	1.38871	246	50	4	175788848	175788870	GGCATGCTGGGAGTTGTTGTCC	3.09e-10	10	1	KIAA1191	160	-	protein_coding	6.1637	6.0343	6.29627	6.45236	0.281371	0.0269734	NA	NA	NA	NA	NA	NA	NA	NA	NA	NA	NA	NA	NA	NA	NA	NA	NA	NA	NA	NA	NA	NA	NA	NA
746	F80L absent	chr19	49341740	49342334	3.01013	1.17863	187	46	5	49342103	49342125	GCCTTTCTGGGAGTTGTAGTTC	1.86e-09	29	0	NA	NA	NA	NA	NA	NA	NA	NA	NA	NA	NA	NA	NA	NA	NA	NA	NA	NA	NA	NA	NA	NA	NA	NA	NA	NA	NA	NA	NA	NA	NA	NA	NA	NA
747	common	chr19	36980406	36980959	3.57945	2.70107	240	63	2	36980805	36980827	AGCCTTCTGGGAGATGTAGTTC	9.98e-12	85	2	CTD-2630F21.1	-131	+	ND	ND	ND	ND	ND	ND	ND	ZNF566	122	-	protein_coding	2.92029	2.87578	2.38957	2.05658	-0.804462	0.000875649	NA	NA	NA	NA	NA	NA	NA	NA	NA	NA	NA	NA	NA	NA
748	common	chr3	122233655	122234089	4.38039	2.2691	357	60	2	122233844	122233866	AGGCTGCCGGGAGACGTAGTCT	1.46e-08	44	1	KPNA1	-80	-	protein_coding	5.38059	5.30305	5.62732	5.66306	0.305778	0.0107365	NA	NA	NA	NA	NA	NA	NA	NA	NA	NA	NA	NA	NA	NA	NA	NA	NA	NA	NA	NA	NA	NA	NA	NA
749	common	chr15	23102449	23103128	1.24699	2.72514	147	58	NA	NA	NA	NA	NA	NA	0	NA	NA	NA	NA	NA	NA	NA	NA	NA	NA	NA	NA	NA	NA	NA	NA	NA	NA	NA	NA	NA	NA	NA	NA	NA	NA	NA	NA	NA	NA	NA	NA	NA	NA
750	F80L absent	chr17	17936444	17937047	2.44018	0.90577	119	39	1	17936916	17936938	TGCACTGTGGGAGTTGTGGTTC	4.6e-09	195	0	NA	NA	NA	NA	NA	NA	NA	NA	NA	NA	NA	NA	NA	NA	NA	NA	NA	NA	NA	NA	NA	NA	NA	NA	NA	NA	NA	NA	NA	NA	NA	NA	NA	NA
751	common	chr7	149411744	149411983	3.82295	1.35221	258	65	3	149411856	149411878	CGCCTTCTGGGAAGTGTAGTCC	4.86e-10	6	1	KRBA1	9	+	protein_coding	2.85	2.41684	2.5435	2.28392	-0.231198	0.689171	NA	NA	NA	NA	NA	NA	NA	NA	NA	NA	NA	NA	NA	NA	NA	NA	NA	NA	NA	NA	NA	NA	NA	NA
752	common	chr16	2205440	2205852	5.28703	2.59444	938	202	5	2205726	2205748	CGCCCGCCGGGACGTGTAGTTC	7.7e-08	22	2	RP11-304L19.5	-287	-	lincRNA	5.41616	4.14893	3.67016	3.33914	-1.42838	0.0345493	TRAF7	53	+	protein_coding	4.6311	4.61824	4.71918	4.57833	-0.162187	0.641122	NA	NA	NA	NA	NA	NA	NA	NA	NA	NA	NA	NA	NA	NA
753	F80L absent	chr16	29687489	29688232	2.62343	1.06687	137	27	2	29687624	29687646	AGGAAGCTGGGAAATGTAGTTT	2.59e-09	1	0	NA	NA	NA	NA	NA	NA	NA	NA	NA	NA	NA	NA	NA	NA	NA	NA	NA	NA	NA	NA	NA	NA	NA	NA	NA	NA	NA	NA	NA	NA	NA	NA	NA	NA
754	F80L absent	chr20	48951809	48952411	2.14922	0.240806	105	33	2	48952125	48952147	AGCCTCCTGGTTTAAGCACTTC	0.00027	54	0	NA	NA	NA	NA	NA	NA	NA	NA	NA	NA	NA	NA	NA	NA	NA	NA	NA	NA	NA	NA	NA	NA	NA	NA	NA	NA	NA	NA	NA	NA	NA	NA	NA	NA
755	common	chr2	86332540	86332947	5.26058	2.64125	344	90	3	86332681	86332703	GTCCTGCTGGGAGCCGTAGTTC	3.89e-08	11	0	NA	NA	NA	NA	NA	NA	NA	NA	NA	NA	NA	NA	NA	NA	NA	NA	NA	NA	NA	NA	NA	NA	NA	NA	NA	NA	NA	NA	NA	NA	NA	NA	NA	NA
756	F80L absent	chr6	27440780	27441186	1.86808	0.805556	113	38	3	27440958	27440980	AGTGTTCTGGGAACGCTGGTCC	1.05e-05	15	1	ZNF184	-86	-	protein_coding	3.17313	3.15704	3.18428	3.14078	-0.029906	0.936133	NA	NA	NA	NA	NA	NA	NA	NA	NA	NA	NA	NA	NA	NA	NA	NA	NA	NA	NA	NA	NA	NA	NA	NA
757	common	chr9	126692437	126692684	4.22499	1.56224	287	58	3	126692479	126692501	GGGCTGCTGGGAAGTGTAGTCC	1.4e-10	9	1	DENND1A	-129	-	protein_coding	2.70929	2.58496	2.58256	2.56071	-0.00873896	0.985731	NA	NA	NA	NA	NA	NA	NA	NA	NA	NA	NA	NA	NA	NA	NA	NA	NA	NA	NA	NA	NA	NA	NA	NA
758	F80L absent	chr19	10827683	10828281	2.47334	0.784439	155	56	2	10828097	10828119	TGCGCTCTGGGACTTGTAGTTT	3e-09	8	0	NA	NA	NA	NA	NA	NA	NA	NA	NA	NA	NA	NA	NA	NA	NA	NA	NA	NA	NA	NA	NA	NA	NA	NA	NA	NA	NA	NA	NA	NA	NA	NA	NA	NA
759	common	chr19	4577504	4577891	2.95875	0.316259	174	52	2	4577612	4577634	GCCCCACTGGGAGGCAAGGCCC	0.000908	3	0	NA	NA	NA	NA	NA	NA	NA	NA	NA	NA	NA	NA	NA	NA	NA	NA	NA	NA	NA	NA	NA	NA	NA	NA	NA	NA	NA	NA	NA	NA	NA	NA	NA	NA
760	F80L absent	chr6	162914912	162915409	1.66406	1.47599	52	20	NA	NA	NA	NA	NA	NA	0	NA	NA	NA	NA	NA	NA	NA	NA	NA	NA	NA	NA	NA	NA	NA	NA	NA	NA	NA	NA	NA	NA	NA	NA	NA	NA	NA	NA	NA	NA	NA	NA	NA	NA
761	F80L absent	chr17	76579351	76579729	2.36727	0.287112	88	35	4	76579438	76579460	AGGAGGCTGGGAAATGTAGTCT	2.18e-09	45	0	NA	NA	NA	NA	NA	NA	NA	NA	NA	NA	NA	NA	NA	NA	NA	NA	NA	NA	NA	NA	NA	NA	NA	NA	NA	NA	NA	NA	NA	NA	NA	NA	NA	NA
762	common	chr1	2457359	2457852	6.28308	4.05088	2093	425	7	2457671	2457693	CGCCTGCCGGTAGCTGTAGTCC	4.89e-07	2	1	PANK4	434	-	protein_coding	4.15704	3.93452	4.04439	3.92505	-0.0740794	0.891928	NA	NA	NA	NA	NA	NA	NA	NA	NA	NA	NA	NA	NA	NA	NA	NA	NA	NA	NA	NA	NA	NA	NA	NA
763	F80L absent	chr17	75945009	75945761	2.53087	0.927124	88	22	1	75945125	75945147	GGAGTTCTGGGAAATGTAGTCC	1e-09	41	0	NA	NA	NA	NA	NA	NA	NA	NA	NA	NA	NA	NA	NA	NA	NA	NA	NA	NA	NA	NA	NA	NA	NA	NA	NA	NA	NA	NA	NA	NA	NA	NA	NA	NA
764	common	chr1	1550927	1551249	4.21705	1.40296	373	82	2	1551192	1551214	GGCCTCCTGGGAGTTGTGGTCC	3.38e-10	9	2	MIB2	-293	+	protein_coding	3.40463	2.58496	3.08066	2.24184	-0.336888	0.656727	RP11-345P4.9	87	-	ND	ND	ND	ND	ND	ND	ND	NA	NA	NA	NA	NA	NA	NA	NA	NA	NA	NA	NA	NA	NA
765	common	chr16	31119476	31119881	4.75591	2.46166	619	145	4	31119661	31119683	TGGGTCCTGGGAGTTGTAGTTT	1.32e-09	16	0	NA	NA	NA	NA	NA	NA	NA	NA	NA	NA	NA	NA	NA	NA	NA	NA	NA	NA	NA	NA	NA	NA	NA	NA	NA	NA	NA	NA	NA	NA	NA	NA	NA	NA
766	common	chr11	64577967	64578485	4.41367	2.16176	553	112	8	64578071	64578093	TACCCGCCGGGAAGTGGAGTCT	8.84e-07	20	0	NA	NA	NA	NA	NA	NA	NA	NA	NA	NA	NA	NA	NA	NA	NA	NA	NA	NA	NA	NA	NA	NA	NA	NA	NA	NA	NA	NA	NA	NA	NA	NA	NA	NA
767	common	chr19	55708892	55709252	3.68486	2.42267	210	64	3	55709048	55709070	AGCCTCATGGGAACTGTAGTTT	2.49e-09	10	0	NA	NA	NA	NA	NA	NA	NA	NA	NA	NA	NA	NA	NA	NA	NA	NA	NA	NA	NA	NA	NA	NA	NA	NA	NA	NA	NA	NA	NA	NA	NA	NA	NA	NA
768	common	chr1	26232854	26233243	3.95236	2.25364	428	91	3	26233031	26233053	GGGGTCCCGGGGGGCGGCGCTC	0.000595	9	2	MIR3917	-103	-	ND	ND	ND	ND	ND	ND	ND	STMN1	434	-	protein_coding	8.62972	8.82505	8.56228	8.91022	-0.0428723	0.897634	NA	NA	NA	NA	NA	NA	NA	NA	NA	NA	NA	NA	NA	NA
769	common	chr1	44820930	44821374	4.05396	1.24539	302	63	4	44821112	44821134	GGCCTTATGGGACTTGTAGTTT	3.66e-10	16	1	ERI3	-220	-	protein_coding	6.31524	6.2182	6.01792	6.13319	-0.207816	0.293781	NA	NA	NA	NA	NA	NA	NA	NA	NA	NA	NA	NA	NA	NA	NA	NA	NA	NA	NA	NA	NA	NA	NA	NA
770	F80L absent	chr6	64308589	64308969	2.97187	2.19697	81	32	3	64308843	64308865	AGGATTCTGGGAAATGTAGTTC	1.65e-11	70	0	NA	NA	NA	NA	NA	NA	NA	NA	NA	NA	NA	NA	NA	NA	NA	NA	NA	NA	NA	NA	NA	NA	NA	NA	NA	NA	NA	NA	NA	NA	NA	NA	NA	NA
771	F80L absent	chr9	44742025	44742309	2.96424	0.663519	35	8	NA	NA	NA	NA	NA	NA	0	NA	NA	NA	NA	NA	NA	NA	NA	NA	NA	NA	NA	NA	NA	NA	NA	NA	NA	NA	NA	NA	NA	NA	NA	NA	NA	NA	NA	NA	NA	NA	NA	NA	NA
772	F80L absent	chr3	120461019	120461514	3.51109	1.90954	177	55	1	120461160	120461182	AGTCCCCTGGGAAGTGTAGTCT	1.79e-08	15	1	GTF2E1	218	+	protein_coding	3.01078	2.78869	2.75489	2.88947	0.0037991	0.992747	NA	NA	NA	NA	NA	NA	NA	NA	NA	NA	NA	NA	NA	NA	NA	NA	NA	NA	NA	NA	NA	NA	NA	NA
773	common	chr19	6361362	6361740	4.45757	2.09717	453	98	3	6361572	6361594	GGCGTGCGGAGGGATGTGGCCC	0.000311	10	1	CLPP	-88	+	protein_coding	5.81916	5.44923	5.71864	5.58616	-0.0739626	0.897552	NA	NA	NA	NA	NA	NA	NA	NA	NA	NA	NA	NA	NA	NA	NA	NA	NA	NA	NA	NA	NA	NA	NA	NA
774	common	chr17	44271342	44271749	4.47265	2.74705	908	218	2	44271501	44271523	AGCCAGAGGGGAAGTGATGGCC	0.00026	16	0	NA	NA	NA	NA	NA	NA	NA	NA	NA	NA	NA	NA	NA	NA	NA	NA	NA	NA	NA	NA	NA	NA	NA	NA	NA	NA	NA	NA	NA	NA	NA	NA	NA	NA
775	F80L only	chr7	127747579	127748208	1.17297	-1.08833	53	23	NA	NA	NA	NA	NA	NA	0	NA	NA	NA	NA	NA	NA	NA	NA	NA	NA	NA	NA	NA	NA	NA	NA	NA	NA	NA	NA	NA	NA	NA	NA	NA	NA	NA	NA	NA	NA	NA	NA	NA	NA
776	F80L absent	chr5	1198879	1199178	2.02385	-0.296982	58	32	NA	NA	NA	NA	NA	NA	0	NA	NA	NA	NA	NA	NA	NA	NA	NA	NA	NA	NA	NA	NA	NA	NA	NA	NA	NA	NA	NA	NA	NA	NA	NA	NA	NA	NA	NA	NA	NA	NA	NA	NA
777	common	chr6	2765246	2765748	4.86623	2.63939	900	207	3	2765621	2765643	GGCGTGTCGGGAAGTGTAGTTC	4.81e-08	5	1	WRNIP1	151	+	protein_coding	5.43196	5.34021	5.63081	5.51254	0.129745	0.542846	NA	NA	NA	NA	NA	NA	NA	NA	NA	NA	NA	NA	NA	NA	NA	NA	NA	NA	NA	NA	NA	NA	NA	NA
778	F80L absent	chr19	59031001	59031471	2.42994	0.573021	150	38	1	59031266	59031288	AGACTGGCGGGAGCTGATCGCC	0.000256	36	0	NA	NA	NA	NA	NA	NA	NA	NA	NA	NA	NA	NA	NA	NA	NA	NA	NA	NA	NA	NA	NA	NA	NA	NA	NA	NA	NA	NA	NA	NA	NA	NA	NA	NA
779	common	chr10	81586401	81586902	4.40351	2.32093	461	110	1	81586599	81586621	AGCCCGTCGGGAGTCGTAGTCC	7.85e-08	10	1	RP11-773D16.1	-301	-	lincRNA	4.30086	4.41616	4.35614	4.91169	0.287379	0.66132	NA	NA	NA	NA	NA	NA	NA	NA	NA	NA	NA	NA	NA	NA	NA	NA	NA	NA	NA	NA	NA	NA	NA	NA
780	F80L absent	chr3	51533661	51534374	2.81614	1.10277	184	49	3	51534218	51534240	CGTCAATTGGGACTGGTGGGCC	0.00044	10	1	VPRBP	-7	-	protein_coding	4.98823	4.93357	4.98596	5.1235	0.0814963	0.755591	NA	NA	NA	NA	NA	NA	NA	NA	NA	NA	NA	NA	NA	NA	NA	NA	NA	NA	NA	NA	NA	NA	NA	NA
781	F80L absent	chr19	5057988	5058571	2.00599	0.49783	110	25	6	5058099	5058121	GGGAGGCTGGGAAATGTAGTCT	1.12e-09	7	0	NA	NA	NA	NA	NA	NA	NA	NA	NA	NA	NA	NA	NA	NA	NA	NA	NA	NA	NA	NA	NA	NA	NA	NA	NA	NA	NA	NA	NA	NA	NA	NA	NA	NA
782	F80L absent	chr6	33256948	33257581	2.2375	0.821372	66	19	5	33257297	33257319	CCCTTGATGGGAAGTGTAGTTC	4.59e-07	11	2	PFDN6	-185	+	protein_coding	5.60318	5.71149	5.67129	5.95536	0.16767	0.64558	WDR46	40	-	protein_coding	5.28947	5.42928	5.61589	5.65564	0.0719011	0.794667	NA	NA	NA	NA	NA	NA	NA	NA	NA	NA	NA	NA	NA	NA
783	common	chr2	242447896	242448354	5.79609	3.17115	1584	325	6	242448103	242448125	AGCCTGCCGGGACTTGTAGTCC	1e-09	10	0	NA	NA	NA	NA	NA	NA	NA	NA	NA	NA	NA	NA	NA	NA	NA	NA	NA	NA	NA	NA	NA	NA	NA	NA	NA	NA	NA	NA	NA	NA	NA	NA	NA	NA
784	F80L absent	chr15	77828040	77828512	2.68063	0.621221	141	41	4	77828262	77828284	AGCACTTTGGGAGGCCAAGGCG	9.68e-05	10	0	NA	NA	NA	NA	NA	NA	NA	NA	NA	NA	NA	NA	NA	NA	NA	NA	NA	NA	NA	NA	NA	NA	NA	NA	NA	NA	NA	NA	NA	NA	NA	NA	NA	NA
785	F80L absent	chr11	134526456	134526797	1.5196	-0.392011	101	19	NA	NA	NA	NA	NA	NA	0	NA	NA	NA	NA	NA	NA	NA	NA	NA	NA	NA	NA	NA	NA	NA	NA	NA	NA	NA	NA	NA	NA	NA	NA	NA	NA	NA	NA	NA	NA	NA	NA	NA	NA
786	common	chr3	97483206	97483467	3.29434	2.14146	131	31	4	97483328	97483350	AGCTTTCTGGGAAGCGTTTGGC	6.51e-05	4	1	ARL6	29	+	protein_coding	3.78031	3.69488	3.95977	3.80116	0.12624	0.756142	NA	NA	NA	NA	NA	NA	NA	NA	NA	NA	NA	NA	NA	NA	NA	NA	NA	NA	NA	NA	NA	NA	NA	NA
787	F80L only	chr19	877969	879736	0.327605	-1.43421	130	44	16	878482	878504	GGGCTGGTGGGCATTGACAGCC	0.000182	5	0	NA	NA	NA	NA	NA	NA	NA	NA	NA	NA	NA	NA	NA	NA	NA	NA	NA	NA	NA	NA	NA	NA	NA	NA	NA	NA	NA	NA	NA	NA	NA	NA	NA	NA
788	F80L absent	chr11	73358397	73358821	2.23614	0.191048	110	28	2	73358548	73358570	GGCGTACTGGGACTTGTAGTCT	9.24e-09	82	0	NA	NA	NA	NA	NA	NA	NA	NA	NA	NA	NA	NA	NA	NA	NA	NA	NA	NA	NA	NA	NA	NA	NA	NA	NA	NA	NA	NA	NA	NA	NA	NA	NA	NA
789	common	chr19	57106246	57106813	4.36534	1.7699	503	116	3	57106595	57106617	GGGTTTCTGGGAAGCGTAGTCC	7.64e-09	4	1	ZNF71	103	+	protein_coding	2.01078	1.60881	2.42223	2.13093	0.32928	0.51421	NA	NA	NA	NA	NA	NA	NA	NA	NA	NA	NA	NA	NA	NA	NA	NA	NA	NA	NA	NA	NA	NA	NA	NA
790	F80L absent	chr2	35041588	35041817	3.22837	0.381871	38	2	NA	NA	NA	NA	NA	NA	0	NA	NA	NA	NA	NA	NA	NA	NA	NA	NA	NA	NA	NA	NA	NA	NA	NA	NA	NA	NA	NA	NA	NA	NA	NA	NA	NA	NA	NA	NA	NA	NA	NA	NA
791	common	chr11	76155679	76156272	4.20607	2.35751	399	86	7	76156016	76156038	GGCCAGTCGGGAGGTGTAGTTC	1.5e-07	3	2	RP11-111M22.3	-275	-	lincRNA	3.62293	3.80839	2.82985	3.08406	-0.747147	0.0702055	C11orf30	-8	+	protein_coding	2.7137	2.9855	3.41414	3.67243	0.677639	0.00344041	NA	NA	NA	NA	NA	NA	NA	NA	NA	NA	NA	NA	NA	NA
792	F80L absent	chr10	123185773	123186347	2.36053	1.05285	70	29	3	123185949	123185971	GGGAGTCTGGGAAATGTAGTTT	6.06e-10	11	0	NA	NA	NA	NA	NA	NA	NA	NA	NA	NA	NA	NA	NA	NA	NA	NA	NA	NA	NA	NA	NA	NA	NA	NA	NA	NA	NA	NA	NA	NA	NA	NA	NA	NA
793	common	chr3	32147669	32148051	3.87553	1.63036	434	104	4	32147921	32147943	GGCACGTCGGGACATGTAGTCC	2.55e-08	14	0	NA	NA	NA	NA	NA	NA	NA	NA	NA	NA	NA	NA	NA	NA	NA	NA	NA	NA	NA	NA	NA	NA	NA	NA	NA	NA	NA	NA	NA	NA	NA	NA	NA	NA
794	common	chr17	70588864	70589161	3.59561	1.91247	299	76	3	70589040	70589062	GGCTTCCTGGGAGTCGTAGTTC	1.44e-09	28	0	NA	NA	NA	NA	NA	NA	NA	NA	NA	NA	NA	NA	NA	NA	NA	NA	NA	NA	NA	NA	NA	NA	NA	NA	NA	NA	NA	NA	NA	NA	NA	NA	NA	NA
795	common	chr10	124133841	124134272	5.61697	2.79611	1042	241	4	124134129	124134151	GGCCTGCCGGGACTCGTAGTCT	8.5e-09	35	1	PLEKHA1	156	+	protein_coding	4.81916	4.9222	5.07682	4.89239	0.0656615	0.793184	NA	NA	NA	NA	NA	NA	NA	NA	NA	NA	NA	NA	NA	NA	NA	NA	NA	NA	NA	NA	NA	NA	NA	NA
796	F80L absent	chr6	27342340	27343242	3.05506	1.25279	199	53	4	27343032	27343054	ACAACCCTGGGAAATGTAGTCT	5.51e-08	26	1	ZNF391	-397	+	protein_coding	1.56071	1.87971	1.70929	1.67807	0.125264	0.812624	NA	NA	NA	NA	NA	NA	NA	NA	NA	NA	NA	NA	NA	NA	NA	NA	NA	NA	NA	NA	NA	NA	NA	NA
797	common	chr19	37263622	37264119	4.52887	2.51215	387	109	2	37263776	37263798	GATCCTCTGGGAAATGTAGTCC	3.78e-08	15	2	ZNF850	-143	-	protein_coding	2.21412	2.29866	1.82375	1.73985	-0.530078	0.00144904	CTD-2162K18.4	185	+	ND	ND	ND	ND	ND	ND	ND	NA	NA	NA	NA	NA	NA	NA	NA	NA	NA	NA	NA	NA	NA
798	common	chr14	78266077	78266663	3.97216	2.1748	510	129	3	78266373	78266395	GGCCTGCCGGGACTTGTAGTTC	4.06e-10	22	1	ADCK1	56	+	protein_coding	2.20163	1.852	0.83996	0.526069	-1.49439	1.30751e-05	NA	NA	NA	NA	NA	NA	NA	NA	NA	NA	NA	NA	NA	NA	NA	NA	NA	NA	NA	NA	NA	NA	NA	NA
799	common	chr18	67872860	67873444	5.71248	3.83952	1035	264	5	67873185	67873207	CGCACGTCGGGAGTTGTAGTTC	2.98e-08	26	1	RTTN	29	-	protein_coding	3.54967	3.36737	3.84398	3.39232	0.193957	0.315839	NA	NA	NA	NA	NA	NA	NA	NA	NA	NA	NA	NA	NA	NA	NA	NA	NA	NA	NA	NA	NA	NA	NA	NA
800	common	chr17	21117188	21117912	6.16859	3.55422	2960	724	6	21117590	21117612	TGCCTTGTGGGCACGGTAGTTC	3.5e-07	22	2	TMEM11	387	-	protein_coding	4.41616	4.09085	4.1375	4.11187	-0.149332	0.701044	AC087294.2	94	+	antisense	-0.761213	-0.785875	0.584963	1.15056	1.81814	0.043059	NA	NA	NA	NA	NA	NA	NA	NA	NA	NA	NA	NA	NA	NA
801	common	chr2	69870905	69871268	3.4326	1.78625	284	71	2	69871108	69871130	GGCAAGCTGGGAAAGGTAGCTC	1.38e-07	1	0	NA	NA	NA	NA	NA	NA	NA	NA	NA	NA	NA	NA	NA	NA	NA	NA	NA	NA	NA	NA	NA	NA	NA	NA	NA	NA	NA	NA	NA	NA	NA	NA	NA	NA
802	F80L absent	chr9	130186299	130186926	3.38306	0.993314	174	54	4	130186593	130186615	CGACTTCTGGGAAATGGAGTCC	1.06e-08	35	1	ZNF79	49	+	protein_coding	2.36177	2.18269	2.32769	2.41143	0.0732165	0.899119	NA	NA	NA	NA	NA	NA	NA	NA	NA	NA	NA	NA	NA	NA	NA	NA	NA	NA	NA	NA	NA	NA	NA	NA
803	common	chr19	40696751	40697409	5.38461	3.104	1522	351	3	40697289	40697311	TGCCTCCTGGGAGTTGTAGTCT	2.87e-11	25	1	MAP3K10	571	+	protein_coding	2.42223	2.28096	2.39506	2.05658	-0.579713	0.381288	NA	NA	NA	NA	NA	NA	NA	NA	NA	NA	NA	NA	NA	NA	NA	NA	NA	NA	NA	NA	NA	NA	NA	NA
804	F80L absent	chr16	88383033	88383420	2.36923	0.243454	42	9	NA	NA	NA	NA	NA	NA	0	NA	NA	NA	NA	NA	NA	NA	NA	NA	NA	NA	NA	NA	NA	NA	NA	NA	NA	NA	NA	NA	NA	NA	NA	NA	NA	NA	NA	NA	NA	NA	NA	NA	NA
805	common	chr20	62694148	62694595	5.92408	3.38659	2332	513	8	62694423	62694445	TGGCGCCTGGGAGTTGTGGTCC	2.96e-08	4	0	NA	NA	NA	NA	NA	NA	NA	NA	NA	NA	NA	NA	NA	NA	NA	NA	NA	NA	NA	NA	NA	NA	NA	NA	NA	NA	NA	NA	NA	NA	NA	NA	NA	NA
806	common	chr21	43299325	43299575	5.22384	2.5924	465	85	2	43299475	43299497	GGCATGGCGGGACTTGTAGTCC	4e-09	15	1	PRDM15	141	-	protein_coding	2.45154	2.51602	2.27798	2.65764	-0.0422824	0.925103	NA	NA	NA	NA	NA	NA	NA	NA	NA	NA	NA	NA	NA	NA	NA	NA	NA	NA	NA	NA	NA	NA	NA	NA
807	F80L absent	chr6	167000175	167000557	2.40481	0.952563	80	21	2	167000391	167000413	GGAGGGCTGGGTAATGTAGTCC	3.28e-07	30	1	FAM103A2P	-401	-	pseudogene	3.31759	3.75809	3.42761	3.29572	-0.22539	0.818841	NA	NA	NA	NA	NA	NA	NA	NA	NA	NA	NA	NA	NA	NA	NA	NA	NA	NA	NA	NA	NA	NA	NA	NA
808	F80L absent	chr20	47095863	47096100	3.52409	0.854199	25	20	NA	NA	NA	NA	NA	NA	0	NA	NA	NA	NA	NA	NA	NA	NA	NA	NA	NA	NA	NA	NA	NA	NA	NA	NA	NA	NA	NA	NA	NA	NA	NA	NA	NA	NA	NA	NA	NA	NA	NA	NA
809	common	chr14	68141318	68141821	4.5926	2.95405	768	189	2	68141627	68141649	TGCACGCCGGGGGATGTAGTTT	1.86e-08	13	1	VTI1B	-21	-	protein_coding	5.71562	5.65793	4.62527	4.81711	-0.910396	5.25109e-14	NA	NA	NA	NA	NA	NA	NA	NA	NA	NA	NA	NA	NA	NA	NA	NA	NA	NA	NA	NA	NA	NA	NA	NA
810	common	chr19	54411277	54411810	3.97883	2.56593	678	198	3	54411548	54411570	GGGCTGATGGGAAATGTAGTCT	4.74e-10	5	0	NA	NA	NA	NA	NA	NA	NA	NA	NA	NA	NA	NA	NA	NA	NA	NA	NA	NA	NA	NA	NA	NA	NA	NA	NA	NA	NA	NA	NA	NA	NA	NA	NA	NA
811	F80L absent	chr7	932194	933362	2.33479	0.198439	128	35	4	932970	932992	GGCGTGGTGGTGGTTGCAGGTG	0.00023	23	0	NA	NA	NA	NA	NA	NA	NA	NA	NA	NA	NA	NA	NA	NA	NA	NA	NA	NA	NA	NA	NA	NA	NA	NA	NA	NA	NA	NA	NA	NA	NA	NA	NA	NA
812	common	chr16	577323	577753	5.8405	3.48316	2019	480	5	577532	577554	CGCCTCCCGGGGACCGAGGCCT	0.000263	24	1	CAPN15	179	+	protein_coding	3.5435	2.67129	2.98003	2.33628	-0.735985	0.169424	NA	NA	NA	NA	NA	NA	NA	NA	NA	NA	NA	NA	NA	NA	NA	NA	NA	NA	NA	NA	NA	NA	NA	NA
813	F80L absent	chr16	46949273	46949916	1.64277	0.0980469	73	24	NA	NA	NA	NA	NA	NA	0	NA	NA	NA	NA	NA	NA	NA	NA	NA	NA	NA	NA	NA	NA	NA	NA	NA	NA	NA	NA	NA	NA	NA	NA	NA	NA	NA	NA	NA	NA	NA	NA	NA	NA
814	common	chr15	91065692	91065958	2.39748	0.979436	180	44	3	91065760	91065782	AGCACTTTGGGAGGCCGAAGCT	0.000142	3	0	NA	NA	NA	NA	NA	NA	NA	NA	NA	NA	NA	NA	NA	NA	NA	NA	NA	NA	NA	NA	NA	NA	NA	NA	NA	NA	NA	NA	NA	NA	NA	NA	NA	NA
815	F80L absent	chr17	72388841	72389396	2.22133	1.01796	67	30	NA	NA	NA	NA	NA	NA	0	NA	NA	NA	NA	NA	NA	NA	NA	NA	NA	NA	NA	NA	NA	NA	NA	NA	NA	NA	NA	NA	NA	NA	NA	NA	NA	NA	NA	NA	NA	NA	NA	NA	NA
816	F80L absent	chr19	2456973	2457418	2.63232	0.866172	203	62	4	2457037	2457059	GGCACGCCGGAAGTTGAAGTCT	2.54e-07	15	1	LMNB2	-201	-	protein_coding	6.32661	5.94111	6.0917	6.02879	-0.522105	0.496903	NA	NA	NA	NA	NA	NA	NA	NA	NA	NA	NA	NA	NA	NA	NA	NA	NA	NA	NA	NA	NA	NA	NA	NA
817	common	chr4	2964993	2965523	5.22903	2.72984	1244	282	2	2965282	2965304	GGCCTTCTGGGAGCTGTAGTGC	6.39e-10	0	2	NOP14	-146	-	protein_coding	5.96371	5.86641	5.972	6.21897	0.147054	0.51644	GRK4	77	+	protein_coding	2.88947	2.74201	3.67129	3.49953	0.764965	0.000436646	NA	NA	NA	NA	NA	NA	NA	NA	NA	NA	NA	NA	NA	NA
818	F80L absent	chr5	70363449	70363692	3.68765	0.744743	29	5	NA	NA	NA	NA	NA	NA	1	GTF2H2	-54	-	protein_coding	5.58526	5.67976	5.67384	5.57531	-0.0399358	0.890202	NA	NA	NA	NA	NA	NA	NA	NA	NA	NA	NA	NA	NA	NA	NA	NA	NA	NA	NA	NA	NA	NA	NA	NA
819	common	chr19	50353756	50354293	3.93626	1.87432	475	128	3	50353932	50353954	GGCCCGCTGGGAGTTGGAGTCC	4.91e-10	5	1	PTOV1	-32	+	protein_coding	7.24031	6.82591	6.90316	6.55796	-0.29331	0.227358	NA	NA	NA	NA	NA	NA	NA	NA	NA	NA	NA	NA	NA	NA	NA	NA	NA	NA	NA	NA	NA	NA	NA	NA
820	F80L absent	chr6	6890778	6891162	3.38222	1.13629	78	20	3	6891003	6891025	GGGGACCTGGGAAATGTAGTTC	2.23e-08	50	0	NA	NA	NA	NA	NA	NA	NA	NA	NA	NA	NA	NA	NA	NA	NA	NA	NA	NA	NA	NA	NA	NA	NA	NA	NA	NA	NA	NA	NA	NA	NA	NA	NA	NA
821	F80L absent	chr16	28564719	28565517	2.32231	0.51107	142	49	3	28565175	28565197	TGCCCCGTGGGAAATGTAGTTT	2.13e-09	7	1	CCDC101	118	+	protein_coding	4.2211	3.66334	2.57773	2.74201	-1.16997	9.86098e-05	NA	NA	NA	NA	NA	NA	NA	NA	NA	NA	NA	NA	NA	NA	NA	NA	NA	NA	NA	NA	NA	NA	NA	NA
822	common	chr20	20033130	20033568	3.63384	0.981603	137	26	2	20033433	20033455	CGCATGCTGGGAATGGTAGTTT	1.56e-09	22	1	C20orf26	-191	+	ND	ND	ND	ND	ND	ND	ND	NA	NA	NA	NA	NA	NA	NA	NA	NA	NA	NA	NA	NA	NA	NA	NA	NA	NA	NA	NA	NA	NA	NA	NA
823	common	chr11	65487997	65488820	4.4111	2.83693	1167	315	4	65488020	65488042	GGGCTGCCGGGAGCCGTAGTCC	2.18e-08	22	1	RNASEH2C	10	-	protein_coding	5.40054	4.9607	4.9279	4.7301	-0.171814	0.436302	NA	NA	NA	NA	NA	NA	NA	NA	NA	NA	NA	NA	NA	NA	NA	NA	NA	NA	NA	NA	NA	NA	NA	NA
824	common	chr1	93645951	93646391	5.0458	2.6314	901	215	4	93646118	93646140	GTAATTGTGGGAAATGTAGTCC	2.8e-08	23	1	TMED5	114	-	protein_coding	5.93522	5.90472	6.04308	5.85699	0.0385644	0.8846	NA	NA	NA	NA	NA	NA	NA	NA	NA	NA	NA	NA	NA	NA	NA	NA	NA	NA	NA	NA	NA	NA	NA	NA
825	common	chr10	89102418	89102903	4.57648	2.14141	636	171	1	89102641	89102663	AGCCCGTCGGGAGTCGTAGTCC	7.85e-08	8	2	NUTM2A-AS1	-291	-	antisense	4.42021	4.35755	4.54782	4.53294	0.201668	0.513056	LINC00863	-167	+	lincRNA	1.40054	1.30451	1.23879	1.22651	-0.142807	0.787252	NA	NA	NA	NA	NA	NA	NA	NA	NA	NA	NA	NA	NA	NA
826	common	chr9	34376984	34377470	4.65672	2.96848	572	135	3	34377193	34377215	GGCCTGCTGGGACATGTAGTTC	5.78e-11	9	1	KIAA1161	-376	-	ND	ND	ND	ND	ND	ND	ND	NA	NA	NA	NA	NA	NA	NA	NA	NA	NA	NA	NA	NA	NA	NA	NA	NA	NA	NA	NA	NA	NA	NA	NA
827	F80L absent	chr19	57900934	57901418	3.42171	1.68806	165	43	3	57901121	57901143	TGTCTTCTGGGTTATGAAGTTT	3.61e-07	15	2	ZNF548	42	+	protein_coding	3.5097	3.6792	3.926	3.94392	0.439074	0.0311366	AC003002.6	76	+	protein_coding	0.163499	0.650765	1.40599	1.04264	0.800868	0.562909	NA	NA	NA	NA	NA	NA	NA	NA	NA	NA	NA	NA	NA	NA
828	common	chr8	109799763	109800087	3.85594	2.56371	261	81	3	109799881	109799903	AGCATCCCGGGAGTTGTAGGCC	5.43e-09	30	1	TMEM74	-81	-	protein_coding	1.7866	1.57531	2.28392	2.31615	0.596325	0.126258	NA	NA	NA	NA	NA	NA	NA	NA	NA	NA	NA	NA	NA	NA	NA	NA	NA	NA	NA	NA	NA	NA	NA	NA
829	F80L absent	chr7	141264295	141264767	1.93723	0.298772	67	22	3	141264354	141264376	GGGATTATGGGAACTGTAGTTC	6.22e-10	74	0	NA	NA	NA	NA	NA	NA	NA	NA	NA	NA	NA	NA	NA	NA	NA	NA	NA	NA	NA	NA	NA	NA	NA	NA	NA	NA	NA	NA	NA	NA	NA	NA	NA	NA
830	common	chr17	74733781	74734203	4.83725	2.6638	717	181	4	74734008	74734030	GGCCCGCTGGGAAACGTAGTCC	7.21e-10	1	0	NA	NA	NA	NA	NA	NA	NA	NA	NA	NA	NA	NA	NA	NA	NA	NA	NA	NA	NA	NA	NA	NA	NA	NA	NA	NA	NA	NA	NA	NA	NA	NA	NA	NA
831	F80L absent	chr20	22635195	22635475	2.39793	0.272501	12	3	NA	NA	NA	NA	NA	NA	0	NA	NA	NA	NA	NA	NA	NA	NA	NA	NA	NA	NA	NA	NA	NA	NA	NA	NA	NA	NA	NA	NA	NA	NA	NA	NA	NA	NA	NA	NA	NA	NA	NA	NA
832	F80L absent	chr6	155950831	155951216	2.84953	0.641463	60	24	NA	NA	NA	NA	NA	NA	0	NA	NA	NA	NA	NA	NA	NA	NA	NA	NA	NA	NA	NA	NA	NA	NA	NA	NA	NA	NA	NA	NA	NA	NA	NA	NA	NA	NA	NA	NA	NA	NA	NA	NA
833	common	chr19	58125294	58125686	3.35871	1.13386	180	42	3	58125505	58125527	AGGTTTCTGGGCAATGCAGTTC	4.95e-07	31	1	ZNF134	111	+	protein_coding	3.0321	3.12598	3.65992	3.75702	0.656046	0.000124136	NA	NA	NA	NA	NA	NA	NA	NA	NA	NA	NA	NA	NA	NA	NA	NA	NA	NA	NA	NA	NA	NA	NA	NA
834	F80L absent	chrX	128248725	128249158	1.17132	0	73	26	NA	NA	NA	NA	NA	NA	0	NA	NA	NA	NA	NA	NA	NA	NA	NA	NA	NA	NA	NA	NA	NA	NA	NA	NA	NA	NA	NA	NA	NA	NA	NA	NA	NA	NA	NA	NA	NA	NA	NA	NA
835	common	chr1	149870908	149871259	4.26683	2.854	353	87	3	149871113	149871135	GGCACGCTGGGAAATGGAGTCC	4.64e-10	24	0	NA	NA	NA	NA	NA	NA	NA	NA	NA	NA	NA	NA	NA	NA	NA	NA	NA	NA	NA	NA	NA	NA	NA	NA	NA	NA	NA	NA	NA	NA	NA	NA	NA	NA
836	common	chr5	102898410	102898752	4.63653	2.23971	256	60	3	102898600	102898622	TGGAGATTGGGGGTGGAAGTGT	0.000123	23	1	NUDT12	-87	-	protein_coding	4.36036	4.40327	3.47768	3.38957	-0.998677	5.27442e-15	NA	NA	NA	NA	NA	NA	NA	NA	NA	NA	NA	NA	NA	NA	NA	NA	NA	NA	NA	NA	NA	NA	NA	NA
837	common	chr2	128643823	128644220	4.98471	2.5863	407	104	1	128644030	128644052	AGCCCGTCGGGAGTCGTAGTCC	7.85e-08	18	1	RP11-395A13.2	109	+	lincRNA	2.88753	3.04963	2.37295	2.22651	-0.704823	0.213247	NA	NA	NA	NA	NA	NA	NA	NA	NA	NA	NA	NA	NA	NA	NA	NA	NA	NA	NA	NA	NA	NA	NA	NA
838	common	chr20	33264757	33265238	4.55375	2.67494	766	192	2	33265017	33265039	GGCTTTCTGGGAGCCGTAGTCC	4.31e-09	13	1	PIGU	-87	-	protein_coding	3.99095	3.87381	3.91456	4.09339	0.00729067	0.987644	NA	NA	NA	NA	NA	NA	NA	NA	NA	NA	NA	NA	NA	NA	NA	NA	NA	NA	NA	NA	NA	NA	NA	NA
839	common	chr20	18477776	18478097	4.34799	2.38389	266	71	3	18477891	18477913	GGCATCCTGGGAGTTGTAGTTG	1.49e-10	9	1	RBBP9	-49	-	protein_coding	3.61471	3.62761	2.94673	3.03386	-0.696615	1.47069e-06	NA	NA	NA	NA	NA	NA	NA	NA	NA	NA	NA	NA	NA	NA	NA	NA	NA	NA	NA	NA	NA	NA	NA	NA
840	common	chr16	28857709	28858074	4.19031	2.14724	337	79	6	28857938	28857960	AGGTCGGCGGGCTGTGGAGGTG	0.00058	3	2	TUFM	-162	-	protein_coding	7.2267	7.03694	6.97911	7.06286	-0.346847	0.0168617	SH2B1	30	+	protein_coding	3.23419	3.57652	2.9782	3.05832	-0.169098	0.543677	NA	NA	NA	NA	NA	NA	NA	NA	NA	NA	NA	NA	NA	NA
841	F80L absent	chr1	3610264	3611421	0.665661	-0.18217	75	33	NA	NA	NA	NA	NA	NA	0	NA	NA	NA	NA	NA	NA	NA	NA	NA	NA	NA	NA	NA	NA	NA	NA	NA	NA	NA	NA	NA	NA	NA	NA	NA	NA	NA	NA	NA	NA	NA	NA	NA	NA
842	common	chr20	30945773	30946307	5.14514	2.90429	644	147	4	30945977	30945999	GGCACGCCGGGAAGTGTGGTCC	1.84e-08	2	1	ASXL1	115	+	protein_coding	4.83794	4.87184	5.03738	5.07852	0.119894	0.488249	NA	NA	NA	NA	NA	NA	NA	NA	NA	NA	NA	NA	NA	NA	NA	NA	NA	NA	NA	NA	NA	NA	NA	NA
843	F80L absent	chr7	133811729	133812288	3.36257	2.09622	124	44	2	133812046	133812068	AGGATTCTGGGGCCTGTAGTCT	3.09e-08	13	1	LRGUK	44	+	ND	ND	ND	ND	ND	ND	ND	NA	NA	NA	NA	NA	NA	NA	NA	NA	NA	NA	NA	NA	NA	NA	NA	NA	NA	NA	NA	NA	NA	NA	NA
844	common	chr12	9102457	9102835	4.1998	1.81642	268	80	4	9102622	9102644	GGCTCCGCGGGAGTTGTAGTTC	2.76e-08	11	2	M6PR	-95	-	protein_coding	5.82299	6.15117	6.19594	6.33128	0.0814477	0.717249	KLRG1	-6	+	protein_coding	1.73552	1.73552	1.91456	1.86394	0.166019	0.854321	NA	NA	NA	NA	NA	NA	NA	NA	NA	NA	NA	NA	NA	NA
845	common	chr1	84763965	84764237	3.95778	2.3394	366	87	2	84764137	84764159	GGCACGCCGGGAGTTGTAGTCC	2.53e-10	9	1	SAMD13	-52	+	ND	ND	ND	ND	ND	ND	ND	NA	NA	NA	NA	NA	NA	NA	NA	NA	NA	NA	NA	NA	NA	NA	NA	NA	NA	NA	NA	NA	NA	NA	NA
846	common	chr14	97263389	97263752	5.38738	3.0074	358	98	3	97263563	97263585	GGAATGCCGGGAGCTGTGGTCC	4.87e-08	24	1	VRK1	71	+	protein_coding	5.92053	6.09677	5.71452	5.73606	-0.412958	0.00568829	NA	NA	NA	NA	NA	NA	NA	NA	NA	NA	NA	NA	NA	NA	NA	NA	NA	NA	NA	NA	NA	NA	NA	NA
847	common	chr19	37568991	37569582	4.21901	2.56066	812	206	4	37569239	37569261	GTGCCTCTGGGAAATGTAGTCC	5.38e-09	1	1	CTD-2293H3.2	221	-	ND	ND	ND	ND	ND	ND	ND	NA	NA	NA	NA	NA	NA	NA	NA	NA	NA	NA	NA	NA	NA	NA	NA	NA	NA	NA	NA	NA	NA	NA	NA
848	common	chr3	48230064	48230383	3.95787	1.71567	233	73	2	48230193	48230215	CGCATGCTGGGAAGCGTAGTTC	5.87e-09	5	1	CDC25A	-331	-	protein_coding	5.72028	5.58225	5.85474	5.76792	0.106269	0.580453	NA	NA	NA	NA	NA	NA	NA	NA	NA	NA	NA	NA	NA	NA	NA	NA	NA	NA	NA	NA	NA	NA	NA	NA
849	F80L absent	chr10	99486393	99486777	2.61734	1.05481	75	27	2	99486583	99486605	AGGATGCTGGGAAATGTAGTCC	3.57e-11	25	0	NA	NA	NA	NA	NA	NA	NA	NA	NA	NA	NA	NA	NA	NA	NA	NA	NA	NA	NA	NA	NA	NA	NA	NA	NA	NA	NA	NA	NA	NA	NA	NA	NA	NA
850	F80L absent	chr16	71410375	71410703	2.86665	1.26219	28	7	NA	NA	NA	NA	NA	NA	0	NA	NA	NA	NA	NA	NA	NA	NA	NA	NA	NA	NA	NA	NA	NA	NA	NA	NA	NA	NA	NA	NA	NA	NA	NA	NA	NA	NA	NA	NA	NA	NA	NA	NA
851	F80L absent	chr13	112868998	112869762	1.0898	-0.785197	81	20	NA	NA	NA	NA	NA	NA	0	NA	NA	NA	NA	NA	NA	NA	NA	NA	NA	NA	NA	NA	NA	NA	NA	NA	NA	NA	NA	NA	NA	NA	NA	NA	NA	NA	NA	NA	NA	NA	NA	NA	NA
852	F80L absent	chr7	99717458	99718043	3.22077	1.32661	142	59	2	99717722	99717744	TGGATTGTGGGAATTGTAGTTC	1.4e-10	17	2	TAF6	-286	-	protein_coding	4.29425	4.36387	4.30232	4.4121	-0.279972	0.295566	CNPY4	-514	+	protein_coding	3.27202	3.41549	3.96809	3.74308	0.535531	0.0372631	NA	NA	NA	NA	NA	NA	NA	NA	NA	NA	NA	NA	NA	NA
853	common	chr9	111663033	111663250	2.21471	-0.518669	59	14	NA	NA	NA	NA	NA	NA	0	NA	NA	NA	NA	NA	NA	NA	NA	NA	NA	NA	NA	NA	NA	NA	NA	NA	NA	NA	NA	NA	NA	NA	NA	NA	NA	NA	NA	NA	NA	NA	NA	NA	NA
854	F80L only	chr9	78921059	78922254	1.28254	1.13961	22	21	3	78922124	78922146	GCATAGCTGGGATCTGAAGGCA	0.000333	97	0	NA	NA	NA	NA	NA	NA	NA	NA	NA	NA	NA	NA	NA	NA	NA	NA	NA	NA	NA	NA	NA	NA	NA	NA	NA	NA	NA	NA	NA	NA	NA	NA	NA	NA
855	common	chr16	68482403	68482895	5.17257	3.02606	786	190	3	68482606	68482628	AGCCTTCTGGGACTTATAGTTC	3.47e-09	16	1	SMPD3	-58	-	ND	ND	ND	ND	ND	ND	ND	NA	NA	NA	NA	NA	NA	NA	NA	NA	NA	NA	NA	NA	NA	NA	NA	NA	NA	NA	NA	NA	NA	NA	NA
856	F80L absent	chr9	138031340	138031577	2.52939	0.333513	46	17	NA	NA	NA	NA	NA	NA	0	NA	NA	NA	NA	NA	NA	NA	NA	NA	NA	NA	NA	NA	NA	NA	NA	NA	NA	NA	NA	NA	NA	NA	NA	NA	NA	NA	NA	NA	NA	NA	NA	NA	NA
857	F80L absent	chr6	151200386	151200675	1.14543	-0.223082	92	27	3	151200502	151200524	TTGAACCCGGGAGGTAGAGGTT	0.000278	26	0	NA	NA	NA	NA	NA	NA	NA	NA	NA	NA	NA	NA	NA	NA	NA	NA	NA	NA	NA	NA	NA	NA	NA	NA	NA	NA	NA	NA	NA	NA	NA	NA	NA	NA
858	common	chr12	57881565	57881967	4.0026	2.2876	301	84	3	57881782	57881804	GGCACGCCGGGAAATGGAGTTC	3.45e-09	6	0	NA	NA	NA	NA	NA	NA	NA	NA	NA	NA	NA	NA	NA	NA	NA	NA	NA	NA	NA	NA	NA	NA	NA	NA	NA	NA	NA	NA	NA	NA	NA	NA	NA	NA
859	common	chr7	150780514	150780937	4.1331	1.9334	579	138	5	150780627	150780649	GGCATTGTGGAACTTGTAGTCC	1.77e-08	20	1	TMUB1	-92	-	protein_coding	4.1811	3.16027	2.69599	2.02857	-1.00117	0.053771	NA	NA	NA	NA	NA	NA	NA	NA	NA	NA	NA	NA	NA	NA	NA	NA	NA	NA	NA	NA	NA	NA	NA	NA
860	F80L absent	chr13	113765859	113766275	1.81906	0	67	24	6	113766084	113766106	TGTCTTGTGTGAGGTGTCCTGT	0.000557	20	0	NA	NA	NA	NA	NA	NA	NA	NA	NA	NA	NA	NA	NA	NA	NA	NA	NA	NA	NA	NA	NA	NA	NA	NA	NA	NA	NA	NA	NA	NA	NA	NA	NA	NA
861	F80L absent	chr12	128603933	128604320	3.03852	0.195787	28	4	NA	NA	NA	NA	NA	NA	0	NA	NA	NA	NA	NA	NA	NA	NA	NA	NA	NA	NA	NA	NA	NA	NA	NA	NA	NA	NA	NA	NA	NA	NA	NA	NA	NA	NA	NA	NA	NA	NA	NA	NA
862	F80L absent	chr5	137514205	137514647	3.56274	1.51115	107	31	3	137514359	137514381	GGAATTCTGGGAAATAGTGTAC	3.57e-06	17	2	KIF20A	-18	+	protein_coding	5.99729	5.94462	6.1635	6.15279	0.133275	0.374229	BRD8	249	-	protein_coding	5.95768	6.13134	6.52372	6.64111	0.401962	0.013335	NA	NA	NA	NA	NA	NA	NA	NA	NA	NA	NA	NA	NA	NA
863	F80L only	chr1	161439898	161440138	2.76747	0	14	0	3	161439982	161440004	AGCTCTCTGGGCGCCGTGGGGG	0.000269	24	0	NA	NA	NA	NA	NA	NA	NA	NA	NA	NA	NA	NA	NA	NA	NA	NA	NA	NA	NA	NA	NA	NA	NA	NA	NA	NA	NA	NA	NA	NA	NA	NA	NA	NA
864	F80L absent	chr5	142214	142739	1.39442	-0.095388	48	24	NA	NA	NA	NA	NA	NA	0	NA	NA	NA	NA	NA	NA	NA	NA	NA	NA	NA	NA	NA	NA	NA	NA	NA	NA	NA	NA	NA	NA	NA	NA	NA	NA	NA	NA	NA	NA	NA	NA	NA	NA
865	F80L absent	chrX	17265363	17265678	1.94476	0.169127	86	33	2	17265435	17265457	GGGAGGCTGGGAAATGTAGTCC	7.97e-10	7	0	NA	NA	NA	NA	NA	NA	NA	NA	NA	NA	NA	NA	NA	NA	NA	NA	NA	NA	NA	NA	NA	NA	NA	NA	NA	NA	NA	NA	NA	NA	NA	NA	NA	NA
866	common	chr10	88281453	88282118	5.2086	2.5701	1275	312	8	88281673	88281695	AGCCCGACGGGAGTTGTAGTCC	5.87e-09	1	2	WAPAL	-213	-	protein_coding	5.68117	5.59276	5.86121	5.75382	0.0913254	0.621407	RP11-77P6.2	-83	+	ND	ND	ND	ND	ND	ND	ND	NA	NA	NA	NA	NA	NA	NA	NA	NA	NA	NA	NA	NA	NA
867	common	chr19	1407266	1407543	4.82447	2.28357	416	113	3	1407380	1407402	GGCACGCTGGGAAATGGAGTCC	4.64e-10	3	1	DAZAP1	164	+	protein_coding	6.79649	6.71658	6.63575	6.8392	-0.273231	0.101836	NA	NA	NA	NA	NA	NA	NA	NA	NA	NA	NA	NA	NA	NA	NA	NA	NA	NA	NA	NA	NA	NA	NA	NA
868	common	chr22	20861566	20862086	5.07072	3.00394	674	189	3	20861820	20861842	GGGCTTGTGGGAAATGGAGTCT	4.71e-09	7	0	NA	NA	NA	NA	NA	NA	NA	NA	NA	NA	NA	NA	NA	NA	NA	NA	NA	NA	NA	NA	NA	NA	NA	NA	NA	NA	NA	NA	NA	NA	NA	NA	NA	NA
869	common	chr19	49416434	49416706	5.28062	2.34825	220	57	5	49416525	49416547	GGGCCCCTGGGAATTGTAGTTC	1.13e-10	10	0	NA	NA	NA	NA	NA	NA	NA	NA	NA	NA	NA	NA	NA	NA	NA	NA	NA	NA	NA	NA	NA	NA	NA	NA	NA	NA	NA	NA	NA	NA	NA	NA	NA	NA
870	F80L absent	chr5	486937	487734	1.49077	-0.402878	110	51	NA	NA	NA	NA	NA	NA	0	NA	NA	NA	NA	NA	NA	NA	NA	NA	NA	NA	NA	NA	NA	NA	NA	NA	NA	NA	NA	NA	NA	NA	NA	NA	NA	NA	NA	NA	NA	NA	NA	NA	NA
871	common	chr4	159593039	159593478	4.53465	2.32819	283	88	4	159593328	159593350	CCCCGGCTGGGACTTGGAGTCC	1.72e-06	58	2	C4orf46	149	-	protein_coding	3.66334	3.98094	4.20633	4.05137	0.204803	0.3793	ETFDH	19	+	protein_coding	4.63459	4.67864	4.66732	4.55397	0.0114993	0.97253	NA	NA	NA	NA	NA	NA	NA	NA	NA	NA	NA	NA	NA	NA
872	common	chr4	2537938	2538417	5.34866	3.30635	1128	290	4	2538137	2538159	GGCCTGACGGGAATCGTGGTCC	7.8e-08	11	0	NA	NA	NA	NA	NA	NA	NA	NA	NA	NA	NA	NA	NA	NA	NA	NA	NA	NA	NA	NA	NA	NA	NA	NA	NA	NA	NA	NA	NA	NA	NA	NA	NA	NA
873	common	chr17	7142736	7143408	5.53807	3.07845	1607	388	5	7142899	7142921	TGCACCAAGGGTTTTGTAGTCC	2.68e-06	16	1	PHF23	-31	-	protein_coding	5.37365	5.21529	5.74819	5.73904	0.44221	0.000508902	NA	NA	NA	NA	NA	NA	NA	NA	NA	NA	NA	NA	NA	NA	NA	NA	NA	NA	NA	NA	NA	NA	NA	NA
874	common	chr9	37120074	37120408	3.8031	2.22355	183	59	2	37120219	37120241	GTCCTCATGGGGGTTGTAGTTT	1.57e-07	25	1	ZCCHC7	295	+	protein_coding	3.31759	3.56438	3.6311	3.65306	0.144656	0.657583	NA	NA	NA	NA	NA	NA	NA	NA	NA	NA	NA	NA	NA	NA	NA	NA	NA	NA	NA	NA	NA	NA	NA	NA
875	common	chr9	34049326	34049655	4.62681	2.72703	350	98	4	34049480	34049502	TGCCTGCTGGGAGGTGTAGTCC	1.03e-10	3	0	NA	NA	NA	NA	NA	NA	NA	NA	NA	NA	NA	NA	NA	NA	NA	NA	NA	NA	NA	NA	NA	NA	NA	NA	NA	NA	NA	NA	NA	NA	NA	NA	NA	NA
876	F80L absent	chr6	168475105	168475706	1.55191	0.176733	82	20	2	168474979	168475001	GGGCTTCTGGAAACCTCTGTAC	0.000526	172	0	NA	NA	NA	NA	NA	NA	NA	NA	NA	NA	NA	NA	NA	NA	NA	NA	NA	NA	NA	NA	NA	NA	NA	NA	NA	NA	NA	NA	NA	NA	NA	NA	NA	NA
877	common	chr19	55816782	55817245	5.42373	3.43617	495	143	6	55816992	55817014	GGGCTGCTGGGACTTGTAGTTC	1.04e-10	1	0	NA	NA	NA	NA	NA	NA	NA	NA	NA	NA	NA	NA	NA	NA	NA	NA	NA	NA	NA	NA	NA	NA	NA	NA	NA	NA	NA	NA	NA	NA	NA	NA	NA	NA
878	common	chr19	58891945	58892665	4.27022	2.80104	1116	280	3	58892104	58892126	GTCCCGCCCGGAACTCAAGGTC	0.00066	74	1	ZNF837	122	-	ND	ND	ND	ND	ND	ND	ND	NA	NA	NA	NA	NA	NA	NA	NA	NA	NA	NA	NA	NA	NA	NA	NA	NA	NA	NA	NA	NA	NA	NA	NA
879	F80L only	chr4	190767548	190768284	0.464655	-1.63568	58	23	NA	NA	NA	NA	NA	NA	0	NA	NA	NA	NA	NA	NA	NA	NA	NA	NA	NA	NA	NA	NA	NA	NA	NA	NA	NA	NA	NA	NA	NA	NA	NA	NA	NA	NA	NA	NA	NA	NA	NA	NA
880	F80L absent	chr2	1832814	1833270	2.22949	0.311968	45	16	10	1833040	1833062	AGGTGTATGGGAGGGTCAGTTC	0.000139	57	0	NA	NA	NA	NA	NA	NA	NA	NA	NA	NA	NA	NA	NA	NA	NA	NA	NA	NA	NA	NA	NA	NA	NA	NA	NA	NA	NA	NA	NA	NA	NA	NA	NA	NA
881	common	chr14	65453573	65454177	4.46818	2.94227	482	125	3	65453881	65453903	GGCCGCCCGGGTGCGGAACTCA	0.000385	2	0	NA	NA	NA	NA	NA	NA	NA	NA	NA	NA	NA	NA	NA	NA	NA	NA	NA	NA	NA	NA	NA	NA	NA	NA	NA	NA	NA	NA	NA	NA	NA	NA	NA	NA
882	F80L absent	chr4	139788298	139788832	2.12789	0.0558172	53	21	NA	NA	NA	NA	NA	NA	0	NA	NA	NA	NA	NA	NA	NA	NA	NA	NA	NA	NA	NA	NA	NA	NA	NA	NA	NA	NA	NA	NA	NA	NA	NA	NA	NA	NA	NA	NA	NA	NA	NA	NA
883	F80L absent	chr19	49850745	49851287	2.81334	1.35356	96	34	2	49850814	49850836	AGGGAGTTGGGGACTGTAGGAC	0.000127	112	0	NA	NA	NA	NA	NA	NA	NA	NA	NA	NA	NA	NA	NA	NA	NA	NA	NA	NA	NA	NA	NA	NA	NA	NA	NA	NA	NA	NA	NA	NA	NA	NA	NA	NA
884	common	chr2	178483570	178483901	3.94479	2.20276	171	58	2	178483713	178483735	TGCATGCTGGGAGGCGTAGTCC	1.29e-09	8	1	TTC30A	-41	-	protein_coding	1.74416	1.83188	1.72683	1.68706	-0.10572	0.764803	NA	NA	NA	NA	NA	NA	NA	NA	NA	NA	NA	NA	NA	NA	NA	NA	NA	NA	NA	NA	NA	NA	NA	NA
885	F80L absent	chr1	161419223	161419879	2.84974	0.230032	48	7	NA	NA	NA	NA	NA	NA	0	NA	NA	NA	NA	NA	NA	NA	NA	NA	NA	NA	NA	NA	NA	NA	NA	NA	NA	NA	NA	NA	NA	NA	NA	NA	NA	NA	NA	NA	NA	NA	NA	NA	NA
886	common	chr17	65789	66093	2.54183	0.192431	137	45	2	65694	65716	AGCCATGTGGGTGGGGTGGGGG	0.000578	149	0	NA	NA	NA	NA	NA	NA	NA	NA	NA	NA	NA	NA	NA	NA	NA	NA	NA	NA	NA	NA	NA	NA	NA	NA	NA	NA	NA	NA	NA	NA	NA	NA	NA	NA
887	common	chr5	171433492	171434102	5.1173	3.16132	1282	308	4	171433683	171433705	CGCCTGCTGGGAGGTGTAGTCC	1e-09	2	1	FBXW11	80	-	protein_coding	5.36282	5.29278	5.59574	5.49665	0.143995	0.412618	NA	NA	NA	NA	NA	NA	NA	NA	NA	NA	NA	NA	NA	NA	NA	NA	NA	NA	NA	NA	NA	NA	NA	NA
888	common	chr19	58071139	58071522	3.42475	1.93099	177	68	2	58071279	58071301	TGCCTTCTAGGTAATGTAGTCT	5.36e-08	44	1	ZNF550	-99	-	protein_coding	1.9486	2.24793	2.26003	2.31325	0.0941768	0.853121	NA	NA	NA	NA	NA	NA	NA	NA	NA	NA	NA	NA	NA	NA	NA	NA	NA	NA	NA	NA	NA	NA	NA	NA
889	common	chr19	15490523	15490932	4.06186	2.08402	532	132	3	15490739	15490761	GGCCTAATGGGAGTTGTGGTCC	1.47e-08	4	1	AKAP8	-118	-	protein_coding	4.04439	3.75702	4.09761	3.9782	0.0707958	0.853121	NA	NA	NA	NA	NA	NA	NA	NA	NA	NA	NA	NA	NA	NA	NA	NA	NA	NA	NA	NA	NA	NA	NA	NA
890	common	chr12	53894513	53895144	4.26791	2.26814	520	159	4	53895052	53895074	GGCACGCTGGGATATGGAGTCC	2.45e-09	6	2	RP11-793H13.11	-108	-	antisense	2.98003	2.55827	2.51349	2.59455	-0.248685	0.74101	TARBP2	-123	+	protein_coding	4.75221	4.70874	5.19889	5.13668	0.306264	0.165665	NA	NA	NA	NA	NA	NA	NA	NA	NA	NA	NA	NA	NA	NA
891	common	chr19	12917049	12917504	4.09232	2.85449	602	202	2	12917286	12917308	GCCCTCCTGGGAATTGTAGTCC	8.38e-10	20	1	RNASEH2A	118	+	protein_coding	6.55152	6.40582	6.04898	6.10622	-0.417918	0.00373521	NA	NA	NA	NA	NA	NA	NA	NA	NA	NA	NA	NA	NA	NA	NA	NA	NA	NA	NA	NA	NA	NA	NA	NA
892	F80L absent	chr2	232650910	232651426	2.24389	1.11457	133	45	NA	NA	NA	NA	NA	NA	1	PDE6D	-186	-	protein_coding	4.20945	4.20789	4.37573	4.64904	0.307219	0.340206	NA	NA	NA	NA	NA	NA	NA	NA	NA	NA	NA	NA	NA	NA	NA	NA	NA	NA	NA	NA	NA	NA	NA	NA
893	F80L absent	chr16	25122789	25123072	2.72514	1.21483	49	20	2	25122853	25122875	TCCTTTCTGGGAAGCGTAGTCT	1.54e-07	15	2	RP11-449H11.1	-54	-	lincRNA	1.26903	1.04264	0.536053	1.37295	-0.153716	0.940985	LCMT1	120	+	protein_coding	4.50843	4.96301	4.54411	4.73823	-0.0876197	0.796407	NA	NA	NA	NA	NA	NA	NA	NA	NA	NA	NA	NA	NA	NA
894	common	chr19	49421970	49422379	4.87969	2.06123	411	109	4	49422176	49422198	CGGCTCCCAGGAGTGGTAGCGT	8.83e-05	6	1	NUCB1-AS1	-26	-	ND	ND	ND	ND	ND	ND	ND	NA	NA	NA	NA	NA	NA	NA	NA	NA	NA	NA	NA	NA	NA	NA	NA	NA	NA	NA	NA	NA	NA	NA	NA
895	common	chr5	40755861	40756304	4.91488	3.12977	944	262	4	40756094	40756116	GACCTTCTGGGATTTGTAGTAG	2.6e-07	20	1	TTC33	-5	-	protein_coding	4.83238	4.87431	5.85723	5.72547	0.803524	1.34075e-09	NA	NA	NA	NA	NA	NA	NA	NA	NA	NA	NA	NA	NA	NA	NA	NA	NA	NA	NA	NA	NA	NA	NA	NA
896	common	chr17	40950559	40951037	4.50664	2.43838	536	135	3	40950734	40950756	GCCTCGCTGGGAACAGTAGCCC	7.73e-06	11	2	COA3	-76	-	protein_coding	6.4614	6.47184	5.50303	5.77136	-0.838328	2.352e-06	CNTD1	12	+	ND	ND	ND	ND	ND	ND	ND	NA	NA	NA	NA	NA	NA	NA	NA	NA	NA	NA	NA	NA	NA
897	common	chr2	172290506	172290967	4.8001	2.46531	737	170	4	172290709	172290731	CGCCTGACGGGAATTGTAGTTC	6.3e-09	9	1	DCAF17	-9	+	protein_coding	3.52356	3.82069	3.853	3.85699	0.0983242	0.712911	NA	NA	NA	NA	NA	NA	NA	NA	NA	NA	NA	NA	NA	NA	NA	NA	NA	NA	NA	NA	NA	NA	NA	NA
898	common	chr3	169939714	169940122	3.727	2.20378	156	47	4	169939824	169939846	AGGATTCTGGGACTTGAGGTTC	3.48e-08	10	1	PRKCI	235	+	protein_coding	5.11936	5.36877	5.24375	5.10392	0.0172273	0.946708	NA	NA	NA	NA	NA	NA	NA	NA	NA	NA	NA	NA	NA	NA	NA	NA	NA	NA	NA	NA	NA	NA	NA	NA
899	F80L absent	chr21	32782587	32783022	2.64689	0.273711	48	13	NA	NA	NA	NA	NA	NA	0	NA	NA	NA	NA	NA	NA	NA	NA	NA	NA	NA	NA	NA	NA	NA	NA	NA	NA	NA	NA	NA	NA	NA	NA	NA	NA	NA	NA	NA	NA	NA	NA	NA	NA
900	common	chr18	43684108	43684454	3.31991	1.68323	161	43	2	43684248	43684270	GGATTTCTGGGAGTTGTGGTTT	6.3e-09	39	2	ATP5A1	19	-	protein_coding	8.9273	8.89527	8.93631	8.86709	-0.0361225	0.829322	HAUS1	17	+	protein_coding	5.81839	5.80581	5.66562	5.64789	-0.201759	0.259466	NA	NA	NA	NA	NA	NA	NA	NA	NA	NA	NA	NA	NA	NA
901	common	chr3	48282362	48282700	4.21581	2.33015	264	74	1	48282502	48282524	AGCCTGCCGGGAAGCGTAGTTC	1.02e-08	31	1	ZNF589	59	+	protein_coding	3.04963	3.23879	3.10266	3.27501	0.144827	0.655671	NA	NA	NA	NA	NA	NA	NA	NA	NA	NA	NA	NA	NA	NA	NA	NA	NA	NA	NA	NA	NA	NA	NA	NA
902	common	chr3	43147558	43147831	4.5088	1.83831	219	75	5	43147627	43147649	GGAATCCTGGGAGGTGTAGTTT	1.14e-09	25	1	POMGNT2	-126	-	protein_coding	3.59455	3.17313	3.38267	3.13422	-0.160557	0.716784	NA	NA	NA	NA	NA	NA	NA	NA	NA	NA	NA	NA	NA	NA	NA	NA	NA	NA	NA	NA	NA	NA	NA	NA
903	common	chr1	114354832	114355359	4.82501	2.40666	853	203	3	114355029	114355051	AACATGCCGGAAGCGGCCGTTC	0.000536	34	2	RP5-1073O3.2	-94	+	ND	ND	ND	ND	ND	ND	ND	RSBN1	3	-	protein_coding	3.64039	3.62761	4.2211	4.04614	0.224731	0.205047	NA	NA	NA	NA	NA	NA	NA	NA	NA	NA	NA	NA	NA	NA
904	F80L absent	chr14	66284195	66284884	2.57687	1.10506	82	23	6	66284432	66284454	GTGTGTATGGAATGTGTGGTGT	0.000547	18	0	NA	NA	NA	NA	NA	NA	NA	NA	NA	NA	NA	NA	NA	NA	NA	NA	NA	NA	NA	NA	NA	NA	NA	NA	NA	NA	NA	NA	NA	NA	NA	NA	NA	NA
905	common	chr1	95538124	95538546	3.87588	1.96418	190	63	5	95538259	95538281	TGCACTCTGGGGTTTGTAGTGA	2.24e-07	3	1	ALG14	166	-	protein_coding	2.95047	2.79909	4.07468	4.07553	1.14583	5.5229e-16	NA	NA	NA	NA	NA	NA	NA	NA	NA	NA	NA	NA	NA	NA	NA	NA	NA	NA	NA	NA	NA	NA	NA	NA
906	common	chr7	107384029	107384487	4.49638	2.30651	415	122	1	107384214	107384236	TGCCTTCTGGGACTTGTAGTGC	6.58e-10	8	1	CBLL1	-116	+	protein_coding	3.77716	3.66221	4.15381	4.27798	0.35875	0.0352386	NA	NA	NA	NA	NA	NA	NA	NA	NA	NA	NA	NA	NA	NA	NA	NA	NA	NA	NA	NA	NA	NA	NA	NA
907	F80L absent	chr17	17319449	17319999	2.21692	1.33477	48	21	NA	NA	NA	NA	NA	NA	0	NA	NA	NA	NA	NA	NA	NA	NA	NA	NA	NA	NA	NA	NA	NA	NA	NA	NA	NA	NA	NA	NA	NA	NA	NA	NA	NA	NA	NA	NA	NA	NA	NA	NA
908	common	chr9	131964855	131965705	5.54094	4.4125	2669	769	5	131965236	131965258	AGCATCATGGGAGTTGTAGTTC	2.11e-10	25	0	NA	NA	NA	NA	NA	NA	NA	NA	NA	NA	NA	NA	NA	NA	NA	NA	NA	NA	NA	NA	NA	NA	NA	NA	NA	NA	NA	NA	NA	NA	NA	NA	NA	NA
909	common	chr9	134406456	134407004	4.63806	2.79821	1675	457	2	134406678	134406700	GGCACGCCGGGAGTTGTAGTCC	2.53e-10	8	1	UCK1	-75	-	protein_coding	5.01257	4.81506	4.6837	4.62819	-0.31827	0.121374	NA	NA	NA	NA	NA	NA	NA	NA	NA	NA	NA	NA	NA	NA	NA	NA	NA	NA	NA	NA	NA	NA	NA	NA
910	common	chr11	72504946	72505399	4.29595	2.54747	340	98	5	72505130	72505152	TGCCACATGGGAACTGTAGTTC	3.75e-08	15	1	STARD10	-446	-	protein_coding	2.98914	2.90881	2.78869	2.98732	-0.153013	0.787252	NA	NA	NA	NA	NA	NA	NA	NA	NA	NA	NA	NA	NA	NA	NA	NA	NA	NA	NA	NA	NA	NA	NA	NA
911	F80L absent	chr9	137231248	137231659	1.55894	-0.320696	64	24	NA	NA	NA	NA	NA	NA	0	NA	NA	NA	NA	NA	NA	NA	NA	NA	NA	NA	NA	NA	NA	NA	NA	NA	NA	NA	NA	NA	NA	NA	NA	NA	NA	NA	NA	NA	NA	NA	NA	NA	NA
912	F80L absent	chr2	235591241	235591814	2.83384	1.31936	135	56	4	235591449	235591471	GGGATTCTGGGAAATGTAGTTC	6.78e-12	17	0	NA	NA	NA	NA	NA	NA	NA	NA	NA	NA	NA	NA	NA	NA	NA	NA	NA	NA	NA	NA	NA	NA	NA	NA	NA	NA	NA	NA	NA	NA	NA	NA	NA	NA
913	common	chr5	176778697	176779186	4.06634	2.05269	429	115	1	176778999	176779021	GGCATGCTGGAATTTGTAGTTT	2.68e-09	11	1	LMAN2	-88	-	protein_coding	6.57077	6.19338	6.24127	6.25229	-0.371388	0.190133	NA	NA	NA	NA	NA	NA	NA	NA	NA	NA	NA	NA	NA	NA	NA	NA	NA	NA	NA	NA	NA	NA	NA	NA
914	F80L absent	chr7	401336	401810	1.19884	-0.112329	137	57	8	401739	401761	AGGGAGTCGGGACAGGGAGGCT	0.000286	15	0	NA	NA	NA	NA	NA	NA	NA	NA	NA	NA	NA	NA	NA	NA	NA	NA	NA	NA	NA	NA	NA	NA	NA	NA	NA	NA	NA	NA	NA	NA	NA	NA	NA	NA
915	F80L absent	chr8	16564644	16565252	0.577838	0	3	2	NA	NA	NA	NA	NA	NA	0	NA	NA	NA	NA	NA	NA	NA	NA	NA	NA	NA	NA	NA	NA	NA	NA	NA	NA	NA	NA	NA	NA	NA	NA	NA	NA	NA	NA	NA	NA	NA	NA	NA	NA
916	F80L absent	chr2	9457174	9458053	2.25598	0.359542	81	32	NA	NA	NA	NA	NA	NA	0	NA	NA	NA	NA	NA	NA	NA	NA	NA	NA	NA	NA	NA	NA	NA	NA	NA	NA	NA	NA	NA	NA	NA	NA	NA	NA	NA	NA	NA	NA	NA	NA	NA	NA
917	F80L absent	chr17	76111666	76111944	-0.761018	-0.193733	26	32	NA	NA	NA	NA	NA	NA	0	NA	NA	NA	NA	NA	NA	NA	NA	NA	NA	NA	NA	NA	NA	NA	NA	NA	NA	NA	NA	NA	NA	NA	NA	NA	NA	NA	NA	NA	NA	NA	NA	NA	NA
918	common	chr19	48673457	48674026	4.81445	2.36313	830	250	6	48673669	48673691	AGGACACTGGGAGTCGTAGTCT	2.57e-08	2	2	LIG1	119	-	protein_coding	6.04067	6.07125	6.41447	6.61603	0.113517	0.703065	C19orf68	208	+	ND	ND	ND	ND	ND	ND	ND	NA	NA	NA	NA	NA	NA	NA	NA	NA	NA	NA	NA	NA	NA
919	F80L absent	chr22	49719249	49719531	2.37581	0.748033	43	12	NA	NA	NA	NA	NA	NA	0	NA	NA	NA	NA	NA	NA	NA	NA	NA	NA	NA	NA	NA	NA	NA	NA	NA	NA	NA	NA	NA	NA	NA	NA	NA	NA	NA	NA	NA	NA	NA	NA	NA	NA
920	F80L absent	chr12	124915752	124916525	2.08412	0.0493446	59	22	NA	NA	NA	NA	NA	NA	0	NA	NA	NA	NA	NA	NA	NA	NA	NA	NA	NA	NA	NA	NA	NA	NA	NA	NA	NA	NA	NA	NA	NA	NA	NA	NA	NA	NA	NA	NA	NA	NA	NA	NA
921	common	chr19	57078608	57078960	3.6788	1.8997	285	88	3	57078794	57078816	TAGCCCCTGGGAAGTGTAGTCC	8.27e-08	9	2	AC007228.11	-4	-	ND	ND	ND	ND	ND	ND	ND	ZNF470	96	+	ND	ND	ND	ND	ND	ND	ND	NA	NA	NA	NA	NA	NA	NA	NA	NA	NA	NA	NA	NA	NA
922	F80L absent	chr2	104994987	104995539	2.72313	1.72618	64	26	2	104995351	104995373	AGACTTCTGGGAAGTGTAGTTT	7.53e-10	10	0	NA	NA	NA	NA	NA	NA	NA	NA	NA	NA	NA	NA	NA	NA	NA	NA	NA	NA	NA	NA	NA	NA	NA	NA	NA	NA	NA	NA	NA	NA	NA	NA	NA	NA
923	F80L absent	chrX	40251639	40252258	2.39953	1.82742	74	30	1	40252024	40252046	TGAATTCTGGGAAATGTAGTTC	5.38e-11	33	0	NA	NA	NA	NA	NA	NA	NA	NA	NA	NA	NA	NA	NA	NA	NA	NA	NA	NA	NA	NA	NA	NA	NA	NA	NA	NA	NA	NA	NA	NA	NA	NA	NA	NA
924	F80L absent	chr20	52535617	52536059	2.36473	0.989422	142	54	6	52535849	52535871	AGCATTTTGGGAGGCCGAGGCA	3.91e-05	20	0	NA	NA	NA	NA	NA	NA	NA	NA	NA	NA	NA	NA	NA	NA	NA	NA	NA	NA	NA	NA	NA	NA	NA	NA	NA	NA	NA	NA	NA	NA	NA	NA	NA	NA
925	F80L absent	chr12	122185210	122186201	1.40632	-0.267091	133	54	NA	NA	NA	NA	NA	NA	0	NA	NA	NA	NA	NA	NA	NA	NA	NA	NA	NA	NA	NA	NA	NA	NA	NA	NA	NA	NA	NA	NA	NA	NA	NA	NA	NA	NA	NA	NA	NA	NA	NA	NA
926	F80L absent	chr19	50000512	50000827	2.84455	1.9245	77	43	5	50000674	50000696	GGGCTGCTGGGAATTGTAGTTG	2.23e-10	34	1	SNORD35B	308	+	ND	ND	ND	ND	ND	ND	ND	NA	NA	NA	NA	NA	NA	NA	NA	NA	NA	NA	NA	NA	NA	NA	NA	NA	NA	NA	NA	NA	NA	NA	NA
927	F80L absent	chr2	31246396	31246635	2.71989	0.63743	20	6	NA	NA	NA	NA	NA	NA	0	NA	NA	NA	NA	NA	NA	NA	NA	NA	NA	NA	NA	NA	NA	NA	NA	NA	NA	NA	NA	NA	NA	NA	NA	NA	NA	NA	NA	NA	NA	NA	NA	NA	NA
928	common	chr1	17338412	17338828	4.41828	2.67468	534	131	3	17338491	17338513	GGGCTGCCGGGACTTGTAGTCC	1.39e-09	14	1	ATP13A2	-197	-	protein_coding	4.50208	3.8748	3.75916	3.45549	-0.911571	0.0129167	NA	NA	NA	NA	NA	NA	NA	NA	NA	NA	NA	NA	NA	NA	NA	NA	NA	NA	NA	NA	NA	NA	NA	NA
929	common	chr19	45908404	45909105	4.5912	2.89547	813	261	2	45908742	45908764	AGGCTGCTGGGGGTTGTAGTCC	1.67e-09	7	0	NA	NA	NA	NA	NA	NA	NA	NA	NA	NA	NA	NA	NA	NA	NA	NA	NA	NA	NA	NA	NA	NA	NA	NA	NA	NA	NA	NA	NA	NA	NA	NA	NA	NA
930	common	chr11	73881879	73882325	4.19081	1.69919	205	62	4	73882040	73882062	AGCGTCCTGGGTATTGTAGTGT	8.27e-08	25	2	C2CD3	153	-	protein_coding	2.61824	2.95977	3.49313	3.64386	0.436351	0.0256622	PPME1	42	+	protein_coding	4.49378	4.3875	4.58015	4.7666	0.202633	0.265172	NA	NA	NA	NA	NA	NA	NA	NA	NA	NA	NA	NA	NA	NA
931	common	chr11	2421617	2422212	5.56966	3.18551	1037	303	4	2421887	2421909	TTCCTTGTGGGAGCTGTAGTTC	3.43e-08	14	1	TSSC4	-196	+	protein_coding	3.86295	3.08746	3.70929	2.96162	-0.443806	0.534756	NA	NA	NA	NA	NA	NA	NA	NA	NA	NA	NA	NA	NA	NA	NA	NA	NA	NA	NA	NA	NA	NA	NA	NA
932	common	chr19	49309810	49310275	4.04951	1.96451	354	115	2	49310025	49310047	GGCTTCATGGGAGTTGTAGTTT	1.3e-09	7	0	NA	NA	NA	NA	NA	NA	NA	NA	NA	NA	NA	NA	NA	NA	NA	NA	NA	NA	NA	NA	NA	NA	NA	NA	NA	NA	NA	NA	NA	NA	NA	NA	NA	NA
933	F80L absent	chr5	171929943	171930238	2.35215	2.32965	53	27	NA	NA	NA	NA	NA	NA	0	NA	NA	NA	NA	NA	NA	NA	NA	NA	NA	NA	NA	NA	NA	NA	NA	NA	NA	NA	NA	NA	NA	NA	NA	NA	NA	NA	NA	NA	NA	NA	NA	NA	NA
934	common	chr9	134153473	134153859	4.14873	2.16316	455	112	7	134153620	134153642	GGAATTCTGGGTAGTGTAGTTC	5e-09	1	0	NA	NA	NA	NA	NA	NA	NA	NA	NA	NA	NA	NA	NA	NA	NA	NA	NA	NA	NA	NA	NA	NA	NA	NA	NA	NA	NA	NA	NA	NA	NA	NA	NA	NA
935	F80L absent	chr2	10552517	10552996	2.53973	1.3112	58	22	NA	NA	NA	NA	NA	NA	0	NA	NA	NA	NA	NA	NA	NA	NA	NA	NA	NA	NA	NA	NA	NA	NA	NA	NA	NA	NA	NA	NA	NA	NA	NA	NA	NA	NA	NA	NA	NA	NA	NA	NA
936	common	chr5	137968683	137969000	2.32479	0.599398	138	38	5	137968798	137968820	AGCAGGCCGGGCGTGGTGGACT	8.43e-05	4	0	NA	NA	NA	NA	NA	NA	NA	NA	NA	NA	NA	NA	NA	NA	NA	NA	NA	NA	NA	NA	NA	NA	NA	NA	NA	NA	NA	NA	NA	NA	NA	NA	NA	NA
937	common	chr2	149632497	149632853	3.00928	1.17104	154	45	4	149632669	149632691	CGCATCCCGGGACTTGTAGTCA	7.9e-08	0	1	KIF5C	144	+	protein_coding	3.44626	3.34199	3.41007	3.28836	-0.0639711	0.806954	NA	NA	NA	NA	NA	NA	NA	NA	NA	NA	NA	NA	NA	NA	NA	NA	NA	NA	NA	NA	NA	NA	NA	NA
938	common	chr7	102105083	102105545	5.18141	2.85573	998	275	2	102105322	102105344	GGGCCGCTGGGAGTTGTAGTCC	8.94e-11	7	2	LRWD1	62	+	protein_coding	4.36387	3.86394	3.78346	3.43162	-0.465542	0.295705	ALKBH4	9	-	protein_coding	3.30743	3.01257	3.07724	2.81762	-0.144541	0.731957	NA	NA	NA	NA	NA	NA	NA	NA	NA	NA	NA	NA	NA	NA
939	F80L absent	chr2	3141794	3142265	1.56823	0.782547	33	12	NA	NA	NA	NA	NA	NA	0	NA	NA	NA	NA	NA	NA	NA	NA	NA	NA	NA	NA	NA	NA	NA	NA	NA	NA	NA	NA	NA	NA	NA	NA	NA	NA	NA	NA	NA	NA	NA	NA	NA	NA
940	common	chr16	68572896	68573457	4.44701	3.84714	575	176	2	68573116	68573138	GGGCCTCTGGGAAGTGTAGTTC	3.15e-10	8	0	NA	NA	NA	NA	NA	NA	NA	NA	NA	NA	NA	NA	NA	NA	NA	NA	NA	NA	NA	NA	NA	NA	NA	NA	NA	NA	NA	NA	NA	NA	NA	NA	NA	NA
941	common	chr10	92631494	92631949	3.70244	1.98306	198	53	5	92631661	92631683	GGCATGCTGGGAGCTGTAGTTA	8.54e-10	15	1	RPP30	-248	+	protein_coding	6.06889	6.15765	6.21665	6.22477	0.0291858	0.916759	NA	NA	NA	NA	NA	NA	NA	NA	NA	NA	NA	NA	NA	NA	NA	NA	NA	NA	NA	NA	NA	NA	NA	NA
942	common	chr1	150241324	150241697	4.04686	2.92475	306	93	3	150241508	150241530	GACCTGCTGGGAGTTGTAGTCG	1.03e-08	10	0	NA	NA	NA	NA	NA	NA	NA	NA	NA	NA	NA	NA	NA	NA	NA	NA	NA	NA	NA	NA	NA	NA	NA	NA	NA	NA	NA	NA	NA	NA	NA	NA	NA	NA
943	F80L absent	chrX	44510777	44511017	3.08595	1.54244	69	25	4	44510865	44510887	AGGAAACTGGGAAATGTAGTTT	2.21e-08	5	0	NA	NA	NA	NA	NA	NA	NA	NA	NA	NA	NA	NA	NA	NA	NA	NA	NA	NA	NA	NA	NA	NA	NA	NA	NA	NA	NA	NA	NA	NA	NA	NA	NA	NA
944	common	chr9	130548129	130548396	4.29562	2.43306	482	109	3	130548233	130548255	GGCCCCCTGGGACTTGTAGTTC	3.21e-10	4	2	MIR3960	-150	+	ND	ND	ND	ND	ND	ND	ND	CDK9	-304	+	protein_coding	3.93546	3.81967	3.87676	3.73118	-0.284846	0.343355	NA	NA	NA	NA	NA	NA	NA	NA	NA	NA	NA	NA	NA	NA
945	F80L absent	chr1	35177226	35177658	3.35584	1.39896	40	15	NA	NA	NA	NA	NA	NA	0	NA	NA	NA	NA	NA	NA	NA	NA	NA	NA	NA	NA	NA	NA	NA	NA	NA	NA	NA	NA	NA	NA	NA	NA	NA	NA	NA	NA	NA	NA	NA	NA	NA	NA
946	common	chr12	107167798	107168400	4.26907	2.22899	438	116	4	107167972	107167994	GGCATGCTGGGATTGGTAGTCA	7.7e-09	13	1	RIC8B	274	+	protein_coding	2.9279	3.20633	3.69488	3.79077	0.647941	0.000654065	NA	NA	NA	NA	NA	NA	NA	NA	NA	NA	NA	NA	NA	NA	NA	NA	NA	NA	NA	NA	NA	NA	NA	NA
947	common	chr9	133587854	133588276	3.55127	1.94672	526	147	7	133588069	133588091	TGCGTGCCGGGAGTTGTGGTCC	2.28e-08	5	0	NA	NA	NA	NA	NA	NA	NA	NA	NA	NA	NA	NA	NA	NA	NA	NA	NA	NA	NA	NA	NA	NA	NA	NA	NA	NA	NA	NA	NA	NA	NA	NA	NA	NA
948	F80L absent	chr21	46752406	46752733	2.18242	0.452649	57	19	NA	NA	NA	NA	NA	NA	0	NA	NA	NA	NA	NA	NA	NA	NA	NA	NA	NA	NA	NA	NA	NA	NA	NA	NA	NA	NA	NA	NA	NA	NA	NA	NA	NA	NA	NA	NA	NA	NA	NA	NA
949	common	chr19	55830908	55831590	4.00821	2.71118	795	254	4	55831340	55831362	GGCATGCTGGGAGTTGTAGTTC	9.55e-13	8	0	NA	NA	NA	NA	NA	NA	NA	NA	NA	NA	NA	NA	NA	NA	NA	NA	NA	NA	NA	NA	NA	NA	NA	NA	NA	NA	NA	NA	NA	NA	NA	NA	NA	NA
950	F80L absent	chr7	131861311	131861958	2.57358	0.214444	44	8	NA	NA	NA	NA	NA	NA	0	NA	NA	NA	NA	NA	NA	NA	NA	NA	NA	NA	NA	NA	NA	NA	NA	NA	NA	NA	NA	NA	NA	NA	NA	NA	NA	NA	NA	NA	NA	NA	NA	NA	NA
951	common	chr8	145159423	145160197	5.51483	3.45283	1764	537	5	145159801	145159823	GGCCTGCTGGGGGCTGTGGTTC	2.4e-08	9	1	MAF1	-408	+	protein_coding	6.13258	6.06393	6.16591	6.2182	-0.0555545	0.884898	NA	NA	NA	NA	NA	NA	NA	NA	NA	NA	NA	NA	NA	NA	NA	NA	NA	NA	NA	NA	NA	NA	NA	NA
952	common	chr4	7388002	7389685	2.05564	0.416416	128	39	3	7389084	7389106	TGTATGGTGGGCATGTGTGTGC	0.000776	26	0	NA	NA	NA	NA	NA	NA	NA	NA	NA	NA	NA	NA	NA	NA	NA	NA	NA	NA	NA	NA	NA	NA	NA	NA	NA	NA	NA	NA	NA	NA	NA	NA	NA	NA
953	F80L absent	chr14	99301820	99302317	2.37558	0.737736	52	20	1	99301914	99301936	GTGTGTGTGTGAGTGGGAGTGT	0.000983	18	0	NA	NA	NA	NA	NA	NA	NA	NA	NA	NA	NA	NA	NA	NA	NA	NA	NA	NA	NA	NA	NA	NA	NA	NA	NA	NA	NA	NA	NA	NA	NA	NA	NA	NA
954	F80L absent	chr14	95355693	95357112	1.99384	0.536289	126	47	NA	NA	NA	NA	NA	NA	0	NA	NA	NA	NA	NA	NA	NA	NA	NA	NA	NA	NA	NA	NA	NA	NA	NA	NA	NA	NA	NA	NA	NA	NA	NA	NA	NA	NA	NA	NA	NA	NA	NA	NA
955	common	chr6	33783772	33784099	3.27509	1.5959	164	55	2	33783857	33783879	GGGAGCCTGGGAAATGTAGTTT	1.81e-09	25	0	NA	NA	NA	NA	NA	NA	NA	NA	NA	NA	NA	NA	NA	NA	NA	NA	NA	NA	NA	NA	NA	NA	NA	NA	NA	NA	NA	NA	NA	NA	NA	NA	NA	NA
956	common	chr6	39902084	39902454	3.72989	2.38695	218	68	2	39902300	39902322	GGCCTTGTGGGAGCTGTAGTAC	1.29e-08	58	1	MOCS1	21	-	protein_coding	2.88947	2.77821	3.07211	3.0197	0.261715	0.278279	NA	NA	NA	NA	NA	NA	NA	NA	NA	NA	NA	NA	NA	NA	NA	NA	NA	NA	NA	NA	NA	NA	NA	NA
957	common	chr7	157632204	157632420	2.511	-0.284636	33	7	2	157632362	157632384	AGCTGTGTGGAATGTGTATGTG	0.000716	22	0	NA	NA	NA	NA	NA	NA	NA	NA	NA	NA	NA	NA	NA	NA	NA	NA	NA	NA	NA	NA	NA	NA	NA	NA	NA	NA	NA	NA	NA	NA	NA	NA	NA	NA
958	F80L absent	chr3	14361081	14361419	2.8797	1.43506	51	22	1	14361246	14361268	AGGAGCCTGGGAAATGTAGTCC	3e-09	3	0	NA	NA	NA	NA	NA	NA	NA	NA	NA	NA	NA	NA	NA	NA	NA	NA	NA	NA	NA	NA	NA	NA	NA	NA	NA	NA	NA	NA	NA	NA	NA	NA	NA	NA
959	common	chr19	59083994	59084973	3.99043	2.21815	591	194	2	59084486	59084508	AGCATCCTGGGAGACGTAGTCC	7.46e-10	16	2	MZF1	459	-	protein_coding	2.81147	2.80735	3.77294	3.61117	0.869664	2.46075e-07	RPL23AP79	387	+	ND	ND	ND	ND	ND	ND	ND	NA	NA	NA	NA	NA	NA	NA	NA	NA	NA	NA	NA	NA	NA
960	common	chr22	50623951	50624335	4.68763	2.87691	585	164	2	50624205	50624227	TACCCCCTGGGAAGTGTAGTCC	3.75e-08	21	1	TRABD	201	+	protein_coding	4.61648	3.55213	3.5656	2.91265	-0.93715	0.350019	NA	NA	NA	NA	NA	NA	NA	NA	NA	NA	NA	NA	NA	NA	NA	NA	NA	NA	NA	NA	NA	NA	NA	NA
961	F80L absent	chr14	99176733	99177041	2.92628	0.760226	28	14	NA	NA	NA	NA	NA	NA	0	NA	NA	NA	NA	NA	NA	NA	NA	NA	NA	NA	NA	NA	NA	NA	NA	NA	NA	NA	NA	NA	NA	NA	NA	NA	NA	NA	NA	NA	NA	NA	NA	NA	NA
962	common	chr16	83841366	83841684	4.27406	2.8942	252	80	3	83841540	83841562	GGCATTATGGGAGTAGTAGTTT	2.25e-09	13	2	RP11-483P21.2	-86	-	ND	ND	ND	ND	ND	ND	ND	HSBP1	-77	+	protein_coding	7.11353	7.18874	6.99695	6.80336	-0.260495	0.0326016	NA	NA	NA	NA	NA	NA	NA	NA	NA	NA	NA	NA	NA	NA
963	common	chr1	23694761	23695659	4.36217	3.30685	834	268	3	23695373	23695395	GCGCTGTTGGGAGATGTAGTGC	1.86e-07	13	1	C1orf213	280	+	protein_coding	1.03562	0.389567	0.948601	0.863938	0.250612	0.746566	NA	NA	NA	NA	NA	NA	NA	NA	NA	NA	NA	NA	NA	NA	NA	NA	NA	NA	NA	NA	NA	NA	NA	NA
964	common	chr7	100887782	100888375	4.83805	3.03816	736	240	6	100888109	100888131	AGGCTGCCGGGAGCCGTAGTTC	3.27e-08	14	0	NA	NA	NA	NA	NA	NA	NA	NA	NA	NA	NA	NA	NA	NA	NA	NA	NA	NA	NA	NA	NA	NA	NA	NA	NA	NA	NA	NA	NA	NA	NA	NA	NA	NA
965	common	chr6	163778015	163778298	4.07771	0.375081	62	19	1	163777926	163777948	GGTTTTGTGGGTGTGAGTGTGT	0.000747	79	0	NA	NA	NA	NA	NA	NA	NA	NA	NA	NA	NA	NA	NA	NA	NA	NA	NA	NA	NA	NA	NA	NA	NA	NA	NA	NA	NA	NA	NA	NA	NA	NA	NA	NA
966	common	chr19	59086585	59086865	4.67846	2.15391	274	72	2	59086715	59086737	GTACTGCCGGAAAATGTAGTTT	1.02e-06	14	0	NA	NA	NA	NA	NA	NA	NA	NA	NA	NA	NA	NA	NA	NA	NA	NA	NA	NA	NA	NA	NA	NA	NA	NA	NA	NA	NA	NA	NA	NA	NA	NA	NA	NA
967	common	chr15	85174418	85174789	4.5059	2.72202	308	100	2	85174629	85174651	CGGCCTCTGGGAAATGTAGTTC	1e-09	8	1	SCAND2P	79	+	pseudogene	2.12102	2.52857	3.0036	2.69153	0.395057	0.183456	NA	NA	NA	NA	NA	NA	NA	NA	NA	NA	NA	NA	NA	NA	NA	NA	NA	NA	NA	NA	NA	NA	NA	NA
968	F80L absent	chr1	1184388	1185027	0.52878	-0.176589	49	32	NA	NA	NA	NA	NA	NA	0	NA	NA	NA	NA	NA	NA	NA	NA	NA	NA	NA	NA	NA	NA	NA	NA	NA	NA	NA	NA	NA	NA	NA	NA	NA	NA	NA	NA	NA	NA	NA	NA	NA	NA
969	common	chr20	35724344	35724823	4.5437	2.39895	457	126	4	35724647	35724669	AGCCTGCTGGGAGGTGTAGTCC	1.35e-10	17	2	RBL1	-185	-	protein_coding	4.37156	4.78503	4.42358	4.7339	-0.122803	0.55298	RBL1	-395	+	protein_coding	4.37156	4.78503	4.42358	4.7339	-0.122803	0.55298	NA	NA	NA	NA	NA	NA	NA	NA	NA	NA	NA	NA	NA	NA
970	common	chr8	145550476	145550864	4.23505	2.5789	333	103	3	145550594	145550616	GGCACCCTGGGAGTCGTAGTCG	9.1e-09	4	1	DGAT1	-97	-	protein_coding	4.41414	3.85699	4.51349	4.06264	0.352354	0.34468	NA	NA	NA	NA	NA	NA	NA	NA	NA	NA	NA	NA	NA	NA	NA	NA	NA	NA	NA	NA	NA	NA	NA	NA
971	common	chr18	46986976	46987294	2.91074	1.85129	284	131	3	46987095	46987117	GGGCTTCTGGAAACTGTAGTCC	7.7e-09	20	0	NA	NA	NA	NA	NA	NA	NA	NA	NA	NA	NA	NA	NA	NA	NA	NA	NA	NA	NA	NA	NA	NA	NA	NA	NA	NA	NA	NA	NA	NA	NA	NA	NA	NA
972	common	chr19	58280717	58281075	4.40008	2.22556	220	74	4	58280906	58280928	CGGATTCTGGGTAATGTAGTTC	5.05e-09	10	1	ZNF586	127	+	protein_coding	2.37016	2.39506	1.73118	1.53605	-0.918211	0.00164606	NA	NA	NA	NA	NA	NA	NA	NA	NA	NA	NA	NA	NA	NA	NA	NA	NA	NA	NA	NA	NA	NA	NA	NA
973	F80L only	chr13	114771448	114773090	0.737516	-0.891364	106	21	NA	NA	NA	NA	NA	NA	0	NA	NA	NA	NA	NA	NA	NA	NA	NA	NA	NA	NA	NA	NA	NA	NA	NA	NA	NA	NA	NA	NA	NA	NA	NA	NA	NA	NA	NA	NA	NA	NA	NA	NA
974	F80L absent	chr14	98361729	98362170	2.30095	0.68971	42	14	NA	NA	NA	NA	NA	NA	0	NA	NA	NA	NA	NA	NA	NA	NA	NA	NA	NA	NA	NA	NA	NA	NA	NA	NA	NA	NA	NA	NA	NA	NA	NA	NA	NA	NA	NA	NA	NA	NA	NA	NA
975	common	chr16	67840325	67840986	5.13916	3.14456	861	273	5	67840527	67840549	GGGCCGCAGGGAAACCGAGTCC	1.26e-05	14	2	RANBP10	-100	-	protein_coding	1.64616	1.67807	1.51602	1.55582	-0.19602	0.592354	TSNAXIP1	13	+	ND	ND	ND	ND	ND	ND	ND	NA	NA	NA	NA	NA	NA	NA	NA	NA	NA	NA	NA	NA	NA
976	common	chr19	47049892	47050225	3.07404	0.764209	109	38	6	47049977	47049999	GGGAGGCTGGGAAATGTAGTCC	7.97e-10	21	0	NA	NA	NA	NA	NA	NA	NA	NA	NA	NA	NA	NA	NA	NA	NA	NA	NA	NA	NA	NA	NA	NA	NA	NA	NA	NA	NA	NA	NA	NA	NA	NA	NA	NA
977	common	chr19	41256915	41257204	3.07991	1.42108	140	37	2	41257071	41257093	AGCATCCTGGAAGTCGTAGTAA	1.71e-06	19	0	NA	NA	NA	NA	NA	NA	NA	NA	NA	NA	NA	NA	NA	NA	NA	NA	NA	NA	NA	NA	NA	NA	NA	NA	NA	NA	NA	NA	NA	NA	NA	NA	NA	NA
978	F80L absent	chr9	137639820	137640227	2.33953	0.614007	52	19	NA	NA	NA	NA	NA	NA	0	NA	NA	NA	NA	NA	NA	NA	NA	NA	NA	NA	NA	NA	NA	NA	NA	NA	NA	NA	NA	NA	NA	NA	NA	NA	NA	NA	NA	NA	NA	NA	NA	NA	NA
979	common	chr18	77439131	77439897	5.41621	3.87493	1729	545	7	77439501	77439523	TGAACGCTGGGACTCGTAGTCC	2.11e-08	9	2	RP11-567M16.3	231	-	ND	ND	ND	ND	ND	ND	ND	CTDP1	287	+	protein_coding	2.73985	1.80735	2.22033	1.74846	-0.378887	0.582014	NA	NA	NA	NA	NA	NA	NA	NA	NA	NA	NA	NA	NA	NA
980	F80L absent	chr15	70250741	70251238	3.15864	2.3659	102	31	3	70250976	70250998	TGGCTTTTAGGAAGAGATGGGC	0.000997	12	0	NA	NA	NA	NA	NA	NA	NA	NA	NA	NA	NA	NA	NA	NA	NA	NA	NA	NA	NA	NA	NA	NA	NA	NA	NA	NA	NA	NA	NA	NA	NA	NA	NA	NA
981	F80L absent	chr1	5868634	5869605	2.46376	0.923818	77	22	NA	NA	NA	NA	NA	NA	0	NA	NA	NA	NA	NA	NA	NA	NA	NA	NA	NA	NA	NA	NA	NA	NA	NA	NA	NA	NA	NA	NA	NA	NA	NA	NA	NA	NA	NA	NA	NA	NA	NA	NA
982	common	chr20	32890568	32891188	4.77977	3.46393	961	283	3	32890831	32890853	GGCATGCTGGGACTTGTAGTCC	2.36e-11	18	0	NA	NA	NA	NA	NA	NA	NA	NA	NA	NA	NA	NA	NA	NA	NA	NA	NA	NA	NA	NA	NA	NA	NA	NA	NA	NA	NA	NA	NA	NA	NA	NA	NA	NA
983	common	chr19	45829398	45829689	3.21323	1.42405	154	72	3	45829405	45829427	AGCACTCTGGGAGGCCGAGGTG	1.52e-05	1	0	NA	NA	NA	NA	NA	NA	NA	NA	NA	NA	NA	NA	NA	NA	NA	NA	NA	NA	NA	NA	NA	NA	NA	NA	NA	NA	NA	NA	NA	NA	NA	NA	NA	NA
984	common	chr1	33937964	33938511	4.37753	2.29094	441	129	3	33938188	33938210	GCCACCCTGGGAATGGAACGTC	2.05e-05	3	1	ZSCAN20	9	+	protein_coding	1.83996	1.8679	2.59455	2.54597	0.69597	0.000311446	NA	NA	NA	NA	NA	NA	NA	NA	NA	NA	NA	NA	NA	NA	NA	NA	NA	NA	NA	NA	NA	NA	NA	NA
985	common	chr16	67880403	67880973	5.25866	3.77092	902	277	4	67880711	67880733	AGCACGCCGGGAATTGTAGTTT	4.47e-10	23	1	NUTF2	-53	+	protein_coding	6.74228	6.87811	6.16993	6.57788	-0.412616	0.0907101	NA	NA	NA	NA	NA	NA	NA	NA	NA	NA	NA	NA	NA	NA	NA	NA	NA	NA	NA	NA	NA	NA	NA	NA
986	F80L absent	chr9	137260322	137260698	1.80884	-0.247048	69	23	NA	NA	NA	NA	NA	NA	0	NA	NA	NA	NA	NA	NA	NA	NA	NA	NA	NA	NA	NA	NA	NA	NA	NA	NA	NA	NA	NA	NA	NA	NA	NA	NA	NA	NA	NA	NA	NA	NA	NA	NA
987	common	chr8	67340943	67341266	5.03258	2.41415	201	62	4	67341051	67341073	TGCATCCTGGGAATCGTAGTCC	2.37e-10	37	2	RP11-346I3.4	108	-	ND	ND	ND	ND	ND	ND	ND	RRS1	159	+	protein_coding	4.15623	3.60644	3.87184	3.90977	-0.0368413	0.951344	NA	NA	NA	NA	NA	NA	NA	NA	NA	NA	NA	NA	NA	NA
988	F80L absent	chr7	102004105	102004577	2.05452	0.52333	98	38	4	102004451	102004473	AGGCGGGCGGGAGCTGTGCGGC	0.000319	96	2	PRKRIP1	-22	+	protein_coding	3.81352	3.61589	3.76341	3.81455	0.11432	0.725869	RP11-163E9.2	268	+	pseudogene	1.51602	1.74416	2.28688	2.15704	0.525772	0.575943	NA	NA	NA	NA	NA	NA	NA	NA	NA	NA	NA	NA	NA	NA
989	F80L absent	chr21	41992002	41992329	1.77208	0.302927	25	2	NA	NA	NA	NA	NA	NA	0	NA	NA	NA	NA	NA	NA	NA	NA	NA	NA	NA	NA	NA	NA	NA	NA	NA	NA	NA	NA	NA	NA	NA	NA	NA	NA	NA	NA	NA	NA	NA	NA	NA	NA
990	common	chr5	137673232	137673722	3.89534	2.33896	336	111	3	137673438	137673460	AGGCTGCTGGGAAGTGTGGTCC	4.93e-09	27	0	NA	NA	NA	NA	NA	NA	NA	NA	NA	NA	NA	NA	NA	NA	NA	NA	NA	NA	NA	NA	NA	NA	NA	NA	NA	NA	NA	NA	NA	NA	NA	NA	NA	NA
991	F80L absent	chr19	19250081	19250529	1.39888	-0.0400886	68	31	NA	NA	NA	NA	NA	NA	0	NA	NA	NA	NA	NA	NA	NA	NA	NA	NA	NA	NA	NA	NA	NA	NA	NA	NA	NA	NA	NA	NA	NA	NA	NA	NA	NA	NA	NA	NA	NA	NA	NA	NA
992	common	chr9	97021338	97021799	4.24724	2.43138	330	112	7	97021544	97021566	GGCAGTCTGGGTAGTGTAGTTC	1.41e-08	7	1	ZNF169	25	+	protein_coding	1.50589	1.41143	1.52105	1.58496	0.0750258	0.920581	NA	NA	NA	NA	NA	NA	NA	NA	NA	NA	NA	NA	NA	NA	NA	NA	NA	NA	NA	NA	NA	NA	NA	NA
993	F80L absent	chr4	56252220	56252582	2.43868	1.70595	54	18	NA	NA	NA	NA	NA	NA	0	NA	NA	NA	NA	NA	NA	NA	NA	NA	NA	NA	NA	NA	NA	NA	NA	NA	NA	NA	NA	NA	NA	NA	NA	NA	NA	NA	NA	NA	NA	NA	NA	NA	NA
994	common	chr9	131938143	131938562	4.55243	2.37551	329	111	3	131938309	131938331	GGCATGATGGGAAATGTAGTCC	6.84e-11	9	1	RP11-247A12.8	-266	+	ND	ND	ND	ND	ND	ND	ND	NA	NA	NA	NA	NA	NA	NA	NA	NA	NA	NA	NA	NA	NA	NA	NA	NA	NA	NA	NA	NA	NA	NA	NA
995	common	chr2	32288380	32288772	3.66814	1.41767	224	60	2	32288518	32288540	GGAAAGCCGAGAGGCGGGGGCC	0.000807	12	1	SPAST	104	+	protein_coding	4.07553	4.09255	4.30305	4.05658	0.0738554	0.782219	NA	NA	NA	NA	NA	NA	NA	NA	NA	NA	NA	NA	NA	NA	NA	NA	NA	NA	NA	NA	NA	NA	NA	NA
996	F80L absent	chr1	202316738	202317048	1.25124	0.400725	40	34	NA	NA	NA	NA	NA	NA	0	NA	NA	NA	NA	NA	NA	NA	NA	NA	NA	NA	NA	NA	NA	NA	NA	NA	NA	NA	NA	NA	NA	NA	NA	NA	NA	NA	NA	NA	NA	NA	NA	NA	NA
997	common	chr15	34630217	34630529	3.6083	1.57667	157	42	2	34630322	34630344	GGCACGACGGGAGCTGTAGTCC	1.5e-08	15	1	SLC12A6	-112	-	protein_coding	2.488	2.39506	2.41684	2.26303	-0.0435001	0.917047	NA	NA	NA	NA	NA	NA	NA	NA	NA	NA	NA	NA	NA	NA	NA	NA	NA	NA	NA	NA	NA	NA	NA	NA
998	common	chr17	73936917	73937455	4.56743	2.73763	810	264	6	73937217	73937239	GGCTCCCTGGGAGCTGTAGTTC	3e-09	24	1	FBF1	35	-	protein_coding	2.74201	2.52607	2.56803	2.46728	-0.314092	0.380896	NA	NA	NA	NA	NA	NA	NA	NA	NA	NA	NA	NA	NA	NA	NA	NA	NA	NA	NA	NA	NA	NA	NA	NA
999	F80L absent	chr17	72186372	72186642	3.52508	2.3317	40	21	2	72186503	72186525	AGAGTGCTGGGATATGTAGTTT	1.39e-08	8	0	NA	NA	NA	NA	NA	NA	NA	NA	NA	NA	NA	NA	NA	NA	NA	NA	NA	NA	NA	NA	NA	NA	NA	NA	NA	NA	NA	NA	NA	NA	NA	NA	NA	NA
1000	common	chr19	1905041	1905520	4.8983	3.35302	1033	361	4	1905261	1905283	TGCCTACTAGCAATTGTAGTCC	3.49e-06	8	2	SCAMP4	-67	+	protein_coding	2.96347	2.59216	3.26903	2.97636	0.0510204	0.926286	ADAT3	97	+	ND	ND	ND	ND	ND	ND	ND	NA	NA	NA	NA	NA	NA	NA	NA	NA	NA	NA	NA	NA	NA
1001	common	chr19	44645542	44645928	3.75568	1.8042	224	76	6	44645676	44645698	GGAATTCTGGGAAATGTAGTCC	3.69e-11	20	1	ZNF234	-25	+	protein_coding	3.37156	3.48285	3.67129	3.61589	0.140501	0.614654	NA	NA	NA	NA	NA	NA	NA	NA	NA	NA	NA	NA	NA	NA	NA	NA	NA	NA	NA	NA	NA	NA	NA	NA
1002	common	chr10	126149921	126150477	3.54289	2.09097	747	261	2	126150342	126150364	GGGCGCCTGGGAACTGTAGTCC	8.31e-09	16	1	LHPP	204	+	protein_coding	2.45418	2.35332	2.05658	1.63691	-0.594166	0.282686	NA	NA	NA	NA	NA	NA	NA	NA	NA	NA	NA	NA	NA	NA	NA	NA	NA	NA	NA	NA	NA	NA	NA	NA
1003	common	chr1	156308363	156308926	3.75115	2.05172	380	167	5	156308560	156308582	GGTGAAGTGGGAGTTGTAGTCT	2.16e-06	18	0	NA	NA	NA	NA	NA	NA	NA	NA	NA	NA	NA	NA	NA	NA	NA	NA	NA	NA	NA	NA	NA	NA	NA	NA	NA	NA	NA	NA	NA	NA	NA	NA	NA	NA
1004	F80L absent	chr9	134461864	134462594	1.29707	0.375949	77	45	2	134462106	134462128	GTGTGTGTGTGAGACGGAGTCT	0.000414	150	0	NA	NA	NA	NA	NA	NA	NA	NA	NA	NA	NA	NA	NA	NA	NA	NA	NA	NA	NA	NA	NA	NA	NA	NA	NA	NA	NA	NA	NA	NA	NA	NA	NA	NA
1005	F80L absent	chr10	69598173	69598529	1.40535	0.351999	88	38	2	69598512	69598534	AGCACGTTGGGAGGCCGAAGCA	0.000502	150	1	DNAJC12	-427	-	protein_coding	5.28651	5.24982	5.05615	4.93687	-0.323295	0.0729482	NA	NA	NA	NA	NA	NA	NA	NA	NA	NA	NA	NA	NA	NA	NA	NA	NA	NA	NA	NA	NA	NA	NA	NA
1006	common	chr19	35224601	35225207	4.42465	2.6007	382	146	7	35225096	35225118	ATGATTCTGGGAAATGTCGATC	2.25e-06	21	1	ZNF181	156	+	protein_coding	3.06867	2.91456	3.50335	3.28096	0.389424	0.104099	NA	NA	NA	NA	NA	NA	NA	NA	NA	NA	NA	NA	NA	NA	NA	NA	NA	NA	NA	NA	NA	NA	NA	NA
1007	F80L absent	chr19	13507475	13507864	2.66018	1.73259	65	29	NA	NA	NA	NA	NA	NA	0	NA	NA	NA	NA	NA	NA	NA	NA	NA	NA	NA	NA	NA	NA	NA	NA	NA	NA	NA	NA	NA	NA	NA	NA	NA	NA	NA	NA	NA	NA	NA	NA	NA	NA
1008	F80L absent	chr16	73320363	73321783	1.87542	0.711576	148	50	NA	NA	NA	NA	NA	NA	0	NA	NA	NA	NA	NA	NA	NA	NA	NA	NA	NA	NA	NA	NA	NA	NA	NA	NA	NA	NA	NA	NA	NA	NA	NA	NA	NA	NA	NA	NA	NA	NA	NA	NA
1009	common	chr19	36239088	36239474	3.99973	2.91298	266	78	4	36239219	36239241	GGCACGGTGGGAAACAAAGGAT	5.69e-05	24	1	LIN37	-19	+	protein_coding	2.08746	1.87971	2.64155	2.72247	0.637901	0.191096	NA	NA	NA	NA	NA	NA	NA	NA	NA	NA	NA	NA	NA	NA	NA	NA	NA	NA	NA	NA	NA	NA	NA	NA
1010	F80L absent	chr14	104938022	104938426	2.25923	1.04483	68	27	2	104938359	104938381	TGATGTGTGGGGAATGGGGATG	0.000603	16	0	NA	NA	NA	NA	NA	NA	NA	NA	NA	NA	NA	NA	NA	NA	NA	NA	NA	NA	NA	NA	NA	NA	NA	NA	NA	NA	NA	NA	NA	NA	NA	NA	NA	NA
1011	F80L absent	chr15	30241607	30241898	1.2115	0	71	28	NA	NA	NA	NA	NA	NA	0	NA	NA	NA	NA	NA	NA	NA	NA	NA	NA	NA	NA	NA	NA	NA	NA	NA	NA	NA	NA	NA	NA	NA	NA	NA	NA	NA	NA	NA	NA	NA	NA	NA	NA
1012	common	chr9	138853175	138853655	5.80846	4.21964	1890	681	2	138853258	138853280	CGCATGCCGGGAGATGTGGTTC	1.75e-08	33	1	UBAC1	-189	-	protein_coding	6.08491	5.79129	6.26772	6.23821	0.272444	0.187235	NA	NA	NA	NA	NA	NA	NA	NA	NA	NA	NA	NA	NA	NA	NA	NA	NA	NA	NA	NA	NA	NA	NA	NA
1013	common	chr12	110151076	110151604	5.36216	3.41787	747	265	3	110151373	110151395	AGCATGCCGGGAGTTGCAGTCC	9e-09	3	0	NA	NA	NA	NA	NA	NA	NA	NA	NA	NA	NA	NA	NA	NA	NA	NA	NA	NA	NA	NA	NA	NA	NA	NA	NA	NA	NA	NA	NA	NA	NA	NA	NA	NA
1014	F80L absent	chr12	56509703	56510432	2.38527	0.739305	151	75	3	56510088	56510110	TGCTTCTTGGGAGTTGCAGTTC	9.01e-08	189	1	RPL41	303	+	protein_coding	11.4995	11.7035	11.4607	11.7502	-0.0106171	0.979187	NA	NA	NA	NA	NA	NA	NA	NA	NA	NA	NA	NA	NA	NA	NA	NA	NA	NA	NA	NA	NA	NA	NA	NA
1015	common	chr19	55690246	55690812	4.75831	2.53209	662	218	5	55690568	55690590	GTCATGCTGGGAGTTGTAGTAT	1.38e-08	31	0	NA	NA	NA	NA	NA	NA	NA	NA	NA	NA	NA	NA	NA	NA	NA	NA	NA	NA	NA	NA	NA	NA	NA	NA	NA	NA	NA	NA	NA	NA	NA	NA	NA	NA
1016	common	chr1	156716309	156716722	4.98754	2.7893	381	142	1	156716522	156716544	GTGCTGCTGGGAGTTGTAGTCC	1.84e-09	4	0	NA	NA	NA	NA	NA	NA	NA	NA	NA	NA	NA	NA	NA	NA	NA	NA	NA	NA	NA	NA	NA	NA	NA	NA	NA	NA	NA	NA	NA	NA	NA	NA	NA	NA
1017	common	chr4	169931351	169931640	3.49669	2.4021	154	60	3	169931548	169931570	TGCTTGCTGGGACCTGTAGTCT	5.26e-09	6	2	CBR4	-69	-	protein_coding	4.1416	4.1152	3.91552	3.77294	-0.32174	0.0425953	RP11-483A20.3	86	+	ND	ND	ND	ND	ND	ND	ND	NA	NA	NA	NA	NA	NA	NA	NA	NA	NA	NA	NA	NA	NA
1018	F80L absent	chr19	51275558	51275844	2.29477	0.824237	75	27	4	51275733	51275755	GGGAGGCCAGGTGCTGTGGCTC	0.000238	24	0	NA	NA	NA	NA	NA	NA	NA	NA	NA	NA	NA	NA	NA	NA	NA	NA	NA	NA	NA	NA	NA	NA	NA	NA	NA	NA	NA	NA	NA	NA	NA	NA	NA	NA
1019	common	chr6	43214777	43215480	5.12728	3.48796	973	330	4	43215022	43215044	GGCACGCCGGGAGATGGAGTCT	7.29e-09	20	0	NA	NA	NA	NA	NA	NA	NA	NA	NA	NA	NA	NA	NA	NA	NA	NA	NA	NA	NA	NA	NA	NA	NA	NA	NA	NA	NA	NA	NA	NA	NA	NA	NA	NA
1020	F80L absent	chr2	233764292	233765320	2.01995	0.028406	72	41	NA	NA	NA	NA	NA	NA	0	NA	NA	NA	NA	NA	NA	NA	NA	NA	NA	NA	NA	NA	NA	NA	NA	NA	NA	NA	NA	NA	NA	NA	NA	NA	NA	NA	NA	NA	NA	NA	NA	NA	NA
1021	common	chr7	36406697	36407230	4.78564	3.42136	666	234	6	36406947	36406969	TGCACGCCGGGAGTTGTAGTTC	3.42e-10	26	0	NA	NA	NA	NA	NA	NA	NA	NA	NA	NA	NA	NA	NA	NA	NA	NA	NA	NA	NA	NA	NA	NA	NA	NA	NA	NA	NA	NA	NA	NA	NA	NA	NA	NA
1022	common	chr17	3539611	3540188	4.09079	2.62526	655	252	3	3539937	3539959	TGAGCTCTGGGAGTTGTAGTTT	4.74e-09	26	3	SHPK	-356	-	protein_coding	3.58616	3.29866	3.58496	3.42492	0.0325803	0.936717	SHPK	-283	-	protein_coding	3.58616	3.29866	3.58496	3.42492	0.0325803	0.936717	CTNS	-137	+	protein_coding	3.21412	3.2032	3.26903	3.33485	-0.0433145	0.922298	NA	NA	NA	NA
1023	F80L absent	chr6	3777084	3777511	1.56598	0.479724	38	24	NA	NA	NA	NA	NA	NA	0	NA	NA	NA	NA	NA	NA	NA	NA	NA	NA	NA	NA	NA	NA	NA	NA	NA	NA	NA	NA	NA	NA	NA	NA	NA	NA	NA	NA	NA	NA	NA	NA	NA	NA
1024	common	chr2	27303977	27304382	3.73438	2.66318	223	85	3	27304258	27304280	TGCATGCTGGGACCTGCGGTCT	2.83e-07	11	0	NA	NA	NA	NA	NA	NA	NA	NA	NA	NA	NA	NA	NA	NA	NA	NA	NA	NA	NA	NA	NA	NA	NA	NA	NA	NA	NA	NA	NA	NA	NA	NA	NA	NA
1025	common	chr20	25677139	25677762	4.9585	3.51679	934	317	6	25677530	25677552	AGGATGCTGGGTAGCGTAGTCC	5.18e-08	13	1	ZNF337	27	-	protein_coding	3.34483	3.488	3.87676	3.89239	0.435136	0.0244213	NA	NA	NA	NA	NA	NA	NA	NA	NA	NA	NA	NA	NA	NA	NA	NA	NA	NA	NA	NA	NA	NA	NA	NA
1026	common	chr15	70572159	70572705	2.97522	0.0601963	69	19	NA	NA	NA	NA	NA	NA	0	NA	NA	NA	NA	NA	NA	NA	NA	NA	NA	NA	NA	NA	NA	NA	NA	NA	NA	NA	NA	NA	NA	NA	NA	NA	NA	NA	NA	NA	NA	NA	NA	NA	NA
1027	common	chr16	69419819	69420303	3.50331	1.95646	379	111	6	69419902	69419924	GGGCTTCTGGGAGGGAAAGGAC	3.07e-05	35	0	NA	NA	NA	NA	NA	NA	NA	NA	NA	NA	NA	NA	NA	NA	NA	NA	NA	NA	NA	NA	NA	NA	NA	NA	NA	NA	NA	NA	NA	NA	NA	NA	NA	NA
1028	common	chr16	67260733	67261158	3.84741	2.02855	201	58	3	67260934	67260956	GGCTTTCTGGGAAATGTAGTCT	5.27e-11	2	3	AC040160.1	-15	-	ND	ND	ND	ND	ND	ND	ND	LRRC29	6	-	ND	ND	ND	ND	ND	ND	ND	TMEM208	61	+	protein_coding	4.44956	4.26903	3.80219	3.54226	-0.692735	0.0102773	NA	NA	NA	NA
1029	common	chr19	37958073	37958560	4.06762	2.81519	362	128	3	37958349	37958371	AGGCCTCTGGGAAATGTAGTTC	1.35e-10	70	1	ZNF570	171	+	protein_coding	1.46467	1.45943	1.07724	0.970854	-0.445746	0.433359	NA	NA	NA	NA	NA	NA	NA	NA	NA	NA	NA	NA	NA	NA	NA	NA	NA	NA	NA	NA	NA	NA	NA	NA
1030	common	chr6	10147146	10147500	5.15359	4.31276	194	67	2	10147341	10147363	TGCTTCCTGGGAAATGGAGTTT	3.53e-09	6	0	NA	NA	NA	NA	NA	NA	NA	NA	NA	NA	NA	NA	NA	NA	NA	NA	NA	NA	NA	NA	NA	NA	NA	NA	NA	NA	NA	NA	NA	NA	NA	NA	NA	NA
1031	common	chr16	2802051	2802691	3.8323	2.54578	441	177	3	2802315	2802337	AGCATTCTGGGAGTTGTGGTTC	1.22e-10	12	2	SRRM2	-41	+	protein_coding	4.67412	5.68874	5.1375	5.86022	0.139785	0.918411	SRRM2-AS1	230	-	antisense	-0.0740006	0.722466	1.7866	2.08066	1.4203	0.000925831	NA	NA	NA	NA	NA	NA	NA	NA	NA	NA	NA	NA	NA	NA
1032	common	chr12	57145971	57146478	5.44119	3.11742	737	282	2	57146212	57146234	GGGCCGCCGGGAATTGTAGTTC	6.16e-10	3	2	PRIM1	-67	-	protein_coding	5.47314	5.60051	4.76924	4.86245	-0.802115	3.5e-08	HSD17B6	-279	+	protein_coding	2.42761	2.10434	2.52356	2.54597	0.268023	0.626441	NA	NA	NA	NA	NA	NA	NA	NA	NA	NA	NA	NA	NA	NA
1033	common	chr12	133532682	133533130	5.71321	3.99374	1018	306	2	133532885	133532907	GGGACGCTGGGAAATGTAGTTC	6.58e-11	2	2	CHFR	-16	-	protein_coding	2.92979	2.65992	3.02857	3.27053	0.15967	0.771161	ZNF605	-14	-	protein_coding	2.27202	2.29278	2.9855	3.04264	0.824125	1.23629e-07	NA	NA	NA	NA	NA	NA	NA	NA	NA	NA	NA	NA	NA	NA
1034	common	chr20	18268706	18269355	5.10347	3.24607	492	188	5	18269160	18269182	AGGATTCGGGGTAGTGTAGTCC	2.7e-07	14	1	ZNF133	91	+	protein_coding	2.22651	2.07382	1.93734	2.10769	-0.138097	0.771161	NA	NA	NA	NA	NA	NA	NA	NA	NA	NA	NA	NA	NA	NA	NA	NA	NA	NA	NA	NA	NA	NA	NA	NA
1035	F80L absent	chr14	62221931	62222198	1.69546	0.626185	6	3	NA	NA	NA	NA	NA	NA	0	NA	NA	NA	NA	NA	NA	NA	NA	NA	NA	NA	NA	NA	NA	NA	NA	NA	NA	NA	NA	NA	NA	NA	NA	NA	NA	NA	NA	NA	NA	NA	NA	NA	NA
1036	common	chr3	67048341	67048823	4.195	2.91306	395	137	2	67048586	67048608	TGCGTGTCGGGAAATGTAGTTT	2.92e-08	71	1	KBTBD8	145	+	protein_coding	2.5435	2.7866	3.20477	2.97269	0.424976	0.0386489	NA	NA	NA	NA	NA	NA	NA	NA	NA	NA	NA	NA	NA	NA	NA	NA	NA	NA	NA	NA	NA	NA	NA	NA
1037	common	chr3	69788228	69788705	5.01888	4.25985	1058	355	3	69788529	69788551	CGCCGCCTGGGATCTGTAGTTC	9.5e-08	7	1	MITF	120	+	protein_coding	1.43829	1.67356	1.42223	1.5509	-0.154249	0.725	NA	NA	NA	NA	NA	NA	NA	NA	NA	NA	NA	NA	NA	NA	NA	NA	NA	NA	NA	NA	NA	NA	NA	NA
1038	common	chr19	47942106	47942426	4.05617	1.4811	150	56	2	47942227	47942249	GGGAGGCTGGGAAATGTAGTTC	6.58e-10	6	0	NA	NA	NA	NA	NA	NA	NA	NA	NA	NA	NA	NA	NA	NA	NA	NA	NA	NA	NA	NA	NA	NA	NA	NA	NA	NA	NA	NA	NA	NA	NA	NA	NA	NA
1039	common	chr6	41703285	41703779	5.38162	3.05908	660	253	4	41703411	41703433	CGCCCACTGGGAAGCGTAGTTC	1.54e-07	7	1	TFEB	465	-	ND	ND	ND	ND	ND	ND	ND	NA	NA	NA	NA	NA	NA	NA	NA	NA	NA	NA	NA	NA	NA	NA	NA	NA	NA	NA	NA	NA	NA	NA	NA
1040	common	chr1	12040041	12040561	4.54112	2.69246	605	203	1	12040223	12040245	TGCATCATGGGGGCTGTAGTTC	2.82e-08	25	1	MFN2	-63	+	protein_coding	5.12639	4.91025	5.29425	5.2407	0.172008	0.355165	NA	NA	NA	NA	NA	NA	NA	NA	NA	NA	NA	NA	NA	NA	NA	NA	NA	NA	NA	NA	NA	NA	NA	NA
1041	common	chr15	78370030	78370392	4.70895	3.13082	379	107	4	78370108	78370130	AGCACCCTGGGACTTGTAGTCT	8.26e-10	24	2	TBC1D2B	-145	-	protein_coding	3.852	3.76235	4.29205	4.15704	0.211622	0.281484	SH2D7	-61	+	ND	ND	ND	ND	ND	ND	ND	NA	NA	NA	NA	NA	NA	NA	NA	NA	NA	NA	NA	NA	NA
1042	F80L absent	chr22	33299734	33300387	2.11126	0.965844	39	16	NA	NA	NA	NA	NA	NA	0	NA	NA	NA	NA	NA	NA	NA	NA	NA	NA	NA	NA	NA	NA	NA	NA	NA	NA	NA	NA	NA	NA	NA	NA	NA	NA	NA	NA	NA	NA	NA	NA	NA	NA
1043	F80L absent	chr10	48330841	48331637	2.54414	1.02379	161	55	NA	NA	NA	NA	NA	NA	0	NA	NA	NA	NA	NA	NA	NA	NA	NA	NA	NA	NA	NA	NA	NA	NA	NA	NA	NA	NA	NA	NA	NA	NA	NA	NA	NA	NA	NA	NA	NA	NA	NA	NA
1044	common	chr16	53468085	53468534	4.37816	3.00514	401	136	3	53468322	53468344	CGCCTGCAGGCACCCGTAGTCT	0.000161	4	1	RBL2	-420	+	protein_coding	4.85499	4.97407	4.86592	4.5735	-0.277424	0.110836	NA	NA	NA	NA	NA	NA	NA	NA	NA	NA	NA	NA	NA	NA	NA	NA	NA	NA	NA	NA	NA	NA	NA	NA
1045	common	chr3	98241642	98242142	4.53429	4.23895	505	184	4	98241856	98241878	GGCCTTGTGGGAGTTGTAGGAG	2.06e-07	9	2	RP11-227H4.5	-478	+	ND	ND	ND	ND	ND	ND	ND	CLDND1	18	-	protein_coding	5.28059	5.38163	5.62615	5.56621	0.217476	0.192863	NA	NA	NA	NA	NA	NA	NA	NA	NA	NA	NA	NA	NA	NA
1046	common	chr19	36249014	36249702	3.49943	1.65429	399	147	3	36249243	36249265	AGCATGTTGGGAATTGTAGTTC	1.24e-10	87	2	HSPB6	-378	-	ND	ND	ND	ND	ND	ND	ND	C19orf55	-314	+	protein_coding	1.96347	2.20163	1.80323	2.09424	-0.0373823	0.958448	NA	NA	NA	NA	NA	NA	NA	NA	NA	NA	NA	NA	NA	NA
1047	common	chr22	17640119	17640661	4.06899	3.17392	606	197	2	17640231	17640253	GGCATCACGGGAGTTGTAGTCC	1.27e-09	33	1	CECR5-AS1	-116	+	ND	ND	ND	ND	ND	ND	ND	NA	NA	NA	NA	NA	NA	NA	NA	NA	NA	NA	NA	NA	NA	NA	NA	NA	NA	NA	NA	NA	NA	NA	NA
1048	F80L absent	chr1	53564991	53565515	2.34981	1.03505	47	26	NA	NA	NA	NA	NA	NA	0	NA	NA	NA	NA	NA	NA	NA	NA	NA	NA	NA	NA	NA	NA	NA	NA	NA	NA	NA	NA	NA	NA	NA	NA	NA	NA	NA	NA	NA	NA	NA	NA	NA	NA
1049	F80L absent	chr10	77716523	77716755	2.54841	1.7266	23	12	NA	NA	NA	NA	NA	NA	0	NA	NA	NA	NA	NA	NA	NA	NA	NA	NA	NA	NA	NA	NA	NA	NA	NA	NA	NA	NA	NA	NA	NA	NA	NA	NA	NA	NA	NA	NA	NA	NA	NA	NA
1050	common	chr2	172543707	172544075	4.34572	2.51806	173	69	6	172543911	172543933	TGCGTTCTGGGAATTGTGGTCG	1.7e-08	8	1	DYNC1I2	28	+	protein_coding	5.8632	5.7137	6.04614	6.03276	0.226638	0.103471	NA	NA	NA	NA	NA	NA	NA	NA	NA	NA	NA	NA	NA	NA	NA	NA	NA	NA	NA	NA	NA	NA	NA	NA
1051	common	chr7	1465005	1465567	3.4146	2.2185	289	109	4	1465370	1465392	GGGATGCTGGGGAATGTAGTTC	6.63e-10	15	0	NA	NA	NA	NA	NA	NA	NA	NA	NA	NA	NA	NA	NA	NA	NA	NA	NA	NA	NA	NA	NA	NA	NA	NA	NA	NA	NA	NA	NA	NA	NA	NA	NA	NA
1052	F80L absent	chr9	138729346	138730499	1.90419	0.419026	114	44	NA	NA	NA	NA	NA	NA	0	NA	NA	NA	NA	NA	NA	NA	NA	NA	NA	NA	NA	NA	NA	NA	NA	NA	NA	NA	NA	NA	NA	NA	NA	NA	NA	NA	NA	NA	NA	NA	NA	NA	NA
1053	common	chr5	149736949	149737378	4.20643	2.76034	592	201	4	149737166	149737188	GGCGCGCCGGGAAACGTAGTCC	4.78e-08	16	1	TCOF1	39	+	protein_coding	5.9514	5.62498	5.73606	5.91361	-0.0832137	0.784072	NA	NA	NA	NA	NA	NA	NA	NA	NA	NA	NA	NA	NA	NA	NA	NA	NA	NA	NA	NA	NA	NA	NA	NA
1054	common	chr11	65819410	65819901	4.33942	2.67827	702	225	4	65819627	65819649	GGCCTCCTGGGAGTTGTAGTGC	2.26e-10	11	0	NA	NA	NA	NA	NA	NA	NA	NA	NA	NA	NA	NA	NA	NA	NA	NA	NA	NA	NA	NA	NA	NA	NA	NA	NA	NA	NA	NA	NA	NA	NA	NA	NA	NA
1055	common	chr19	54382426	54382980	5.01097	3.15736	1044	383	3	54382753	54382775	TGCATTCTGGGACTGGTAGTCC	7.4e-10	26	1	PRKCG	-259	+	ND	ND	ND	ND	ND	ND	ND	NA	NA	NA	NA	NA	NA	NA	NA	NA	NA	NA	NA	NA	NA	NA	NA	NA	NA	NA	NA	NA	NA	NA	NA
1056	common	chr17	17494762	17495465	4.95287	3.53124	1295	479	3	17495065	17495087	GGCCTTCTGGGAAATGTAGTTC	1.54e-12	6	2	PEMT	-91	-	protein_coding	4.44162	3.78555	2.42492	2.42761	-1.78864	2.67e-07	RP11-524F11.2	-371	+	ND	ND	ND	ND	ND	ND	ND	NA	NA	NA	NA	NA	NA	NA	NA	NA	NA	NA	NA	NA	NA
1057	F80L absent	chr10	82417971	82418298	1.59402	0.0454001	67	29	NA	NA	NA	NA	NA	NA	0	NA	NA	NA	NA	NA	NA	NA	NA	NA	NA	NA	NA	NA	NA	NA	NA	NA	NA	NA	NA	NA	NA	NA	NA	NA	NA	NA	NA	NA	NA	NA	NA	NA	NA
1058	common	chr21	35747551	35748141	4.15316	2.24536	633	226	6	35747805	35747827	AGGACGGTAGAAGTCGTGGTTT	5.41e-05	10	2	AP000320.6	-199	-	ND	ND	ND	ND	ND	ND	ND	SMIM11	-67	+	protein_coding	5.0955	5.29682	5.96878	6.03298	0.776386	1.77237e-06	NA	NA	NA	NA	NA	NA	NA	NA	NA	NA	NA	NA	NA	NA
1059	F80L absent	chr1	1302414	1302870	2.65169	1.13311	43	23	NA	NA	NA	NA	NA	NA	0	NA	NA	NA	NA	NA	NA	NA	NA	NA	NA	NA	NA	NA	NA	NA	NA	NA	NA	NA	NA	NA	NA	NA	NA	NA	NA	NA	NA	NA	NA	NA	NA	NA	NA
1060	F80L absent	chr16	58270322	58270942	2.82691	1.92014	123	40	2	58270494	58270516	AGGAGCCTGGGAAATGGAGTCC	2.66e-08	10	0	NA	NA	NA	NA	NA	NA	NA	NA	NA	NA	NA	NA	NA	NA	NA	NA	NA	NA	NA	NA	NA	NA	NA	NA	NA	NA	NA	NA	NA	NA	NA	NA	NA	NA
1061	F80L absent	chr2	2753554	2754050	2.73252	0.415439	48	31	1	2753904	2753926	GGGGTGGTGGTGTGTGTGGGGT	0.000912	150	0	NA	NA	NA	NA	NA	NA	NA	NA	NA	NA	NA	NA	NA	NA	NA	NA	NA	NA	NA	NA	NA	NA	NA	NA	NA	NA	NA	NA	NA	NA	NA	NA	NA	NA
1062	F80L absent	chr19	14032441	14033145	2.042	0.57371	162	60	4	14032602	14032624	AGCTACTTGGGAGGCTGAGGTG	0.00099	7	0	NA	NA	NA	NA	NA	NA	NA	NA	NA	NA	NA	NA	NA	NA	NA	NA	NA	NA	NA	NA	NA	NA	NA	NA	NA	NA	NA	NA	NA	NA	NA	NA	NA	NA
1063	F80L absent	chr6	170253162	170253550	3.01749	1.96449	60	23	NA	NA	NA	NA	NA	NA	0	NA	NA	NA	NA	NA	NA	NA	NA	NA	NA	NA	NA	NA	NA	NA	NA	NA	NA	NA	NA	NA	NA	NA	NA	NA	NA	NA	NA	NA	NA	NA	NA	NA	NA
1064	common	chr19	6737359	6738131	3.35577	1.69928	399	170	2	6737919	6737941	TGCATTCTGGGTAATGTAGTCC	2.73e-10	26	2	GPR108	-131	-	protein_coding	4.76924	4.82579	5.01167	4.63227	-0.0656131	0.85504	TRIP10	191	+	protein_coding	3.88264	3.75275	3.72465	4.30524	-0.0873843	0.846439	NA	NA	NA	NA	NA	NA	NA	NA	NA	NA	NA	NA	NA	NA
1065	common	chr3	50388184	50388826	4.7213	3.14166	638	218	4	50388506	50388528	AGCACTATGGAAATTGTAGTTC	1.3e-08	10	3	CYB561D2	-379	+	protein_coding	3.0635	2.72901	3.42358	3.25248	0.389123	0.330082	XXcos-LUCA11.5	-182	+	ND	ND	ND	ND	ND	ND	ND	NPRL2	17	-	protein_coding	4.01346	4.03122	4.21723	4.24108	0.140179	0.63159	NA	NA	NA	NA
1066	common	chr2	9445757	9446001	2.82517	2.63631	22	19	NA	NA	NA	NA	NA	NA	0	NA	NA	NA	NA	NA	NA	NA	NA	NA	NA	NA	NA	NA	NA	NA	NA	NA	NA	NA	NA	NA	NA	NA	NA	NA	NA	NA	NA	NA	NA	NA	NA	NA	NA
1067	common	chr7	135194702	135195236	4.71198	3.14526	528	157	2	135194953	135194975	AGCACCCTGGGAGTTGAAGTCC	2.91e-09	12	1	CNOT4	-94	-	protein_coding	2.24793	2.67582	2.72028	2.85	0.309983	0.343144	NA	NA	NA	NA	NA	NA	NA	NA	NA	NA	NA	NA	NA	NA	NA	NA	NA	NA	NA	NA	NA	NA	NA	NA
1068	common	chr2	241525585	241526142	4.69718	2.99374	658	238	4	241525784	241525806	CGCATGCTGGGAGCTGTAGTCT	1.15e-09	8	2	CAPN10-AS1	253	-	ND	ND	ND	ND	ND	ND	ND	CAPN10	270	+	protein_coding	3.04089	2.81147	2.99458	2.65076	-0.257694	0.655586	NA	NA	NA	NA	NA	NA	NA	NA	NA	NA	NA	NA	NA	NA
1069	common	chr1	1051216	1051909	6.19003	4.34412	2252	723	5	1051561	1051583	GGGCCGCCGGGAGTTGTAGTTT	1.19e-09	11	1	C1orf159	179	-	protein_coding	2.19535	1.30451	1.69599	1.1375	-0.426542	0.628518	NA	NA	NA	NA	NA	NA	NA	NA	NA	NA	NA	NA	NA	NA	NA	NA	NA	NA	NA	NA	NA	NA	NA	NA
1070	common	chr1	151137885	151138688	4.28614	2.92699	500	190	4	151138418	151138440	GGCACCATAGGAAATGCAGTTC	1.12e-06	10	1	LYSMD1	138	-	protein_coding	2.80735	2.75061	4.32193	4.22651	1.39714	3.16563e-21	NA	NA	NA	NA	NA	NA	NA	NA	NA	NA	NA	NA	NA	NA	NA	NA	NA	NA	NA	NA	NA	NA	NA	NA
1071	common	chr9	128023734	128024305	4.75965	3.5763	989	313	1	128024032	128024054	GGGCCTCTGGGAGCTGTAGTTC	4.74e-10	10	1	GAPVD1	54	+	protein_coding	5.48832	5.49825	5.61117	5.61294	0.133765	0.312413	NA	NA	NA	NA	NA	NA	NA	NA	NA	NA	NA	NA	NA	NA	NA	NA	NA	NA	NA	NA	NA	NA	NA	NA
1072	common	chr6	80340671	80341148	4.20498	2.53344	526	185	3	80340929	80340951	GGCTTGATGGGATTTGTAGTTT	2.51e-09	9	1	SH3BGRL2	91	+	protein_coding	3.6241	3.53605	2.86987	2.70929	-0.8168	3.36826e-09	NA	NA	NA	NA	NA	NA	NA	NA	NA	NA	NA	NA	NA	NA	NA	NA	NA	NA	NA	NA	NA	NA	NA	NA
1073	common	chr6	108615887	108616362	3.89583	2.54929	468	187	3	108616061	108616083	TGCATGCTGGGAGTCGTAGTCC	1.56e-10	15	1	LACE1	-26	+	protein_coding	2.12102	2.47249	1.91456	1.9782	-0.461743	0.12889	NA	NA	NA	NA	NA	NA	NA	NA	NA	NA	NA	NA	NA	NA	NA	NA	NA	NA	NA	NA	NA	NA	NA	NA
1074	common	chr10	97667738	97668189	4.647	2.25216	234	98	3	97667939	97667961	AGGCCGCTGGGACTTGTAGTTC	9.4e-10	8	0	NA	NA	NA	NA	NA	NA	NA	NA	NA	NA	NA	NA	NA	NA	NA	NA	NA	NA	NA	NA	NA	NA	NA	NA	NA	NA	NA	NA	NA	NA	NA	NA	NA	NA
1075	common	chr19	37861668	37862235	4.19615	3.4391	685	262	5	37861969	37861991	GGGTCCATGGGGAACGCGGTGT	0.000212	9	1	ZNF527	12	+	protein_coding	2.14078	2.32481	2.89142	2.9222	0.69283	0.000578119	NA	NA	NA	NA	NA	NA	NA	NA	NA	NA	NA	NA	NA	NA	NA	NA	NA	NA	NA	NA	NA	NA	NA	NA
1076	common	chr14	65569108	65569804	5.79364	4.60315	1600	527	4	65569490	65569512	CGCCTCCTGGGAGTCGTAGTCC	3.65e-09	13	1	MAX	-43	-	protein_coding	5.03694	5.02989	4.51412	4.78555	-0.47675	0.0030543	NA	NA	NA	NA	NA	NA	NA	NA	NA	NA	NA	NA	NA	NA	NA	NA	NA	NA	NA	NA	NA	NA	NA	NA
1077	common	chr16	67875676	67876288	3.95723	3.53911	524	193	3	67875897	67875919	GGCATCACGGGATTTGTAGTCT	6.2e-09	19	1	THAP11	231	+	protein_coding	4.51854	4.24413	4.25776	4.03034	-0.265113	0.346042	NA	NA	NA	NA	NA	NA	NA	NA	NA	NA	NA	NA	NA	NA	NA	NA	NA	NA	NA	NA	NA	NA	NA	NA
1078	common	chr1	27930496	27930771	3.59443	1.63053	248	77	1	27930714	27930736	GGCACGCCGGGACTTGTAGTCC	1.38e-09	30	1	AHDC1	309	-	ND	ND	ND	ND	ND	ND	ND	NA	NA	NA	NA	NA	NA	NA	NA	NA	NA	NA	NA	NA	NA	NA	NA	NA	NA	NA	NA	NA	NA	NA	NA
1079	F80L only	chr1	228361936	228362488	0.176573	-4.1325	116	1	NA	NA	NA	NA	NA	NA	0	NA	NA	NA	NA	NA	NA	NA	NA	NA	NA	NA	NA	NA	NA	NA	NA	NA	NA	NA	NA	NA	NA	NA	NA	NA	NA	NA	NA	NA	NA	NA	NA	NA	NA
1080	common	chr1	184723885	184724475	4.28445	2.53309	499	173	7	184724223	184724245	TGCACACTGGGACTGGTAGTCC	3.22e-08	11	1	EDEM3	-133	-	protein_coding	4.40054	4.32912	4.60585	4.58376	0.112359	0.552346	NA	NA	NA	NA	NA	NA	NA	NA	NA	NA	NA	NA	NA	NA	NA	NA	NA	NA	NA	NA	NA	NA	NA	NA
1081	common	chr21	35014015	35014373	3.67409	2.07474	272	100	4	35014149	35014171	AACATGACGGGAGATGTAGTTC	8.22e-08	11	0	NA	NA	NA	NA	NA	NA	NA	NA	NA	NA	NA	NA	NA	NA	NA	NA	NA	NA	NA	NA	NA	NA	NA	NA	NA	NA	NA	NA	NA	NA	NA	NA	NA	NA
1082	F80L absent	chr5	6869439	6870148	1.99401	0.749001	65	25	NA	NA	NA	NA	NA	NA	0	NA	NA	NA	NA	NA	NA	NA	NA	NA	NA	NA	NA	NA	NA	NA	NA	NA	NA	NA	NA	NA	NA	NA	NA	NA	NA	NA	NA	NA	NA	NA	NA	NA	NA
1083	common	chr19	55628978	55629498	4.04127	2.73295	805	302	5	55629099	55629121	GGAGCGCTGGGAAATGGAGTCC	4.16e-08	8	1	PPP1R12C	-311	-	protein_coding	4.30159	3.84699	4.03298	3.86493	-0.26809	0.581299	NA	NA	NA	NA	NA	NA	NA	NA	NA	NA	NA	NA	NA	NA	NA	NA	NA	NA	NA	NA	NA	NA	NA	NA
1084	common	chr20	33734945	33735406	3.29624	1.63501	139	47	2	33735194	33735216	TGCATTCAGGGGCTTGTAGTCC	1.57e-07	21	0	NA	NA	NA	NA	NA	NA	NA	NA	NA	NA	NA	NA	NA	NA	NA	NA	NA	NA	NA	NA	NA	NA	NA	NA	NA	NA	NA	NA	NA	NA	NA	NA	NA	NA
1085	F80L absent	chr9	133871664	133872143	2.11548	0.446683	81	29	NA	NA	NA	NA	NA	NA	0	NA	NA	NA	NA	NA	NA	NA	NA	NA	NA	NA	NA	NA	NA	NA	NA	NA	NA	NA	NA	NA	NA	NA	NA	NA	NA	NA	NA	NA	NA	NA	NA	NA	NA
1086	F80L absent	chr17	42667468	42668521	2.9552	0.766019	141	55	NA	NA	NA	NA	NA	NA	0	NA	NA	NA	NA	NA	NA	NA	NA	NA	NA	NA	NA	NA	NA	NA	NA	NA	NA	NA	NA	NA	NA	NA	NA	NA	NA	NA	NA	NA	NA	NA	NA	NA	NA
1087	F80L absent	chr4	8855125	8855552	2.29541	1.49169	110	64	4	8855291	8855313	ATGCGGCTGGGCATGGTGGCTC	0.000206	40	0	NA	NA	NA	NA	NA	NA	NA	NA	NA	NA	NA	NA	NA	NA	NA	NA	NA	NA	NA	NA	NA	NA	NA	NA	NA	NA	NA	NA	NA	NA	NA	NA	NA	NA
1088	common	chr13	30424714	30425067	3.88304	1.85913	270	100	2	30424860	30424882	AGCATCACGGGAAGTGTAGTCT	1.49e-08	21	1	UBL3	-69	-	protein_coding	4.60763	4.58736	4.8485	4.61471	0.112047	0.619383	NA	NA	NA	NA	NA	NA	NA	NA	NA	NA	NA	NA	NA	NA	NA	NA	NA	NA	NA	NA	NA	NA	NA	NA
1089	common	chr1	156736885	156737552	5.524	4.44474	1313	509	7	156737199	156737221	GGCACGGCGGGAGTTGGAGTCC	2.66e-08	5	1	HDGF	-501	-	protein_coding	7.90412	8.01067	7.87498	8.09249	0.00707994	0.981197	NA	NA	NA	NA	NA	NA	NA	NA	NA	NA	NA	NA	NA	NA	NA	NA	NA	NA	NA	NA	NA	NA	NA	NA
1090	common	chr19	50528559	50529428	3.60868	2.20913	439	161	2	50528723	50528745	AGGCATCTGGGAAACGGAGTTC	1.28e-07	12	2	ZNF473	-22	+	protein_coding	3.8953	3.90977	4.55582	4.54597	0.632699	7.92747e-08	VRK3	210	-	protein_coding	4.63981	4.66562	5.00315	5.0751	0.306641	0.143754	NA	NA	NA	NA	NA	NA	NA	NA	NA	NA	NA	NA	NA	NA
1091	common	chr19	58694407	58695064	4.87144	3.00677	1152	408	2	58694725	58694747	GGGCGTCTGGGAGTTGTAGTTC	4.47e-10	1	1	ZNF274	-339	+	protein_coding	3.06695	2.91265	3.63459	3.48414	0.610473	0.000288114	NA	NA	NA	NA	NA	NA	NA	NA	NA	NA	NA	NA	NA	NA	NA	NA	NA	NA	NA	NA	NA	NA	NA	NA
1092	common	chr1	205180601	205181134	4.40863	3.26835	724	287	2	205180911	205180933	GGTCTCCTGGGACTTGCAGTCC	8.11e-08	43	1	DSTYK	-140	-	protein_coding	2.80735	2.75916	2.96347	2.88362	0.112727	0.601877	NA	NA	NA	NA	NA	NA	NA	NA	NA	NA	NA	NA	NA	NA	NA	NA	NA	NA	NA	NA	NA	NA	NA	NA
1093	F80L absent	chr16	49628407	49628654	1.58925	1.10395	11	5	NA	NA	NA	NA	NA	NA	0	NA	NA	NA	NA	NA	NA	NA	NA	NA	NA	NA	NA	NA	NA	NA	NA	NA	NA	NA	NA	NA	NA	NA	NA	NA	NA	NA	NA	NA	NA	NA	NA	NA	NA
1094	common	chr16	12009645	12010308	6.00778	4.41113	2351	858	4	12009963	12009985	GCGCTGCCGGAACTTGTAGTTC	8.84e-07	11	2	GSPT1	-37	-	protein_coding	6.92196	7.06641	7.17003	7.22988	0.138536	0.323458	AC007216.1	-381	-	ND	ND	ND	ND	ND	ND	ND	NA	NA	NA	NA	NA	NA	NA	NA	NA	NA	NA	NA	NA	NA
1095	F80L absent	chrX	153236494	153236925	1.67945	-0.096602	96	39	2	153236562	153236584	GGAGCGCCCGGACAAGTAGTCG	0.000199	94	0	NA	NA	NA	NA	NA	NA	NA	NA	NA	NA	NA	NA	NA	NA	NA	NA	NA	NA	NA	NA	NA	NA	NA	NA	NA	NA	NA	NA	NA	NA	NA	NA	NA	NA
1096	F80L absent	chr22	23024810	23025301	2.56663	1.00646	42	13	NA	NA	NA	NA	NA	NA	0	NA	NA	NA	NA	NA	NA	NA	NA	NA	NA	NA	NA	NA	NA	NA	NA	NA	NA	NA	NA	NA	NA	NA	NA	NA	NA	NA	NA	NA	NA	NA	NA	NA	NA
1097	common	chr19	44405712	44406207	2.70266	1.33726	138	48	4	44406002	44406024	TGACTTCTGGGAAATGTAGTCC	1.02e-10	4	3	ZNF404	-422	-	protein_coding	1.85599	2.15056	1.25096	1.38957	-0.668139	0.173231	RP11-15A1.3	-2	-	lincRNA	1.51602	1.852	1.25096	1.1177	-0.451225	0.635907	RP11-15A1.2	194	+	ND	ND	ND	ND	ND	ND	ND	NA	NA	NA	NA
1098	common	chr3	184016639	184017068	4.4963	2.58936	499	160	4	184016885	184016907	AGGCCGAGGGGGTGGGTGGGTC	0.000653	21	1	PSMD2	-356	+	protein_coding	7.53854	7.35262	7.41143	7.43971	-0.0693664	0.771161	NA	NA	NA	NA	NA	NA	NA	NA	NA	NA	NA	NA	NA	NA	NA	NA	NA	NA	NA	NA	NA	NA	NA	NA
1099	F80L absent	chr9	136863244	136863635	2.04208	0.429988	74	31	7	136863296	136863318	AGGGATGTGGGATGGGTAGAGG	0.000623	17	0	NA	NA	NA	NA	NA	NA	NA	NA	NA	NA	NA	NA	NA	NA	NA	NA	NA	NA	NA	NA	NA	NA	NA	NA	NA	NA	NA	NA	NA	NA	NA	NA	NA	NA
1100	F80L absent	chr19	59051400	59053936	1.33373	0.0372955	152	53	1	59053239	59053261	GTCTGTGTGGGGAGGGGAGCCC	0.00063	210	0	NA	NA	NA	NA	NA	NA	NA	NA	NA	NA	NA	NA	NA	NA	NA	NA	NA	NA	NA	NA	NA	NA	NA	NA	NA	NA	NA	NA	NA	NA	NA	NA	NA	NA
1101	F80L absent	chr10	3844533	3845172	2.24793	0.290677	43	21	NA	NA	NA	NA	NA	NA	0	NA	NA	NA	NA	NA	NA	NA	NA	NA	NA	NA	NA	NA	NA	NA	NA	NA	NA	NA	NA	NA	NA	NA	NA	NA	NA	NA	NA	NA	NA	NA	NA	NA	NA
1102	F80L absent	chr6	167061123	167061787	1.82392	0.0551767	70	20	NA	NA	NA	NA	NA	NA	0	NA	NA	NA	NA	NA	NA	NA	NA	NA	NA	NA	NA	NA	NA	NA	NA	NA	NA	NA	NA	NA	NA	NA	NA	NA	NA	NA	NA	NA	NA	NA	NA	NA	NA
1103	common	chr2	96931689	96932074	4.49774	2.76105	490	185	3	96931889	96931911	TACCCTCTGGGAGTTGTAGTCG	3.2e-08	2	2	TMEM127	-149	-	protein_coding	2.5656	2.40871	2.46989	2.57046	0.0520557	0.893756	CIAO1	-11	+	protein_coding	5.71589	5.65764	5.64241	5.60585	-0.0714004	0.715116	NA	NA	NA	NA	NA	NA	NA	NA	NA	NA	NA	NA	NA	NA
1104	F80L absent	chr1	7559895	7560495	2.08677	0.612683	62	20	NA	NA	NA	NA	NA	NA	0	NA	NA	NA	NA	NA	NA	NA	NA	NA	NA	NA	NA	NA	NA	NA	NA	NA	NA	NA	NA	NA	NA	NA	NA	NA	NA	NA	NA	NA	NA	NA	NA	NA	NA
1105	common	chr22	29168398	29168818	3.45893	2.19737	284	116	2	29168657	29168679	GGCATGCCGGGATTTGTTGTGT	9.07e-08	4	1	CCDC117	54	+	protein_coding	5.31397	5.45055	5.22033	5.18666	-0.23436	0.108051	NA	NA	NA	NA	NA	NA	NA	NA	NA	NA	NA	NA	NA	NA	NA	NA	NA	NA	NA	NA	NA	NA	NA	NA
1106	F80L absent	chrX	39814649	39815269	2.98355	1.86896	122	53	4	39815052	39815074	AGGAACCTGGGAAATGTAGTTT	4.82e-09	1	0	NA	NA	NA	NA	NA	NA	NA	NA	NA	NA	NA	NA	NA	NA	NA	NA	NA	NA	NA	NA	NA	NA	NA	NA	NA	NA	NA	NA	NA	NA	NA	NA	NA	NA
1107	common	chr6	144416676	144417269	2.97739	1.36219	474	179	3	144416998	144417020	AGGCTTCCGGGACTCCTGGTCG	1.02e-05	1	1	SF3B5	-218	-	protein_coding	7.44037	7.22612	7.13924	6.94942	-0.315095	0.0837166	NA	NA	NA	NA	NA	NA	NA	NA	NA	NA	NA	NA	NA	NA	NA	NA	NA	NA	NA	NA	NA	NA	NA	NA
1108	common	chr1	203764511	203764850	3.72858	2.95869	214	93	3	203764687	203764709	AGGATTCTGGAAGATGTAGTTC	3.08e-09	5	1	ZC3H11A	102	+	protein_coding	6.2426	6.22632	6.23496	6.12619	-0.0889555	0.578468	NA	NA	NA	NA	NA	NA	NA	NA	NA	NA	NA	NA	NA	NA	NA	NA	NA	NA	NA	NA	NA	NA	NA	NA
1109	F80L only	chr5	146563	146831	2.42569	0.10943	44	11	NA	NA	NA	NA	NA	NA	0	NA	NA	NA	NA	NA	NA	NA	NA	NA	NA	NA	NA	NA	NA	NA	NA	NA	NA	NA	NA	NA	NA	NA	NA	NA	NA	NA	NA	NA	NA	NA	NA	NA	NA
1110	common	chr12	133613713	133613974	3.23467	2.25617	135	72	3	133613822	133613844	GGCACTGTGGGAAGTTGAGTTC	3.68e-07	5	2	RP11-386I8.6	-35	-	ND	ND	ND	ND	ND	ND	ND	ZNF84	35	+	protein_coding	3.28392	3.21723	4.13504	4.15218	0.610899	5.80407e-06	NA	NA	NA	NA	NA	NA	NA	NA	NA	NA	NA	NA	NA	NA
1111	F80L absent	chr4	114320141	114320616	2.40325	0.691314	31	11	NA	NA	NA	NA	NA	NA	0	NA	NA	NA	NA	NA	NA	NA	NA	NA	NA	NA	NA	NA	NA	NA	NA	NA	NA	NA	NA	NA	NA	NA	NA	NA	NA	NA	NA	NA	NA	NA	NA	NA	NA
1112	F80L absent	chr9	91673890	91675188	1.98829	0.597366	106	46	NA	NA	NA	NA	NA	NA	0	NA	NA	NA	NA	NA	NA	NA	NA	NA	NA	NA	NA	NA	NA	NA	NA	NA	NA	NA	NA	NA	NA	NA	NA	NA	NA	NA	NA	NA	NA	NA	NA	NA	NA
1113	common	chr6	30312653	30313056	5.18817	3.17595	362	159	4	30312859	30312881	GGCCTCCTGGGAAACGTAGTCC	3.66e-10	17	1	RPP21	54	+	protein_coding	5.09001	4.56438	4.61176	4.72083	-0.193105	0.712911	NA	NA	NA	NA	NA	NA	NA	NA	NA	NA	NA	NA	NA	NA	NA	NA	NA	NA	NA	NA	NA	NA	NA	NA
1114	F80L absent	chr7	54269290	54269692	1.99595	0.998457	28	24	NA	NA	NA	NA	NA	NA	0	NA	NA	NA	NA	NA	NA	NA	NA	NA	NA	NA	NA	NA	NA	NA	NA	NA	NA	NA	NA	NA	NA	NA	NA	NA	NA	NA	NA	NA	NA	NA	NA	NA	NA
1115	F80L absent	chr12	113154381	113154723	2.38839	1.80036	25	12	NA	NA	NA	NA	NA	NA	0	NA	NA	NA	NA	NA	NA	NA	NA	NA	NA	NA	NA	NA	NA	NA	NA	NA	NA	NA	NA	NA	NA	NA	NA	NA	NA	NA	NA	NA	NA	NA	NA	NA	NA
1116	common	chr11	86013026	86013375	4.30055	2.21945	164	78	4	86013193	86013215	CTTGTTCTGGGACTTGTAGTCT	1.42e-06	16	1	C11orf73	53	+	protein_coding	4.91313	4.98641	4.79129	4.82883	-0.199977	0.442454	NA	NA	NA	NA	NA	NA	NA	NA	NA	NA	NA	NA	NA	NA	NA	NA	NA	NA	NA	NA	NA	NA	NA	NA
1117	common	chr17	18585404	18585845	4.5935	2.47751	392	165	2	18585620	18585642	GCGCTTCTGGGAATTGTAGTTC	6.47e-10	2	1	ZNF286B	-49	-	protein_coding	2.82171	2.69153	3.0197	2.91839	0.292197	0.296485	NA	NA	NA	NA	NA	NA	NA	NA	NA	NA	NA	NA	NA	NA	NA	NA	NA	NA	NA	NA	NA	NA	NA	NA
1118	common	chr4	2420458	2420934	4.97731	4.14052	744	291	4	2420574	2420596	TGGCGCCCAGGGCTTGGCGTCC	0.000509	11	2	ZFYVE28	-306	-	ND	ND	ND	ND	ND	ND	ND	RP11-503N18.1	5	+	ND	ND	ND	ND	ND	ND	ND	NA	NA	NA	NA	NA	NA	NA	NA	NA	NA	NA	NA	NA	NA
1119	F80L absent	chr11	134609796	134610146	2.2188	0.870948	78	34	9	134609976	134609998	GGTTGTGTGTGGTATGTAGTGT	0.000385	5	0	NA	NA	NA	NA	NA	NA	NA	NA	NA	NA	NA	NA	NA	NA	NA	NA	NA	NA	NA	NA	NA	NA	NA	NA	NA	NA	NA	NA	NA	NA	NA	NA	NA	NA
1120	F80L absent	chr9	96433434	96434614	2.11482	0.207866	61	18	NA	NA	NA	NA	NA	NA	0	NA	NA	NA	NA	NA	NA	NA	NA	NA	NA	NA	NA	NA	NA	NA	NA	NA	NA	NA	NA	NA	NA	NA	NA	NA	NA	NA	NA	NA	NA	NA	NA	NA	NA
1121	common	chr5	1272653	1274060	1.45319	0.0596404	249	60	NA	NA	NA	NA	NA	NA	0	NA	NA	NA	NA	NA	NA	NA	NA	NA	NA	NA	NA	NA	NA	NA	NA	NA	NA	NA	NA	NA	NA	NA	NA	NA	NA	NA	NA	NA	NA	NA	NA	NA	NA
1122	common	chr16	4674412	4674878	4.71208	3.38576	773	295	2	4674747	4674769	GGCACGTCGGGAAATGGAGTCC	4.08e-08	6	0	NA	NA	NA	NA	NA	NA	NA	NA	NA	NA	NA	NA	NA	NA	NA	NA	NA	NA	NA	NA	NA	NA	NA	NA	NA	NA	NA	NA	NA	NA	NA	NA	NA	NA
1123	F80L absent	chr11	118746337	118746647	2.87303	1.56411	27	12	NA	NA	NA	NA	NA	NA	0	NA	NA	NA	NA	NA	NA	NA	NA	NA	NA	NA	NA	NA	NA	NA	NA	NA	NA	NA	NA	NA	NA	NA	NA	NA	NA	NA	NA	NA	NA	NA	NA	NA	NA
1124	common	chr1	38157805	38158232	4.85023	3.0003	523	190	3	38158003	38158025	GTACTCCTGGGAGTTGTGGTCC	9.19e-08	1	2	C1orf109	-104	-	protein_coding	4.96947	5.00899	5.29866	5.29682	0.228905	0.234182	CDCA8	72	+	protein_coding	4.76022	4.8268	4.82883	5.07938	0.135219	0.645657	NA	NA	NA	NA	NA	NA	NA	NA	NA	NA	NA	NA	NA	NA
1125	common	chr6	43596927	43597428	4.46592	3.02712	570	256	7	43597128	43597150	TGCCTCCTGGGAGTTGTAGGGC	7.24e-09	14	2	GTPBP2	-278	-	protein_coding	4.38888	4.59156	4.54288	4.48156	-0.0636579	0.829342	MAD2L1BP	100	+	protein_coding	4.14568	4.19456	4.34625	4.33628	0.142749	0.636988	NA	NA	NA	NA	NA	NA	NA	NA	NA	NA	NA	NA	NA	NA
1126	F80L absent	chr12	57623222	57623559	3.51699	2.26862	104	37	2	57623380	57623402	GGCCTTTTGGGAATTGTAGTTC	4.43e-11	12	1	SHMT2	-280	+	protein_coding	7.08417	6.75475	6.96798	6.84599	0.0393658	0.896061	NA	NA	NA	NA	NA	NA	NA	NA	NA	NA	NA	NA	NA	NA	NA	NA	NA	NA	NA	NA	NA	NA	NA	NA
1127	common	chr13	41706741	41707140	5.7211	2.58496	207	86	4	41706950	41706972	GGCAACCTGGGAGCGGTAGTTC	4.43e-08	1	1	KBTBD6	-58	-	protein_coding	3.45154	3.45154	3.84197	3.74308	0.320445	0.021515	NA	NA	NA	NA	NA	NA	NA	NA	NA	NA	NA	NA	NA	NA	NA	NA	NA	NA	NA	NA	NA	NA	NA	NA
1128	F80L absent	chr6	109200169	109200594	1.71582	0.444448	82	41	NA	NA	NA	NA	NA	NA	0	NA	NA	NA	NA	NA	NA	NA	NA	NA	NA	NA	NA	NA	NA	NA	NA	NA	NA	NA	NA	NA	NA	NA	NA	NA	NA	NA	NA	NA	NA	NA	NA	NA	NA
1129	F80L absent	chr8	139703981	139704431	2.55486	2.20013	69	30	NA	NA	NA	NA	NA	NA	0	NA	NA	NA	NA	NA	NA	NA	NA	NA	NA	NA	NA	NA	NA	NA	NA	NA	NA	NA	NA	NA	NA	NA	NA	NA	NA	NA	NA	NA	NA	NA	NA	NA	NA
1130	common	chr19	2427394	2427974	4.92783	2.96949	932	353	2	2427606	2427628	GGCACCACGGGAAACGGAGTCC	3.2e-07	11	1	TIMM13	208	-	protein_coding	7.03914	6.19476	6.29884	6.12039	-0.450226	0.276763	NA	NA	NA	NA	NA	NA	NA	NA	NA	NA	NA	NA	NA	NA	NA	NA	NA	NA	NA	NA	NA	NA	NA	NA
1131	common	chr19	48903732	48903994	3.13372	2.14327	117	62	7	48904072	48904094	AGCACTTTGGGAGGCCGAGGCG	6.76e-05	16	0	NA	NA	NA	NA	NA	NA	NA	NA	NA	NA	NA	NA	NA	NA	NA	NA	NA	NA	NA	NA	NA	NA	NA	NA	NA	NA	NA	NA	NA	NA	NA	NA	NA	NA
1132	common	chr7	33168935	33169250	3.54671	1.66626	174	64	2	33169106	33169128	CGACTTCTGGGGGCTGGAGTCC	5.28e-07	20	2	AC074338.5	-337	-	ND	ND	ND	ND	ND	ND	ND	BBS9	-236	+	protein_coding	2.65764	2.78031	3.34056	2.97085	0.246219	0.351094	NA	NA	NA	NA	NA	NA	NA	NA	NA	NA	NA	NA	NA	NA
1133	common	chr16	75182172	75182505	4.63045	3.04107	228	90	3	75182340	75182362	AGGGTCCTCGGAGGGGTGGACC	0.000233	17	1	ZFP1	52	+	protein_coding	3.75916	3.78241	3.5373	3.46205	-0.232049	0.28968	NA	NA	NA	NA	NA	NA	NA	NA	NA	NA	NA	NA	NA	NA	NA	NA	NA	NA	NA	NA	NA	NA	NA	NA
1134	common	chr9	37079460	37079870	3.322	2.49965	187	87	2	37079626	37079648	GTCCTCATGGGAGTTGTAGTTT	1.13e-08	4	2	RP11-220I1.5	108	-	ND	ND	ND	ND	ND	ND	ND	RP11-220I1.1	228	+	lincRNA	4.53916	4.75275	4.80839	4.86592	0.0846399	0.739809	NA	NA	NA	NA	NA	NA	NA	NA	NA	NA	NA	NA	NA	NA
1135	F80L absent	chr19	51963688	51964044	2.89098	0.969378	60	23	3	51963856	51963878	GGGATTCTGGGAATTGTAGTTC	2.39e-12	29	0	NA	NA	NA	NA	NA	NA	NA	NA	NA	NA	NA	NA	NA	NA	NA	NA	NA	NA	NA	NA	NA	NA	NA	NA	NA	NA	NA	NA	NA	NA	NA	NA	NA	NA
1136	F80L absent	chr2	240267541	240268736	2.32385	1.3024	108	57	1	240267938	240267960	GGGTGTCTGTGTATTAAAGTAT	0.000713	103	0	NA	NA	NA	NA	NA	NA	NA	NA	NA	NA	NA	NA	NA	NA	NA	NA	NA	NA	NA	NA	NA	NA	NA	NA	NA	NA	NA	NA	NA	NA	NA	NA	NA	NA
1137	F80L absent	chr19	50500326	50501648	1.27795	0.26975	111	63	NA	NA	NA	NA	NA	NA	0	NA	NA	NA	NA	NA	NA	NA	NA	NA	NA	NA	NA	NA	NA	NA	NA	NA	NA	NA	NA	NA	NA	NA	NA	NA	NA	NA	NA	NA	NA	NA	NA	NA	NA
1138	F80L absent	chr16	81648544	81649458	1.53628	0.947621	87	49	NA	NA	NA	NA	NA	NA	0	NA	NA	NA	NA	NA	NA	NA	NA	NA	NA	NA	NA	NA	NA	NA	NA	NA	NA	NA	NA	NA	NA	NA	NA	NA	NA	NA	NA	NA	NA	NA	NA	NA	NA
1139	common	chr1	63249385	63249849	4.20746	3.02227	266	90	5	63249494	63249516	GGCCTGCTGGTAGTTGAAGTCC	3.55e-08	9	1	ATG4C	189	+	protein_coding	4.24717	4.57894	4.30597	4.43229	-0.0573676	0.831892	NA	NA	NA	NA	NA	NA	NA	NA	NA	NA	NA	NA	NA	NA	NA	NA	NA	NA	NA	NA	NA	NA	NA	NA
1140	common	chr7	74867548	74868031	5.06416	3.60874	592	164	2	74867653	74867675	TGCGCAGCGGGGACCGGCGTTT	0.000924	14	1	GATSL2	-280	-	protein_coding	2.53107	2.18587	2.56071	1.69599	-0.167528	0.859456	NA	NA	NA	NA	NA	NA	NA	NA	NA	NA	NA	NA	NA	NA	NA	NA	NA	NA	NA	NA	NA	NA	NA	NA
1141	common	chr14	24020854	24021237	5.18854	2.60379	355	135	2	24021036	24021058	CGCATGCCGGGAGTTGTAGTCT	1.32e-09	4	0	NA	NA	NA	NA	NA	NA	NA	NA	NA	NA	NA	NA	NA	NA	NA	NA	NA	NA	NA	NA	NA	NA	NA	NA	NA	NA	NA	NA	NA	NA	NA	NA	NA	NA
1142	common	chr19	37708651	37709227	3.90289	2.47701	275	121	3	37709044	37709066	GGGCCTCTGGGAAATACAGTCC	1.68e-07	32	2	ZNF383	-111	+	protein_coding	2.23266	2.49825	2.70487	2.54102	0.301366	0.462582	ZNF585B	116	-	protein_coding	2.34483	2.9982	3.23266	3.06178	0.43517	0.140062	NA	NA	NA	NA	NA	NA	NA	NA	NA	NA	NA	NA	NA	NA
1143	F80L absent	chr3	76779419	76780310	2.38635	1.6986	90	46	NA	NA	NA	NA	NA	NA	0	NA	NA	NA	NA	NA	NA	NA	NA	NA	NA	NA	NA	NA	NA	NA	NA	NA	NA	NA	NA	NA	NA	NA	NA	NA	NA	NA	NA	NA	NA	NA	NA	NA	NA
1144	common	chr2	128785470	128785972	3.84209	2.06338	483	179	1	128785784	128785806	CGTCCTGTGGGAAATGTAGTCG	3.74e-07	43	1	SAP130	-27	-	protein_coding	2.72683	2.848	2.70708	2.88947	-0.00636678	0.988606	NA	NA	NA	NA	NA	NA	NA	NA	NA	NA	NA	NA	NA	NA	NA	NA	NA	NA	NA	NA	NA	NA	NA	NA
1145	F80L absent	chr1	148881206	148881492	1.33575	-0.133803	70	28	NA	NA	NA	NA	NA	NA	0	NA	NA	NA	NA	NA	NA	NA	NA	NA	NA	NA	NA	NA	NA	NA	NA	NA	NA	NA	NA	NA	NA	NA	NA	NA	NA	NA	NA	NA	NA	NA	NA	NA	NA
1146	common	chr2	85645278	85646019	4.7342	3.77841	1095	410	3	85645807	85645829	TGCCTGCCGGGATTTGTAGTTT	7.02e-10	60	2	CAPG	-93	-	ND	ND	ND	ND	ND	ND	ND	SH2D6	196	+	ND	ND	ND	ND	ND	ND	ND	NA	NA	NA	NA	NA	NA	NA	NA	NA	NA	NA	NA	NA	NA
1147	F80L absent	chr22	44731031	44731937	2.11332	1.13233	147	70	2	44731466	44731488	TGTGAGATGTGAGTGGTGGTGT	0.000934	22	0	NA	NA	NA	NA	NA	NA	NA	NA	NA	NA	NA	NA	NA	NA	NA	NA	NA	NA	NA	NA	NA	NA	NA	NA	NA	NA	NA	NA	NA	NA	NA	NA	NA	NA
1148	common	chr15	79164809	79165399	5.46587	4.53397	1537	548	4	79165109	79165131	GGCACGCCGGGACTGGTAGTTC	1.57e-08	20	0	NA	NA	NA	NA	NA	NA	NA	NA	NA	NA	NA	NA	NA	NA	NA	NA	NA	NA	NA	NA	NA	NA	NA	NA	NA	NA	NA	NA	NA	NA	NA	NA	NA	NA
1149	common	chr13	25496815	25497369	4.77428	3.45252	721	307	5	25497080	25497102	GCGTCACTGGGAGTTGTAGTTT	1.83e-07	7	1	CENPJ	-74	-	protein_coding	4.56864	4.74846	4.81096	4.81865	0.144959	0.479378	NA	NA	NA	NA	NA	NA	NA	NA	NA	NA	NA	NA	NA	NA	NA	NA	NA	NA	NA	NA	NA	NA	NA	NA
1150	F80L absent	chr22	51066955	51067466	1.28281	0.707447	56	31	NA	NA	NA	NA	NA	NA	0	NA	NA	NA	NA	NA	NA	NA	NA	NA	NA	NA	NA	NA	NA	NA	NA	NA	NA	NA	NA	NA	NA	NA	NA	NA	NA	NA	NA	NA	NA	NA	NA	NA	NA
1151	common	chr16	87536105	87536363	2.91058	1.71201	62	19	2	87536206	87536228	GGGTGTATGTGGCATGTGGTGT	0.000557	99	0	NA	NA	NA	NA	NA	NA	NA	NA	NA	NA	NA	NA	NA	NA	NA	NA	NA	NA	NA	NA	NA	NA	NA	NA	NA	NA	NA	NA	NA	NA	NA	NA	NA	NA
1152	common	chr1	115299856	115300457	4.83279	3.59561	707	236	5	115300183	115300205	AGGCTGCTGGGATCTGTAGTCT	2.49e-09	0	0	NA	NA	NA	NA	NA	NA	NA	NA	NA	NA	NA	NA	NA	NA	NA	NA	NA	NA	NA	NA	NA	NA	NA	NA	NA	NA	NA	NA	NA	NA	NA	NA	NA	NA
1153	common	chr12	50505478	50505886	2.89696	1.17942	153	55	2	50505675	50505697	TGAATTCTGGGGGCTGTGGTTT	1.34e-07	12	2	COX14	80	+	protein_coding	4.44427	4.77189	5.04832	4.95699	0.337373	0.328828	RP4-605O3.4	298	+	ND	ND	ND	ND	ND	ND	ND	NA	NA	NA	NA	NA	NA	NA	NA	NA	NA	NA	NA	NA	NA
1154	common	chr19	57049666	57050146	4.02435	3.13586	285	99	5	57050036	57050058	TGCCCGCTGGGAAGCGTAGTCC	4.49e-09	16	2	AC005498.3	38	-	ND	ND	ND	ND	ND	ND	ND	ZFP28	411	+	protein_coding	0.871844	1.25096	1.73552	1.46989	0.775741	0.00645849	NA	NA	NA	NA	NA	NA	NA	NA	NA	NA	NA	NA	NA	NA
1155	F80L absent	chr5	2594646	2595109	2.23784	0.536501	88	34	NA	NA	NA	NA	NA	NA	0	NA	NA	NA	NA	NA	NA	NA	NA	NA	NA	NA	NA	NA	NA	NA	NA	NA	NA	NA	NA	NA	NA	NA	NA	NA	NA	NA	NA	NA	NA	NA	NA	NA	NA
1156	common	chr16	70488067	70488750	4.42796	3.75489	657	261	3	70488449	70488471	TGCACTCCGGGAAGTGTAGTTT	1.77e-09	43	1	FUK	-84	+	protein_coding	2.69377	2.18903	2.05311	1.64616	-0.713104	0.0642486	NA	NA	NA	NA	NA	NA	NA	NA	NA	NA	NA	NA	NA	NA	NA	NA	NA	NA	NA	NA	NA	NA	NA	NA
1157	common	chr16	70472952	70473671	5.52501	5.06609	1982	770	8	70473235	70473257	TGTCTTCTGGGAGATGTAGTCC	3.79e-10	13	1	ST3GAL2	-171	-	protein_coding	3.488	2.88947	2.13422	2.19849	-0.79541	0.015201	NA	NA	NA	NA	NA	NA	NA	NA	NA	NA	NA	NA	NA	NA	NA	NA	NA	NA	NA	NA	NA	NA	NA	NA
1158	common	chr19	54605869	54606323	4.69375	3.2007	372	166	3	54606031	54606053	AGCACTCTGGGAGTTGTGGTCC	6.39e-10	45	2	OSCAR	-96	-	ND	ND	ND	ND	ND	ND	ND	NDUFA3	-60	+	protein_coding	7.47994	7.21043	7.28503	7.46058	0.0390686	0.924743	NA	NA	NA	NA	NA	NA	NA	NA	NA	NA	NA	NA	NA	NA
1159	F80L absent	chr19	50251986	50252900	2.08231	0.959832	127	67	NA	NA	NA	NA	NA	NA	0	NA	NA	NA	NA	NA	NA	NA	NA	NA	NA	NA	NA	NA	NA	NA	NA	NA	NA	NA	NA	NA	NA	NA	NA	NA	NA	NA	NA	NA	NA	NA	NA	NA	NA
1160	F80L absent	chr4	6374620	6375047	2.24669	1.96294	54	28	NA	NA	NA	NA	NA	NA	0	NA	NA	NA	NA	NA	NA	NA	NA	NA	NA	NA	NA	NA	NA	NA	NA	NA	NA	NA	NA	NA	NA	NA	NA	NA	NA	NA	NA	NA	NA	NA	NA	NA	NA
1161	F80L absent	chr15	76461472	76462045	2.26998	1.8122	75	39	1	76461594	76461616	GGAGGGCTGGGAAATGTAGTCT	3.65e-08	1	0	NA	NA	NA	NA	NA	NA	NA	NA	NA	NA	NA	NA	NA	NA	NA	NA	NA	NA	NA	NA	NA	NA	NA	NA	NA	NA	NA	NA	NA	NA	NA	NA	NA	NA
1162	common	chr19	5680309	5681071	5.20459	3.85462	1675	638	5	5680710	5680732	GGCTGTCTGGGAAATGTAGTCA	1.85e-08	8	2	HSD11B1L	-75	+	protein_coding	1.07039	0.516015	1.04264	0.9855	0.282059	0.777231	C19orf70	217	-	protein_coding	5.77873	5.16631	5.20438	5.10601	-0.338371	0.441265	NA	NA	NA	NA	NA	NA	NA	NA	NA	NA	NA	NA	NA	NA
1163	common	chr19	37063948	37064449	3.82991	2.27374	365	174	3	37064239	37064261	AGGCCTGTGGGAAACGTAGTCC	2.17e-08	2	1	AC092295.7	-226	+	antisense	0.286881	0.910733	1.37295	1.36177	0.698118	0.479895	NA	NA	NA	NA	NA	NA	NA	NA	NA	NA	NA	NA	NA	NA	NA	NA	NA	NA	NA	NA	NA	NA	NA	NA
1164	F80L absent	chr11	61891068	61891560	2.96212	1.53937	127	53	3	61891216	61891238	TGCTCGCCGGGACTCGTAGTTC	9.75e-08	27	1	INCENP	131	+	protein_coding	5.74308	5.64414	5.77426	5.67948	-0.187464	0.562868	NA	NA	NA	NA	NA	NA	NA	NA	NA	NA	NA	NA	NA	NA	NA	NA	NA	NA	NA	NA	NA	NA	NA	NA
1165	common	chr3	14166051	14166659	4.98618	3.83684	1011	381	3	14166365	14166387	GACCTGCTGGGAAATGTAGTTT	1.42e-09	19	2	CHCHD4	15	-	protein_coding	4.1416	4.28021	4.5097	4.61589	0.328059	0.16939	TMEM43	85	+	protein_coding	4.53916	4.40599	4.52607	4.47703	0.0123097	0.966905	NA	NA	NA	NA	NA	NA	NA	NA	NA	NA	NA	NA	NA	NA
1166	F80L absent	chr1	965001	966400	1.82018	0.120294	99	36	NA	NA	NA	NA	NA	NA	0	NA	NA	NA	NA	NA	NA	NA	NA	NA	NA	NA	NA	NA	NA	NA	NA	NA	NA	NA	NA	NA	NA	NA	NA	NA	NA	NA	NA	NA	NA	NA	NA	NA	NA
1167	common	chr16	4816966	4817563	3.695	2.17049	460	174	7	4817269	4817291	TGCACTGTGGTTAATGTGGTCC	3.35e-06	0	1	ZNF500	361	-	protein_coding	2.62059	2.18269	2.46989	2.12102	-0.113672	0.828241	NA	NA	NA	NA	NA	NA	NA	NA	NA	NA	NA	NA	NA	NA	NA	NA	NA	NA	NA	NA	NA	NA	NA	NA
1168	F80L absent	chr5	552393	553526	0.930119	0.3354	197	114	3	552850	552872	GGCTTGTTAGAGATGGGAGGCT	0.00066	58	0	NA	NA	NA	NA	NA	NA	NA	NA	NA	NA	NA	NA	NA	NA	NA	NA	NA	NA	NA	NA	NA	NA	NA	NA	NA	NA	NA	NA	NA	NA	NA	NA	NA	NA
1169	F80L absent	chr1	42632179	42632878	1.71621	1.16993	62	29	NA	NA	NA	NA	NA	NA	0	NA	NA	NA	NA	NA	NA	NA	NA	NA	NA	NA	NA	NA	NA	NA	NA	NA	NA	NA	NA	NA	NA	NA	NA	NA	NA	NA	NA	NA	NA	NA	NA	NA	NA
1170	F80L absent	chr1	44025505	44025764	2.7885	0.392317	43	10	NA	NA	NA	NA	NA	NA	0	NA	NA	NA	NA	NA	NA	NA	NA	NA	NA	NA	NA	NA	NA	NA	NA	NA	NA	NA	NA	NA	NA	NA	NA	NA	NA	NA	NA	NA	NA	NA	NA	NA	NA
1171	F80L absent	chr10	128814903	128815795	1.3482	0.336103	80	44	NA	NA	NA	NA	NA	NA	0	NA	NA	NA	NA	NA	NA	NA	NA	NA	NA	NA	NA	NA	NA	NA	NA	NA	NA	NA	NA	NA	NA	NA	NA	NA	NA	NA	NA	NA	NA	NA	NA	NA	NA
1172	F80L only	chr1	4137328	4138194	0.807317	-0.41837	87	27	7	4137408	4137430	TGACTGTTGGGAGGTCTCACTG	0.00079	18	0	NA	NA	NA	NA	NA	NA	NA	NA	NA	NA	NA	NA	NA	NA	NA	NA	NA	NA	NA	NA	NA	NA	NA	NA	NA	NA	NA	NA	NA	NA	NA	NA	NA	NA
1173	common	chr17	38443765	38444063	3.71077	2.77362	154	79	4	38443845	38443867	AGCACGCTGGGAGGCGTAGTCT	7.41e-09	9	1	CDC6	-29	+	protein_coding	6.20614	6.22882	6.54257	6.66092	0.259826	0.0159292	NA	NA	NA	NA	NA	NA	NA	NA	NA	NA	NA	NA	NA	NA	NA	NA	NA	NA	NA	NA	NA	NA	NA	NA
1174	common	chr2	27255278	27255952	3.93154	2.7669	554	257	1	27255744	27255766	GGCAGCCTGGGACTTGTAGTCC	2.2e-09	10	1	TMEM214	163	+	protein_coding	3.7845	4.15056	4.0036	3.77083	-0.241798	0.322207	NA	NA	NA	NA	NA	NA	NA	NA	NA	NA	NA	NA	NA	NA	NA	NA	NA	NA	NA	NA	NA	NA	NA	NA
1175	F80L absent	chr18	55797423	55798574	2.22913	0.794183	80	31	NA	NA	NA	NA	NA	NA	0	NA	NA	NA	NA	NA	NA	NA	NA	NA	NA	NA	NA	NA	NA	NA	NA	NA	NA	NA	NA	NA	NA	NA	NA	NA	NA	NA	NA	NA	NA	NA	NA	NA	NA
1176	common	chr19	49384785	49385395	3.76851	2.15097	486	212	4	49385138	49385160	AGCCTATTGGGAATTGTAGTTT	3.08e-09	15	0	NA	NA	NA	NA	NA	NA	NA	NA	NA	NA	NA	NA	NA	NA	NA	NA	NA	NA	NA	NA	NA	NA	NA	NA	NA	NA	NA	NA	NA	NA	NA	NA	NA	NA
1177	common	chr5	175395138	175395502	4.02858	2.31677	366	164	2	175395348	175395370	TGCATACCGGGATTTGTAGTCC	4.74e-09	105	0	NA	NA	NA	NA	NA	NA	NA	NA	NA	NA	NA	NA	NA	NA	NA	NA	NA	NA	NA	NA	NA	NA	NA	NA	NA	NA	NA	NA	NA	NA	NA	NA	NA	NA
1178	common	chr9	140188729	140188988	3.52541	1.98351	154	67	5	140188834	140188856	GGGAGGCTGGGAAATGTAGTCT	1.12e-09	9	0	NA	NA	NA	NA	NA	NA	NA	NA	NA	NA	NA	NA	NA	NA	NA	NA	NA	NA	NA	NA	NA	NA	NA	NA	NA	NA	NA	NA	NA	NA	NA	NA	NA	NA
1179	F80L absent	chr21	47478270	47478833	2.23087	0.732846	49	27	NA	NA	NA	NA	NA	NA	0	NA	NA	NA	NA	NA	NA	NA	NA	NA	NA	NA	NA	NA	NA	NA	NA	NA	NA	NA	NA	NA	NA	NA	NA	NA	NA	NA	NA	NA	NA	NA	NA	NA	NA
1180	F80L absent	chr4	2010415	2010993	1.61023	0.404748	76	31	NA	NA	NA	NA	NA	NA	0	NA	NA	NA	NA	NA	NA	NA	NA	NA	NA	NA	NA	NA	NA	NA	NA	NA	NA	NA	NA	NA	NA	NA	NA	NA	NA	NA	NA	NA	NA	NA	NA	NA	NA
1181	common	chr1	44412106	44412725	4.72699	3.26885	926	362	2	44412338	44412360	TTCACCCTGGGAAATGTAGTCC	6.6e-09	9	2	RP11-7O11.3	-192	-	ND	ND	ND	ND	ND	ND	ND	IPO13	196	+	protein_coding	4.13175	3.94673	4.17552	3.94767	-0.00757457	0.983177	NA	NA	NA	NA	NA	NA	NA	NA	NA	NA	NA	NA	NA	NA
1182	F80L absent	chr9	126735307	126736310	2.31973	1.66995	95	41	NA	NA	NA	NA	NA	NA	0	NA	NA	NA	NA	NA	NA	NA	NA	NA	NA	NA	NA	NA	NA	NA	NA	NA	NA	NA	NA	NA	NA	NA	NA	NA	NA	NA	NA	NA	NA	NA	NA	NA	NA
1183	F80L absent	chr6	40662624	40663117	1.98007	0.780193	54	19	NA	NA	NA	NA	NA	NA	0	NA	NA	NA	NA	NA	NA	NA	NA	NA	NA	NA	NA	NA	NA	NA	NA	NA	NA	NA	NA	NA	NA	NA	NA	NA	NA	NA	NA	NA	NA	NA	NA	NA	NA
1184	F80L absent	chr8	18067336	18067643	3.5878	1.8476	58	26	3	18067508	18067530	GGGCCCCTGGGAAATGTAGTTG	3e-09	15	0	NA	NA	NA	NA	NA	NA	NA	NA	NA	NA	NA	NA	NA	NA	NA	NA	NA	NA	NA	NA	NA	NA	NA	NA	NA	NA	NA	NA	NA	NA	NA	NA	NA	NA
1185	F80L absent	chr19	58609388	58609803	2.42509	0.89806	88	39	2	58609635	58609657	GGCATTGTGGGAGTCGTAGTCC	8.31e-10	1	0	NA	NA	NA	NA	NA	NA	NA	NA	NA	NA	NA	NA	NA	NA	NA	NA	NA	NA	NA	NA	NA	NA	NA	NA	NA	NA	NA	NA	NA	NA	NA	NA	NA	NA
1186	F80L absent	chr16	52788153	52788921	1.97175	1.20174	97	33	NA	NA	NA	NA	NA	NA	0	NA	NA	NA	NA	NA	NA	NA	NA	NA	NA	NA	NA	NA	NA	NA	NA	NA	NA	NA	NA	NA	NA	NA	NA	NA	NA	NA	NA	NA	NA	NA	NA	NA	NA
1187	common	chr11	450044	450492	4.83661	2.82285	781	282	6	450236	450258	GGCATGCTGGGCCTTGTGGTCC	4.55e-08	9	0	NA	NA	NA	NA	NA	NA	NA	NA	NA	NA	NA	NA	NA	NA	NA	NA	NA	NA	NA	NA	NA	NA	NA	NA	NA	NA	NA	NA	NA	NA	NA	NA	NA	NA
1188	common	chr1	28695968	28696359	4.32414	2.09927	335	120	5	28696195	28696217	AGCCGGCTGGACAGTGTAGGGT	6.45e-05	10	1	PHACTR4	-49	+	protein_coding	2.79494	2.87381	2.74416	3.22342	0.0872331	0.856808	NA	NA	NA	NA	NA	NA	NA	NA	NA	NA	NA	NA	NA	NA	NA	NA	NA	NA	NA	NA	NA	NA	NA	NA
1189	common	chr8	144568929	144570662	1.54214	-0.0278306	138	34	NA	NA	NA	NA	NA	NA	0	NA	NA	NA	NA	NA	NA	NA	NA	NA	NA	NA	NA	NA	NA	NA	NA	NA	NA	NA	NA	NA	NA	NA	NA	NA	NA	NA	NA	NA	NA	NA	NA	NA	NA
1190	common	chr19	37825202	37825697	3.72786	2.89666	233	99	2	37825470	37825492	AGGCCTCTGGGGATTGTAGTTT	3.39e-09	45	0	NA	NA	NA	NA	NA	NA	NA	NA	NA	NA	NA	NA	NA	NA	NA	NA	NA	NA	NA	NA	NA	NA	NA	NA	NA	NA	NA	NA	NA	NA	NA	NA	NA	NA
1191	common	chr19	45894310	45894812	2.2496	0.618371	114	38	3	45894372	45894394	TTGAACCTGGGAGGCGGAGGTT	4.93e-05	37	0	NA	NA	NA	NA	NA	NA	NA	NA	NA	NA	NA	NA	NA	NA	NA	NA	NA	NA	NA	NA	NA	NA	NA	NA	NA	NA	NA	NA	NA	NA	NA	NA	NA	NA
1192	F80L absent	chr5	9408151	9408358	1.77015	0.368151	63	29	6	9408213	9408235	ATGGTGGTGGTGATGGTAGTGT	0.000427	17	0	NA	NA	NA	NA	NA	NA	NA	NA	NA	NA	NA	NA	NA	NA	NA	NA	NA	NA	NA	NA	NA	NA	NA	NA	NA	NA	NA	NA	NA	NA	NA	NA	NA	NA
1193	F80L absent	chr6	168918881	168919523	1.70103	0.423785	73	25	NA	NA	NA	NA	NA	NA	0	NA	NA	NA	NA	NA	NA	NA	NA	NA	NA	NA	NA	NA	NA	NA	NA	NA	NA	NA	NA	NA	NA	NA	NA	NA	NA	NA	NA	NA	NA	NA	NA	NA	NA
1194	common	chr8	142955427	142955772	2.44688	1.56513	119	63	7	142955696	142955718	AGGGTGATGGGAACTGTGTGTA	0.000109	5	0	NA	NA	NA	NA	NA	NA	NA	NA	NA	NA	NA	NA	NA	NA	NA	NA	NA	NA	NA	NA	NA	NA	NA	NA	NA	NA	NA	NA	NA	NA	NA	NA	NA	NA
1195	common	chr16	2097397	2098142	5.24309	3.46043	1487	570	4	2097916	2097938	AGCTTGCTGGGAGTTGTAGTTC	8.18e-11	24	2	TSC2	-303	+	protein_coding	4.87676	4.82528	4.95838	4.72846	-0.144108	0.670266	NTHL1	98	-	protein_coding	4.30524	3.43429	3.89821	3.65306	-0.194534	0.79321	NA	NA	NA	NA	NA	NA	NA	NA	NA	NA	NA	NA	NA	NA
1196	common	chr19	14016762	14017423	5.11972	3.38772	1058	429	4	14016998	14017020	TACCTGCCGGGAGTTGTAGTTT	1.28e-08	19	2	CC2D1A	-78	+	protein_coding	3.76022	3.94953	4.0993	4.1102	-0.0632161	0.874824	C19orf57	173	-	protein_coding	1.58496	1.53107	2.38681	1.97453	0.441031	0.353282	NA	NA	NA	NA	NA	NA	NA	NA	NA	NA	NA	NA	NA	NA
1197	common	chr4	3533979	3534480	4.57178	3.36633	590	253	4	3534219	3534241	GGTCTCCTGGGAATTGTAGTTC	2.41e-10	7	1	LRPAP1	57	-	protein_coding	6.37608	5.75114	6.0847	5.91313	-0.142696	0.755205	NA	NA	NA	NA	NA	NA	NA	NA	NA	NA	NA	NA	NA	NA	NA	NA	NA	NA	NA	NA	NA	NA	NA	NA
1198	common	chr16	2009178	2009759	5.26154	3.55924	1023	440	3	2009473	2009495	TGCACCATGGGACTTGTAGTTC	3.36e-09	1	1	NDUFB10	41	+	protein_coding	7.54164	7.43704	7.52873	7.72989	0.118977	0.64985	NA	NA	NA	NA	NA	NA	NA	NA	NA	NA	NA	NA	NA	NA	NA	NA	NA	NA	NA	NA	NA	NA	NA	NA
1199	common	chr19	51152750	51153246	4.71928	2.69651	284	118	3	51152938	51152960	AGGCTCATGGGAAATGTAGTTT	1.56e-09	9	1	C19orf81	-296	+	ND	ND	ND	ND	ND	ND	ND	NA	NA	NA	NA	NA	NA	NA	NA	NA	NA	NA	NA	NA	NA	NA	NA	NA	NA	NA	NA	NA	NA	NA	NA
1200	F80L absent	chr19	7598843	7599129	2.38192	0.800677	59	30	NA	NA	NA	NA	NA	NA	1	PNPLA6	-96	+	protein_coding	3.07211	2.90497	4.49121	4.28983	0.978109	0.0117334	NA	NA	NA	NA	NA	NA	NA	NA	NA	NA	NA	NA	NA	NA	NA	NA	NA	NA	NA	NA	NA	NA	NA	NA
1201	F80L absent	chr20	43367514	43367887	3.17158	2.28569	66	34	1	43367697	43367719	AGGATGCTGGGAAATGTAGTCT	5.64e-11	2	0	NA	NA	NA	NA	NA	NA	NA	NA	NA	NA	NA	NA	NA	NA	NA	NA	NA	NA	NA	NA	NA	NA	NA	NA	NA	NA	NA	NA	NA	NA	NA	NA	NA	NA
1202	F80L absent	chr10	130683551	130684455	2.14419	0.66186	84	29	NA	NA	NA	NA	NA	NA	0	NA	NA	NA	NA	NA	NA	NA	NA	NA	NA	NA	NA	NA	NA	NA	NA	NA	NA	NA	NA	NA	NA	NA	NA	NA	NA	NA	NA	NA	NA	NA	NA	NA	NA
1203	common	chr19	58987177	58987689	3.9016	2.57079	490	162	3	58987402	58987424	ATGCTCATGGGAAATGTAGTTC	4.25e-08	46	1	CTD-2619J13.23	-303	-	ND	ND	ND	ND	ND	ND	ND	NA	NA	NA	NA	NA	NA	NA	NA	NA	NA	NA	NA	NA	NA	NA	NA	NA	NA	NA	NA	NA	NA	NA	NA
1204	common	chr20	23401973	23402436	4.51779	3.61838	514	212	4	23402148	23402170	GGCCTTTCGGGAGCTGTAGTCC	6.85e-09	10	1	NAPB	-79	-	protein_coding	2.1635	2.35896	2.96347	2.74416	0.458156	0.0545847	NA	NA	NA	NA	NA	NA	NA	NA	NA	NA	NA	NA	NA	NA	NA	NA	NA	NA	NA	NA	NA	NA	NA	NA
1205	common	chr19	58962677	58963214	3.10105	2.45367	384	172	4	58962953	58962975	TGAGCTCTGGGGGCTGGACTTC	1.47e-05	18	1	ZNF324B	26	+	protein_coding	3.34056	3.25852	4.04963	3.84298	0.610805	0.00121017	NA	NA	NA	NA	NA	NA	NA	NA	NA	NA	NA	NA	NA	NA	NA	NA	NA	NA	NA	NA	NA	NA	NA	NA
1206	common	chr1	247095249	247095847	5.32527	3.42121	595	251	4	247095573	247095595	GCGCAGTTGGGAGTGGTAGTCT	2.47e-06	25	1	AHCTF1	-268	-	protein_coding	4.69042	4.7447	5.01123	4.96717	0.239723	0.0347756	NA	NA	NA	NA	NA	NA	NA	NA	NA	NA	NA	NA	NA	NA	NA	NA	NA	NA	NA	NA	NA	NA	NA	NA
1207	F80L absent	chr2	178214085	178216570	1.38197	0.398534	152	58	NA	NA	NA	NA	NA	NA	0	NA	NA	NA	NA	NA	NA	NA	NA	NA	NA	NA	NA	NA	NA	NA	NA	NA	NA	NA	NA	NA	NA	NA	NA	NA	NA	NA	NA	NA	NA	NA	NA	NA	NA
1208	F80L absent	chr18	60758972	60759294	1.69093	0.824734	75	45	4	60759076	60759098	AGCGTGGTGTGGTGTGTAGTGT	9.6e-05	57	0	NA	NA	NA	NA	NA	NA	NA	NA	NA	NA	NA	NA	NA	NA	NA	NA	NA	NA	NA	NA	NA	NA	NA	NA	NA	NA	NA	NA	NA	NA	NA	NA	NA	NA
1209	common	chr12	132813344	132819422	1.43142	0.220052	354	123	5	132815652	132815674	GGGCCCCTGGAAGGGGGTGTGT	8.79e-05	26	0	NA	NA	NA	NA	NA	NA	NA	NA	NA	NA	NA	NA	NA	NA	NA	NA	NA	NA	NA	NA	NA	NA	NA	NA	NA	NA	NA	NA	NA	NA	NA	NA	NA	NA
1210	common	chr7	112090077	112091264	4.11654	2.88739	836	335	6	112090972	112090994	GGCACGCTGGGAATTGTAGTTC	8.44e-12	1	0	NA	NA	NA	NA	NA	NA	NA	NA	NA	NA	NA	NA	NA	NA	NA	NA	NA	NA	NA	NA	NA	NA	NA	NA	NA	NA	NA	NA	NA	NA	NA	NA	NA	NA
1211	common	chr12	56546093	56546586	5.47195	3.04396	525	209	1	56546308	56546330	AGCATGCCGGGAGTCGTAGTTC	1.65e-09	9	1	MYL6B	-299	+	protein_coding	6.04418	5.79857	6.1918	6.17592	0.230411	0.323995	NA	NA	NA	NA	NA	NA	NA	NA	NA	NA	NA	NA	NA	NA	NA	NA	NA	NA	NA	NA	NA	NA	NA	NA
1212	F80L absent	chr1	229113525	229113981	2.28167	1.39476	76	39	5	229113814	229113836	TGGGGTGTGGGATGTGTGTTAT	0.000326	21	0	NA	NA	NA	NA	NA	NA	NA	NA	NA	NA	NA	NA	NA	NA	NA	NA	NA	NA	NA	NA	NA	NA	NA	NA	NA	NA	NA	NA	NA	NA	NA	NA	NA	NA
1213	common	chr7	150924124	150924703	5.16993	3.67409	707	298	5	150924419	150924441	AGGTCTGTGGGATACATAGTAG	8.98e-05	8	1	ABCF2	-97	-	protein_coding	5.63691	5.61412	5.61058	5.6091	-0.10262	0.54864	NA	NA	NA	NA	NA	NA	NA	NA	NA	NA	NA	NA	NA	NA	NA	NA	NA	NA	NA	NA	NA	NA	NA	NA
1214	F80L absent	chr5	173495659	173496134	2.21923	1.22155	50	18	NA	NA	NA	NA	NA	NA	0	NA	NA	NA	NA	NA	NA	NA	NA	NA	NA	NA	NA	NA	NA	NA	NA	NA	NA	NA	NA	NA	NA	NA	NA	NA	NA	NA	NA	NA	NA	NA	NA	NA	NA
1215	common	chr16	75657024	75657502	3.79998	2.2194	243	106	4	75657241	75657263	TGCATGCCGGGCCCTGTAGTTT	2.15e-07	6	1	ADAT1	-65	-	protein_coding	4.23419	4.38198	4.09845	4.14568	-0.240255	0.390442	NA	NA	NA	NA	NA	NA	NA	NA	NA	NA	NA	NA	NA	NA	NA	NA	NA	NA	NA	NA	NA	NA	NA	NA
1216	F80L absent	chr14	104993057	104994093	2.25263	1.08115	101	56	NA	NA	NA	NA	NA	NA	0	NA	NA	NA	NA	NA	NA	NA	NA	NA	NA	NA	NA	NA	NA	NA	NA	NA	NA	NA	NA	NA	NA	NA	NA	NA	NA	NA	NA	NA	NA	NA	NA	NA	NA
1217	common	chr2	99952792	99953187	3.62991	2.53924	206	83	1	99952986	99953008	AGCATTGTGGGAGTTGCAGTTT	8.76e-09	43	0	NA	NA	NA	NA	NA	NA	NA	NA	NA	NA	NA	NA	NA	NA	NA	NA	NA	NA	NA	NA	NA	NA	NA	NA	NA	NA	NA	NA	NA	NA	NA	NA	NA	NA
1218	common	chr1	151584153	151584671	5.51532	3.5969	964	348	4	151584455	151584477	GGCCTCCTGGGAGATGTAGTTT	2.53e-11	8	1	SNX27	129	+	protein_coding	4.18507	4.30743	4.72301	4.79597	0.417646	0.000513857	NA	NA	NA	NA	NA	NA	NA	NA	NA	NA	NA	NA	NA	NA	NA	NA	NA	NA	NA	NA	NA	NA	NA	NA
1219	common	chr15	25773266	25773546	2.24239	-0.16218	72	14	1	25773227	25773249	GTGATGCTGGAGGTGGTGGAGT	0.000586	70	0	NA	NA	NA	NA	NA	NA	NA	NA	NA	NA	NA	NA	NA	NA	NA	NA	NA	NA	NA	NA	NA	NA	NA	NA	NA	NA	NA	NA	NA	NA	NA	NA	NA	NA
1220	common	chr18	9913343	9913847	4.26198	3.11752	418	195	4	9913563	9913585	TGCTTGCTGGGAACTGTAGTAA	1.1e-07	25	1	VAPA	404	+	protein_coding	6.46891	6.48478	6.75529	6.77834	0.137957	0.407684	NA	NA	NA	NA	NA	NA	NA	NA	NA	NA	NA	NA	NA	NA	NA	NA	NA	NA	NA	NA	NA	NA	NA	NA
1221	F80L only	chr12	130871055	130872241	1.89123	-0.200209	47	15	2	130871012	130871034	TGGAGACAGGAAGGGGTAGTGT	0.000425	90	0	NA	NA	NA	NA	NA	NA	NA	NA	NA	NA	NA	NA	NA	NA	NA	NA	NA	NA	NA	NA	NA	NA	NA	NA	NA	NA	NA	NA	NA	NA	NA	NA	NA	NA
1222	common	chr8	142952988	142953804	2.18478	0.479015	129	52	2	142953345	142953367	GGGCAGGTGAGGGTGGTGGTGG	0.000957	56	0	NA	NA	NA	NA	NA	NA	NA	NA	NA	NA	NA	NA	NA	NA	NA	NA	NA	NA	NA	NA	NA	NA	NA	NA	NA	NA	NA	NA	NA	NA	NA	NA	NA	NA
1223	F80L absent	chr2	6909289	6910079	2.27318	1.00271	98	40	NA	NA	NA	NA	NA	NA	0	NA	NA	NA	NA	NA	NA	NA	NA	NA	NA	NA	NA	NA	NA	NA	NA	NA	NA	NA	NA	NA	NA	NA	NA	NA	NA	NA	NA	NA	NA	NA	NA	NA	NA
1224	common	chr7	120590451	120590913	4.59686	3.51629	301	117	4	120590617	120590639	TGGCGCCCGGTATTCGTAGTTT	1.05e-05	26	1	ING3	121	+	protein_coding	4.7761	4.72792	4.70984	4.76394	-0.038534	0.902279	NA	NA	NA	NA	NA	NA	NA	NA	NA	NA	NA	NA	NA	NA	NA	NA	NA	NA	NA	NA	NA	NA	NA	NA
1225	common	chr12	51477294	51477694	4.94595	2.67192	397	149	2	51477439	51477461	GGCTGGCTGGGAAATGGAGTCT	2.76e-08	21	1	CSRNP2	-47	-	protein_coding	2.39506	2.33914	2.82985	2.63227	0.22006	0.434258	NA	NA	NA	NA	NA	NA	NA	NA	NA	NA	NA	NA	NA	NA	NA	NA	NA	NA	NA	NA	NA	NA	NA	NA
1226	common	chr7	21466723	21467270	3.93897	2.69183	462	185	3	21466998	21467020	AGGCTGTCGGTACTCGTAGTTT	6.72e-06	11	0	NA	NA	NA	NA	NA	NA	NA	NA	NA	NA	NA	NA	NA	NA	NA	NA	NA	NA	NA	NA	NA	NA	NA	NA	NA	NA	NA	NA	NA	NA	NA	NA	NA	NA
1227	common	chr19	51142235	51142864	4.45538	3.50055	812	314	4	51142556	51142578	GACCTGCCGGGAATTGTAGTCT	7.76e-09	7	0	NA	NA	NA	NA	NA	NA	NA	NA	NA	NA	NA	NA	NA	NA	NA	NA	NA	NA	NA	NA	NA	NA	NA	NA	NA	NA	NA	NA	NA	NA	NA	NA	NA	NA
1228	F80L absent	chr9	99637964	99638353	1.98726	1.87206	75	36	6	99638190	99638212	CACACTCTAGGAAAGGGTCTTC	0.000693	13	1	ZNF782	-253	-	protein_coding	1.8953	2.01792	2.20477	2.50843	0.364323	0.312524	NA	NA	NA	NA	NA	NA	NA	NA	NA	NA	NA	NA	NA	NA	NA	NA	NA	NA	NA	NA	NA	NA	NA	NA
1229	F80L absent	chr8	142982077	142983083	2.43666	0.501677	104	41	1	142982492	142982514	TGTGTTGTGGGCATGTTGGTGT	0.000586	2	0	NA	NA	NA	NA	NA	NA	NA	NA	NA	NA	NA	NA	NA	NA	NA	NA	NA	NA	NA	NA	NA	NA	NA	NA	NA	NA	NA	NA	NA	NA	NA	NA	NA	NA
1230	F80L absent	chr8	58162190	58162421	2.55759	2.16099	29	17	NA	NA	NA	NA	NA	NA	0	NA	NA	NA	NA	NA	NA	NA	NA	NA	NA	NA	NA	NA	NA	NA	NA	NA	NA	NA	NA	NA	NA	NA	NA	NA	NA	NA	NA	NA	NA	NA	NA	NA	NA
1231	F80L absent	chr10	2563371	2564770	1.27302	0.137504	73	41	NA	NA	NA	NA	NA	NA	0	NA	NA	NA	NA	NA	NA	NA	NA	NA	NA	NA	NA	NA	NA	NA	NA	NA	NA	NA	NA	NA	NA	NA	NA	NA	NA	NA	NA	NA	NA	NA	NA	NA	NA
1232	common	chr16	30933585	30935056	6.02975	4.62496	4279	1903	13	30934017	30934039	TGCGACATGGGATGTGTAGTCC	8.07e-07	45	2	FBXL19-AS1	270	-	antisense	1.22033	1.40599	3.32193	3.21723	1.93088	3.86089e-30	FBXL19	56	+	protein_coding	4.81558	3.70377	4.01436	3.51854	-0.52064	0.256194	NA	NA	NA	NA	NA	NA	NA	NA	NA	NA	NA	NA	NA	NA
1233	common	chr6	38670830	38671229	3.86942	2.29418	186	99	4	38671044	38671066	GGCTCCTTGGGAGTTGTAGTCT	8.5e-09	85	1	GLO1	-112	-	protein_coding	7.94679	8.03199	8.00253	7.92861	-0.0493545	0.794619	NA	NA	NA	NA	NA	NA	NA	NA	NA	NA	NA	NA	NA	NA	NA	NA	NA	NA	NA	NA	NA	NA	NA	NA
1234	common	chr3	49967073	49967566	3.75756	2.7035	400	151	4	49967314	49967336	TGCATTGTGGGAAATGTAGTCC	9.93e-11	17	1	MON1A	287	-	protein_coding	2.97269	2.72247	2.72901	2.69822	-0.164586	0.735355	NA	NA	NA	NA	NA	NA	NA	NA	NA	NA	NA	NA	NA	NA	NA	NA	NA	NA	NA	NA	NA	NA	NA	NA
1235	common	chr2	54950307	54950868	3.91035	2.87494	545	219	6	54950595	54950617	CGCATCCTGGGAAGTGTAGTCC	1.09e-09	27	1	EML6	49	+	protein_coding	1.58976	0.933573	1.07724	0.815575	-0.149849	0.691424	NA	NA	NA	NA	NA	NA	NA	NA	NA	NA	NA	NA	NA	NA	NA	NA	NA	NA	NA	NA	NA	NA	NA	NA
1236	F80L absent	chr6	167582941	167583509	2.70287	1.32104	116	51	5	167583139	167583161	TGAGGTGTGTGAGAGGTTGTGT	0.000957	126	0	NA	NA	NA	NA	NA	NA	NA	NA	NA	NA	NA	NA	NA	NA	NA	NA	NA	NA	NA	NA	NA	NA	NA	NA	NA	NA	NA	NA	NA	NA	NA	NA	NA	NA
1237	common	chr1	40997095	40997483	3.01995	2.57715	125	79	4	40997226	40997248	GGCCTTATGGGAAATGTGGTCT	1.91e-09	12	1	ZNF684	-56	+	protein_coding	2.19849	2.58736	3.28392	3.21568	0.781812	0.00290411	NA	NA	NA	NA	NA	NA	NA	NA	NA	NA	NA	NA	NA	NA	NA	NA	NA	NA	NA	NA	NA	NA	NA	NA
1238	F80L absent	chr15	26002904	26003931	2.20153	1.01253	106	73	NA	NA	NA	NA	NA	NA	0	NA	NA	NA	NA	NA	NA	NA	NA	NA	NA	NA	NA	NA	NA	NA	NA	NA	NA	NA	NA	NA	NA	NA	NA	NA	NA	NA	NA	NA	NA	NA	NA	NA	NA
1239	F80L absent	chrX	105611976	105612258	3.49151	1.13795	29	10	NA	NA	NA	NA	NA	NA	0	NA	NA	NA	NA	NA	NA	NA	NA	NA	NA	NA	NA	NA	NA	NA	NA	NA	NA	NA	NA	NA	NA	NA	NA	NA	NA	NA	NA	NA	NA	NA	NA	NA	NA
1240	common	chr11	3078519	3079016	4.42598	2.53376	446	186	4	3078752	3078774	AGCATGCTGGGAGCTGTAGTTC	8.06e-11	9	1	CARS	76	-	protein_coding	4.31542	4.24945	4.48285	4.27724	0.0852271	0.755195	NA	NA	NA	NA	NA	NA	NA	NA	NA	NA	NA	NA	NA	NA	NA	NA	NA	NA	NA	NA	NA	NA	NA	NA
1241	common	chr1	36614916	36615443	4.51439	3.71517	961	353	5	36615173	36615195	GGGCTGTTGGGTGTTGTAGTCT	1.37e-08	10	1	TRAPPC3	-81	-	protein_coding	5.79701	5.83491	6.19712	6.1918	0.386792	0.00405242	NA	NA	NA	NA	NA	NA	NA	NA	NA	NA	NA	NA	NA	NA	NA	NA	NA	NA	NA	NA	NA	NA	NA	NA
1242	F80L absent	chr6	166692726	166693061	3.09909	0.535159	34	16	NA	NA	NA	NA	NA	NA	0	NA	NA	NA	NA	NA	NA	NA	NA	NA	NA	NA	NA	NA	NA	NA	NA	NA	NA	NA	NA	NA	NA	NA	NA	NA	NA	NA	NA	NA	NA	NA	NA	NA	NA
1243	F80L absent	chr7	157564460	157565118	2.18788	1.18379	69	47	NA	NA	NA	NA	NA	NA	0	NA	NA	NA	NA	NA	NA	NA	NA	NA	NA	NA	NA	NA	NA	NA	NA	NA	NA	NA	NA	NA	NA	NA	NA	NA	NA	NA	NA	NA	NA	NA	NA	NA	NA
1244	common	chr14	35591498	35591921	3.86755	2.59676	262	94	3	35591740	35591762	TGCATCGTGGGCACTGTAGTTT	1.01e-07	10	2	PPP2R3C	14	-	protein_coding	4.66391	4.66789	4.56621	4.39643	-0.211436	0.350087	KIAA0391	46	+	protein_coding	0.505891	1.18903	1.7866	1.3505	0.666428	0.202846	NA	NA	NA	NA	NA	NA	NA	NA	NA	NA	NA	NA	NA	NA
1245	F80L absent	chr21	47467313	47468776	1.34412	0.0271497	119	39	NA	NA	NA	NA	NA	NA	0	NA	NA	NA	NA	NA	NA	NA	NA	NA	NA	NA	NA	NA	NA	NA	NA	NA	NA	NA	NA	NA	NA	NA	NA	NA	NA	NA	NA	NA	NA	NA	NA	NA	NA
1246	F80L absent	chr2	16253293	16253888	1.79179	1.03231	77	41	NA	NA	NA	NA	NA	NA	0	NA	NA	NA	NA	NA	NA	NA	NA	NA	NA	NA	NA	NA	NA	NA	NA	NA	NA	NA	NA	NA	NA	NA	NA	NA	NA	NA	NA	NA	NA	NA	NA	NA	NA
1247	F80L absent	chr5	2255855	2256540	1.58962	0.46116	80	37	NA	NA	NA	NA	NA	NA	0	NA	NA	NA	NA	NA	NA	NA	NA	NA	NA	NA	NA	NA	NA	NA	NA	NA	NA	NA	NA	NA	NA	NA	NA	NA	NA	NA	NA	NA	NA	NA	NA	NA	NA
1248	common	chr9	131102464	131102815	4.086	2.40881	311	132	2	131102723	131102745	GGCACGCTGGGAGTTGTAGTCC	1.61e-11	27	1	SLC27A4	286	+	protein_coding	4.42559	3.9991	3.99639	3.66676	-0.410545	0.166001	NA	NA	NA	NA	NA	NA	NA	NA	NA	NA	NA	NA	NA	NA	NA	NA	NA	NA	NA	NA	NA	NA	NA	NA
1249	common	chr17	18128457	18128833	4.51466	3.06389	471	195	1	18128686	18128708	GGCCTGCCGGGACTTGTAGTCC	4.91e-10	8	1	LLGL1	256	+	protein_coding	4.63169	3.85898	4.13586	3.65535	-0.384645	0.387793	NA	NA	NA	NA	NA	NA	NA	NA	NA	NA	NA	NA	NA	NA	NA	NA	NA	NA	NA	NA	NA	NA	NA	NA
1250	common	chr13	26827718	26828411	4.55268	3.53476	860	398	3	26828015	26828037	TGCATTCTGGGTATTGTAGTCT	2.15e-10	30	1	CDK8	212	+	protein_coding	5.04308	5.17792	5.47768	5.31832	0.249417	0.180578	NA	NA	NA	NA	NA	NA	NA	NA	NA	NA	NA	NA	NA	NA	NA	NA	NA	NA	NA	NA	NA	NA	NA	NA
1251	common	chr10	74113969	74114762	4.37092	2.70872	715	312	5	74114367	74114389	TGGCTGCTGGGAGGCGTAGTTT	5.22e-09	7	1	DNAJB12	623	-	protein_coding	4.29278	4.06781	4.28836	4.2765	0.0289875	0.929171	NA	NA	NA	NA	NA	NA	NA	NA	NA	NA	NA	NA	NA	NA	NA	NA	NA	NA	NA	NA	NA	NA	NA	NA
1252	F80L absent	chr2	220577851	220578181	3.64159	3.28708	38	29	NA	NA	NA	NA	NA	NA	0	NA	NA	NA	NA	NA	NA	NA	NA	NA	NA	NA	NA	NA	NA	NA	NA	NA	NA	NA	NA	NA	NA	NA	NA	NA	NA	NA	NA	NA	NA	NA	NA	NA	NA
1253	common	chr18	60382088	60382571	3.9532	3.01452	256	107	4	60382327	60382349	TAAACCTTGGGAGTTGTGGTTC	1.79e-06	4	1	PHLPP1	343	+	protein_coding	3.0321	3.61941	3.68032	3.88655	0.139453	0.548443	NA	NA	NA	NA	NA	NA	NA	NA	NA	NA	NA	NA	NA	NA	NA	NA	NA	NA	NA	NA	NA	NA	NA	NA
1254	F80L absent	chr10	133183728	133184932	1.98399	0.655248	91	40	NA	NA	NA	NA	NA	NA	0	NA	NA	NA	NA	NA	NA	NA	NA	NA	NA	NA	NA	NA	NA	NA	NA	NA	NA	NA	NA	NA	NA	NA	NA	NA	NA	NA	NA	NA	NA	NA	NA	NA	NA
1255	common	chr17	7118201	7118710	4.8147	3.08217	448	199	6	7118450	7118472	AACATTGAGGGATCTGGTGCCT	0.000931	9	0	NA	NA	NA	NA	NA	NA	NA	NA	NA	NA	NA	NA	NA	NA	NA	NA	NA	NA	NA	NA	NA	NA	NA	NA	NA	NA	NA	NA	NA	NA	NA	NA	NA	NA
1256	common	chr1	6673469	6674041	6.11449	4.24536	1777	634	3	6673679	6673701	TGCCTTGTGGGAGTGGTAGTCC	2.22e-09	21	1	PHF13	-10	+	protein_coding	3.09761	3.02148	3.22651	2.91648	-0.00823297	0.984205	NA	NA	NA	NA	NA	NA	NA	NA	NA	NA	NA	NA	NA	NA	NA	NA	NA	NA	NA	NA	NA	NA	NA	NA
1257	common	chr11	77899504	77900057	4.55347	3.27611	829	300	5	77899787	77899809	TGCCTCCTGGGAGATGGAGTTC	6.01e-10	17	2	KCTD21	88	-	ND	ND	ND	ND	ND	ND	ND	USP35	78	+	ND	ND	ND	ND	ND	ND	ND	NA	NA	NA	NA	NA	NA	NA	NA	NA	NA	NA	NA	NA	NA
1258	F80L absent	chr2	240564210	240564743	2.84997	0.851166	62	53	4	240564635	240564657	GGGTATGTGGGTCTTGTATGGT	0.00036	42	0	NA	NA	NA	NA	NA	NA	NA	NA	NA	NA	NA	NA	NA	NA	NA	NA	NA	NA	NA	NA	NA	NA	NA	NA	NA	NA	NA	NA	NA	NA	NA	NA	NA	NA
1259	common	chr7	150754778	150755464	4.56639	4.33087	843	393	7	150755111	150755133	AGACGGCTGGGGGTTGTAGTCT	9.75e-08	33	1	CDK5	496	-	protein_coding	4.45418	4.29939	4.16672	4.43763	-0.186418	0.554203	NA	NA	NA	NA	NA	NA	NA	NA	NA	NA	NA	NA	NA	NA	NA	NA	NA	NA	NA	NA	NA	NA	NA	NA
1260	common	chr13	103451124	103451754	4.11847	2.5367	607	245	2	103451451	103451473	GGCTCCCTGGGATATGTAGTTC	2.55e-09	10	2	KDELC1	-82	-	protein_coding	4.76235	4.75114	4.42492	4.31687	-0.453647	0.00120009	BIVM	-40	+	protein_coding	5.02015	5.08364	5.10476	4.8953	-0.179105	0.362984	NA	NA	NA	NA	NA	NA	NA	NA	NA	NA	NA	NA	NA	NA
1261	F80L absent	chr22	39959325	39960197	1.91716	0.670583	96	37	NA	NA	NA	NA	NA	NA	0	NA	NA	NA	NA	NA	NA	NA	NA	NA	NA	NA	NA	NA	NA	NA	NA	NA	NA	NA	NA	NA	NA	NA	NA	NA	NA	NA	NA	NA	NA	NA	NA	NA	NA
1262	common	chr1	107598907	107599535	4.30556	2.88133	652	239	2	107599252	107599274	GGGCTTCTGGGACTTGTAGTGC	1.16e-09	4	1	PRMT6	46	+	protein_coding	4.51791	4.28244	4.18507	4.09424	-0.288654	0.170252	NA	NA	NA	NA	NA	NA	NA	NA	NA	NA	NA	NA	NA	NA	NA	NA	NA	NA	NA	NA	NA	NA	NA	NA
1263	common	chr12	22198868	22199390	4.32803	2.91597	381	155	3	22199074	22199096	TGCTCGCTGGGAATTGTAGTCC	2.6e-10	25	1	CMAS	-21	+	protein_coding	5.14934	5.09972	5.16872	5.21451	0.0298487	0.921253	NA	NA	NA	NA	NA	NA	NA	NA	NA	NA	NA	NA	NA	NA	NA	NA	NA	NA	NA	NA	NA	NA	NA	NA
1264	F80L absent	chr19	38269849	38270541	2.6094	1.54542	133	60	6	38270284	38270306	TGGCTTGTGGGAAAAGTGGCTC	1.79e-06	1	1	CTD-2554C21.1	131	+	ND	ND	ND	ND	ND	ND	ND	NA	NA	NA	NA	NA	NA	NA	NA	NA	NA	NA	NA	NA	NA	NA	NA	NA	NA	NA	NA	NA	NA	NA	NA
1265	F80L absent	chr6	157703951	157704468	0.113673	-0.176553	140	87	NA	NA	NA	NA	NA	NA	0	NA	NA	NA	NA	NA	NA	NA	NA	NA	NA	NA	NA	NA	NA	NA	NA	NA	NA	NA	NA	NA	NA	NA	NA	NA	NA	NA	NA	NA	NA	NA	NA	NA	NA
1266	F80L absent	chr17	60870031	60870269	0.7392	-0.12722	45	41	NA	NA	NA	NA	NA	NA	0	NA	NA	NA	NA	NA	NA	NA	NA	NA	NA	NA	NA	NA	NA	NA	NA	NA	NA	NA	NA	NA	NA	NA	NA	NA	NA	NA	NA	NA	NA	NA	NA	NA	NA
1267	common	chr10	103892416	103893033	4.93028	4.12117	975	432	5	103892735	103892757	TGTCATTCGGGAGTTGTAGTTC	3.16e-07	11	1	PPRC1	63	+	protein_coding	4.08916	4.28244	4.28614	4.21179	0.0238986	0.932244	NA	NA	NA	NA	NA	NA	NA	NA	NA	NA	NA	NA	NA	NA	NA	NA	NA	NA	NA	NA	NA	NA	NA	NA
1268	common	chr12	49245689	49246311	5.97051	4.77877	1325	604	6	49245973	49245995	GGCAAGCTGGGAAGGCGAGTTC	1.88e-06	19	0	NA	NA	NA	NA	NA	NA	NA	NA	NA	NA	NA	NA	NA	NA	NA	NA	NA	NA	NA	NA	NA	NA	NA	NA	NA	NA	NA	NA	NA	NA	NA	NA	NA	NA
1269	F80L absent	chr21	44090414	44090845	2.41376	0.768557	56	32	2	44090750	44090772	GTATGTGTGTGAATGATAGTTT	0.000902	14	0	NA	NA	NA	NA	NA	NA	NA	NA	NA	NA	NA	NA	NA	NA	NA	NA	NA	NA	NA	NA	NA	NA	NA	NA	NA	NA	NA	NA	NA	NA	NA	NA	NA	NA
1270	common	chr6	30687696	30688145	3.23423	2.47131	179	87	2	30687916	30687938	TCCTCTTTGGGAGTTGTAGTCC	9.69e-08	24	1	TUBB	58	+	protein_coding	9.19557	9.12456	9.08454	9.09532	-0.0943071	0.518319	NA	NA	NA	NA	NA	NA	NA	NA	NA	NA	NA	NA	NA	NA	NA	NA	NA	NA	NA	NA	NA	NA	NA	NA
1271	common	chr19	17530529	17531162	4.47413	3.17107	868	348	3	17530840	17530862	GGCCTTCTGGGAGTTGTAGTTC	6.35e-13	40	1	CTD-2521M24.8	-262	-	ND	ND	ND	ND	ND	ND	ND	NA	NA	NA	NA	NA	NA	NA	NA	NA	NA	NA	NA	NA	NA	NA	NA	NA	NA	NA	NA	NA	NA	NA	NA
1272	common	chr7	134001342	134002103	4.48887	3.51819	635	263	3	134001743	134001765	GGCATCCTGGGACATGTAGTCT	1.76e-10	18	1	SLC35B4	81	-	protein_coding	4.42358	4.24793	4.24565	4.45615	-0.0293816	0.906912	NA	NA	NA	NA	NA	NA	NA	NA	NA	NA	NA	NA	NA	NA	NA	NA	NA	NA	NA	NA	NA	NA	NA	NA
1273	common	chr19	44488062	44488522	4.37607	3.39455	278	128	5	44488263	44488285	GGAGTCGTGGGAACTTTGGCTC	7.12e-05	2	0	NA	NA	NA	NA	NA	NA	NA	NA	NA	NA	NA	NA	NA	NA	NA	NA	NA	NA	NA	NA	NA	NA	NA	NA	NA	NA	NA	NA	NA	NA	NA	NA	NA	NA
1274	common	chr20	20693310	20693848	4.4924	2.75788	296	119	5	20693584	20693606	GGCACGATGGGAGTCAGTGGGC	0.00011	13	1	RALGAPA2	-448	-	protein_coding	2.99095	2.5509	2.87774	2.89918	0.292315	0.126503	NA	NA	NA	NA	NA	NA	NA	NA	NA	NA	NA	NA	NA	NA	NA	NA	NA	NA	NA	NA	NA	NA	NA	NA
1275	F80L absent	chr16	86667914	86668218	2.56512	1.56911	15	6	NA	NA	NA	NA	NA	NA	0	NA	NA	NA	NA	NA	NA	NA	NA	NA	NA	NA	NA	NA	NA	NA	NA	NA	NA	NA	NA	NA	NA	NA	NA	NA	NA	NA	NA	NA	NA	NA	NA	NA	NA
1276	common	chr19	3035904	3036486	3.96187	2.71308	459	216	4	3036256	3036278	GAGCTTCTGGGAATCGTAGTCT	1.86e-08	21	0	NA	NA	NA	NA	NA	NA	NA	NA	NA	NA	NA	NA	NA	NA	NA	NA	NA	NA	NA	NA	NA	NA	NA	NA	NA	NA	NA	NA	NA	NA	NA	NA	NA	NA
1277	common	chr7	23636720	23637141	3.92483	2.65311	394	167	3	23636932	23636954	GGCATTGTGGGGGATGTAGTCC	2.86e-09	3	1	CCDC126	68	+	protein_coding	3.03034	3.27501	3.29425	3.25399	0.203994	0.61508	NA	NA	NA	NA	NA	NA	NA	NA	NA	NA	NA	NA	NA	NA	NA	NA	NA	NA	NA	NA	NA	NA	NA	NA
1278	common	chr19	46233948	46234464	4.61681	2.58043	686	265	7	46234192	46234214	AGCCCGCTGGGAATTGAAGTCC	1.53e-09	15	1	FBXO46	-44	-	protein_coding	3.25248	3.06695	3.8885	3.61471	0.28686	0.408621	NA	NA	NA	NA	NA	NA	NA	NA	NA	NA	NA	NA	NA	NA	NA	NA	NA	NA	NA	NA	NA	NA	NA	NA
1279	common	chr2	73053050	73053455	3.90798	2.90851	207	94	3	73053221	73053243	TGTCCGCTGGGATTTGTAGTTC	3.89e-09	37	1	EXOC6B	-82	-	protein_coding	3.2555	3.39232	2.9279	3.37016	-0.227847	0.339331	NA	NA	NA	NA	NA	NA	NA	NA	NA	NA	NA	NA	NA	NA	NA	NA	NA	NA	NA	NA	NA	NA	NA	NA
1280	F80L absent	chr9	136360587	136361211	2.00331	0.766154	103	52	1	136360461	136360483	GGGCCCCTGGGGCTTCTTGCTA	0.00014	173	0	NA	NA	NA	NA	NA	NA	NA	NA	NA	NA	NA	NA	NA	NA	NA	NA	NA	NA	NA	NA	NA	NA	NA	NA	NA	NA	NA	NA	NA	NA	NA	NA	NA	NA
1281	common	chr17	30771123	30771679	5.02734	3.47061	1024	422	3	30771409	30771431	AGCACTCCGGGAGTTGTAGTCT	4.81e-10	20	1	PSMD11	-122	+	protein_coding	6.41616	6.49313	6.54628	6.46434	0.0691909	0.755831	NA	NA	NA	NA	NA	NA	NA	NA	NA	NA	NA	NA	NA	NA	NA	NA	NA	NA	NA	NA	NA	NA	NA	NA
1282	common	chr11	64038140	64039131	5.71144	4.37168	2239	920	8	64038501	64038523	GGCATGCTGGGATCTGTAGTCT	3.27e-10	9	0	NA	NA	NA	NA	NA	NA	NA	NA	NA	NA	NA	NA	NA	NA	NA	NA	NA	NA	NA	NA	NA	NA	NA	NA	NA	NA	NA	NA	NA	NA	NA	NA	NA	NA
1283	common	chr16	686160	686728	4.63553	3.15527	782	339	4	686361	686383	GGCACGTCGGGAGCTGTAGTCC	2.31e-08	4	1	C16orf13	-86	-	protein_coding	5.60851	5.01302	4.68089	4.68145	-0.584081	0.0710089	NA	NA	NA	NA	NA	NA	NA	NA	NA	NA	NA	NA	NA	NA	NA	NA	NA	NA	NA	NA	NA	NA	NA	NA
1284	F80L absent	chr10	50461811	50462621	2.30384	1.13903	106	56	NA	NA	NA	NA	NA	NA	0	NA	NA	NA	NA	NA	NA	NA	NA	NA	NA	NA	NA	NA	NA	NA	NA	NA	NA	NA	NA	NA	NA	NA	NA	NA	NA	NA	NA	NA	NA	NA	NA	NA	NA
1285	F80L absent	chr2	23645124	23645643	2.13102	1.27486	57	34	1	23645292	23645314	GTGCCTGTGTGTGTTGTATGTT	0.000836	5	0	NA	NA	NA	NA	NA	NA	NA	NA	NA	NA	NA	NA	NA	NA	NA	NA	NA	NA	NA	NA	NA	NA	NA	NA	NA	NA	NA	NA	NA	NA	NA	NA	NA	NA
1286	F80L absent	chr13	114561361	114561831	1.92642	1.27901	36	14	NA	NA	NA	NA	NA	NA	0	NA	NA	NA	NA	NA	NA	NA	NA	NA	NA	NA	NA	NA	NA	NA	NA	NA	NA	NA	NA	NA	NA	NA	NA	NA	NA	NA	NA	NA	NA	NA	NA	NA	NA
1287	common	chr19	56826083	56826691	3.94348	2.25418	303	147	5	56826284	56826306	AGGCTTCTGGGAATTCTAGTTC	1.19e-09	42	1	AC006116.17	-315	+	ND	ND	ND	ND	ND	ND	ND	NA	NA	NA	NA	NA	NA	NA	NA	NA	NA	NA	NA	NA	NA	NA	NA	NA	NA	NA	NA	NA	NA	NA	NA
1288	common	chr6	42531404	42531920	4.84253	3.31719	344	156	4	42531612	42531634	TGCATTGTGGGAGTTGTAGTCC	7.11e-11	2	1	UBR2	138	+	protein_coding	3.6837	3.66221	4.18745	3.99277	0.341564	0.0132505	NA	NA	NA	NA	NA	NA	NA	NA	NA	NA	NA	NA	NA	NA	NA	NA	NA	NA	NA	NA	NA	NA	NA	NA
1289	common	chr10	38382999	38383488	4.55169	2.95166	368	180	6	38383254	38383276	GGACTTGTGGGAGATGTAGTGT	1.53e-08	8	1	ZNF37A	21	+	protein_coding	4.34625	4.28762	5.07339	5.03606	0.703432	1.53344e-15	NA	NA	NA	NA	NA	NA	NA	NA	NA	NA	NA	NA	NA	NA	NA	NA	NA	NA	NA	NA	NA	NA	NA	NA
1290	F80L absent	chr13	21292918	21293621	2.16768	0.74896	83	30	NA	NA	NA	NA	NA	NA	0	NA	NA	NA	NA	NA	NA	NA	NA	NA	NA	NA	NA	NA	NA	NA	NA	NA	NA	NA	NA	NA	NA	NA	NA	NA	NA	NA	NA	NA	NA	NA	NA	NA	NA
1291	common	chr20	47804874	47805631	4.97265	3.59058	984	409	2	47805101	47805123	GGCCTGCCGGGAGTTGTAGTTC	5.9e-11	58	1	STAU1	-348	-	protein_coding	5.04571	5.15015	5.30597	5.41954	0.24429	0.152744	NA	NA	NA	NA	NA	NA	NA	NA	NA	NA	NA	NA	NA	NA	NA	NA	NA	NA	NA	NA	NA	NA	NA	NA
1292	F80L absent	chr2	5273488	5273954	1.83975	1.20266	55	36	NA	NA	NA	NA	NA	NA	0	NA	NA	NA	NA	NA	NA	NA	NA	NA	NA	NA	NA	NA	NA	NA	NA	NA	NA	NA	NA	NA	NA	NA	NA	NA	NA	NA	NA	NA	NA	NA	NA	NA	NA
1293	F80L absent	chr1	228126004	228126360	1.61128	0.422557	44	24	NA	NA	NA	NA	NA	NA	0	NA	NA	NA	NA	NA	NA	NA	NA	NA	NA	NA	NA	NA	NA	NA	NA	NA	NA	NA	NA	NA	NA	NA	NA	NA	NA	NA	NA	NA	NA	NA	NA	NA	NA
1294	common	chr17	5372164	5372645	3.93727	1.89911	452	181	2	5372337	5372359	GGCATGCTGGGAGATGCAGTCC	1e-09	17	2	DHX33	-24	-	protein_coding	3.87774	3.93263	3.80116	4.0018	-0.0360883	0.913648	CTC-524C5.5	8	+	ND	ND	ND	ND	ND	ND	ND	NA	NA	NA	NA	NA	NA	NA	NA	NA	NA	NA	NA	NA	NA
1295	common	chr9	15422464	15423082	4.72061	3.84672	948	385	3	15422733	15422755	GGCCTGCCGGGAAATGTAGTTT	1.26e-10	23	1	SNAPC3	-71	+	protein_coding	4.45483	4.66334	4.73715	4.61471	0.0144962	0.963009	NA	NA	NA	NA	NA	NA	NA	NA	NA	NA	NA	NA	NA	NA	NA	NA	NA	NA	NA	NA	NA	NA	NA	NA
1296	common	chr8	119634025	119634687	5.04406	3.33805	674	293	2	119634229	119634251	GGCGTCCTGGGAAGTGTAGTTC	1.15e-09	6	1	SAMD12	-122	-	protein_coding	1.66448	1.3505	1.01436	0.948601	-0.00772477	0.986865	NA	NA	NA	NA	NA	NA	NA	NA	NA	NA	NA	NA	NA	NA	NA	NA	NA	NA	NA	NA	NA	NA	NA	NA
1297	common	chr14	102430515	102430830	3.52154	1.91474	125	54	2	102430727	102430749	GCCCTTCTGGGACTTGTAGTCT	2.68e-09	26	1	DYNC1H1	193	+	protein_coding	5.81788	5.374	5.10266	5.19061	-0.558519	0.0149991	NA	NA	NA	NA	NA	NA	NA	NA	NA	NA	NA	NA	NA	NA	NA	NA	NA	NA	NA	NA	NA	NA	NA	NA
1298	F80L absent	chr13	31417461	31417971	1.5326	0.451391	82	47	NA	NA	NA	NA	NA	NA	0	NA	NA	NA	NA	NA	NA	NA	NA	NA	NA	NA	NA	NA	NA	NA	NA	NA	NA	NA	NA	NA	NA	NA	NA	NA	NA	NA	NA	NA	NA	NA	NA	NA	NA
1299	common	chr9	35646570	35647130	4.01634	3.0191	425	202	4	35646849	35646871	GGCATCCCGGGAGTTGTAGTCT	1.8e-10	15	1	CD72	-43	-	ND	ND	ND	ND	ND	ND	ND	NA	NA	NA	NA	NA	NA	NA	NA	NA	NA	NA	NA	NA	NA	NA	NA	NA	NA	NA	NA	NA	NA	NA	NA
1300	common	chr17	40075103	40075707	4.94224	3.59394	1256	550	5	40075381	40075403	GGCCTGCTGGGACTTGTAGTCC	3.47e-11	6	0	NA	NA	NA	NA	NA	NA	NA	NA	NA	NA	NA	NA	NA	NA	NA	NA	NA	NA	NA	NA	NA	NA	NA	NA	NA	NA	NA	NA	NA	NA	NA	NA	NA	NA
1301	common	chr16	19534841	19535314	4.15033	2.95188	257	148	4	19535134	19535156	TGCACCTCGGGGATGGTAGTGT	4.84e-06	10	1	CCP110	56	+	protein_coding	4.26903	4.35614	4.76924	4.68313	0.326581	0.00440128	NA	NA	NA	NA	NA	NA	NA	NA	NA	NA	NA	NA	NA	NA	NA	NA	NA	NA	NA	NA	NA	NA	NA	NA
1302	F80L absent	chr16	84982359	84983056	2.18207	0.536501	61	22	NA	NA	NA	NA	NA	NA	0	NA	NA	NA	NA	NA	NA	NA	NA	NA	NA	NA	NA	NA	NA	NA	NA	NA	NA	NA	NA	NA	NA	NA	NA	NA	NA	NA	NA	NA	NA	NA	NA	NA	NA
1303	common	chr2	1599289	1601660	1.82907	0.593177	224	89	1	1600288	1600310	TGCGTGCTGGTATCTGTGGTGT	1.14e-05	93	0	NA	NA	NA	NA	NA	NA	NA	NA	NA	NA	NA	NA	NA	NA	NA	NA	NA	NA	NA	NA	NA	NA	NA	NA	NA	NA	NA	NA	NA	NA	NA	NA	NA	NA
1304	common	chr1	10532391	10532880	4.63495	3.26198	415	186	6	10532596	10532618	AGCCTGCCGGGAGATGTAGTTC	2.65e-10	3	2	DFFA	-52	-	protein_coding	5.17911	5.08619	5.1375	5.04658	0.00361227	0.988606	PEX14	-290	+	protein_coding	3.1375	2.73552	3.03914	2.81558	-0.279423	0.603624	NA	NA	NA	NA	NA	NA	NA	NA	NA	NA	NA	NA	NA	NA
1305	F80L absent	chr13	25256010	25256281	1.14863	0.275952	41	26	NA	NA	NA	NA	NA	NA	0	NA	NA	NA	NA	NA	NA	NA	NA	NA	NA	NA	NA	NA	NA	NA	NA	NA	NA	NA	NA	NA	NA	NA	NA	NA	NA	NA	NA	NA	NA	NA	NA	NA	NA
1306	common	chr17	7122858	7123431	4.23229	3.48268	666	282	3	7123148	7123170	GGCATGCTGGGAGCTGTAGTTC	3.27e-11	10	1	DLG4	-123	-	protein_coding	0.632268	1.1177	1.79909	1.48027	0.643881	0.190149	NA	NA	NA	NA	NA	NA	NA	NA	NA	NA	NA	NA	NA	NA	NA	NA	NA	NA	NA	NA	NA	NA	NA	NA
1307	common	chr19	42463265	42463867	4.49958	3.543	809	344	6	42463554	42463576	GAGCAGCTGGGGACTGTAGTTC	1.79e-06	1	1	RABAC1	-24	-	protein_coding	4.67299	3.98914	3.73444	3.27798	-0.939584	0.034376	NA	NA	NA	NA	NA	NA	NA	NA	NA	NA	NA	NA	NA	NA	NA	NA	NA	NA	NA	NA	NA	NA	NA	NA
1308	common	chr7	140098076	140098619	4.65664	3.41165	611	244	3	140098360	140098382	GGCACGCTGGGAGTTGTAGTCC	1.61e-11	15	0	NA	NA	NA	NA	NA	NA	NA	NA	NA	NA	NA	NA	NA	NA	NA	NA	NA	NA	NA	NA	NA	NA	NA	NA	NA	NA	NA	NA	NA	NA	NA	NA	NA	NA
1309	F80L absent	chr4	189190095	189191072	0.694086	0.416243	129	78	NA	NA	NA	NA	NA	NA	0	NA	NA	NA	NA	NA	NA	NA	NA	NA	NA	NA	NA	NA	NA	NA	NA	NA	NA	NA	NA	NA	NA	NA	NA	NA	NA	NA	NA	NA	NA	NA	NA	NA	NA
1310	common	chr10	99205678	99206030	3.42535	2.72952	260	126	2	99205856	99205878	GGTAACCTGGGAAATGGAGTTT	1.09e-07	43	2	EXOSC1	-80	-	protein_coding	5.06437	5.1206	5.2407	5.28762	0.163299	0.54336	ZDHHC16	73	+	protein_coding	5.52074	5.50843	5.71039	5.74308	0.178832	0.335569	NA	NA	NA	NA	NA	NA	NA	NA	NA	NA	NA	NA	NA	NA
1311	common	chr11	73309090	73309879	4.90362	3.7905	917	392	3	73309291	73309313	GGCATGCCGGGAGTTGTGGTCC	1.21e-09	12	1	FAM168A	-250	-	protein_coding	3.63227	3.67807	4.10182	4.03386	0.350976	0.00368023	NA	NA	NA	NA	NA	NA	NA	NA	NA	NA	NA	NA	NA	NA	NA	NA	NA	NA	NA	NA	NA	NA	NA	NA
1312	F80L absent	chr18	76309187	76309766	2.10796	1.27436	58	30	NA	NA	NA	NA	NA	NA	0	NA	NA	NA	NA	NA	NA	NA	NA	NA	NA	NA	NA	NA	NA	NA	NA	NA	NA	NA	NA	NA	NA	NA	NA	NA	NA	NA	NA	NA	NA	NA	NA	NA	NA
1313	F80L absent	chr2	53994563	53995169	2.30013	1.1429	78	25	4	53994953	53994975	GCGCCGCCGGGGACTGAAGCCT	8.86e-05	14	1	CHAC2	63	+	protein_coding	4.32697	4.43696	4.13504	3.94486	-0.368637	0.125593	NA	NA	NA	NA	NA	NA	NA	NA	NA	NA	NA	NA	NA	NA	NA	NA	NA	NA	NA	NA	NA	NA	NA	NA
1314	F80L absent	chr13	24929851	24930913	2.10586	0.784016	104	49	NA	NA	NA	NA	NA	NA	0	NA	NA	NA	NA	NA	NA	NA	NA	NA	NA	NA	NA	NA	NA	NA	NA	NA	NA	NA	NA	NA	NA	NA	NA	NA	NA	NA	NA	NA	NA	NA	NA	NA	NA
1315	F80L absent	chr1	230530146	230530814	1.85915	0.942671	72	35	NA	NA	NA	NA	NA	NA	0	NA	NA	NA	NA	NA	NA	NA	NA	NA	NA	NA	NA	NA	NA	NA	NA	NA	NA	NA	NA	NA	NA	NA	NA	NA	NA	NA	NA	NA	NA	NA	NA	NA	NA
1316	common	chr11	82996846	82997600	4.85714	3.15906	675	310	4	82997100	82997122	GGAATGCTGGGAATTGTAGTTT	3.79e-11	9	2	RP11-727A23.10	-52	+	ND	ND	ND	ND	ND	ND	ND	CCDC90B	227	-	protein_coding	4.851	4.99548	4.9782	5.26529	0.1966	0.389673	NA	NA	NA	NA	NA	NA	NA	NA	NA	NA	NA	NA	NA	NA
1317	common	chr22	50776052	50776071	1.8635	0.718229	26	10	4	50776146	50776168	TGTACTGTGTGGTATGTAGTGT	7.33e-05	57	0	NA	NA	NA	NA	NA	NA	NA	NA	NA	NA	NA	NA	NA	NA	NA	NA	NA	NA	NA	NA	NA	NA	NA	NA	NA	NA	NA	NA	NA	NA	NA	NA	NA	NA
1318	F80L absent	chr2	216963436	216964051	2.64228	2.11077	76	55	2	216963612	216963634	ATGTATGTGGTATGTGTAGTGT	0.000427	56	0	NA	NA	NA	NA	NA	NA	NA	NA	NA	NA	NA	NA	NA	NA	NA	NA	NA	NA	NA	NA	NA	NA	NA	NA	NA	NA	NA	NA	NA	NA	NA	NA	NA	NA
1319	common	chr10	134228842	134229019	3.34618	1.17175	57	18	NA	NA	NA	NA	NA	NA	0	NA	NA	NA	NA	NA	NA	NA	NA	NA	NA	NA	NA	NA	NA	NA	NA	NA	NA	NA	NA	NA	NA	NA	NA	NA	NA	NA	NA	NA	NA	NA	NA	NA	NA
1320	common	chr10	103815808	103816231	4.07488	3.06853	320	132	3	103815971	103815993	GCCCCGCCGGGTCCTAAAGCCC	0.000691	23	1	C10orf76	-69	-	protein_coding	3.02857	2.86987	2.8953	3.05658	-0.0260953	0.951866	NA	NA	NA	NA	NA	NA	NA	NA	NA	NA	NA	NA	NA	NA	NA	NA	NA	NA	NA	NA	NA	NA	NA	NA
1321	common	chr10	94050634	94051154	3.49393	2.80054	583	261	3	94050851	94050873	AGCAGCCTGGGAGATGTAGTCT	2.09e-09	15	2	CPEB3	-50	-	ND	ND	ND	ND	ND	ND	ND	MARCH5	26	+	protein_coding	4.66391	4.89433	4.59694	4.67016	-0.170038	0.526128	NA	NA	NA	NA	NA	NA	NA	NA	NA	NA	NA	NA	NA	NA
1322	F80L absent	chr1	242910494	242910751	2.13092	0.730862	35	10	NA	NA	NA	NA	NA	NA	0	NA	NA	NA	NA	NA	NA	NA	NA	NA	NA	NA	NA	NA	NA	NA	NA	NA	NA	NA	NA	NA	NA	NA	NA	NA	NA	NA	NA	NA	NA	NA	NA	NA	NA
1323	common	chr11	61559939	61560482	4.88852	3.39131	600	251	4	61560181	61560203	GGCCTGCGGGGACCTGGTGTGG	5.45e-05	19	4	MIR611	-177	-	ND	ND	ND	ND	ND	ND	ND	FEN1	-101	+	protein_coding	6.45845	6.31179	6.26716	6.05897	-0.262869	0.0918046	TMEM258	64	-	protein_coding	6.63459	6.72642	6.40446	6.4266	-0.274892	0.146887	FADS2	242	+	protein_coding
1324	common	chr10	72288572	72288918	3.07449	2.78099	110	41	3	72288751	72288773	GGGAGGCTGGGAAATGTAGTCT	1.12e-09	1	0	NA	NA	NA	NA	NA	NA	NA	NA	NA	NA	NA	NA	NA	NA	NA	NA	NA	NA	NA	NA	NA	NA	NA	NA	NA	NA	NA	NA	NA	NA	NA	NA	NA	NA
1325	common	chr5	648771	650304	1.55518	0.476406	209	102	1	648864	648886	TGGACTGTGAGGTGTGGACTGT	0.000716	209	0	NA	NA	NA	NA	NA	NA	NA	NA	NA	NA	NA	NA	NA	NA	NA	NA	NA	NA	NA	NA	NA	NA	NA	NA	NA	NA	NA	NA	NA	NA	NA	NA	NA	NA
1326	F80L absent	chr1	48056893	48057678	2.27354	0.786631	93	54	5	48057007	48057029	GTGAGTCTGTGAGGTGAAGGTG	0.000438	16	0	NA	NA	NA	NA	NA	NA	NA	NA	NA	NA	NA	NA	NA	NA	NA	NA	NA	NA	NA	NA	NA	NA	NA	NA	NA	NA	NA	NA	NA	NA	NA	NA	NA	NA
1327	F80L absent	chr17	80544111	80544394	1.25072	-0.109265	111	48	NA	NA	NA	NA	NA	NA	0	NA	NA	NA	NA	NA	NA	NA	NA	NA	NA	NA	NA	NA	NA	NA	NA	NA	NA	NA	NA	NA	NA	NA	NA	NA	NA	NA	NA	NA	NA	NA	NA	NA	NA
1328	common	chr7	75988341	75988932	3.89057	2.88681	423	171	5	75988610	75988632	GGGCCCCTGGGAGTTGTAGTGT	3.39e-09	24	1	YWHAG	-288	-	protein_coding	6.12267	6.01547	6.21023	6.01592	0.0206587	0.937753	NA	NA	NA	NA	NA	NA	NA	NA	NA	NA	NA	NA	NA	NA	NA	NA	NA	NA	NA	NA	NA	NA	NA	NA
1329	common	chr16	75018994	75019496	2.82596	1.67028	215	81	3	75019208	75019230	GCTCTGCCGGGAGTTGTAGTCC	5.93e-08	5	0	NA	NA	NA	NA	NA	NA	NA	NA	NA	NA	NA	NA	NA	NA	NA	NA	NA	NA	NA	NA	NA	NA	NA	NA	NA	NA	NA	NA	NA	NA	NA	NA	NA	NA
1330	F80L absent	chr22	46375639	46376345	1.91299	1.01848	125	66	3	46375734	46375756	TGATTTCTGGTATGTGCTGTGT	0.000238	1	0	NA	NA	NA	NA	NA	NA	NA	NA	NA	NA	NA	NA	NA	NA	NA	NA	NA	NA	NA	NA	NA	NA	NA	NA	NA	NA	NA	NA	NA	NA	NA	NA	NA	NA
1331	common	chr10	104262289	104262902	4.16336	3.53089	516	296	6	104262532	104262554	AGCTTGCTGGGGATTGTAGTTC	2.14e-09	24	1	ACTR1A	-113	-	protein_coding	5.83036	5.89966	5.94767	5.83668	-0.0519559	0.791465	NA	NA	NA	NA	NA	NA	NA	NA	NA	NA	NA	NA	NA	NA	NA	NA	NA	NA	NA	NA	NA	NA	NA	NA
1332	common	chr16	84299949	84300294	2.99467	2.92475	56	38	2	84300116	84300138	GGGAGGCTGGGAAATGTAGTCT	1.12e-09	3	0	NA	NA	NA	NA	NA	NA	NA	NA	NA	NA	NA	NA	NA	NA	NA	NA	NA	NA	NA	NA	NA	NA	NA	NA	NA	NA	NA	NA	NA	NA	NA	NA	NA	NA
1333	F80L absent	chr19	33949183	33949600	2.06125	1.24801	55	39	NA	NA	NA	NA	NA	NA	0	NA	NA	NA	NA	NA	NA	NA	NA	NA	NA	NA	NA	NA	NA	NA	NA	NA	NA	NA	NA	NA	NA	NA	NA	NA	NA	NA	NA	NA	NA	NA	NA	NA	NA
1334	common	chr19	1095311	1095765	3.9039	3.14784	333	151	3	1095492	1095514	AGCCTTACGAGAGCGGCAGTTG	0.000115	17	1	POLR2E	60	-	protein_coding	6.34483	5.87995	5.75061	5.73633	-0.646449	0.0662382	NA	NA	NA	NA	NA	NA	NA	NA	NA	NA	NA	NA	NA	NA	NA	NA	NA	NA	NA	NA	NA	NA	NA	NA
1335	F80L absent	chr10	81085931	81086505	2.04117	0.368926	92	43	NA	NA	NA	NA	NA	NA	0	NA	NA	NA	NA	NA	NA	NA	NA	NA	NA	NA	NA	NA	NA	NA	NA	NA	NA	NA	NA	NA	NA	NA	NA	NA	NA	NA	NA	NA	NA	NA	NA	NA	NA
1336	common	chr3	122785554	122786033	4.07785	2.84483	414	159	2	122785805	122785827	TGCTCGCTGGGAGTTGTAGTCT	5.19e-10	8	1	PDIA5	116	+	protein_coding	2.77189	2.488	3.07211	3.16672	0.17095	0.710748	NA	NA	NA	NA	NA	NA	NA	NA	NA	NA	NA	NA	NA	NA	NA	NA	NA	NA	NA	NA	NA	NA	NA	NA
1337	F80L absent	chr1	30298434	30299059	1.65246	0.374233	48	20	NA	NA	NA	NA	NA	NA	0	NA	NA	NA	NA	NA	NA	NA	NA	NA	NA	NA	NA	NA	NA	NA	NA	NA	NA	NA	NA	NA	NA	NA	NA	NA	NA	NA	NA	NA	NA	NA	NA	NA	NA
1338	common	chr15	75315664	75316054	4.5265	3.53221	478	238	4	75315832	75315854	AGCCTTCTGGGAGCTGTAGTCC	8.86e-11	38	1	PPCDC	37	+	protein_coding	3.44493	3.31615	3.90014	3.56925	0.270062	0.462564	NA	NA	NA	NA	NA	NA	NA	NA	NA	NA	NA	NA	NA	NA	NA	NA	NA	NA	NA	NA	NA	NA	NA	NA
1339	common	chr2	219134821	219135465	5.29599	4.02833	1347	572	5	219135140	219135162	GGGCTTCTGGGAGATGTAGTTT	2.34e-11	7	2	AAMP	-163	-	protein_coding	6.61029	6.13771	6.42727	6.44675	0.0712975	0.780277	PNKD	-28	+	protein_coding	5.48414	5.25852	5.40871	5.37191	0.0151164	0.97021	NA	NA	NA	NA	NA	NA	NA	NA	NA	NA	NA	NA	NA	NA
1340	common	chr17	12692485	12692943	4.25876	3.19923	581	258	3	12692746	12692768	TGCATGCCGGGACTTGTAGTTT	6.82e-10	9	1	ARHGAP44	142	+	protein_coding	2.37295	2.45418	2.57773	2.63459	0.208323	0.478886	NA	NA	NA	NA	NA	NA	NA	NA	NA	NA	NA	NA	NA	NA	NA	NA	NA	NA	NA	NA	NA	NA	NA	NA
1341	common	chr11	63438907	63439491	4.65494	3.08279	595	264	3	63439234	63439256	AGCCTGCTGGGAGTTGTAGTTC	8.19e-12	47	1	ATL3	194	-	protein_coding	3.31904	3.34625	3.90111	3.82171	0.496924	3.22527e-05	NA	NA	NA	NA	NA	NA	NA	NA	NA	NA	NA	NA	NA	NA	NA	NA	NA	NA	NA	NA	NA	NA	NA	NA
1342	common	chr21	46857078	46858261	2.06164	0.697253	167	56	NA	NA	NA	NA	NA	NA	0	NA	NA	NA	NA	NA	NA	NA	NA	NA	NA	NA	NA	NA	NA	NA	NA	NA	NA	NA	NA	NA	NA	NA	NA	NA	NA	NA	NA	NA	NA	NA	NA	NA	NA
1343	F80L absent	chr8	134103759	134104252	2.15949	0.80968	35	23	NA	NA	NA	NA	NA	NA	0	NA	NA	NA	NA	NA	NA	NA	NA	NA	NA	NA	NA	NA	NA	NA	NA	NA	NA	NA	NA	NA	NA	NA	NA	NA	NA	NA	NA	NA	NA	NA	NA	NA	NA
1344	F80L absent	chr2	36844910	36845776	2.2343	1.23256	98	54	2	36845642	36845664	GGGTGCCTGGGAAATGTAGTCC	1.04e-08	4	0	NA	NA	NA	NA	NA	NA	NA	NA	NA	NA	NA	NA	NA	NA	NA	NA	NA	NA	NA	NA	NA	NA	NA	NA	NA	NA	NA	NA	NA	NA	NA	NA	NA	NA
1345	common	chr5	118787938	118788289	3.91907	2.67172	201	89	2	118788095	118788117	GGAATCCTGGGAAATGTAGTTA	2.29e-09	31	1	HSD17B4	25	+	protein_coding	7.72206	7.69954	7.73057	7.54551	-0.0365797	0.851334	NA	NA	NA	NA	NA	NA	NA	NA	NA	NA	NA	NA	NA	NA	NA	NA	NA	NA	NA	NA	NA	NA	NA	NA
1346	F80L absent	chr14	106156130	106157675	2.2102	1.41337	144	71	NA	NA	NA	NA	NA	NA	0	NA	NA	NA	NA	NA	NA	NA	NA	NA	NA	NA	NA	NA	NA	NA	NA	NA	NA	NA	NA	NA	NA	NA	NA	NA	NA	NA	NA	NA	NA	NA	NA	NA	NA
1347	F80L absent	chr5	1929187	1930033	2.15853	0.742372	199	86	1	1929648	1929670	TGTGGCATGGGGGTTGTGATGT	0.000458	197	0	NA	NA	NA	NA	NA	NA	NA	NA	NA	NA	NA	NA	NA	NA	NA	NA	NA	NA	NA	NA	NA	NA	NA	NA	NA	NA	NA	NA	NA	NA	NA	NA	NA	NA
1348	common	chr3	101443383	101444057	5.20945	3.91383	687	306	3	101443771	101443793	AGGCTTCTGGGGGCTGTAGTCC	7.64e-09	30	0	NA	NA	NA	NA	NA	NA	NA	NA	NA	NA	NA	NA	NA	NA	NA	NA	NA	NA	NA	NA	NA	NA	NA	NA	NA	NA	NA	NA	NA	NA	NA	NA	NA	NA
1349	common	chr17	79980860	79981367	4.26114	2.71967	495	226	5	79981134	79981156	AGCCTGCTAGGAGTTGTAGTTC	2.88e-09	6	1	LRRC45	65	+	protein_coding	4.22574	3.66789	4.0365	3.83188	-0.215221	0.693105	NA	NA	NA	NA	NA	NA	NA	NA	NA	NA	NA	NA	NA	NA	NA	NA	NA	NA	NA	NA	NA	NA	NA	NA
1350	common	chr19	36869855	36870406	4.17036	2.69237	526	237	2	36870111	36870133	AGGCCTGTGGGAAATGTAGTCC	2.11e-09	6	1	ZFP14	-29	-	protein_coding	2.30743	2.36457	3.22497	2.91648	0.618011	0.00106696	NA	NA	NA	NA	NA	NA	NA	NA	NA	NA	NA	NA	NA	NA	NA	NA	NA	NA	NA	NA	NA	NA	NA	NA
1351	common	chr9	137848405	137848966	2.29372	1.36809	120	76	1	137848459	137848481	GGGTTTCTAGGTATGTATGTCC	0.000475	253	0	NA	NA	NA	NA	NA	NA	NA	NA	NA	NA	NA	NA	NA	NA	NA	NA	NA	NA	NA	NA	NA	NA	NA	NA	NA	NA	NA	NA	NA	NA	NA	NA	NA	NA
1352	F80L absent	chr9	67663030	67663261	3.70807	1.89175	28	10	NA	NA	NA	NA	NA	NA	0	NA	NA	NA	NA	NA	NA	NA	NA	NA	NA	NA	NA	NA	NA	NA	NA	NA	NA	NA	NA	NA	NA	NA	NA	NA	NA	NA	NA	NA	NA	NA	NA	NA	NA
1353	F80L absent	chr17	6097223	6097530	1.30164	0.611804	76	49	6	6097463	6097485	GTGGTGATGGGGGTGGTGGTGA	0.000327	3	0	NA	NA	NA	NA	NA	NA	NA	NA	NA	NA	NA	NA	NA	NA	NA	NA	NA	NA	NA	NA	NA	NA	NA	NA	NA	NA	NA	NA	NA	NA	NA	NA	NA	NA
1354	common	chr17	38083590	38084370	4.79167	4.07286	1261	578	4	38083905	38083927	CGCCTTCTGGGAGTTGTAGTTT	8.6e-11	18	2	ORMDL3	-126	-	protein_coding	4.70543	4.52042	5.07468	5.04483	0.344464	0.0478088	RP11-387H17.4	15	+	ND	ND	ND	ND	ND	ND	ND	NA	NA	NA	NA	NA	NA	NA	NA	NA	NA	NA	NA	NA	NA
1355	F80L absent	chrX	9537028	9537298	2.23201	0.710646	57	23	NA	NA	NA	NA	NA	NA	0	NA	NA	NA	NA	NA	NA	NA	NA	NA	NA	NA	NA	NA	NA	NA	NA	NA	NA	NA	NA	NA	NA	NA	NA	NA	NA	NA	NA	NA	NA	NA	NA	NA	NA
1356	F80L absent	chr14	99798706	99799547	1.24401	0.440234	66	22	NA	NA	NA	NA	NA	NA	0	NA	NA	NA	NA	NA	NA	NA	NA	NA	NA	NA	NA	NA	NA	NA	NA	NA	NA	NA	NA	NA	NA	NA	NA	NA	NA	NA	NA	NA	NA	NA	NA	NA	NA
1357	F80L absent	chr19	302881	304014	2.61651	1.3443	95	53	NA	NA	NA	NA	NA	NA	0	NA	NA	NA	NA	NA	NA	NA	NA	NA	NA	NA	NA	NA	NA	NA	NA	NA	NA	NA	NA	NA	NA	NA	NA	NA	NA	NA	NA	NA	NA	NA	NA	NA	NA
1358	common	chr8	146017613	146018151	4.06439	3.0165	754	370	3	146017865	146017887	TGCACGCCGGGGCTTGTAGTCA	3.1e-07	14	1	RPL8	90	-	protein_coding	11.4192	11.1235	10.7426	11.1248	-0.399098	0.111962	NA	NA	NA	NA	NA	NA	NA	NA	NA	NA	NA	NA	NA	NA	NA	NA	NA	NA	NA	NA	NA	NA	NA	NA
1359	common	chr1	228917803	228918566	2.0841	0.47356	241	96	1	228918325	228918347	GTCTGTGTGTGTAGTGTAGTGT	0.000553	144	0	NA	NA	NA	NA	NA	NA	NA	NA	NA	NA	NA	NA	NA	NA	NA	NA	NA	NA	NA	NA	NA	NA	NA	NA	NA	NA	NA	NA	NA	NA	NA	NA	NA	NA
1360	common	chr7	158152779	158153784	1.03489	-0.2491	113	43	6	158152977	158152999	GTCATCCTGGGTGAGGGTGGAT	0.000322	83	0	NA	NA	NA	NA	NA	NA	NA	NA	NA	NA	NA	NA	NA	NA	NA	NA	NA	NA	NA	NA	NA	NA	NA	NA	NA	NA	NA	NA	NA	NA	NA	NA	NA	NA
1361	F80L absent	chr2	136288231	136288649	3.26842	2.30025	94	46	2	136288403	136288425	TGCTTGGCTGGAATTGTAGTTC	4.78e-07	24	1	ZRANB3	366	-	protein_coding	3.36597	3.37573	3.86394	3.72683	0.416738	0.00772755	NA	NA	NA	NA	NA	NA	NA	NA	NA	NA	NA	NA	NA	NA	NA	NA	NA	NA	NA	NA	NA	NA	NA	NA
1362	F80L absent	chr2	97197971	97198387	2.92097	1.9818	88	36	2	97198139	97198161	GGTATCCTGGGAGATGGAGTTC	5.18e-09	15	1	RP11-363D14.1	-136	-	ND	ND	ND	ND	ND	ND	ND	NA	NA	NA	NA	NA	NA	NA	NA	NA	NA	NA	NA	NA	NA	NA	NA	NA	NA	NA	NA	NA	NA	NA	NA
1363	common	chr1	231663772	231664409	3.80753	2.94842	475	259	3	231664071	231664093	GGTGCTGTGGGGGTTGTAGTTC	4.48e-07	10	3	RP11-295G20.2	212	-	antisense	4.87431	4.93026	6.91958	7.15299	2.11009	1.19036e-30	TSNAX-DISC1	309	+	ND	ND	ND	ND	ND	ND	ND	TSNAX	309	+	protein_coding	6.2724	6.35808	6.38249	6.33128	-0.0229199	0.923329	NA	NA	NA	NA
1364	common	chr11	1092957	1093402	1.88301	0.409786	296	129	11	1093306	1093328	GTGCCGGTGGGTGTTGGGGTTG	4.68e-05	11	0	NA	NA	NA	NA	NA	NA	NA	NA	NA	NA	NA	NA	NA	NA	NA	NA	NA	NA	NA	NA	NA	NA	NA	NA	NA	NA	NA	NA	NA	NA	NA	NA	NA	NA
1365	F80L absent	chr1	177320755	177321270	2.20217	0.580719	60	22	NA	NA	NA	NA	NA	NA	1	RP1-35C21.1	-290	+	ND	ND	ND	ND	ND	ND	ND	NA	NA	NA	NA	NA	NA	NA	NA	NA	NA	NA	NA	NA	NA	NA	NA	NA	NA	NA	NA	NA	NA	NA	NA
1366	F80L absent	chr2	47104842	47105412	1.64372	0.648598	84	44	1	47104930	47104952	GGGTATGTGGTGTGTGTGGTGT	0.000747	193	0	NA	NA	NA	NA	NA	NA	NA	NA	NA	NA	NA	NA	NA	NA	NA	NA	NA	NA	NA	NA	NA	NA	NA	NA	NA	NA	NA	NA	NA	NA	NA	NA	NA	NA
1367	F80L absent	chr6	163660572	163661241	1.72059	0.105097	78	36	NA	NA	NA	NA	NA	NA	0	NA	NA	NA	NA	NA	NA	NA	NA	NA	NA	NA	NA	NA	NA	NA	NA	NA	NA	NA	NA	NA	NA	NA	NA	NA	NA	NA	NA	NA	NA	NA	NA	NA	NA
1368	common	chr19	2819562	2820036	5.83878	3.83469	1469	648	4	2819820	2819842	GGCCTGCTGGGACTTGTAGTTC	2.74e-11	8	1	ZNF554	73	+	protein_coding	1.76129	1.79494	2.10098	2.07382	0.302923	0.406901	NA	NA	NA	NA	NA	NA	NA	NA	NA	NA	NA	NA	NA	NA	NA	NA	NA	NA	NA	NA	NA	NA	NA	NA
1369	common	chr3	50329581	50330265	5.61293	4.0968	1454	675	5	50329925	50329947	AGGCCTCTGGGATTAGTAGTTT	2.03e-08	7	1	IFRD2	426	-	protein_coding	6.07425	5.77847	5.98891	5.80012	-0.300108	0.346042	NA	NA	NA	NA	NA	NA	NA	NA	NA	NA	NA	NA	NA	NA	NA	NA	NA	NA	NA	NA	NA	NA	NA	NA
1370	common	chr1	243418704	243419529	4.17999	2.93084	794	375	3	243419273	243419295	TGCACGTCGGGAGTTGTAGTCC	5.87e-09	2	2	CEP170	-466	-	protein_coding	5.81481	5.90833	6.05202	6.08916	0.0607366	0.743218	SDCCAG8	204	+	protein_coding	4.06091	3.76977	3.8339	4.10936	0.00184381	0.996879	NA	NA	NA	NA	NA	NA	NA	NA	NA	NA	NA	NA	NA	NA
1371	common	chr1	207097398	207097797	1.69188	0.686842	122	62	1	207097342	207097364	TGTTGTGTGTGGTATGTAGTTA	0.000435	252	0	NA	NA	NA	NA	NA	NA	NA	NA	NA	NA	NA	NA	NA	NA	NA	NA	NA	NA	NA	NA	NA	NA	NA	NA	NA	NA	NA	NA	NA	NA	NA	NA	NA	NA
1372	common	chr19	37340861	37342003	3.509	2.18606	335	168	7	37341176	37341198	GGTCTCCTGGGAAACGTAGTCC	6.75e-09	17	2	ZNF345	-169	+	protein_coding	1.65992	1.76977	1.75275	2.08746	0.165534	0.776337	ZNF790	257	-	protein_coding	1.79077	1.774	2.24793	2.31615	0.437517	0.196818	NA	NA	NA	NA	NA	NA	NA	NA	NA	NA	NA	NA	NA	NA
1373	common	chr19	7600101	7600804	4.35564	3.35799	956	424	6	7600583	7600605	TGCATGCCGGGAAACGTAGTTC	1.71e-09	26	0	NA	NA	NA	NA	NA	NA	NA	NA	NA	NA	NA	NA	NA	NA	NA	NA	NA	NA	NA	NA	NA	NA	NA	NA	NA	NA	NA	NA	NA	NA	NA	NA	NA	NA
1374	F80L absent	chr14	95931512	95932037	2.13417	1.37709	31	11	NA	NA	NA	NA	NA	NA	0	NA	NA	NA	NA	NA	NA	NA	NA	NA	NA	NA	NA	NA	NA	NA	NA	NA	NA	NA	NA	NA	NA	NA	NA	NA	NA	NA	NA	NA	NA	NA	NA	NA	NA
1375	common	chr18	46065105	46065521	4.30865	2.37964	237	106	5	46065313	46065335	GGCCTGCTGGGTAATGTAGTTC	2.97e-10	2	1	CTIF	104	+	protein_coding	2.73552	2.1375	2.31034	1.96717	-0.187016	0.687835	NA	NA	NA	NA	NA	NA	NA	NA	NA	NA	NA	NA	NA	NA	NA	NA	NA	NA	NA	NA	NA	NA	NA	NA
1376	common	chr10	104613935	104614489	3.92154	2.34731	321	155	5	104614329	104614351	TGCATTCTGGGGTGTGCAGTCT	2.37e-07	26	2	C10orf32	-232	+	protein_coding	4.1819	4.18269	4.46923	4.21645	0.134801	0.636405	C10orf32-ASMT	-183	+	ND	ND	ND	ND	ND	ND	ND	NA	NA	NA	NA	NA	NA	NA	NA	NA	NA	NA	NA	NA	NA
1377	F80L absent	chr19	47732483	47732741	1.8852	2.40419	55	27	4	47732762	47732784	GTGCTGCTGGGCTGTGTGGGAT	0.00017	51	0	NA	NA	NA	NA	NA	NA	NA	NA	NA	NA	NA	NA	NA	NA	NA	NA	NA	NA	NA	NA	NA	NA	NA	NA	NA	NA	NA	NA	NA	NA	NA	NA	NA	NA
1378	F80L absent	chr2	240203211	240203454	2.34192	2.09717	15	8	NA	NA	NA	NA	NA	NA	0	NA	NA	NA	NA	NA	NA	NA	NA	NA	NA	NA	NA	NA	NA	NA	NA	NA	NA	NA	NA	NA	NA	NA	NA	NA	NA	NA	NA	NA	NA	NA	NA	NA	NA
1379	common	chr10	64564026	64564656	4.20451	3.29149	700	359	3	64564444	64564466	AGCATGCCGGGACTTGTAGTCC	7.28e-10	18	1	ADO	175	+	protein_coding	4.32912	4.26529	4.41414	4.21723	-0.00512676	0.986547	NA	NA	NA	NA	NA	NA	NA	NA	NA	NA	NA	NA	NA	NA	NA	NA	NA	NA	NA	NA	NA	NA	NA	NA
1380	common	chr1	153949996	153950488	3.50275	2.0233	323	133	5	153950194	153950216	TGCATTGTGGTCTTGGTAGTCT	8.37e-06	26	2	JTB	-78	-	protein_coding	6.60585	6.61633	6.43863	6.34891	-0.25568	0.0478088	RP11-422P24.11	-23	+	lincRNA	0.9855	1.51602	1.9222	1.81967	0.569664	0.367345	NA	NA	NA	NA	NA	NA	NA	NA	NA	NA	NA	NA	NA	NA
1381	F80L absent	chr2	237502352	237502767	2.05518	0.953171	63	31	NA	NA	NA	NA	NA	NA	0	NA	NA	NA	NA	NA	NA	NA	NA	NA	NA	NA	NA	NA	NA	NA	NA	NA	NA	NA	NA	NA	NA	NA	NA	NA	NA	NA	NA	NA	NA	NA	NA	NA	NA
1382	common	chr1	156024225	156024958	4.7093	3.61528	891	438	5	156024490	156024512	GGGGCTCTGGGAATCGTAGTTC	6.8e-09	1	1	LAMTOR2	-48	+	protein_coding	5.79233	5.52011	5.41954	5.55857	-0.193011	0.561747	NA	NA	NA	NA	NA	NA	NA	NA	NA	NA	NA	NA	NA	NA	NA	NA	NA	NA	NA	NA	NA	NA	NA	NA
1383	common	chr6	42017951	42018509	3.51453	2.23658	344	148	3	42018227	42018249	GGCGCGATGGGACTTGTAGTCG	1.28e-07	13	2	CCND3	-135	-	protein_coding	3.78241	3.66107	3.57046	3.38957	-0.289211	0.292408	TAF8	21	+	protein_coding	4.23573	4.40871	4.74631	4.8212	0.422667	0.000946108	NA	NA	NA	NA	NA	NA	NA	NA	NA	NA	NA	NA	NA	NA
1384	common	chr7	74071632	74072074	5.22963	3.34029	537	243	3	74071858	74071880	TGCTTCCTGGGAGTTGTAGTCC	1.78e-10	14	1	GTF2I	141	+	protein_coding	7.0217	7.15249	7.17572	7.07275	-0.0149355	0.947403	NA	NA	NA	NA	NA	NA	NA	NA	NA	NA	NA	NA	NA	NA	NA	NA	NA	NA	NA	NA	NA	NA	NA	NA
1385	common	chr2	207239656	207240073	3.87149	2.89905	57	27	NA	NA	NA	NA	NA	NA	0	NA	NA	NA	NA	NA	NA	NA	NA	NA	NA	NA	NA	NA	NA	NA	NA	NA	NA	NA	NA	NA	NA	NA	NA	NA	NA	NA	NA	NA	NA	NA	NA	NA	NA
1386	common	chr19	3762507	3762872	3.20991	2.84627	169	73	3	3762621	3762643	GGGTGTTTGGGAGTTGTAGGCC	3.16e-07	4	1	MRPL54	-27	+	protein_coding	5.65621	5.48414	4.28466	4.01881	-1.44385	3.40452e-12	NA	NA	NA	NA	NA	NA	NA	NA	NA	NA	NA	NA	NA	NA	NA	NA	NA	NA	NA	NA	NA	NA	NA	NA
1387	common	chr11	113644225	113644831	5.10154	3.89631	580	263	5	113644470	113644492	GGCCTGCCGGGAAACGGAGTCT	2.23e-08	16	1	ZW10	5	-	protein_coding	4.54473	4.48929	4.77189	4.62176	0.153242	0.4378	NA	NA	NA	NA	NA	NA	NA	NA	NA	NA	NA	NA	NA	NA	NA	NA	NA	NA	NA	NA	NA	NA	NA	NA
1388	F80L absent	chr1	20767254	20767699	2.6676	1.50889	62	31	2	20767468	20767490	GGGAGGCTGGGAAATGTAGTCT	1.12e-09	18	0	NA	NA	NA	NA	NA	NA	NA	NA	NA	NA	NA	NA	NA	NA	NA	NA	NA	NA	NA	NA	NA	NA	NA	NA	NA	NA	NA	NA	NA	NA	NA	NA	NA	NA
1389	F80L absent	chr9	128966779	128967400	1.44872	0.555182	79	47	NA	NA	NA	NA	NA	NA	0	NA	NA	NA	NA	NA	NA	NA	NA	NA	NA	NA	NA	NA	NA	NA	NA	NA	NA	NA	NA	NA	NA	NA	NA	NA	NA	NA	NA	NA	NA	NA	NA	NA	NA
1390	F80L absent	chr6	170263641	170264136	1.55156	0.345468	77	42	NA	NA	NA	NA	NA	NA	0	NA	NA	NA	NA	NA	NA	NA	NA	NA	NA	NA	NA	NA	NA	NA	NA	NA	NA	NA	NA	NA	NA	NA	NA	NA	NA	NA	NA	NA	NA	NA	NA	NA	NA
1391	common	chr6	170240143	170240681	1.87373	0.477521	73	23	2	170240454	170240476	GGCGTGGTGTGGTCTGGAGTGG	0.000606	56	0	NA	NA	NA	NA	NA	NA	NA	NA	NA	NA	NA	NA	NA	NA	NA	NA	NA	NA	NA	NA	NA	NA	NA	NA	NA	NA	NA	NA	NA	NA	NA	NA	NA	NA
1392	common	chr4	3615082	3615561	1.42567	0.350757	86	23	2	3615668	3615690	TCCGTTCTGTGTTGTGTAGTGT	0.000145	132	0	NA	NA	NA	NA	NA	NA	NA	NA	NA	NA	NA	NA	NA	NA	NA	NA	NA	NA	NA	NA	NA	NA	NA	NA	NA	NA	NA	NA	NA	NA	NA	NA	NA	NA
1393	common	chr17	27046477	27047091	4.7205	3.73377	1026	528	4	27046707	27046729	GTAAACCCGGGAGGCGGAGCTT	0.000293	19	1	RPL23A	-373	+	protein_coding	11.2747	11.3735	11.264	11.5533	0.0492854	0.883669	NA	NA	NA	NA	NA	NA	NA	NA	NA	NA	NA	NA	NA	NA	NA	NA	NA	NA	NA	NA	NA	NA	NA	NA
1394	common	chr1	1310511	1311033	4.13114	3.22459	542	268	3	1310707	1310729	CGGTTTCCGGTTAGTGGAATCA	0.00089	8	1	AURKAIP1	103	-	protein_coding	6.25437	5.67158	5.35826	5.25361	-0.720948	0.0147561	NA	NA	NA	NA	NA	NA	NA	NA	NA	NA	NA	NA	NA	NA	NA	NA	NA	NA	NA	NA	NA	NA	NA	NA
1395	F80L absent	chr2	47739756	47740026	2.25507	1.18516	15	8	NA	NA	NA	NA	NA	NA	0	NA	NA	NA	NA	NA	NA	NA	NA	NA	NA	NA	NA	NA	NA	NA	NA	NA	NA	NA	NA	NA	NA	NA	NA	NA	NA	NA	NA	NA	NA	NA	NA	NA	NA
1396	common	chr6	11093707	11094250	4.99575	3.31705	551	278	3	11093984	11094006	GGTCGGCTGGGAGATGGAGTGC	4.09e-07	2	1	SMIM13	288	+	protein_coding	4.0063	3.88557	4.21723	3.96532	0.17116	0.430759	NA	NA	NA	NA	NA	NA	NA	NA	NA	NA	NA	NA	NA	NA	NA	NA	NA	NA	NA	NA	NA	NA	NA	NA
1397	common	chr20	62587486	62588258	6.10349	5.05683	3893	1814	7	62587871	62587893	GGCCTTGTGGGGCTTGTAGTCC	9.89e-09	8	1	UCKL1	-103	-	protein_coding	4.2817	3.76871	3.89433	3.79805	-0.271876	0.496561	NA	NA	NA	NA	NA	NA	NA	NA	NA	NA	NA	NA	NA	NA	NA	NA	NA	NA	NA	NA	NA	NA	NA	NA
1398	common	chr17	26662263	26662912	4.49681	3.21406	795	425	5	26662697	26662719	TGCATGCAGGGACTTGTAGTCT	2.14e-08	48	2	IFT20	-72	-	protein_coding	4.94298	4.97223	5.15299	5.15745	0.172925	0.51906	TNFAIP1	41	+	protein_coding	3.92979	3.82273	4.20242	4.17313	0.286442	0.1121	NA	NA	NA	NA	NA	NA	NA	NA	NA	NA	NA	NA	NA	NA
1399	F80L absent	chr1	7558871	7559627	2.17004	0.846007	58	33	NA	NA	NA	NA	NA	NA	0	NA	NA	NA	NA	NA	NA	NA	NA	NA	NA	NA	NA	NA	NA	NA	NA	NA	NA	NA	NA	NA	NA	NA	NA	NA	NA	NA	NA	NA	NA	NA	NA	NA	NA
1400	common	chr11	43665599	43665983	4.46034	3.60161	235	140	6	43665757	43665779	GGCATTGTGGGAGTTGTCGTAA	6.52e-07	5	0	NA	NA	NA	NA	NA	NA	NA	NA	NA	NA	NA	NA	NA	NA	NA	NA	NA	NA	NA	NA	NA	NA	NA	NA	NA	NA	NA	NA	NA	NA	NA	NA	NA	NA
1401	F80L absent	chr11	131550282	131550547	1.68998	1.5757	64	47	NA	NA	NA	NA	NA	NA	0	NA	NA	NA	NA	NA	NA	NA	NA	NA	NA	NA	NA	NA	NA	NA	NA	NA	NA	NA	NA	NA	NA	NA	NA	NA	NA	NA	NA	NA	NA	NA	NA	NA	NA
1402	common	chr6	163148574	163149140	4.52233	3.56133	860	380	2	163148860	163148882	GGCCTGCTGGGAGTCGTAGTTC	1.03e-10	17	1	PARK2	-54	-	ND	ND	ND	ND	ND	ND	ND	NA	NA	NA	NA	NA	NA	NA	NA	NA	NA	NA	NA	NA	NA	NA	NA	NA	NA	NA	NA	NA	NA	NA	NA
1403	common	chr14	68162329	68162744	3.99495	2.07287	110	47	2	68162528	68162550	GACCTTCTGGGAAATGTAGTCC	7.97e-10	8	1	RDH11	-5	-	protein_coding	5.36527	5.42794	4.45483	4.4522	-0.968704	1.84497e-16	NA	NA	NA	NA	NA	NA	NA	NA	NA	NA	NA	NA	NA	NA	NA	NA	NA	NA	NA	NA	NA	NA	NA	NA
1404	common	chr20	33680480	33681038	4.62775	2.73063	454	224	3	33680725	33680747	AGGCTACTGGGAATTGTAGTCC	4.91e-10	13	1	TRPC4AP	-85	-	protein_coding	4.91934	4.80632	4.90352	4.80219	-0.0338734	0.900332	NA	NA	NA	NA	NA	NA	NA	NA	NA	NA	NA	NA	NA	NA	NA	NA	NA	NA	NA	NA	NA	NA	NA	NA
1405	common	chr19	507332	508325	5.78448	4.64706	2412	1091	3	507882	507904	GGCATGCTGGGAGTTGAAGTCC	1.88e-10	26	2	TPGS1	-529	+	ND	ND	ND	ND	ND	ND	ND	AC005775.2	-15	-	ND	ND	ND	ND	ND	ND	ND	NA	NA	NA	NA	NA	NA	NA	NA	NA	NA	NA	NA	NA	NA
1406	common	chr19	19887088	19887613	4.89051	3.97688	655	298	6	19887314	19887336	GGTATGCTGGGAGTTGTAGTCT	2.04e-10	13	2	LINC00663	-118	-	ND	ND	ND	ND	ND	ND	ND	CTC-559E9.6	61	+	protein_coding	-0.104697	1.0635	0.918386	0.941106	0.195802	0.92874	NA	NA	NA	NA	NA	NA	NA	NA	NA	NA	NA	NA	NA	NA
1407	common	chr3	28390316	28390853	4.74874	3.48093	435	211	4	28390613	28390635	AGGCTCACGGGACATGTAGTAC	5.13e-07	23	2	AZI2	34	-	protein_coding	5.27575	5.32481	5.57319	5.93404	0.321436	0.138622	ZCWPW2	53	+	ND	ND	ND	ND	ND	ND	ND	NA	NA	NA	NA	NA	NA	NA	NA	NA	NA	NA	NA	NA	NA
1408	common	chr11	72145379	72146048	4.05641	3.08134	554	287	6	72145627	72145649	TACCTCACGGGAGAGGTAGTCC	1.16e-06	15	1	CLPB	-21	-	protein_coding	4.88313	4.66676	5.46369	5.27538	0.601432	0.00113599	NA	NA	NA	NA	NA	NA	NA	NA	NA	NA	NA	NA	NA	NA	NA	NA	NA	NA	NA	NA	NA	NA	NA	NA
1409	F80L only	chr17	48506838	48507158	0.601239	-0.554349	32	16	2	48507075	48507097	ACCATGTTGGTCAGACTAGTCT	0.00097	83	0	NA	NA	NA	NA	NA	NA	NA	NA	NA	NA	NA	NA	NA	NA	NA	NA	NA	NA	NA	NA	NA	NA	NA	NA	NA	NA	NA	NA	NA	NA	NA	NA	NA	NA
1410	common	chr2	202316103	202316562	5.04395	3.37561	642	313	4	202316341	202316363	GACCTGCTGGGAATTGTAGTTT	8.1e-10	0	1	TRAK2	-30	-	protein_coding	2.98003	3.12598	3.34767	3.22188	0.218897	0.232711	NA	NA	NA	NA	NA	NA	NA	NA	NA	NA	NA	NA	NA	NA	NA	NA	NA	NA	NA	NA	NA	NA	NA	NA
1411	F80L absent	chr22	49278041	49278524	2.04099	0.692956	48	24	NA	NA	NA	NA	NA	NA	0	NA	NA	NA	NA	NA	NA	NA	NA	NA	NA	NA	NA	NA	NA	NA	NA	NA	NA	NA	NA	NA	NA	NA	NA	NA	NA	NA	NA	NA	NA	NA	NA	NA	NA
1412	common	chr5	168006513	168006994	5.22165	3.76705	884	442	6	168006711	168006733	CGCTCTCTGGCTGTAGTTGTGC	0.000698	15	1	PANK3	-148	-	protein_coding	5.42492	5.48059	5.84875	5.55766	0.215751	0.170118	NA	NA	NA	NA	NA	NA	NA	NA	NA	NA	NA	NA	NA	NA	NA	NA	NA	NA	NA	NA	NA	NA	NA	NA
1413	common	chr22	29853650	29854048	3.23657	2.46694	175	101	5	29853933	29853955	AGGAGCTTGGGAAATGTAGTTT	3.53e-08	21	0	NA	NA	NA	NA	NA	NA	NA	NA	NA	NA	NA	NA	NA	NA	NA	NA	NA	NA	NA	NA	NA	NA	NA	NA	NA	NA	NA	NA	NA	NA	NA	NA	NA	NA
1414	common	chr14	89827141	89828173	1.33783	0.175692	127	42	10	89827319	89827341	GTGGTGCTGGAGGTGGTAGTGG	0.000221	5	0	NA	NA	NA	NA	NA	NA	NA	NA	NA	NA	NA	NA	NA	NA	NA	NA	NA	NA	NA	NA	NA	NA	NA	NA	NA	NA	NA	NA	NA	NA	NA	NA	NA	NA
1415	F80L absent	chr22	20150213	20151760	0.740833	-0.0817146	114	36	NA	NA	NA	NA	NA	NA	0	NA	NA	NA	NA	NA	NA	NA	NA	NA	NA	NA	NA	NA	NA	NA	NA	NA	NA	NA	NA	NA	NA	NA	NA	NA	NA	NA	NA	NA	NA	NA	NA	NA	NA
1416	common	chr7	149535199	149535701	4.09939	3.30559	544	282	3	149535422	149535444	GGCGTGACGGGAAGTGTAGTCC	3.68e-08	6	1	ZNF862	6	+	protein_coding	0.948601	1.25096	1.66448	1.4957	0.0775289	0.920581	NA	NA	NA	NA	NA	NA	NA	NA	NA	NA	NA	NA	NA	NA	NA	NA	NA	NA	NA	NA	NA	NA	NA	NA
1417	common	chr2	38892708	38893243	3.82657	2.38834	170	96	4	38892983	38893005	TGCATTTTGGGGCTTGTAGTCT	1.9e-08	11	1	GALM	77	+	protein_coding	3.17632	3.16993	3.05311	3.13093	-0.125057	0.725869	NA	NA	NA	NA	NA	NA	NA	NA	NA	NA	NA	NA	NA	NA	NA	NA	NA	NA	NA	NA	NA	NA	NA	NA
1418	common	chr1	231114490	231115043	4.9857	3.84676	1374	736	2	231114747	231114769	GGCTTATTGGGATTCGTAGTCC	2.13e-07	13	2	TTC13	-145	-	protein_coding	4.36177	4.48671	4.43763	4.57168	-0.0379659	0.901966	ARV1	-39	+	protein_coding	5.36492	5.45121	5.21296	5.34873	-0.163738	0.506114	NA	NA	NA	NA	NA	NA	NA	NA	NA	NA	NA	NA	NA	NA
1419	common	chr15	74753329	74753738	4.17567	2.40764	323	145	4	74753533	74753555	TGCATTCTGGGAGTTGCAGTTC	5.01e-10	13	2	UBL7	-10	-	protein_coding	5.39472	5.27947	5.91767	5.76633	0.402427	0.00949458	UBL7-AS1	73	+	antisense	1.50589	1.59932	1.43296	1.53107	-0.215816	0.78184	NA	NA	NA	NA	NA	NA	NA	NA	NA	NA	NA	NA	NA	NA
1420	F80L absent	chr6	44012277	44013164	2.22383	0.887586	98	39	NA	NA	NA	NA	NA	NA	0	NA	NA	NA	NA	NA	NA	NA	NA	NA	NA	NA	NA	NA	NA	NA	NA	NA	NA	NA	NA	NA	NA	NA	NA	NA	NA	NA	NA	NA	NA	NA	NA	NA	NA
1421	F80L absent	chr6	169683998	169684377	1.63696	0.904953	64	52	NA	NA	NA	NA	NA	NA	0	NA	NA	NA	NA	NA	NA	NA	NA	NA	NA	NA	NA	NA	NA	NA	NA	NA	NA	NA	NA	NA	NA	NA	NA	NA	NA	NA	NA	NA	NA	NA	NA	NA	NA
1422	common	chr19	54682107	54682704	4.73361	3.87909	632	288	5	54682424	54682446	GGCCTGCTGGGAGATGTAGTTC	6.86e-12	14	0	NA	NA	NA	NA	NA	NA	NA	NA	NA	NA	NA	NA	NA	NA	NA	NA	NA	NA	NA	NA	NA	NA	NA	NA	NA	NA	NA	NA	NA	NA	NA	NA	NA	NA
1423	F80L absent	chrX	53084105	53084606	2.93582	2.22051	64	51	4	53084343	53084365	GTGTTTCTGAGTGTGGTAGGGG	0.000796	141	0	NA	NA	NA	NA	NA	NA	NA	NA	NA	NA	NA	NA	NA	NA	NA	NA	NA	NA	NA	NA	NA	NA	NA	NA	NA	NA	NA	NA	NA	NA	NA	NA	NA	NA
1424	common	chr1	185126003	185126601	5.10084	3.04584	680	316	3	185126324	185126346	TGCCTGCTGGGAAACGTAGTTC	2.4e-10	16	2	TRMT1L	-98	-	protein_coding	4.5552	4.72083	4.80839	4.73985	-0.012306	0.963984	SWT1	-90	+	protein_coding	1.69599	1.79077	3.13093	2.97453	1.24863	2.18435e-12	NA	NA	NA	NA	NA	NA	NA	NA	NA	NA	NA	NA	NA	NA
1425	common	chr7	1311743	1312433	2.11881	1.13555	123	61	7	1311930	1311952	GTGTCTGTGGGAGGTGGACAGT	0.000729	25	0	NA	NA	NA	NA	NA	NA	NA	NA	NA	NA	NA	NA	NA	NA	NA	NA	NA	NA	NA	NA	NA	NA	NA	NA	NA	NA	NA	NA	NA	NA	NA	NA	NA	NA
1426	F80L absent	chr5	6785531	6786125	2.11812	0.881025	85	40	NA	NA	NA	NA	NA	NA	0	NA	NA	NA	NA	NA	NA	NA	NA	NA	NA	NA	NA	NA	NA	NA	NA	NA	NA	NA	NA	NA	NA	NA	NA	NA	NA	NA	NA	NA	NA	NA	NA	NA	NA
1427	common	chr19	3761477	3761999	5.14437	3.51251	781	374	6	3761710	3761732	GGCCTGCTGGGAAATGTAGTTC	3.94e-12	9	1	APBA3	-41	-	protein_coding	2.7761	2.50843	2.854	2.80323	0.10291	0.886407	NA	NA	NA	NA	NA	NA	NA	NA	NA	NA	NA	NA	NA	NA	NA	NA	NA	NA	NA	NA	NA	NA	NA	NA
1428	F80L absent	chr9	119528512	119529370	3.43571	1.98208	106	53	1	119528463	119528485	GGCCCAGTGGGGGTTGTCGTCT	2.57e-06	228	0	NA	NA	NA	NA	NA	NA	NA	NA	NA	NA	NA	NA	NA	NA	NA	NA	NA	NA	NA	NA	NA	NA	NA	NA	NA	NA	NA	NA	NA	NA	NA	NA	NA	NA
1429	F80L absent	chr1	41994470	41995046	2.39193	1.11329	77	37	NA	NA	NA	NA	NA	NA	0	NA	NA	NA	NA	NA	NA	NA	NA	NA	NA	NA	NA	NA	NA	NA	NA	NA	NA	NA	NA	NA	NA	NA	NA	NA	NA	NA	NA	NA	NA	NA	NA	NA	NA
1430	common	chr1	44440103	44440739	3.44238	2.16132	389	210	2	44440481	44440503	GGGATTGTGGTAGTTGTAGTCA	1.96e-07	19	1	ATP6V0B	-262	+	protein_coding	6.68538	6.70307	6.68004	6.54736	-0.132258	0.488249	NA	NA	NA	NA	NA	NA	NA	NA	NA	NA	NA	NA	NA	NA	NA	NA	NA	NA	NA	NA	NA	NA	NA	NA
1431	F80L absent	chr5	2460151	2460407	3.07721	0.689911	36	29	NA	NA	NA	NA	NA	NA	0	NA	NA	NA	NA	NA	NA	NA	NA	NA	NA	NA	NA	NA	NA	NA	NA	NA	NA	NA	NA	NA	NA	NA	NA	NA	NA	NA	NA	NA	NA	NA	NA	NA	NA
1432	common	chr9	102861037	102861817	5.1491	4.04759	979	419	5	102861341	102861363	TGCACTTCGGGAAATGTAGTCC	5.05e-09	22	2	ERP44	-105	-	protein_coding	3.58976	3.72028	3.47119	3.49442	-0.198195	0.341084	INVS	111	+	protein_coding	3.07895	3.03034	2.7866	3.0072	-0.216171	0.453791	NA	NA	NA	NA	NA	NA	NA	NA	NA	NA	NA	NA	NA	NA
1433	common	chr20	62289390	62290265	5.2303	4.05631	1709	869	5	62289887	62289909	GGCCTGCCGGGAGCTGTAGTTT	9.07e-10	29	1	RTEL1	-664	+	protein_coding	3.61117	3.46728	4.28466	4.31832	0.246294	0.461522	NA	NA	NA	NA	NA	NA	NA	NA	NA	NA	NA	NA	NA	NA	NA	NA	NA	NA	NA	NA	NA	NA	NA	NA
1434	common	chr17	16438860	16439344	3.99364	3.35037	391	218	6	16439110	16439132	GTGTTCTTGGGAAATGTGGTCC	1.13e-06	1	0	NA	NA	NA	NA	NA	NA	NA	NA	NA	NA	NA	NA	NA	NA	NA	NA	NA	NA	NA	NA	NA	NA	NA	NA	NA	NA	NA	NA	NA	NA	NA	NA	NA	NA
1435	common	chr17	73285444	73285925	3.85082	2.93763	411	193	2	73285621	73285643	ATATCACCGGGTAATGTAGTCC	1.96e-05	7	1	SLC25A19	-93	-	protein_coding	4.42626	4.40939	4.42962	4.48993	0.0261708	0.950125	NA	NA	NA	NA	NA	NA	NA	NA	NA	NA	NA	NA	NA	NA	NA	NA	NA	NA	NA	NA	NA	NA	NA	NA
1436	common	chr5	209185	209916	2.30077	0.565784	147	42	5	209687	209709	GCCAGGCTGCGAAGGGTTGTTT	0.000477	8	0	NA	NA	NA	NA	NA	NA	NA	NA	NA	NA	NA	NA	NA	NA	NA	NA	NA	NA	NA	NA	NA	NA	NA	NA	NA	NA	NA	NA	NA	NA	NA	NA	NA	NA
1437	common	chr5	117877869	117878206	4.03427	2.9086	52	22	NA	NA	NA	NA	NA	NA	0	NA	NA	NA	NA	NA	NA	NA	NA	NA	NA	NA	NA	NA	NA	NA	NA	NA	NA	NA	NA	NA	NA	NA	NA	NA	NA	NA	NA	NA	NA	NA	NA	NA	NA
1438	common	chr19	16606759	16607396	5.14145	4.17341	1313	632	4	16607102	16607124	GGTGTCATGGGAGCGGTAGTTC	9.41e-07	25	2	CALR3	-74	-	ND	ND	ND	ND	ND	ND	ND	C19orf44	45	+	protein_coding	2.35614	2.50843	2.95233	2.95977	0.444852	0.0647486	NA	NA	NA	NA	NA	NA	NA	NA	NA	NA	NA	NA	NA	NA
1439	common	chr7	5862558	5863113	4.60461	3.37237	373	197	5	5862758	5862780	GGGGTTCTGGGAGTTGTAGTCC	2.21e-10	12	1	ZNF815P	-44	+	pseudogene	1.64155	1.39506	1.98185	1.60881	0.367074	0.560344	NA	NA	NA	NA	NA	NA	NA	NA	NA	NA	NA	NA	NA	NA	NA	NA	NA	NA	NA	NA	NA	NA	NA	NA
1440	F80L absent	chr10	130269924	130270376	2.54678	0.340632	57	24	NA	NA	NA	NA	NA	NA	0	NA	NA	NA	NA	NA	NA	NA	NA	NA	NA	NA	NA	NA	NA	NA	NA	NA	NA	NA	NA	NA	NA	NA	NA	NA	NA	NA	NA	NA	NA	NA	NA	NA	NA
1441	common	chr9	136657137	136657665	2.11228	1.0725	130	50	2	136657382	136657404	TACTGGGTGGGGTGTGTGGTAT	0.000601	181	0	NA	NA	NA	NA	NA	NA	NA	NA	NA	NA	NA	NA	NA	NA	NA	NA	NA	NA	NA	NA	NA	NA	NA	NA	NA	NA	NA	NA	NA	NA	NA	NA	NA	NA
1442	common	chr2	242089399	242090081	4.48548	3.56272	975	452	1	242089753	242089775	CGCCTCATGGGAGTTGTAGTTC	2e-09	10	1	PASK	-61	-	protein_coding	3.29131	3.37573	3.29572	3.52482	-0.0040688	0.99114	NA	NA	NA	NA	NA	NA	NA	NA	NA	NA	NA	NA	NA	NA	NA	NA	NA	NA	NA	NA	NA	NA	NA	NA
1443	F80L absent	chr9	136377448	136377746	1.7266	0.465853	40	26	NA	NA	NA	NA	NA	NA	0	NA	NA	NA	NA	NA	NA	NA	NA	NA	NA	NA	NA	NA	NA	NA	NA	NA	NA	NA	NA	NA	NA	NA	NA	NA	NA	NA	NA	NA	NA	NA	NA	NA	NA
1444	F80L absent	chr17	38243406	38243748	1.42333	-0.0918347	46	27	NA	NA	NA	NA	NA	NA	0	NA	NA	NA	NA	NA	NA	NA	NA	NA	NA	NA	NA	NA	NA	NA	NA	NA	NA	NA	NA	NA	NA	NA	NA	NA	NA	NA	NA	NA	NA	NA	NA	NA	NA
1445	F80L absent	chr21	45789325	45789884	1.16993	0.755662	70	41	NA	NA	NA	NA	NA	NA	0	NA	NA	NA	NA	NA	NA	NA	NA	NA	NA	NA	NA	NA	NA	NA	NA	NA	NA	NA	NA	NA	NA	NA	NA	NA	NA	NA	NA	NA	NA	NA	NA	NA	NA
1446	common	chr19	49228040	49228565	3.46202	2.7241	218	122	3	49228249	49228271	AGCTTCCTGGGAGTTGTAGTCC	2.28e-10	9	0	NA	NA	NA	NA	NA	NA	NA	NA	NA	NA	NA	NA	NA	NA	NA	NA	NA	NA	NA	NA	NA	NA	NA	NA	NA	NA	NA	NA	NA	NA	NA	NA	NA	NA
1447	F80L absent	chr5	1562163	1562535	2.01338	0.899554	84	48	NA	NA	NA	NA	NA	NA	0	NA	NA	NA	NA	NA	NA	NA	NA	NA	NA	NA	NA	NA	NA	NA	NA	NA	NA	NA	NA	NA	NA	NA	NA	NA	NA	NA	NA	NA	NA	NA	NA	NA	NA
1448	common	chr12	56497984	56498559	4.92219	3.1938	654	294	5	56498251	56498273	GGCAGGCTGGGAATTGTAGTTC	1.15e-10	14	1	PA2G4	-168	+	protein_coding	7.78424	7.89306	7.75482	8.14287	0.00758366	0.98302	NA	NA	NA	NA	NA	NA	NA	NA	NA	NA	NA	NA	NA	NA	NA	NA	NA	NA	NA	NA	NA	NA	NA	NA
1449	common	chr16	67867629	67868094	3.40378	2.7267	214	99	4	67867856	67867878	AGCCCCACGGGAATTGTAGTTC	6.9e-09	19	0	NA	NA	NA	NA	NA	NA	NA	NA	NA	NA	NA	NA	NA	NA	NA	NA	NA	NA	NA	NA	NA	NA	NA	NA	NA	NA	NA	NA	NA	NA	NA	NA	NA	NA
1450	common	chr22	41681961	41682721	5.44215	4.66556	1671	820	5	41682350	41682372	TGCGCCATGGGACGGGTAGTTC	1.17e-06	24	1	RANGAP1	-86	-	protein_coding	6.15886	5.92339	5.29866	5.23764	-0.915945	4.42431e-06	NA	NA	NA	NA	NA	NA	NA	NA	NA	NA	NA	NA	NA	NA	NA	NA	NA	NA	NA	NA	NA	NA	NA	NA
1451	F80L absent	chr6	170370122	170371105	1.57555	0.434461	94	44	1	170370686	170370708	TGCATGGTGGTCATTGTCTCTT	0.000807	30	0	NA	NA	NA	NA	NA	NA	NA	NA	NA	NA	NA	NA	NA	NA	NA	NA	NA	NA	NA	NA	NA	NA	NA	NA	NA	NA	NA	NA	NA	NA	NA	NA	NA	NA
1452	common	chr15	63481342	63481835	4.6589	3.55955	423	183	1	63481598	63481620	GACTTCATGGGACTTGTAGTTC	1.64e-07	10	1	RAB8B	80	+	protein_coding	3.22342	2.96347	3.09761	3.26003	-0.113386	0.681389	NA	NA	NA	NA	NA	NA	NA	NA	NA	NA	NA	NA	NA	NA	NA	NA	NA	NA	NA	NA	NA	NA	NA	NA
1453	F80L absent	chr8	40677854	40678185	2.53142	1.15412	39	33	NA	NA	NA	NA	NA	NA	0	NA	NA	NA	NA	NA	NA	NA	NA	NA	NA	NA	NA	NA	NA	NA	NA	NA	NA	NA	NA	NA	NA	NA	NA	NA	NA	NA	NA	NA	NA	NA	NA	NA	NA
1454	common	chr16	57728492	57728954	3.0631	1.70879	126	53	6	57728661	57728683	AGGCTTCTGGGAAATGTAGTCT	4.83e-11	28	1	CCDC135	-18	+	ND	ND	ND	ND	ND	ND	ND	NA	NA	NA	NA	NA	NA	NA	NA	NA	NA	NA	NA	NA	NA	NA	NA	NA	NA	NA	NA	NA	NA	NA	NA
1455	common	chr8	927799	928589	1.83415	0.263654	113	34	8	928173	928195	TGGGTTCTGGTCTTTGGTGTTG	0.000253	20	0	NA	NA	NA	NA	NA	NA	NA	NA	NA	NA	NA	NA	NA	NA	NA	NA	NA	NA	NA	NA	NA	NA	NA	NA	NA	NA	NA	NA	NA	NA	NA	NA	NA	NA
1456	common	chr2	39004955	39005436	2.49699	1.4971	124	85	4	39005248	39005270	AGAGTCGCGGGACCTAGAGTGC	0.000243	3	0	NA	NA	NA	NA	NA	NA	NA	NA	NA	NA	NA	NA	NA	NA	NA	NA	NA	NA	NA	NA	NA	NA	NA	NA	NA	NA	NA	NA	NA	NA	NA	NA	NA	NA
1457	common	chr12	88535716	88536296	4.56162	3.63096	462	252	3	88535982	88536004	TGCACTCTGGGATTTGAAGTCC	3e-09	18	2	CEP290	-13	-	protein_coding	4.23419	4.04089	4.12598	4.13586	0.00475597	0.986711	TMTC3	67	+	protein_coding	5.01926	4.88411	5.25663	5.01302	0.18028	0.337689	NA	NA	NA	NA	NA	NA	NA	NA	NA	NA	NA	NA	NA	NA
1458	F80L absent	chr8	133904906	133905527	1.72776	0.81785	74	40	NA	NA	NA	NA	NA	NA	0	NA	NA	NA	NA	NA	NA	NA	NA	NA	NA	NA	NA	NA	NA	NA	NA	NA	NA	NA	NA	NA	NA	NA	NA	NA	NA	NA	NA	NA	NA	NA	NA	NA	NA
1459	common	chr14	77923734	77924461	4.34929	3.76859	508	310	4	77924055	77924077	GGGTTTCTGGGGGCTGTAGTCA	1.67e-07	23	2	VIPAS39	198	-	protein_coding	2.84197	2.852	2.70929	2.58736	-0.432237	0.0906587	AHSA1	116	+	protein_coding	7.83017	7.98874	7.41954	7.60622	-0.590461	1.46353e-06	NA	NA	NA	NA	NA	NA	NA	NA	NA	NA	NA	NA	NA	NA
1460	F80L absent	chr13	112733130	112733542	2.04052	1.05083	54	21	NA	NA	NA	NA	NA	NA	0	NA	NA	NA	NA	NA	NA	NA	NA	NA	NA	NA	NA	NA	NA	NA	NA	NA	NA	NA	NA	NA	NA	NA	NA	NA	NA	NA	NA	NA	NA	NA	NA	NA	NA
1461	F80L absent	chr16	57104600	57105952	1.64774	0.85398	79	29	NA	NA	NA	NA	NA	NA	0	NA	NA	NA	NA	NA	NA	NA	NA	NA	NA	NA	NA	NA	NA	NA	NA	NA	NA	NA	NA	NA	NA	NA	NA	NA	NA	NA	NA	NA	NA	NA	NA	NA	NA
1462	common	chr1	158119515	158119966	4.08529	3.41466	208	97	2	158119705	158119727	GGCACTATGGGTGTTGTAGTTT	5.09e-09	15	0	NA	NA	NA	NA	NA	NA	NA	NA	NA	NA	NA	NA	NA	NA	NA	NA	NA	NA	NA	NA	NA	NA	NA	NA	NA	NA	NA	NA	NA	NA	NA	NA	NA	NA
1463	common	chr14	24024995	24025555	3.80765	2.72233	339	170	1	24025183	24025205	TGCATGATGGGAGATGTAGTTC	1.43e-10	12	2	THTPA	-59	+	protein_coding	3.33199	3.16832	2.64616	2.6893	-0.501528	0.0381239	ZFHX2	126	-	ND	ND	ND	ND	ND	ND	ND	NA	NA	NA	NA	NA	NA	NA	NA	NA	NA	NA	NA	NA	NA
1464	F80L absent	chr8	135472921	135473912	2.13588	1.26143	104	69	NA	NA	NA	NA	NA	NA	0	NA	NA	NA	NA	NA	NA	NA	NA	NA	NA	NA	NA	NA	NA	NA	NA	NA	NA	NA	NA	NA	NA	NA	NA	NA	NA	NA	NA	NA	NA	NA	NA	NA	NA
1465	F80L absent	chr2	67440910	67441660	2.06276	0.346071	74	30	NA	NA	NA	NA	NA	NA	0	NA	NA	NA	NA	NA	NA	NA	NA	NA	NA	NA	NA	NA	NA	NA	NA	NA	NA	NA	NA	NA	NA	NA	NA	NA	NA	NA	NA	NA	NA	NA	NA	NA	NA
1466	F80L absent	chr9	93603437	93604393	2.07564	0.966862	94	58	NA	NA	NA	NA	NA	NA	0	NA	NA	NA	NA	NA	NA	NA	NA	NA	NA	NA	NA	NA	NA	NA	NA	NA	NA	NA	NA	NA	NA	NA	NA	NA	NA	NA	NA	NA	NA	NA	NA	NA	NA
1467	common	chr17	46907879	46908522	3.72584	2.20039	436	207	4	46908324	46908346	TGACCGTTGTGACGTGTGGGCG	0.000487	6	1	CALCOCO2	150	+	protein_coding	5.59694	5.59694	5.83036	6.06005	0.266096	0.0915767	NA	NA	NA	NA	NA	NA	NA	NA	NA	NA	NA	NA	NA	NA	NA	NA	NA	NA	NA	NA	NA	NA	NA	NA
1468	F80L absent	chr9	98330003	98330793	1.77884	0.844968	81	53	NA	NA	NA	NA	NA	NA	0	NA	NA	NA	NA	NA	NA	NA	NA	NA	NA	NA	NA	NA	NA	NA	NA	NA	NA	NA	NA	NA	NA	NA	NA	NA	NA	NA	NA	NA	NA	NA	NA	NA	NA
1469	F80L absent	chr19	52074409	52074649	2.2317	1.51017	23	13	NA	NA	NA	NA	NA	NA	1	ZNF175	22	+	protein_coding	2.73335	2.60644	2.94298	2.77821	0.113794	0.765572	NA	NA	NA	NA	NA	NA	NA	NA	NA	NA	NA	NA	NA	NA	NA	NA	NA	NA	NA	NA	NA	NA	NA	NA
1470	F80L absent	chr18	77306451	77306740	2.37218	1.2363	38	11	NA	NA	NA	NA	NA	NA	0	NA	NA	NA	NA	NA	NA	NA	NA	NA	NA	NA	NA	NA	NA	NA	NA	NA	NA	NA	NA	NA	NA	NA	NA	NA	NA	NA	NA	NA	NA	NA	NA	NA	NA
1471	common	chr2	20365497	20365936	2.09906	1.49476	83	39	1	20365516	20365538	TGTGTGATGTGTGTTTGAGTTT	0.000498	242	0	NA	NA	NA	NA	NA	NA	NA	NA	NA	NA	NA	NA	NA	NA	NA	NA	NA	NA	NA	NA	NA	NA	NA	NA	NA	NA	NA	NA	NA	NA	NA	NA	NA	NA
1472	F80L absent	chr17	72724427	72724741	2.53239	1.81454	44	22	1	72724475	72724497	TGTACTATGTGTATTTGTGTTT	0.000918	141	0	NA	NA	NA	NA	NA	NA	NA	NA	NA	NA	NA	NA	NA	NA	NA	NA	NA	NA	NA	NA	NA	NA	NA	NA	NA	NA	NA	NA	NA	NA	NA	NA	NA	NA
1473	F80L absent	chr17	12691833	12692189	1.40018	0.297465	56	34	3	12692011	12692033	TGGATCACGAGGTCAGGAGTTC	0.000402	40	0	NA	NA	NA	NA	NA	NA	NA	NA	NA	NA	NA	NA	NA	NA	NA	NA	NA	NA	NA	NA	NA	NA	NA	NA	NA	NA	NA	NA	NA	NA	NA	NA	NA	NA
1474	common	chr10	134177870	134178245	2.25264	0.417269	119	48	2	134177723	134177745	CTGCTGCTGGGAGTAAGAGGGT	0.000303	167	0	NA	NA	NA	NA	NA	NA	NA	NA	NA	NA	NA	NA	NA	NA	NA	NA	NA	NA	NA	NA	NA	NA	NA	NA	NA	NA	NA	NA	NA	NA	NA	NA	NA	NA
1475	F80L absent	chr7	69960560	69962301	1.94202	0.624265	184	105	NA	NA	NA	NA	NA	NA	0	NA	NA	NA	NA	NA	NA	NA	NA	NA	NA	NA	NA	NA	NA	NA	NA	NA	NA	NA	NA	NA	NA	NA	NA	NA	NA	NA	NA	NA	NA	NA	NA	NA	NA
1476	F80L absent	chr7	47513935	47514656	2.17397	0.714237	75	44	NA	NA	NA	NA	NA	NA	0	NA	NA	NA	NA	NA	NA	NA	NA	NA	NA	NA	NA	NA	NA	NA	NA	NA	NA	NA	NA	NA	NA	NA	NA	NA	NA	NA	NA	NA	NA	NA	NA	NA	NA
1477	common	chr1	27560587	27561224	4.34023	3.9585	690	326	4	27560869	27560891	GGGCGGGCGGGAAAGCTGGGCT	0.000142	10	2	RP11-40H20.4	-62	-	ND	ND	ND	ND	ND	ND	ND	WDTC1	102	+	protein_coding	3.45418	3.41278	3.49442	3.2555	-0.0676401	0.816861	NA	NA	NA	NA	NA	NA	NA	NA	NA	NA	NA	NA	NA	NA
1478	common	chr19	44668972	44669416	4.54205	3.52109	239	127	5	44669119	44669141	GGAATCCTGGGAACTGTAGGTC	1.13e-08	10	1	ZNF226	32	+	protein_coding	3.7866	3.70598	4.21179	4.18587	0.394386	0.0285421	NA	NA	NA	NA	NA	NA	NA	NA	NA	NA	NA	NA	NA	NA	NA	NA	NA	NA	NA	NA	NA	NA	NA	NA
1479	common	chr9	134955113	134955489	3.53477	2.30685	179	99	2	134955308	134955330	AGACCTCTGGGAAATGCAGTTC	2.5e-08	6	1	MED27	-6	-	protein_coding	4.65935	4.74792	4.62702	4.9331	0.0556913	0.906338	NA	NA	NA	NA	NA	NA	NA	NA	NA	NA	NA	NA	NA	NA	NA	NA	NA	NA	NA	NA	NA	NA	NA	NA
1480	common	chr17	7338160	7338852	3.40233	2.555	595	310	4	7338621	7338643	GTTATCCTGGGAGTTGTAGTTT	1.72e-08	25	1	TMEM102	256	+	protein_coding	1.24489	0.85599	1.16993	0.918386	-0.0421492	0.964141	NA	NA	NA	NA	NA	NA	NA	NA	NA	NA	NA	NA	NA	NA	NA	NA	NA	NA	NA	NA	NA	NA	NA	NA
1481	common	chr16	30102951	30103657	5.53906	4.26129	2786	1375	3	30103321	30103343	GGGCCGCTGGGAGTTGCAGTCC	7.29e-09	25	1	TBX6	-96	-	ND	ND	ND	ND	ND	ND	ND	NA	NA	NA	NA	NA	NA	NA	NA	NA	NA	NA	NA	NA	NA	NA	NA	NA	NA	NA	NA	NA	NA	NA	NA
1482	F80L absent	chr5	983673	984053	1.57458	0.532868	82	48	NA	NA	NA	NA	NA	NA	0	NA	NA	NA	NA	NA	NA	NA	NA	NA	NA	NA	NA	NA	NA	NA	NA	NA	NA	NA	NA	NA	NA	NA	NA	NA	NA	NA	NA	NA	NA	NA	NA	NA	NA
1483	F80L absent	chr2	131734651	131735298	2.0624	0.949422	54	35	NA	NA	NA	NA	NA	NA	0	NA	NA	NA	NA	NA	NA	NA	NA	NA	NA	NA	NA	NA	NA	NA	NA	NA	NA	NA	NA	NA	NA	NA	NA	NA	NA	NA	NA	NA	NA	NA	NA	NA	NA
1484	F80L absent	chr9	137651825	137652402	0.800026	0.290795	60	49	NA	NA	NA	NA	NA	NA	0	NA	NA	NA	NA	NA	NA	NA	NA	NA	NA	NA	NA	NA	NA	NA	NA	NA	NA	NA	NA	NA	NA	NA	NA	NA	NA	NA	NA	NA	NA	NA	NA	NA	NA
1485	common	chrX	48334155	48334611	3.42758	2.46556	206	98	6	48334517	48334539	TGCATGCCGGGAAACGCAGTTC	6.83e-08	45	1	FTSJ1	158	+	protein_coding	5.07125	4.9331	4.76924	4.79597	-0.264681	0.180859	NA	NA	NA	NA	NA	NA	NA	NA	NA	NA	NA	NA	NA	NA	NA	NA	NA	NA	NA	NA	NA	NA	NA	NA
1486	common	chr19	4065936	4066299	4.6759	4.3931	754	367	4	4066035	4066057	GGCACCCTGGGACTTGTAGTCC	2.81e-10	28	0	NA	NA	NA	NA	NA	NA	NA	NA	NA	NA	NA	NA	NA	NA	NA	NA	NA	NA	NA	NA	NA	NA	NA	NA	NA	NA	NA	NA	NA	NA	NA	NA	NA	NA
1487	common	chr19	57874526	57874895	3.16091	1.11064	92	41	2	57874657	57874679	TGTCTTCTGGGTTATGAAGTTT	3.61e-07	11	3	ZNF547	135	+	protein_coding	1.58015	1.71809	2.12433	1.77821	0.373378	0.406389	TRAPPC2P1	169	+	protein_coding	3.84699	3.97911	4.01257	3.99458	0.131603	0.782833	AC003002.4	224	+	ND	ND	ND	ND	ND	ND	ND	NA	NA	NA	NA
1488	F80L only	chr10	80785466	80786116	1.96988	0.406461	66	22	4	80785938	80785960	TGGTATCTGAGAGTGGTAATGT	9.88e-05	17	0	NA	NA	NA	NA	NA	NA	NA	NA	NA	NA	NA	NA	NA	NA	NA	NA	NA	NA	NA	NA	NA	NA	NA	NA	NA	NA	NA	NA	NA	NA	NA	NA	NA	NA
1489	common	chr4	8160577	8160934	4.6442	2.56364	336	124	3	8160714	8160736	AGCGTGCTGGGACTTGTAGTCC	1.32e-09	0	1	ABLIM2	-196	-	ND	ND	ND	ND	ND	ND	ND	NA	NA	NA	NA	NA	NA	NA	NA	NA	NA	NA	NA	NA	NA	NA	NA	NA	NA	NA	NA	NA	NA	NA	NA
1490	common	chr17	1619551	1620102	2.72538	2.24071	236	134	4	1619866	1619888	TGCATGCTGGTCCGTGTAGTTC	1.27e-06	21	1	WDR81	-9	+	protein_coding	3.18745	2.51096	2.82579	2.19535	-0.406884	0.397172	NA	NA	NA	NA	NA	NA	NA	NA	NA	NA	NA	NA	NA	NA	NA	NA	NA	NA	NA	NA	NA	NA	NA	NA
1491	common	chr6	42981630	42982120	3.96817	2.97199	338	167	4	42981898	42981920	GGCATTTCGGGACTTGTAGTCC	3.5e-09	52	2	MEA1	-169	-	protein_coding	5.83036	5.89603	5.90617	6.05702	0.0986821	0.728525	KLHDC3	76	+	protein_coding	6.11873	6.0365	5.91672	5.90472	-0.190811	0.192863	NA	NA	NA	NA	NA	NA	NA	NA	NA	NA	NA	NA	NA	NA
1492	common	chr19	58790027	58790787	3.43046	2.56017	441	226	2	58790305	58790327	GGCCTACTGGGAGTTGTAGTCG	1.62e-09	8	4	CTD-3138B18.5	-233	-	antisense	1.01436	0.704872	1.52105	1.54102	0.640248	0.125758	ZNF8	-90	+	protein_coding	3.07039	3.25248	3.46989	3.5509	0.323901	0.24189	ZNF8	-89	+	protein_coding	3.07039	3.25248	3.46989	3.5509	0.323901	0.24189	AC010642.1	-75	+	protein_coding
1493	F80L absent	chr13	33112836	33113225	3.68752	2.71581	85	48	4	33113034	33113056	TGGATTCTGGGAGACCTAGTCT	2.72e-08	17	1	N4BP2L2	-60	-	protein_coding	4.89142	5.00495	5.00495	5.09719	0.0249631	0.936717	NA	NA	NA	NA	NA	NA	NA	NA	NA	NA	NA	NA	NA	NA	NA	NA	NA	NA	NA	NA	NA	NA	NA	NA
1494	F80L absent	chr10	47638671	47639439	2.29937	1.14066	104	71	2	47638869	47638891	GTGTGTGTGGGATGTGTGGTGT	8.79e-05	52	0	NA	NA	NA	NA	NA	NA	NA	NA	NA	NA	NA	NA	NA	NA	NA	NA	NA	NA	NA	NA	NA	NA	NA	NA	NA	NA	NA	NA	NA	NA	NA	NA	NA	NA
1495	common	chr5	26235416	26236484	1.81693	0.613778	182	73	11	26235866	26235888	TGGTGGGTGGGTGTTGTGGTGG	5.24e-05	18	0	NA	NA	NA	NA	NA	NA	NA	NA	NA	NA	NA	NA	NA	NA	NA	NA	NA	NA	NA	NA	NA	NA	NA	NA	NA	NA	NA	NA	NA	NA	NA	NA	NA	NA
1496	F80L absent	chr21	41521162	41521888	2.04042	0.809195	72	30	NA	NA	NA	NA	NA	NA	0	NA	NA	NA	NA	NA	NA	NA	NA	NA	NA	NA	NA	NA	NA	NA	NA	NA	NA	NA	NA	NA	NA	NA	NA	NA	NA	NA	NA	NA	NA	NA	NA	NA	NA
1497	F80L only	chr11	125488971	125489375	0.439221	0.748695	15	33	4	125489023	125489045	TTGAACCGGGGAGGTGGAGGTT	0.000175	47	0	NA	NA	NA	NA	NA	NA	NA	NA	NA	NA	NA	NA	NA	NA	NA	NA	NA	NA	NA	NA	NA	NA	NA	NA	NA	NA	NA	NA	NA	NA	NA	NA	NA	NA
1498	common	chr9	130699945	130700401	3.61889	2.66254	285	132	5	130700176	130700198	AGCACGCCGGGAGTCGTAGTCC	6.65e-09	4	0	NA	NA	NA	NA	NA	NA	NA	NA	NA	NA	NA	NA	NA	NA	NA	NA	NA	NA	NA	NA	NA	NA	NA	NA	NA	NA	NA	NA	NA	NA	NA	NA	NA	NA
1499	common	chr1	155225044	155225659	4.49968	3.49846	744	346	4	155225320	155225342	TGCACCCCGGGAGTTGTAGTTC	6.95e-10	12	1	FAM189B	-77	-	protein_coding	3.44228	3.37016	2.90497	3.24336	-0.398736	0.243124	NA	NA	NA	NA	NA	NA	NA	NA	NA	NA	NA	NA	NA	NA	NA	NA	NA	NA	NA	NA	NA	NA	NA	NA
1500	common	chrX	70315510	70315781	3.64131	2.80119	156	72	2	70315664	70315686	AGCCAGTCGGGAAACCGAGTTC	2.17e-05	24	0	NA	NA	NA	NA	NA	NA	NA	NA	NA	NA	NA	NA	NA	NA	NA	NA	NA	NA	NA	NA	NA	NA	NA	NA	NA	NA	NA	NA	NA	NA	NA	NA	NA	NA
1501	common	chr18	56806692	56807270	4.77755	3.31132	537	280	5	56807036	56807058	GGGCGTCTGGGAATCGTAGTCT	7.07e-09	2	1	SEC11C	-272	+	protein_coding	6.54905	6.55873	6.74255	6.91444	0.241455	0.279782	NA	NA	NA	NA	NA	NA	NA	NA	NA	NA	NA	NA	NA	NA	NA	NA	NA	NA	NA	NA	NA	NA	NA	NA
1502	common	chr10	27530839	27531294	4.70044	3.91404	400	230	4	27531052	27531074	GGGCTTATGGGAAATGTAGTCC	2.08e-10	1	1	ACBD5	-7	-	protein_coding	4.53045	4.47703	4.74631	4.63052	0.127424	0.515306	NA	NA	NA	NA	NA	NA	NA	NA	NA	NA	NA	NA	NA	NA	NA	NA	NA	NA	NA	NA	NA	NA	NA	NA
1503	common	chr19	58837875	58838835	5.30338	3.81093	1752	827	5	58838344	58838366	AGGACGCCGGGAATTGTAGTCC	1.09e-09	7	1	ZSCAN22	30	+	protein_coding	1.45418	1.45418	1.9486	1.89918	0.446437	0.0738488	NA	NA	NA	NA	NA	NA	NA	NA	NA	NA	NA	NA	NA	NA	NA	NA	NA	NA	NA	NA	NA	NA	NA	NA
1504	F80L absent	chr6	168829458	168830271	1.96864	0.864059	102	54	NA	NA	NA	NA	NA	NA	0	NA	NA	NA	NA	NA	NA	NA	NA	NA	NA	NA	NA	NA	NA	NA	NA	NA	NA	NA	NA	NA	NA	NA	NA	NA	NA	NA	NA	NA	NA	NA	NA	NA	NA
1505	F80L absent	chr9	139464098	139464452	1.81873	0.634144	76	33	NA	NA	NA	NA	NA	NA	0	NA	NA	NA	NA	NA	NA	NA	NA	NA	NA	NA	NA	NA	NA	NA	NA	NA	NA	NA	NA	NA	NA	NA	NA	NA	NA	NA	NA	NA	NA	NA	NA	NA	NA
1506	F80L absent	chr11	128685147	128685602	2.58998	1.62449	53	28	2	128685365	128685387	GGGAGCCTGGGATTTGTAGTTT	5.05e-09	21	0	NA	NA	NA	NA	NA	NA	NA	NA	NA	NA	NA	NA	NA	NA	NA	NA	NA	NA	NA	NA	NA	NA	NA	NA	NA	NA	NA	NA	NA	NA	NA	NA	NA	NA
1507	common	chr16	11038045	11038628	5.396	4.58096	998	469	4	11038343	11038365	GGGGCGCTGGGAAATGCAGTTC	6.01e-08	6	1	CLEC16A	9	+	protein_coding	2.95977	3.19377	3.51349	3.41819	0.256149	0.289958	NA	NA	NA	NA	NA	NA	NA	NA	NA	NA	NA	NA	NA	NA	NA	NA	NA	NA	NA	NA	NA	NA	NA	NA
1508	F80L absent	chr22	49974152	49974701	2.30189	0.702614	66	36	NA	NA	NA	NA	NA	NA	0	NA	NA	NA	NA	NA	NA	NA	NA	NA	NA	NA	NA	NA	NA	NA	NA	NA	NA	NA	NA	NA	NA	NA	NA	NA	NA	NA	NA	NA	NA	NA	NA	NA	NA
1509	common	chr12	122985232	122985817	3.74026	2.73017	313	179	4	122985558	122985580	TGCATTCCGGGAGTTGTAGTCT	8.29e-11	17	1	ZCCHC8	-6	-	protein_coding	3.97361	4.15056	4.30012	4.24413	0.165436	0.525265	NA	NA	NA	NA	NA	NA	NA	NA	NA	NA	NA	NA	NA	NA	NA	NA	NA	NA	NA	NA	NA	NA	NA	NA
1510	common	chr19	37019167	37019957	4.17905	3.64401	552	316	3	37019593	37019615	CGCCTTCTGGGAAATGTAGTTC	7.59e-11	13	2	AC092295.4	-342	+	ND	ND	ND	ND	ND	ND	ND	ZNF260	0	-	protein_coding	3.69265	3.80529	4.47444	4.38336	0.709187	1.44321e-09	NA	NA	NA	NA	NA	NA	NA	NA	NA	NA	NA	NA	NA	NA
1511	F80L absent	chr6	10588896	10589611	1.53803	0.610636	63	45	NA	NA	NA	NA	NA	NA	0	NA	NA	NA	NA	NA	NA	NA	NA	NA	NA	NA	NA	NA	NA	NA	NA	NA	NA	NA	NA	NA	NA	NA	NA	NA	NA	NA	NA	NA	NA	NA	NA	NA	NA
1512	F80L only	chr1	161438794	161439493	2.03953	0.628031	67	27	2	161439264	161439286	CGCAAGCCGGGCCCTGAAGCCG	0.000853	175	0	NA	NA	NA	NA	NA	NA	NA	NA	NA	NA	NA	NA	NA	NA	NA	NA	NA	NA	NA	NA	NA	NA	NA	NA	NA	NA	NA	NA	NA	NA	NA	NA	NA	NA
1513	common	chr16	81779830	81780192	3.07213	2.73939	111	54	5	81780003	81780025	TGCATTCTGGGAAATGTAGTCG	1.19e-10	19	0	NA	NA	NA	NA	NA	NA	NA	NA	NA	NA	NA	NA	NA	NA	NA	NA	NA	NA	NA	NA	NA	NA	NA	NA	NA	NA	NA	NA	NA	NA	NA	NA	NA	NA
1514	F80L absent	chr10	35992827	35993164	3.30389	1.03568	30	22	NA	NA	NA	NA	NA	NA	0	NA	NA	NA	NA	NA	NA	NA	NA	NA	NA	NA	NA	NA	NA	NA	NA	NA	NA	NA	NA	NA	NA	NA	NA	NA	NA	NA	NA	NA	NA	NA	NA	NA	NA
1515	common	chr1	54518853	54519473	4.88502	3.7383	916	437	7	54519175	54519197	GTGCTGTCGGGAAAGTTGGTCT	7.88e-05	9	2	TMEM59	14	-	protein_coding	6.75716	6.89869	7.07114	7.10601	0.23833	0.129633	TCEANC2	97	+	protein_coding	2.85997	2.66448	3.55336	3.66448	0.739613	6.82813e-07	NA	NA	NA	NA	NA	NA	NA	NA	NA	NA	NA	NA	NA	NA
1516	F80L absent	chr9	91286834	91287825	2.23717	1.31563	117	77	6	91287413	91287435	TGTGGTGTGGTGTGTGTAGTGT	0.000739	28	0	NA	NA	NA	NA	NA	NA	NA	NA	NA	NA	NA	NA	NA	NA	NA	NA	NA	NA	NA	NA	NA	NA	NA	NA	NA	NA	NA	NA	NA	NA	NA	NA	NA	NA
1517	F80L absent	chr21	42384173	42385116	2.39768	1.05942	93	54	NA	NA	NA	NA	NA	NA	0	NA	NA	NA	NA	NA	NA	NA	NA	NA	NA	NA	NA	NA	NA	NA	NA	NA	NA	NA	NA	NA	NA	NA	NA	NA	NA	NA	NA	NA	NA	NA	NA	NA	NA
1518	F80L absent	chr14	106030194	106030497	2.18264	1.57949	38	18	NA	NA	NA	NA	NA	NA	0	NA	NA	NA	NA	NA	NA	NA	NA	NA	NA	NA	NA	NA	NA	NA	NA	NA	NA	NA	NA	NA	NA	NA	NA	NA	NA	NA	NA	NA	NA	NA	NA	NA	NA
1519	F80L only	chr4	1651663	1652479	0.552154	-0.332227	39	15	1	1652333	1652355	AGCTACTTGGGAGGCTGAGTCA	0.000331	226	0	NA	NA	NA	NA	NA	NA	NA	NA	NA	NA	NA	NA	NA	NA	NA	NA	NA	NA	NA	NA	NA	NA	NA	NA	NA	NA	NA	NA	NA	NA	NA	NA	NA	NA
1520	F80L absent	chr1	53565799	53566265	2.30636	2.21741	58	31	NA	NA	NA	NA	NA	NA	0	NA	NA	NA	NA	NA	NA	NA	NA	NA	NA	NA	NA	NA	NA	NA	NA	NA	NA	NA	NA	NA	NA	NA	NA	NA	NA	NA	NA	NA	NA	NA	NA	NA	NA
1521	common	chr2	197503976	197504641	5.84152	4.08058	1006	529	3	197504348	197504370	GGCATGTCGGGAACTGTAGTTT	6.65e-09	55	1	CCDC150	-30	+	protein_coding	3.83895	4.28836	4.60644	4.60229	0.608602	0.00293543	NA	NA	NA	NA	NA	NA	NA	NA	NA	NA	NA	NA	NA	NA	NA	NA	NA	NA	NA	NA	NA	NA	NA	NA
1522	F80L absent	chr15	98544011	98544814	2.16014	0.998933	86	46	2	98544255	98544277	AGGTGTGTGAGTGGTGTAGGTG	0.000491	7	0	NA	NA	NA	NA	NA	NA	NA	NA	NA	NA	NA	NA	NA	NA	NA	NA	NA	NA	NA	NA	NA	NA	NA	NA	NA	NA	NA	NA	NA	NA	NA	NA	NA	NA
1523	common	chr1	156052016	156052738	4.65233	3.53292	929	470	6	156052321	156052343	GGCATGCCGGGAGTTGTAGTTT	6.14e-11	7	2	MEX3A	-588	-	protein_coding	1.71809	1.9855	2.90304	2.92979	1.04774	1.23796e-09	LMNA	-13	+	protein_coding	4.41886	4.09085	4.41549	4.29425	-0.260013	0.603346	NA	NA	NA	NA	NA	NA	NA	NA	NA	NA	NA	NA	NA	NA
1524	common	chr1	110026130	110026507	2.86944	2.37708	170	73	4	110026382	110026404	AGCCTTCTGGGAAGTGTAGTCT	8.29e-11	37	1	ATXN7L2	-217	+	protein_coding	1.74416	1.60407	1.86394	1.54597	0.187195	0.670355	NA	NA	NA	NA	NA	NA	NA	NA	NA	NA	NA	NA	NA	NA	NA	NA	NA	NA	NA	NA	NA	NA	NA	NA
1525	common	chr3	113775104	113775658	3.75107	3.53409	325	163	4	113775381	113775403	GTCACGCTGGGAATTGTAGTTC	1.13e-09	10	1	KIAA1407	79	-	ND	ND	ND	ND	ND	ND	ND	NA	NA	NA	NA	NA	NA	NA	NA	NA	NA	NA	NA	NA	NA	NA	NA	NA	NA	NA	NA	NA	NA	NA	NA
1526	common	chr22	43891412	43892912	1.43928	0.0457988	164	81	4	43892048	43892070	GTGATGGTGGAGGTGGTGGTGG	0.000632	68	0	NA	NA	NA	NA	NA	NA	NA	NA	NA	NA	NA	NA	NA	NA	NA	NA	NA	NA	NA	NA	NA	NA	NA	NA	NA	NA	NA	NA	NA	NA	NA	NA	NA	NA
1527	common	chr16	30709161	30709620	3.85026	2.64033	480	261	2	30709370	30709392	GGCAGCCTGGGAGGTGTAGTCT	4.21e-09	17	1	SRCAP	140	+	protein_coding	3.3505	3.75168	3.44361	3.80323	0.125083	0.914225	NA	NA	NA	NA	NA	NA	NA	NA	NA	NA	NA	NA	NA	NA	NA	NA	NA	NA	NA	NA	NA	NA	NA	NA
1528	common	chr9	104160776	104161322	4.95382	4.19081	381	204	2	104161060	104161082	AGCATGACGGGAGTTGTAGTTG	1.15e-08	8	2	MRPL50	-153	-	protein_coding	4.07895	4.24031	4.20085	4.09424	-0.0304248	0.924511	ZNF189	106	+	protein_coding	3.56925	3.72356	3.87971	3.75489	0.140013	0.603624	NA	NA	NA	NA	NA	NA	NA	NA	NA	NA	NA	NA	NA	NA
1529	F80L absent	chr22	45687041	45687888	2.01722	0.942023	123	52	NA	NA	NA	NA	NA	NA	0	NA	NA	NA	NA	NA	NA	NA	NA	NA	NA	NA	NA	NA	NA	NA	NA	NA	NA	NA	NA	NA	NA	NA	NA	NA	NA	NA	NA	NA	NA	NA	NA	NA	NA
1530	F80L absent	chr22	48978184	48980601	1.64185	1.13106	251	158	3	48980065	48980087	TGTGTGGTGTGTGATGTATTTT	0.000282	15	0	NA	NA	NA	NA	NA	NA	NA	NA	NA	NA	NA	NA	NA	NA	NA	NA	NA	NA	NA	NA	NA	NA	NA	NA	NA	NA	NA	NA	NA	NA	NA	NA	NA	NA
1531	common	chr2	239142730	239143233	4.6954	2.98844	281	154	3	239143019	239143041	GGCCTCCTGGGAGATGTAGTTC	1.65e-11	24	0	NA	NA	NA	NA	NA	NA	NA	NA	NA	NA	NA	NA	NA	NA	NA	NA	NA	NA	NA	NA	NA	NA	NA	NA	NA	NA	NA	NA	NA	NA	NA	NA	NA	NA
1532	common	chr7	42971731	42972093	3.50057	2.97023	128	64	2	42971880	42971902	AGCATGCGGGGTGTTGTAGTTC	4.31e-08	17	3	PSMA2	-139	-	protein_coding	3.41007	3.52356	3.41819	3.46597	-0.049484	0.89986	PSMA2	-90	-	protein_coding	3.41007	3.52356	3.41819	3.46597	-0.049484	0.89986	MRPL32	-113	+	protein_coding	5.8622	6.04396	5.88704	6.14037	0.0281547	0.946128	NA	NA	NA	NA
1533	common	chr10	75544892	75545395	3.75489	3.0285	225	134	6	75545366	75545388	CGGCGGCTGGGGCCTCTAGGCG	0.000252	58	1	ZSWIM8	197	+	protein_coding	4.34127	4.10182	4.68313	4.33342	0.207656	0.427198	NA	NA	NA	NA	NA	NA	NA	NA	NA	NA	NA	NA	NA	NA	NA	NA	NA	NA	NA	NA	NA	NA	NA	NA
1534	F80L absent	chr8	133508094	133508642	2.38123	0.810933	70	48	2	133508327	133508349	TGTAGTGTGGGAAGTGTATGTG	6.73e-05	81	0	NA	NA	NA	NA	NA	NA	NA	NA	NA	NA	NA	NA	NA	NA	NA	NA	NA	NA	NA	NA	NA	NA	NA	NA	NA	NA	NA	NA	NA	NA	NA	NA	NA	NA
1535	F80L absent	chr17	70553781	70554052	2.56615	1.42435	43	18	NA	NA	NA	NA	NA	NA	0	NA	NA	NA	NA	NA	NA	NA	NA	NA	NA	NA	NA	NA	NA	NA	NA	NA	NA	NA	NA	NA	NA	NA	NA	NA	NA	NA	NA	NA	NA	NA	NA	NA	NA
1536	F80L absent	chr14	104681422	104681772	2.32083	0.826757	49	24	NA	NA	NA	NA	NA	NA	0	NA	NA	NA	NA	NA	NA	NA	NA	NA	NA	NA	NA	NA	NA	NA	NA	NA	NA	NA	NA	NA	NA	NA	NA	NA	NA	NA	NA	NA	NA	NA	NA	NA	NA
1537	F80L absent	chr2	53109906	53110435	2.50017	1.82362	36	17	NA	NA	NA	NA	NA	NA	1	AC010967.1	211	+	ND	ND	ND	ND	ND	ND	ND	NA	NA	NA	NA	NA	NA	NA	NA	NA	NA	NA	NA	NA	NA	NA	NA	NA	NA	NA	NA	NA	NA	NA	NA
1538	F80L absent	chr21	42550970	42551573	1.69795	0.604862	46	29	NA	NA	NA	NA	NA	NA	0	NA	NA	NA	NA	NA	NA	NA	NA	NA	NA	NA	NA	NA	NA	NA	NA	NA	NA	NA	NA	NA	NA	NA	NA	NA	NA	NA	NA	NA	NA	NA	NA	NA	NA
1539	common	chr1	28908261	28908783	4.44913	3.30602	808	452	2	28908464	28908486	AGCTGCCTGGGAGTTGTAGTTT	7.13e-09	16	0	NA	NA	NA	NA	NA	NA	NA	NA	NA	NA	NA	NA	NA	NA	NA	NA	NA	NA	NA	NA	NA	NA	NA	NA	NA	NA	NA	NA	NA	NA	NA	NA	NA	NA
1540	common	chr9	82186463	82186982	4.35591	3.03689	347	177	2	82186712	82186734	GGCGGGCCGGTGATTGTAGTCA	3.12e-05	7	1	TLE4	-34	+	protein_coding	4.71918	4.93546	5.08023	5.27016	0.158571	0.478886	NA	NA	NA	NA	NA	NA	NA	NA	NA	NA	NA	NA	NA	NA	NA	NA	NA	NA	NA	NA	NA	NA	NA	NA
1541	F80L absent	chr20	35192755	35193223	2.85636	2.51553	51	45	NA	NA	NA	NA	NA	NA	0	NA	NA	NA	NA	NA	NA	NA	NA	NA	NA	NA	NA	NA	NA	NA	NA	NA	NA	NA	NA	NA	NA	NA	NA	NA	NA	NA	NA	NA	NA	NA	NA	NA	NA
1542	common	chr3	23958239	23958770	4.62981	3.03279	473	251	3	23958532	23958554	AGCGTCATGGGACATGTAGTTC	2.4e-08	7	1	RPL15	-468	+	protein_coding	10.1264	9.97662	9.87794	9.83373	-0.159864	0.148586	NA	NA	NA	NA	NA	NA	NA	NA	NA	NA	NA	NA	NA	NA	NA	NA	NA	NA	NA	NA	NA	NA	NA	NA
1543	F80L absent	chr18	23083669	23084040	3.68797	1.96385	70	42	3	23083841	23083863	GGAATTCTGGGAAATGTAGTTC	2.9e-11	26	0	NA	NA	NA	NA	NA	NA	NA	NA	NA	NA	NA	NA	NA	NA	NA	NA	NA	NA	NA	NA	NA	NA	NA	NA	NA	NA	NA	NA	NA	NA	NA	NA	NA	NA
1544	common	chr2	73298786	73299183	3.30638	2.20276	164	88	5	73298944	73298966	GGCGTTGTGGGGAGTGTAGTTT	8.72e-08	1	0	NA	NA	NA	NA	NA	NA	NA	NA	NA	NA	NA	NA	NA	NA	NA	NA	NA	NA	NA	NA	NA	NA	NA	NA	NA	NA	NA	NA	NA	NA	NA	NA	NA	NA
1545	common	chr6	170775182	170776631	1.59549	0.644669	123	41	NA	NA	NA	NA	NA	NA	0	NA	NA	NA	NA	NA	NA	NA	NA	NA	NA	NA	NA	NA	NA	NA	NA	NA	NA	NA	NA	NA	NA	NA	NA	NA	NA	NA	NA	NA	NA	NA	NA	NA	NA
1546	F80L absent	chr1	32043862	32044817	1.10634	0.478921	67	40	NA	NA	NA	NA	NA	NA	0	NA	NA	NA	NA	NA	NA	NA	NA	NA	NA	NA	NA	NA	NA	NA	NA	NA	NA	NA	NA	NA	NA	NA	NA	NA	NA	NA	NA	NA	NA	NA	NA	NA	NA
1547	common	chr13	30880917	30881553	4.24526	3.08521	892	489	7	30881270	30881292	TGCATCATGGGAATTGTAGTTC	1.14e-10	7	1	KATNAL1	386	-	protein_coding	3.12102	3.33914	3.41684	3.48027	0.182066	0.421765	NA	NA	NA	NA	NA	NA	NA	NA	NA	NA	NA	NA	NA	NA	NA	NA	NA	NA	NA	NA	NA	NA	NA	NA
1548	common	chr16	58664184	58664696	3.79293	2.97353	163	98	2	58664466	58664488	TGCATGCTGGGGGTTGTAGTCA	5.34e-09	13	0	NA	NA	NA	NA	NA	NA	NA	NA	NA	NA	NA	NA	NA	NA	NA	NA	NA	NA	NA	NA	NA	NA	NA	NA	NA	NA	NA	NA	NA	NA	NA	NA	NA	NA
1549	common	chr1	54303841	54304531	4.67284	3.78874	705	365	4	54304235	54304257	TGCATGCTGGGAACTGTAGTCT	8.06e-11	15	1	NDC1	347	-	protein_coding	6.25418	6.25814	6.61132	6.51602	0.225763	0.098132	NA	NA	NA	NA	NA	NA	NA	NA	NA	NA	NA	NA	NA	NA	NA	NA	NA	NA	NA	NA	NA	NA	NA	NA
1550	common	chr6	105307431	105308069	4.27933	3.26128	875	448	2	105307786	105307808	GGCCTTCTGGGAACTGTAGTTT	2.95e-11	3	1	HACE1	44	-	protein_coding	3.81558	3.65306	3.82069	3.77189	0.0554834	0.846966	NA	NA	NA	NA	NA	NA	NA	NA	NA	NA	NA	NA	NA	NA	NA	NA	NA	NA	NA	NA	NA	NA	NA	NA
1551	common	chr6	166207762	166208123	2.67543	1.01323	77	38	2	166207547	166207569	AGGAGGCTGGAGCATGCAGTCA	0.00011	54	0	NA	NA	NA	NA	NA	NA	NA	NA	NA	NA	NA	NA	NA	NA	NA	NA	NA	NA	NA	NA	NA	NA	NA	NA	NA	NA	NA	NA	NA	NA	NA	NA	NA	NA
1552	common	chr20	2489352	2489983	4.78145	3.73469	305	171	5	2489568	2489590	AGGATGTTGGGAATTGTAGTTC	3.91e-10	38	1	RP4-734P14.4	-114	-	ND	ND	ND	ND	ND	ND	ND	NA	NA	NA	NA	NA	NA	NA	NA	NA	NA	NA	NA	NA	NA	NA	NA	NA	NA	NA	NA	NA	NA	NA	NA
1553	common	chr1	202317388	202318022	4.13412	3.26933	509	267	4	202317756	202317778	GTCATCACGGGACTCGTAGTAA	3.18e-05	16	1	PPP1R12B	122	+	protein_coding	2.90881	3.11103	3.23879	3.71809	0.259713	0.244275	NA	NA	NA	NA	NA	NA	NA	NA	NA	NA	NA	NA	NA	NA	NA	NA	NA	NA	NA	NA	NA	NA	NA	NA
1554	common	chr19	19030027	19030671	4.01497	3.15146	502	273	3	19030325	19030347	AGCATCTCGGGAATTGTAGTGT	3.31e-08	39	2	COPE	-143	-	protein_coding	6.6978	5.88484	5.82248	5.41312	-0.719778	0.0643991	DDX49	135	+	protein_coding	5.63865	5.66306	5.62644	5.77873	-0.399767	0.266515	NA	NA	NA	NA	NA	NA	NA	NA	NA	NA	NA	NA	NA	NA
1555	common	chr18	9475034	9475625	5.26899	4.28324	1302	674	4	9475374	9475396	GGCGCGCTGGGAGGCGTAGTTC	2.84e-08	17	1	RALBP1	-322	+	protein_coding	4.96301	4.93452	5.23764	5.26978	0.196725	0.192509	NA	NA	NA	NA	NA	NA	NA	NA	NA	NA	NA	NA	NA	NA	NA	NA	NA	NA	NA	NA	NA	NA	NA	NA
1556	common	chr19	46366173	46367044	4.62444	3.5391	1193	639	5	46366437	46366459	GGGCCGCCGGGAAATGGAGTCC	1.31e-08	61	2	SYMPK	-60	-	protein_coding	4.66107	4.42291	4.48414	4.40735	-0.282883	0.194989	FOXA3	639	+	ND	ND	ND	ND	ND	ND	ND	NA	NA	NA	NA	NA	NA	NA	NA	NA	NA	NA	NA	NA	NA
1557	F80L absent	chr17	74543728	74544392	1.89881	0.649588	89	43	NA	NA	NA	NA	NA	NA	0	NA	NA	NA	NA	NA	NA	NA	NA	NA	NA	NA	NA	NA	NA	NA	NA	NA	NA	NA	NA	NA	NA	NA	NA	NA	NA	NA	NA	NA	NA	NA	NA	NA	NA
1558	common	chr5	6447966	6448005	1.95321	1.06871	36	34	1	6448086	6448108	TGGTGTGTGGTGTGTGTGGTGT	0.000776	109	0	NA	NA	NA	NA	NA	NA	NA	NA	NA	NA	NA	NA	NA	NA	NA	NA	NA	NA	NA	NA	NA	NA	NA	NA	NA	NA	NA	NA	NA	NA	NA	NA	NA	NA
1559	common	chr3	197186558	197186782	1.33133	0.169094	94	52	NA	NA	NA	NA	NA	NA	0	NA	NA	NA	NA	NA	NA	NA	NA	NA	NA	NA	NA	NA	NA	NA	NA	NA	NA	NA	NA	NA	NA	NA	NA	NA	NA	NA	NA	NA	NA	NA	NA	NA	NA
1560	F80L absent	chr3	185843004	185843976	1.54549	1.02034	115	81	7	185843217	185843239	TGTATAGTGGTGATGGTGGTGT	0.000443	9	0	NA	NA	NA	NA	NA	NA	NA	NA	NA	NA	NA	NA	NA	NA	NA	NA	NA	NA	NA	NA	NA	NA	NA	NA	NA	NA	NA	NA	NA	NA	NA	NA	NA	NA
1561	common	chr20	61602845	61603527	2.55724	1.35473	104	49	NA	NA	NA	NA	NA	NA	0	NA	NA	NA	NA	NA	NA	NA	NA	NA	NA	NA	NA	NA	NA	NA	NA	NA	NA	NA	NA	NA	NA	NA	NA	NA	NA	NA	NA	NA	NA	NA	NA	NA	NA
1562	F80L absent	chr2	239034825	239035678	2.58932	1.24276	91	59	1	239035414	239035436	GTGATTCTGTGTGATTGTGTTT	0.000625	250	0	NA	NA	NA	NA	NA	NA	NA	NA	NA	NA	NA	NA	NA	NA	NA	NA	NA	NA	NA	NA	NA	NA	NA	NA	NA	NA	NA	NA	NA	NA	NA	NA	NA	NA
1563	F80L absent	chr20	62784815	62785321	1.69321	0.583763	76	37	NA	NA	NA	NA	NA	NA	0	NA	NA	NA	NA	NA	NA	NA	NA	NA	NA	NA	NA	NA	NA	NA	NA	NA	NA	NA	NA	NA	NA	NA	NA	NA	NA	NA	NA	NA	NA	NA	NA	NA	NA
1564	common	chr19	3434930	3435621	5.44154	4.50203	1641	807	2	3435259	3435281	TGGCTGCCGGAAGACGTAGTTC	2.33e-07	29	0	NA	NA	NA	NA	NA	NA	NA	NA	NA	NA	NA	NA	NA	NA	NA	NA	NA	NA	NA	NA	NA	NA	NA	NA	NA	NA	NA	NA	NA	NA	NA	NA	NA	NA
1565	F80L absent	chr9	135999068	135999721	2.16569	0.942808	126	81	NA	NA	NA	NA	NA	NA	0	NA	NA	NA	NA	NA	NA	NA	NA	NA	NA	NA	NA	NA	NA	NA	NA	NA	NA	NA	NA	NA	NA	NA	NA	NA	NA	NA	NA	NA	NA	NA	NA	NA	NA
1566	F80L absent	chr2	85056553	85057118	1.92507	1.32221	69	46	NA	NA	NA	NA	NA	NA	0	NA	NA	NA	NA	NA	NA	NA	NA	NA	NA	NA	NA	NA	NA	NA	NA	NA	NA	NA	NA	NA	NA	NA	NA	NA	NA	NA	NA	NA	NA	NA	NA	NA	NA
1567	common	chr4	186346818	186347437	3.55126	3.37668	383	214	2	186347128	186347150	AGCATGTCGGGAGTTGTAGTTG	1.79e-08	12	2	UFSP2	12	-	protein_coding	3.9514	4.33985	4.48478	4.59515	0.281679	0.255385	C4orf47	267	+	ND	ND	ND	ND	ND	ND	ND	NA	NA	NA	NA	NA	NA	NA	NA	NA	NA	NA	NA	NA	NA
1568	common	chr19	4791199	4792003	5.62418	4.4747	1918	1127	5	4791615	4791637	GGCCTTTGGGGAAGTGTAGTCT	8.17e-08	14	2	AC005523.3	-382	-	ND	ND	ND	ND	ND	ND	ND	FEM1A	127	+	protein_coding	2.43829	0.879706	0.613532	-0.37707	-1.7028	0.0156817	NA	NA	NA	NA	NA	NA	NA	NA	NA	NA	NA	NA	NA	NA
1569	F80L only	chr6	371156	372156	-0.110412	-0.971895	78	68	NA	NA	NA	NA	NA	NA	0	NA	NA	NA	NA	NA	NA	NA	NA	NA	NA	NA	NA	NA	NA	NA	NA	NA	NA	NA	NA	NA	NA	NA	NA	NA	NA	NA	NA	NA	NA	NA	NA	NA	NA
1570	common	chr2	180871780	180872259	4.03634	3.39855	156	88	3	180872110	180872132	TGTACGATGGGAATTGTAGTTC	4.78e-09	31	1	CWC22	-179	-	protein_coding	4.47768	4.38474	4.48414	4.59574	0.0705402	0.793655	NA	NA	NA	NA	NA	NA	NA	NA	NA	NA	NA	NA	NA	NA	NA	NA	NA	NA	NA	NA	NA	NA	NA	NA
1571	F80L only	chr3	129234789	129236034	1.03015	-0.219277	62	18	NA	NA	NA	NA	NA	NA	0	NA	NA	NA	NA	NA	NA	NA	NA	NA	NA	NA	NA	NA	NA	NA	NA	NA	NA	NA	NA	NA	NA	NA	NA	NA	NA	NA	NA	NA	NA	NA	NA	NA	NA
1572	F80L absent	chr8	139877622	139878275	2.67189	1.76228	67	36	NA	NA	NA	NA	NA	NA	0	NA	NA	NA	NA	NA	NA	NA	NA	NA	NA	NA	NA	NA	NA	NA	NA	NA	NA	NA	NA	NA	NA	NA	NA	NA	NA	NA	NA	NA	NA	NA	NA	NA	NA
1573	common	chr15	41099298	41100039	4.64358	3.23642	403	251	3	41099723	41099745	AGCCCTCTGGGAATTGTGTTCT	7.35e-08	8	2	ZFYVE19	-384	+	protein_coding	2.74416	2.5656	2.76341	2.78869	-0.0330174	0.954656	DNAJC17	7	-	protein_coding	3.27053	2.9855	3.2854	3.4019	0.215729	0.670224	NA	NA	NA	NA	NA	NA	NA	NA	NA	NA	NA	NA	NA	NA
1574	common	chr7	99102039	99102609	3.82919	3.14848	445	240	2	99102255	99102277	CACCTCCTGGGAGATGTAGTTC	2.46e-08	11	1	ZKSCAN5	-50	+	protein_coding	3.24945	3.12267	3.37156	3.31759	0.132906	0.579496	NA	NA	NA	NA	NA	NA	NA	NA	NA	NA	NA	NA	NA	NA	NA	NA	NA	NA	NA	NA	NA	NA	NA	NA
1575	F80L only	chr2	74753467	74753822	2.4785	1.90454	33	21	4	74753463	74753485	CTCAGTGTGGTAGCTGGAGCCT	0.000706	21	1	DQX1	-181	-	ND	ND	ND	ND	ND	ND	ND	NA	NA	NA	NA	NA	NA	NA	NA	NA	NA	NA	NA	NA	NA	NA	NA	NA	NA	NA	NA	NA	NA	NA	NA
1576	common	chr19	36236134	36236613	3.765	2.25747	210	109	4	36236344	36236366	GGAGCACTGGGAAGTGTAGTTC	1.02e-07	37	4	AD000671.6	-40	-	ND	ND	ND	ND	ND	ND	ND	U2AF1L4	-27	-	protein_coding	2.28983	2.43029	2.67582	2.84197	0.274917	0.654491	PSENEN	-358	+	protein_coding	5.51633	5.65907	5.34873	5.59305	-0.0932903	0.82118	AC002398.9	206	+	protein_coding
1577	common	chr4	18023564	18024154	4.66136	3.37413	422	242	3	18023789	18023811	TGGAGCCTGGGAAGTGAAGTCT	1.55e-07	20	1	LCORL	-360	-	protein_coding	3.43029	3.46467	3.80323	3.63691	0.316236	0.0478088	NA	NA	NA	NA	NA	NA	NA	NA	NA	NA	NA	NA	NA	NA	NA	NA	NA	NA	NA	NA	NA	NA	NA	NA
1578	F80L absent	chr5	584473	584833	1.51223	0.0342618	78	39	NA	NA	NA	NA	NA	NA	0	NA	NA	NA	NA	NA	NA	NA	NA	NA	NA	NA	NA	NA	NA	NA	NA	NA	NA	NA	NA	NA	NA	NA	NA	NA	NA	NA	NA	NA	NA	NA	NA	NA	NA
1579	common	chr17	76209814	76210518	4.02089	3.18037	984	492	6	76210233	76210255	GGTGTGCCGGGAGTTGTAGTCC	1.8e-08	11	1	BIRC5	101	+	protein_coding	6.52199	6.47865	6.44593	6.5097	-0.0578783	0.786387	NA	NA	NA	NA	NA	NA	NA	NA	NA	NA	NA	NA	NA	NA	NA	NA	NA	NA	NA	NA	NA	NA	NA	NA
1580	common	chr11	1016729	1017941	2.34854	1.17301	233	146	8	1016951	1016973	GGGGTTCTGGTGCCTGTACTGG	0.000373	80	0	NA	NA	NA	NA	NA	NA	NA	NA	NA	NA	NA	NA	NA	NA	NA	NA	NA	NA	NA	NA	NA	NA	NA	NA	NA	NA	NA	NA	NA	NA	NA	NA	NA	NA
1581	F80L absent	chr13	112594217	112594781	1.63055	0.733139	49	32	NA	NA	NA	NA	NA	NA	0	NA	NA	NA	NA	NA	NA	NA	NA	NA	NA	NA	NA	NA	NA	NA	NA	NA	NA	NA	NA	NA	NA	NA	NA	NA	NA	NA	NA	NA	NA	NA	NA	NA	NA
1582	common	chr9	135252780	135253643	1.54244	0.865321	101	49	NA	NA	NA	NA	NA	NA	0	NA	NA	NA	NA	NA	NA	NA	NA	NA	NA	NA	NA	NA	NA	NA	NA	NA	NA	NA	NA	NA	NA	NA	NA	NA	NA	NA	NA	NA	NA	NA	NA	NA	NA
1583	F80L absent	chr9	137739155	137739676	1.43891	0.687259	74	37	NA	NA	NA	NA	NA	NA	0	NA	NA	NA	NA	NA	NA	NA	NA	NA	NA	NA	NA	NA	NA	NA	NA	NA	NA	NA	NA	NA	NA	NA	NA	NA	NA	NA	NA	NA	NA	NA	NA	NA	NA
1584	F80L absent	chr9	132410089	132410493	1.69836	0.677171	74	44	1	132409856	132409878	GAACTGATGAGACTTGTTGAGC	0.000912	237	0	NA	NA	NA	NA	NA	NA	NA	NA	NA	NA	NA	NA	NA	NA	NA	NA	NA	NA	NA	NA	NA	NA	NA	NA	NA	NA	NA	NA	NA	NA	NA	NA	NA	NA
1585	F80L absent	chr16	88086712	88087869	1.2401	0.821581	89	46	NA	NA	NA	NA	NA	NA	0	NA	NA	NA	NA	NA	NA	NA	NA	NA	NA	NA	NA	NA	NA	NA	NA	NA	NA	NA	NA	NA	NA	NA	NA	NA	NA	NA	NA	NA	NA	NA	NA	NA	NA
1586	F80L absent	chr21	38986730	38987147	2.41202	1.20379	50	40	NA	NA	NA	NA	NA	NA	0	NA	NA	NA	NA	NA	NA	NA	NA	NA	NA	NA	NA	NA	NA	NA	NA	NA	NA	NA	NA	NA	NA	NA	NA	NA	NA	NA	NA	NA	NA	NA	NA	NA	NA
1587	common	chr14	21571549	21572011	4.29077	2.67367	223	127	3	21571812	21571834	GGCATCCTGGGACTTGTAGTCT	8.94e-11	3	0	NA	NA	NA	NA	NA	NA	NA	NA	NA	NA	NA	NA	NA	NA	NA	NA	NA	NA	NA	NA	NA	NA	NA	NA	NA	NA	NA	NA	NA	NA	NA	NA	NA	NA
1588	common	chr17	76250345	76251023	5.41589	4.23508	1820	912	5	76250651	76250673	GGCACGCTGGGAGTTGTAGTTC	1.27e-11	23	1	THA1P	-187	-	ND	ND	ND	ND	ND	ND	ND	NA	NA	NA	NA	NA	NA	NA	NA	NA	NA	NA	NA	NA	NA	NA	NA	NA	NA	NA	NA	NA	NA	NA	NA
1589	common	chr22	35739030	35739455	2.02156	1.04885	78	48	11	35739032	35739054	TGTATGAGTGGAGGTGTGGTGT	0.000302	14	0	NA	NA	NA	NA	NA	NA	NA	NA	NA	NA	NA	NA	NA	NA	NA	NA	NA	NA	NA	NA	NA	NA	NA	NA	NA	NA	NA	NA	NA	NA	NA	NA	NA	NA
1590	F80L absent	chr2	6287404	6287815	2.74824	1.15024	37	25	NA	NA	NA	NA	NA	NA	0	NA	NA	NA	NA	NA	NA	NA	NA	NA	NA	NA	NA	NA	NA	NA	NA	NA	NA	NA	NA	NA	NA	NA	NA	NA	NA	NA	NA	NA	NA	NA	NA	NA	NA
1591	common	chr19	42772600	42773165	3.4045	2.76696	319	169	4	42772857	42772879	TGTCACATGGGAGTTGTAGTCT	1.43e-07	9	1	CIC	-193	+	protein_coding	2.75061	2.36457	2.59694	2.49057	-0.261972	0.534978	NA	NA	NA	NA	NA	NA	NA	NA	NA	NA	NA	NA	NA	NA	NA	NA	NA	NA	NA	NA	NA	NA	NA	NA
1592	common	chr7	112758458	112758856	5.09097	3.94756	132	73	3	112758655	112758677	GGCATCATAGGAGTCGGCGGCG	0.000229	12	1	LINC00998	11	-	protein_coding	6.25795	6.38319	6.29039	6.29186	-0.0709699	0.78113	NA	NA	NA	NA	NA	NA	NA	NA	NA	NA	NA	NA	NA	NA	NA	NA	NA	NA	NA	NA	NA	NA	NA	NA
1593	F80L absent	chr1	229923585	229924069	1.94753	0.789022	91	45	NA	NA	NA	NA	NA	NA	0	NA	NA	NA	NA	NA	NA	NA	NA	NA	NA	NA	NA	NA	NA	NA	NA	NA	NA	NA	NA	NA	NA	NA	NA	NA	NA	NA	NA	NA	NA	NA	NA	NA	NA
1594	common	chr19	58816375	58816960	4.76337	3.18773	615	330	3	58816606	58816628	GGCCTTCTGGGAAATGGAGTTC	7.11e-11	21	1	ERVK3-1	48	+	protein_coding	5.21723	5.23074	5.60615	5.56468	0.364069	0.0213504	NA	NA	NA	NA	NA	NA	NA	NA	NA	NA	NA	NA	NA	NA	NA	NA	NA	NA	NA	NA	NA	NA	NA	NA
1595	F80L absent	chr13	31416772	31417080	1.64253	1.09707	69	57	NA	NA	NA	NA	NA	NA	0	NA	NA	NA	NA	NA	NA	NA	NA	NA	NA	NA	NA	NA	NA	NA	NA	NA	NA	NA	NA	NA	NA	NA	NA	NA	NA	NA	NA	NA	NA	NA	NA	NA	NA
1596	common	chr12	124923481	124923961	0.746933	-0.340498	62	29	NA	NA	NA	NA	NA	NA	0	NA	NA	NA	NA	NA	NA	NA	NA	NA	NA	NA	NA	NA	NA	NA	NA	NA	NA	NA	NA	NA	NA	NA	NA	NA	NA	NA	NA	NA	NA	NA	NA	NA	NA
1597	F80L absent	chr7	390879	391231	3.0115	1.58113	33	19	NA	NA	NA	NA	NA	NA	0	NA	NA	NA	NA	NA	NA	NA	NA	NA	NA	NA	NA	NA	NA	NA	NA	NA	NA	NA	NA	NA	NA	NA	NA	NA	NA	NA	NA	NA	NA	NA	NA	NA	NA
1598	common	chr7	35084053	35085319	1.23724	-0.15639	128	31	10	35084981	35085003	GGGGCACTGGGGAATGGTGAGG	0.000927	24	0	NA	NA	NA	NA	NA	NA	NA	NA	NA	NA	NA	NA	NA	NA	NA	NA	NA	NA	NA	NA	NA	NA	NA	NA	NA	NA	NA	NA	NA	NA	NA	NA	NA	NA
1599	F80L only	chr12	119013225	119014024	1.70044	1.5025	70	60	1	119013471	119013493	AGGTTTGGGGTGTGTGTAGTAT	0.000818	29	0	NA	NA	NA	NA	NA	NA	NA	NA	NA	NA	NA	NA	NA	NA	NA	NA	NA	NA	NA	NA	NA	NA	NA	NA	NA	NA	NA	NA	NA	NA	NA	NA	NA	NA
1600	F80L only	chr2	48274375	48274628	2.76047	2.49199	35	23	3	48274450	48274472	TCCCCTGGGGGATTTGGAGACT	0.000115	161	0	NA	NA	NA	NA	NA	NA	NA	NA	NA	NA	NA	NA	NA	NA	NA	NA	NA	NA	NA	NA	NA	NA	NA	NA	NA	NA	NA	NA	NA	NA	NA	NA	NA	NA
1601	common	chr9	136464840	136465351	2.05343	0.520609	95	51	NA	NA	NA	NA	NA	NA	0	NA	NA	NA	NA	NA	NA	NA	NA	NA	NA	NA	NA	NA	NA	NA	NA	NA	NA	NA	NA	NA	NA	NA	NA	NA	NA	NA	NA	NA	NA	NA	NA	NA	NA
1602	F80L absent	chr21	37365109	37366878	1.98468	1.21646	179	128	10	37366128	37366150	AGGTGTGTGAGAGTTGGGGTGT	0.000156	6	0	NA	NA	NA	NA	NA	NA	NA	NA	NA	NA	NA	NA	NA	NA	NA	NA	NA	NA	NA	NA	NA	NA	NA	NA	NA	NA	NA	NA	NA	NA	NA	NA	NA	NA
1603	common	chr17	15602720	15603234	4.82809	3.61902	482	267	2	15602965	15602987	GCGCTTCTGGGAATTGTAGTTC	6.47e-10	6	2	ZNF286A	-86	+	protein_coding	5.47119	5.39438	5.48704	5.56377	0.400199	0.000154063	ZNF286A	29	+	protein_coding	5.47119	5.39438	5.48704	5.56377	0.400199	0.000154063	NA	NA	NA	NA	NA	NA	NA	NA	NA	NA	NA	NA	NA	NA
1604	common	chr14	19612853	19613316	1.78034	0.894037	80	30	NA	NA	NA	NA	NA	NA	0	NA	NA	NA	NA	NA	NA	NA	NA	NA	NA	NA	NA	NA	NA	NA	NA	NA	NA	NA	NA	NA	NA	NA	NA	NA	NA	NA	NA	NA	NA	NA	NA	NA	NA
1605	common	chr1	224544020	224544713	3.45185	2.25463	638	365	5	224544490	224544512	GGCATGCCGGGAGTTGTAGTCC	5e-11	11	1	CNIH4	186	+	protein_coding	6.43346	6.5598	6.73633	6.78175	0.28761	0.0241696	NA	NA	NA	NA	NA	NA	NA	NA	NA	NA	NA	NA	NA	NA	NA	NA	NA	NA	NA	NA	NA	NA	NA	NA
1606	F80L absent	chr2	242576742	242577048	1.46701	1.12864	69	43	NA	NA	NA	NA	NA	NA	2	THAP4	-31	-	protein_coding	4.67976	4.36807	4.23726	4.24184	-0.355938	0.289959	ATG4B	-267	+	protein_coding	5.09845	4.8334	4.92837	4.76288	-0.285347	0.4031	NA	NA	NA	NA	NA	NA	NA	NA	NA	NA	NA	NA	NA	NA
1607	common	chr7	72568690	72569100	4.96392	2.93771	249	104	2	72568944	72568966	GGCCTGCCGGGACTTGTAGTCC	4.91e-10	2	1	RP11-396K3.1	138	+	pseudogene	4.98504	5.17233	5.15056	5.10014	-0.00388871	0.989696	NA	NA	NA	NA	NA	NA	NA	NA	NA	NA	NA	NA	NA	NA	NA	NA	NA	NA	NA	NA	NA	NA	NA	NA
1608	F80L absent	chr4	184474014	184475547	1.97863	0.99433	120	71	NA	NA	NA	NA	NA	NA	0	NA	NA	NA	NA	NA	NA	NA	NA	NA	NA	NA	NA	NA	NA	NA	NA	NA	NA	NA	NA	NA	NA	NA	NA	NA	NA	NA	NA	NA	NA	NA	NA	NA	NA
1609	common	chr17	18218087	18218663	4.6167	3.03685	651	296	4	18218358	18218380	GACAGTCTGGGAGTTGTAGTTC	9.1e-09	9	2	TOP3A	-54	-	protein_coding	5.0027	4.92647	5.03166	4.98094	-0.0564552	0.860557	SMCR8	249	+	protein_coding	3.44361	3.36877	3.58135	3.62059	0.172355	0.461236	NA	NA	NA	NA	NA	NA	NA	NA	NA	NA	NA	NA	NA	NA
1610	common	chr16	4818651	4819124	4.06077	2.94524	308	155	3	4818871	4818893	GGCGCTCTGGGAAATGTAGTCC	4.02e-10	13	0	NA	NA	NA	NA	NA	NA	NA	NA	NA	NA	NA	NA	NA	NA	NA	NA	NA	NA	NA	NA	NA	NA	NA	NA	NA	NA	NA	NA	NA	NA	NA	NA	NA	NA
1611	common	chr10	131909166	131909748	3.82723	2.6113	375	207	4	131909548	131909570	TTCCGGGTGGGAGCTGCTGTTG	0.000187	6	1	LINC00959	-376	-	ND	ND	ND	ND	ND	ND	ND	NA	NA	NA	NA	NA	NA	NA	NA	NA	NA	NA	NA	NA	NA	NA	NA	NA	NA	NA	NA	NA	NA	NA	NA
1612	common	chr3	183892258	183892879	4.26754	3.73272	441	236	5	183892569	183892591	GGCCTGACGGGATTTGTAGTCG	3e-08	28	1	AP2M1	-91	+	protein_coding	7.92707	7.77624	7.83952	7.7288	-0.154684	0.360944	NA	NA	NA	NA	NA	NA	NA	NA	NA	NA	NA	NA	NA	NA	NA	NA	NA	NA	NA	NA	NA	NA	NA	NA
1613	common	chr6	157800849	157801467	4.4414	3.77764	1106	545	7	157801167	157801189	AGCCCACTGGGATGTGTAGTTC	1.66e-08	9	0	NA	NA	NA	NA	NA	NA	NA	NA	NA	NA	NA	NA	NA	NA	NA	NA	NA	NA	NA	NA	NA	NA	NA	NA	NA	NA	NA	NA	NA	NA	NA	NA	NA	NA
1614	F80L absent	chr10	46528092	46528721	1.86289	1.12199	93	64	4	46528631	46528653	TACATGGTGGTGTGTGTAATGT	0.000614	18	0	NA	NA	NA	NA	NA	NA	NA	NA	NA	NA	NA	NA	NA	NA	NA	NA	NA	NA	NA	NA	NA	NA	NA	NA	NA	NA	NA	NA	NA	NA	NA	NA	NA	NA
1615	common	chr16	58718400	58718964	4.15019	3.11561	361	182	4	58718697	58718719	GACACGCTGGGAGTTGTAGTTT	2.93e-09	8	1	SLC38A7	326	-	protein_coding	1.42223	1.92979	1.64155	1.4957	-0.110036	0.854498	NA	NA	NA	NA	NA	NA	NA	NA	NA	NA	NA	NA	NA	NA	NA	NA	NA	NA	NA	NA	NA	NA	NA	NA
1616	F80L absent	chr3	97707423	97708448	1.95571	1.03618	111	60	NA	NA	NA	NA	NA	NA	0	NA	NA	NA	NA	NA	NA	NA	NA	NA	NA	NA	NA	NA	NA	NA	NA	NA	NA	NA	NA	NA	NA	NA	NA	NA	NA	NA	NA	NA	NA	NA	NA	NA	NA
1617	common	chr1	230710191	230710595	2.09559	0.837864	56	30	2	230710367	230710389	TGGAATGTGTGCATTGTGTTTT	0.000623	111	0	NA	NA	NA	NA	NA	NA	NA	NA	NA	NA	NA	NA	NA	NA	NA	NA	NA	NA	NA	NA	NA	NA	NA	NA	NA	NA	NA	NA	NA	NA	NA	NA	NA	NA
1618	F80L absent	chr15	90289291	90289928	2.59855	1.25038	111	54	2	90289632	90289654	TGGATGTGTGGAGGTGTGGATG	0.000908	195	0	NA	NA	NA	NA	NA	NA	NA	NA	NA	NA	NA	NA	NA	NA	NA	NA	NA	NA	NA	NA	NA	NA	NA	NA	NA	NA	NA	NA	NA	NA	NA	NA	NA	NA
1619	common	chr16	15149900	15150456	4.10183	3.465	588	332	5	15150101	15150123	GGGGCGCTGGGAAGTGTAGTCC	6.54e-09	27	1	NTAN1	-257	-	protein_coding	4.29793	4.48993	5.1014	5.42425	0.804632	6.97293e-05	NA	NA	NA	NA	NA	NA	NA	NA	NA	NA	NA	NA	NA	NA	NA	NA	NA	NA	NA	NA	NA	NA	NA	NA
1620	common	chr1	22109679	22110434	4.14207	3.40702	532	306	4	22110190	22110212	GGCATGCTGGGATTTGTAGTCT	2.53e-11	13	1	USP48	43	-	protein_coding	4.92932	5.0268	5.11936	5.3107	0.214123	0.188606	NA	NA	NA	NA	NA	NA	NA	NA	NA	NA	NA	NA	NA	NA	NA	NA	NA	NA	NA	NA	NA	NA	NA	NA
1621	common	chr1	244815723	244816426	4.63446	3.58819	1211	691	4	244816166	244816188	TGCATGCTGGGAACTGTAGTCT	8.06e-11	14	1	DESI2	163	+	protein_coding	5.86369	5.85748	6.05897	5.88093	0.10347	0.595332	NA	NA	NA	NA	NA	NA	NA	NA	NA	NA	NA	NA	NA	NA	NA	NA	NA	NA	NA	NA	NA	NA	NA	NA
1622	common	chr10	125704993	125705255	2.53224	1.43384	82	45	2	125705198	125705220	GGGAAGCTGGGAAATGTAGTCT	1.61e-09	136	0	NA	NA	NA	NA	NA	NA	NA	NA	NA	NA	NA	NA	NA	NA	NA	NA	NA	NA	NA	NA	NA	NA	NA	NA	NA	NA	NA	NA	NA	NA	NA	NA	NA	NA
1623	F80L absent	chr18	77588664	77589214	2.67929	1.43426	49	31	NA	NA	NA	NA	NA	NA	0	NA	NA	NA	NA	NA	NA	NA	NA	NA	NA	NA	NA	NA	NA	NA	NA	NA	NA	NA	NA	NA	NA	NA	NA	NA	NA	NA	NA	NA	NA	NA	NA	NA	NA
1624	F80L absent	chr3	195891678	195892381	1.86227	0.672609	84	52	4	195892163	195892185	TGTGTTGTGTGGTGTGTGGTGT	0.000915	87	0	NA	NA	NA	NA	NA	NA	NA	NA	NA	NA	NA	NA	NA	NA	NA	NA	NA	NA	NA	NA	NA	NA	NA	NA	NA	NA	NA	NA	NA	NA	NA	NA	NA	NA
1625	F80L absent	chr7	151552215	151552667	1.84205	1.12279	87	38	NA	NA	NA	NA	NA	NA	0	NA	NA	NA	NA	NA	NA	NA	NA	NA	NA	NA	NA	NA	NA	NA	NA	NA	NA	NA	NA	NA	NA	NA	NA	NA	NA	NA	NA	NA	NA	NA	NA	NA	NA
1626	common	chr1	35243237	35243563	3.14726	1.49672	70	37	NA	NA	NA	NA	NA	NA	0	NA	NA	NA	NA	NA	NA	NA	NA	NA	NA	NA	NA	NA	NA	NA	NA	NA	NA	NA	NA	NA	NA	NA	NA	NA	NA	NA	NA	NA	NA	NA	NA	NA	NA
1627	common	chr3	183735552	183736059	3.67918	2.922	329	185	5	183735806	183735828	GCGCTTCTGGGAAATGTAGTCC	1.37e-09	10	1	ABCC5	-2	-	protein_coding	3.73444	3.84599	3.86888	3.87873	0.0962367	0.698412	NA	NA	NA	NA	NA	NA	NA	NA	NA	NA	NA	NA	NA	NA	NA	NA	NA	NA	NA	NA	NA	NA	NA	NA
1628	common	chr10	47589689	47590144	2.22133	0.610803	68	36	NA	NA	NA	NA	NA	NA	0	NA	NA	NA	NA	NA	NA	NA	NA	NA	NA	NA	NA	NA	NA	NA	NA	NA	NA	NA	NA	NA	NA	NA	NA	NA	NA	NA	NA	NA	NA	NA	NA	NA	NA
1629	common	chr13	113816268	113817098	1.70561	0.47915	146	66	NA	NA	NA	NA	NA	NA	0	NA	NA	NA	NA	NA	NA	NA	NA	NA	NA	NA	NA	NA	NA	NA	NA	NA	NA	NA	NA	NA	NA	NA	NA	NA	NA	NA	NA	NA	NA	NA	NA	NA	NA
1630	common	chr19	4180119	4180584	2.41398	2.14958	260	158	3	4180283	4180305	GGGTTGCTGGGAAATGTAGTCT	3.03e-10	5	0	NA	NA	NA	NA	NA	NA	NA	NA	NA	NA	NA	NA	NA	NA	NA	NA	NA	NA	NA	NA	NA	NA	NA	NA	NA	NA	NA	NA	NA	NA	NA	NA	NA	NA
1631	common	chr19	17970261	17970813	4.51454	3.5675	578	309	4	17970544	17970566	TGCCTTCTGGGAAACGAAGTCT	6.65e-09	33	1	RPL18A	148	+	protein_coding	10.262	9.65975	9.32427	9.11458	-0.650724	0.0015541	NA	NA	NA	NA	NA	NA	NA	NA	NA	NA	NA	NA	NA	NA	NA	NA	NA	NA	NA	NA	NA	NA	NA	NA
1632	F80L absent	chr16	48965626	48965926	2.25507	1.26219	40	21	NA	NA	NA	NA	NA	NA	0	NA	NA	NA	NA	NA	NA	NA	NA	NA	NA	NA	NA	NA	NA	NA	NA	NA	NA	NA	NA	NA	NA	NA	NA	NA	NA	NA	NA	NA	NA	NA	NA	NA	NA
1633	common	chr17	77702411	77702844	2.94756	2.52577	168	84	2	77702542	77702564	GGAATGCTGGGAAATGTAGTCT	1e-10	19	0	NA	NA	NA	NA	NA	NA	NA	NA	NA	NA	NA	NA	NA	NA	NA	NA	NA	NA	NA	NA	NA	NA	NA	NA	NA	NA	NA	NA	NA	NA	NA	NA	NA	NA
1634	common	chr11	134123021	134123665	5.13753	3.78903	643	373	3	134123303	134123325	GGACTTCTGGGAATTGTAGTCC	2.66e-11	22	2	THYN1	-79	-	protein_coding	4.83086	4.95652	5.10936	5.33092	0.261058	0.370633	ACAD8	46	+	protein_coding	3.83794	4.0917	4.55459	4.37782	0.218719	0.4206	NA	NA	NA	NA	NA	NA	NA	NA	NA	NA	NA	NA	NA	NA
1635	F80L absent	chr5	55160448	55160752	2.68131	1.29627	55	29	NA	NA	NA	NA	NA	NA	0	NA	NA	NA	NA	NA	NA	NA	NA	NA	NA	NA	NA	NA	NA	NA	NA	NA	NA	NA	NA	NA	NA	NA	NA	NA	NA	NA	NA	NA	NA	NA	NA	NA	NA
1636	common	chr22	41840293	41840712	3.20001	3.49864	209	145	3	41840535	41840557	AGTGCTCAGGGAAGTGTAGTGT	1.18e-05	21	0	NA	NA	NA	NA	NA	NA	NA	NA	NA	NA	NA	NA	NA	NA	NA	NA	NA	NA	NA	NA	NA	NA	NA	NA	NA	NA	NA	NA	NA	NA	NA	NA	NA	NA
1637	common	chr6	1205533	1205977	1.2173	0.268433	71	25	8	1205887	1205909	TGGGTGCTGGGATAGAGTGGGT	0.000468	19	0	NA	NA	NA	NA	NA	NA	NA	NA	NA	NA	NA	NA	NA	NA	NA	NA	NA	NA	NA	NA	NA	NA	NA	NA	NA	NA	NA	NA	NA	NA	NA	NA	NA	NA
1638	F80L absent	chr9	38629005	38629818	1.75385	1.11949	107	53	NA	NA	NA	NA	NA	NA	0	NA	NA	NA	NA	NA	NA	NA	NA	NA	NA	NA	NA	NA	NA	NA	NA	NA	NA	NA	NA	NA	NA	NA	NA	NA	NA	NA	NA	NA	NA	NA	NA	NA	NA
1639	F80L absent	chr20	49084588	49084934	2.19858	2.81308	40	42	NA	NA	NA	NA	NA	NA	0	NA	NA	NA	NA	NA	NA	NA	NA	NA	NA	NA	NA	NA	NA	NA	NA	NA	NA	NA	NA	NA	NA	NA	NA	NA	NA	NA	NA	NA	NA	NA	NA	NA	NA
1640	common	chr17	899834	900481	3.94773	2.71747	541	365	3	900037	900059	CGCTTCCTGGGAAATGTAGTTG	1.73e-08	6	1	TIMM22	200	+	protein_coding	3.71149	3.81558	3.8885	3.85798	0.0837489	0.760998	NA	NA	NA	NA	NA	NA	NA	NA	NA	NA	NA	NA	NA	NA	NA	NA	NA	NA	NA	NA	NA	NA	NA	NA
1641	F80L only	chr21	14375598	14375894	0.330402	-0.778467	41	18	4	14375501	14375523	GGCCAGGCTGGTCTTGAAGTCC	0.000142	119	0	NA	NA	NA	NA	NA	NA	NA	NA	NA	NA	NA	NA	NA	NA	NA	NA	NA	NA	NA	NA	NA	NA	NA	NA	NA	NA	NA	NA	NA	NA	NA	NA	NA	NA
1642	common	chr8	30890807	30891385	3.47511	2.66428	281	126	3	30891116	30891138	AGCACCTCGGGAAGTGTAGTCT	6.52e-08	20	2	PURG	135	-	protein_coding	1.23266	0.757023	1.59455	1.29278	0.47491	0.343301	WRN	221	+	protein_coding	4.05572	4.07211	4.22574	4.07639	0.0303673	0.912498	NA	NA	NA	NA	NA	NA	NA	NA	NA	NA	NA	NA	NA	NA
1643	common	chr19	46389354	46390306	3.12643	2.27804	423	221	3	46389443	46389465	AGCCTTCTGGGAAACGTAGTCC	2.34e-10	26	1	IRF2BP1	-454	-	protein_coding	3.82069	3.08576	3.22497	2.95233	-0.428677	0.353282	NA	NA	NA	NA	NA	NA	NA	NA	NA	NA	NA	NA	NA	NA	NA	NA	NA	NA	NA	NA	NA	NA	NA	NA
1644	common	chr10	38265336	38265857	3.72985	3.35279	409	232	5	38265613	38265635	GGCCTTCTGGGAAGCGTAGTTC	4.31e-10	6	2	ZNF25	-35	-	protein_coding	1.69153	1.69153	2.31615	2.10434	0.546791	0.0307086	RP11-393J16.4	157	+	ND	ND	ND	ND	ND	ND	ND	NA	NA	NA	NA	NA	NA	NA	NA	NA	NA	NA	NA	NA	NA
1645	common	chr1	67895917	67896507	4.25479	3.2399	546	305	3	67896198	67896220	TGCGTCCTGGGAATTGTAGTCC	2.85e-10	19	1	SERBP1	-114	-	protein_coding	9.09461	9.01742	8.9349	9.34767	-0.0101375	0.966905	NA	NA	NA	NA	NA	NA	NA	NA	NA	NA	NA	NA	NA	NA	NA	NA	NA	NA	NA	NA	NA	NA	NA	NA
1646	F80L absent	chr17	896574	897830	1.61847	0.753518	112	71	NA	NA	NA	NA	NA	NA	0	NA	NA	NA	NA	NA	NA	NA	NA	NA	NA	NA	NA	NA	NA	NA	NA	NA	NA	NA	NA	NA	NA	NA	NA	NA	NA	NA	NA	NA	NA	NA	NA	NA	NA
1647	common	chr19	4035792	4036164	2.75236	1.41823	109	49	1	4035704	4035726	GGGCATGCGGGTGTGGGTGTGC	0.000285	127	0	NA	NA	NA	NA	NA	NA	NA	NA	NA	NA	NA	NA	NA	NA	NA	NA	NA	NA	NA	NA	NA	NA	NA	NA	NA	NA	NA	NA	NA	NA	NA	NA	NA	NA
1648	common	chr2	178417509	178418057	3.07815	3.01816	176	120	2	178417762	178417784	TGCATGCTGGGAGACGTAGTCC	2.92e-10	8	1	TTC30B	-41	-	protein_coding	1.88362	2.1375	2.03914	1.91073	-0.0670067	0.894287	NA	NA	NA	NA	NA	NA	NA	NA	NA	NA	NA	NA	NA	NA	NA	NA	NA	NA	NA	NA	NA	NA	NA	NA
1649	F80L absent	chr2	3298089	3299143	2.21155	1.3264	80	46	NA	NA	NA	NA	NA	NA	0	NA	NA	NA	NA	NA	NA	NA	NA	NA	NA	NA	NA	NA	NA	NA	NA	NA	NA	NA	NA	NA	NA	NA	NA	NA	NA	NA	NA	NA	NA	NA	NA	NA	NA
1650	common	chr1	212588030	212588556	3.8911	3.34506	429	282	3	212588287	212588309	GTGTTGATGGGAAATGTAGTTC	5.89e-08	3	1	TMEM206	-50	-	protein_coding	4.12019	4.0365	4.53107	4.45615	0.440534	0.0133008	NA	NA	NA	NA	NA	NA	NA	NA	NA	NA	NA	NA	NA	NA	NA	NA	NA	NA	NA	NA	NA	NA	NA	NA
1651	common	chrX	47049940	47050274	3.13968	2.26651	176	109	3	47050067	47050089	GGCATGCTGGGGGTGGTAGTTC	3.15e-09	11	1	UBA1	153	+	protein_coding	7.30889	7.00888	6.98482	6.85512	-0.278054	0.155202	NA	NA	NA	NA	NA	NA	NA	NA	NA	NA	NA	NA	NA	NA	NA	NA	NA	NA	NA	NA	NA	NA	NA	NA
1652	common	chr7	102389156	102389540	3.78575	3.01735	132	84	3	102389378	102389400	AGGCCGACGGGATAGGTAGTTC	4.56e-07	3	1	FAM185A	70	+	protein_coding	2.75275	3	3.25399	3.31615	0.137667	0.777396	NA	NA	NA	NA	NA	NA	NA	NA	NA	NA	NA	NA	NA	NA	NA	NA	NA	NA	NA	NA	NA	NA	NA	NA
1653	common	chr1	234234391	234234633	1.84067	1.19325	60	42	5	234234510	234234532	TTGGTGGTGGTGGTGGCAGTTC	0.000768	5	0	NA	NA	NA	NA	NA	NA	NA	NA	NA	NA	NA	NA	NA	NA	NA	NA	NA	NA	NA	NA	NA	NA	NA	NA	NA	NA	NA	NA	NA	NA	NA	NA	NA	NA
1654	common	chr7	149700582	149701295	2.50267	0.997039	107	61	8	149700808	149700830	GGTGTGGTGTGGTGTGTGGTGT	0.000899	29	0	NA	NA	NA	NA	NA	NA	NA	NA	NA	NA	NA	NA	NA	NA	NA	NA	NA	NA	NA	NA	NA	NA	NA	NA	NA	NA	NA	NA	NA	NA	NA	NA	NA	NA
1655	common	chr3	126422758	126423264	4.51472	2.63249	408	231	2	126422967	126422989	TGCCTTGTGGGGATTGCAGTCC	9.56e-08	10	1	CHCHD6	52	+	protein_coding	3.76977	3.43829	3.98368	4.05572	0.389717	0.256595	NA	NA	NA	NA	NA	NA	NA	NA	NA	NA	NA	NA	NA	NA	NA	NA	NA	NA	NA	NA	NA	NA	NA	NA
1656	F80L absent	chr5	654170	654586	1.60142	0.532274	54	25	NA	NA	NA	NA	NA	NA	0	NA	NA	NA	NA	NA	NA	NA	NA	NA	NA	NA	NA	NA	NA	NA	NA	NA	NA	NA	NA	NA	NA	NA	NA	NA	NA	NA	NA	NA	NA	NA	NA	NA	NA
1657	common	chr14	78227420	78227757	3.47451	3.21188	112	65	2	78227579	78227601	GGCCTTCTGGGATTTGTAGTTC	1.15e-11	35	2	SNW1	-38	-	protein_coding	6.26866	6.18725	5.79416	5.89288	-0.474139	3.96724e-05	C14orf178	-415	+	ND	ND	ND	ND	ND	ND	ND	NA	NA	NA	NA	NA	NA	NA	NA	NA	NA	NA	NA	NA	NA
1658	common	chr6	170407142	170407556	2.05585	0.935496	63	21	2	170407266	170407288	GTGCTGTCGGGAGCTGTGTGGT	0.000679	22	0	NA	NA	NA	NA	NA	NA	NA	NA	NA	NA	NA	NA	NA	NA	NA	NA	NA	NA	NA	NA	NA	NA	NA	NA	NA	NA	NA	NA	NA	NA	NA	NA	NA	NA
1659	common	chr10	47022870	47023399	1.69422	1.51148	151	121	2	47023319	47023341	TGTATTCTGTGGTGTGTGATGT	0.000507	21	0	NA	NA	NA	NA	NA	NA	NA	NA	NA	NA	NA	NA	NA	NA	NA	NA	NA	NA	NA	NA	NA	NA	NA	NA	NA	NA	NA	NA	NA	NA	NA	NA	NA	NA
1660	common	chr6	163295871	163296500	2.50162	1.35299	103	43	NA	NA	NA	NA	NA	NA	0	NA	NA	NA	NA	NA	NA	NA	NA	NA	NA	NA	NA	NA	NA	NA	NA	NA	NA	NA	NA	NA	NA	NA	NA	NA	NA	NA	NA	NA	NA	NA	NA	NA	NA
[truncated: 893 more rows]
[truncated: 6 more columns]
